# Supplementary material for: A Commander-independent function of COMMD3 in endosomal trafficking
Source: eLife journal article supplement (doi:10.7554/elife.105264), 2025-02-17

# Fig. 7c

Anti-HA

M.W. kDa

65 -  
50 -  
40 -  
30 -  
20 -  
10 -  
5 -

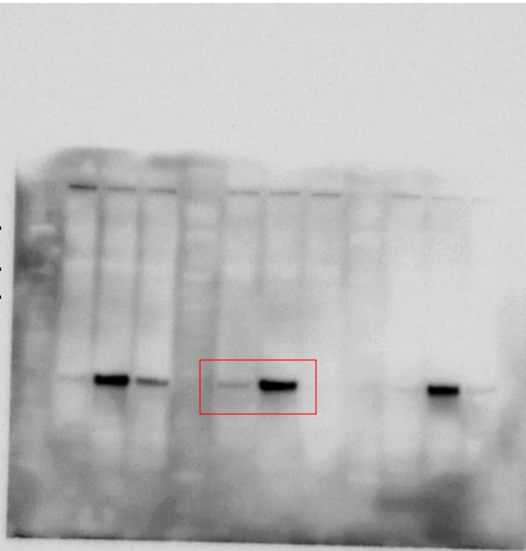

M.W. kDa

Anti-FLAG (NTD-mCh)

Anti-alpha tubulin

65 -  
50 -  
40 -  
30 -  
20 -  
10 -  
5 -

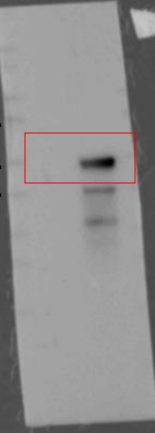

65 -  
50 -  
40 -  
30 -  
20 -  
10 -  
5 -

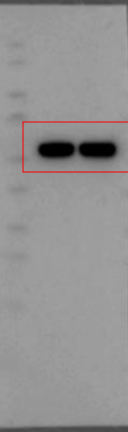

# Fig. 7d

M.W. kDa

Anti-TfR

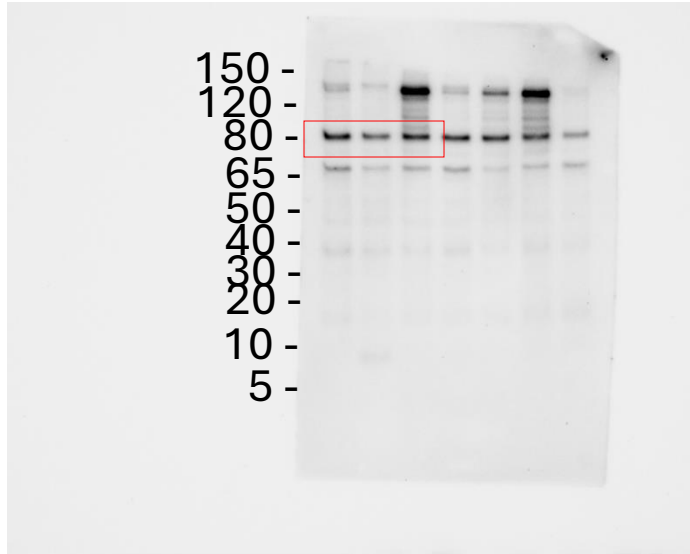

M.W. kDa

Anti-FLAG

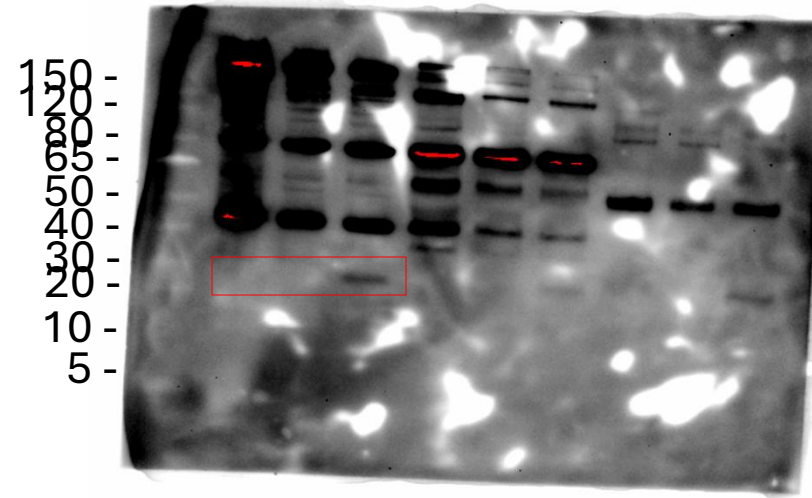

M.W. kDa

Anti-Arf1

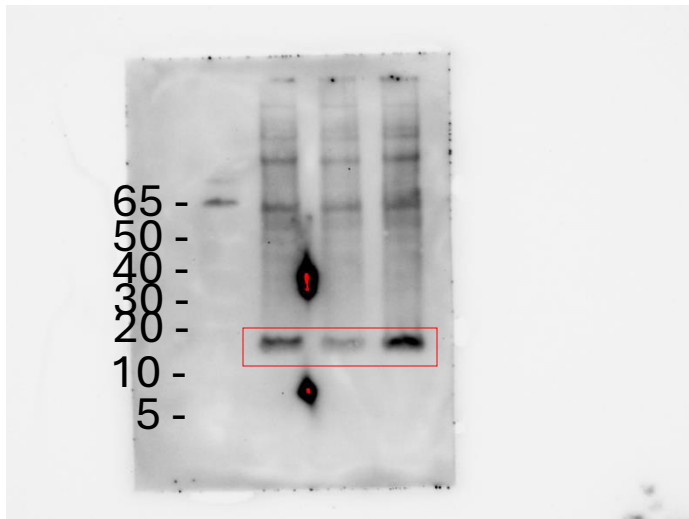

M.W. kDa

Anti-Alpha tubulin

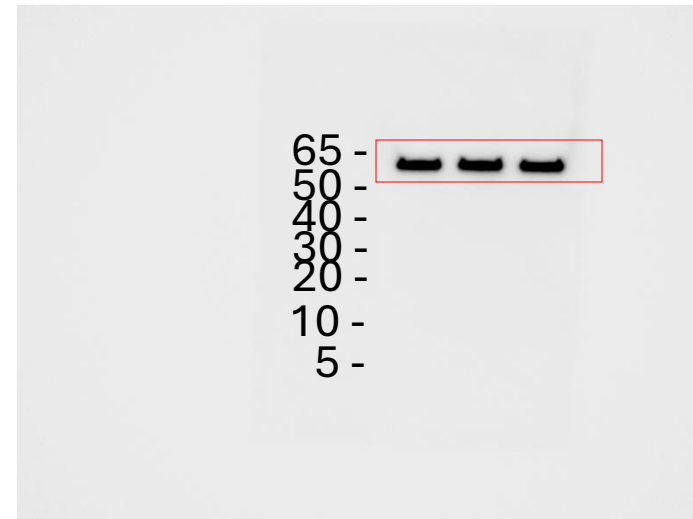

Supplement: fig7-data2 [file elife-105264-fig7-data2-v1.zip]
