# Supplementary material for: A Commander-independent function of COMMD3 in endosomal trafficking
Source: eLife. 2025 Aug 21;14:RP105264. doi: 10.7554/eLife.105264 (PMC12370252; doi:10.7554/eLife.105264)
Supplement: Figure 1—source data 1. [file elife-105264-fig1-data1.xlsx]

## Sheet: GLUT-SPR Defective Screen
id	pos|p-value	pos|fdr	pos|rank	pos|goodsgrna	- log 10 pvalue
Rab10	2.183e-07	0.001238	1	6	6.66095
Vps35	2.183e-07	0.001238	2	6	6.66095
Vps29	2.183e-07	0.001238	3	5	6.66095
Tada2b	2.183e-07	0.001238	4	6	6.66095
Traf3	6.5491e-07	0.00297	5	6	6.18382
Rab7	1.9647e-06	0.006365	6	6	5.7067
Prkaa1	1.9647e-06	0.006365	7	5	5.7067
Ccdc101	4.5844e-06	0.012995	8	5	5.33872
Pabpc4	6.3308e-06	0.015952	9	5	5.19854
Olfr976	1.2007e-05	0.027228	10	6	4.92057
Rabif	1.55e-05	0.031953	11	5	4.80967
Taf5l	3.3401e-05	0.063119	12	5	4.47624
Rnase9	0.00010893	0.175908	13	1	3.96285
Prkab1	0.00011286	0.175908	14	5	3.94746
Atxn7l3	0.00011636	0.175908	15	5	3.9342
Supt20	0.00013076	0.178509	16	5	3.88353
Ezh2	0.00013382	0.178509	17	4	3.87348
Stat1	0.00016351	0.205996	18	5	3.78646
Tada1	0.00021547	0.257165	19	4	3.66661
Ift27	0.00028227	0.300405	20	4	3.54934
Ifnar1	0.00028314	0.300405	21	5	3.548
Stag2	0.00029144	0.300405	22	5	3.53545
Chac1	0.00031108	0.306715	23	2	3.50713
Thnsl2	0.000384	0.3435	24	4	3.41567
Reps1	0.00039753	0.3435	25	4	3.40063
Smarca4	0.00040888	0.3435	26	5	3.3884
Dennd4c	0.000427	0.3435	27	5	3.36957
Prdm4	0.00044119	0.3435	28	3	3.35537
Scand1	0.00044163	0.3435	29	5	3.35494
Olfr203	0.00045604	0.3435	30	5	3.341
Ubd	0.00046957	0.3435	31	4	3.3283
Fahd2a	0.00061999	0.42447	32	4	3.20762
Scgb1b24	0.00065251	0.42447	33	4	3.18541
Irf9	0.0006547	0.42447	34	4	3.18396
Soga3	0.00065513	0.42447	35	3	3.18367
Sh3tc1	0.00074333	0.453542	36	5	3.12882
Tm2d1	0.00074857	0.453542	37	3	3.12577
Cd209e	0.00077302	0.453542	38	4	3.11181
mmu-mir-224	0.00078	0.453542	39	2	3.10791
Cd80	0.00092452	0.508604	40	4	3.03408
Nol9	0.00093369	0.508604	41	3	3.0298
Olfr1347	0.00094198	0.508604	42	4	3.02596
Angel1	0.0010625	0.509304	43	2	2.97367
Brd4	0.0010848	0.509304	44	3	2.96465
A630007B06Rik	0.0010979	0.509304	45	2	2.95944
Hsd17b10	0.0011096	0.509304	46	2	2.95483
Ubap2l	0.001128	0.509304	47	4	2.94769
mmu-mir-6351	0.001159	0.509304	48	2	2.93592
Pecam1	0.0011655	0.509304	49	2	2.93349
Tmprss7	0.0011695	0.509304	50	4	2.932
mmu-mir-541	0.0011795	0.509304	51	3	2.9283
Mfsd11	0.0011812	0.509304	52	3	2.92768
Magt1	0.0011948	0.509304	53	4	2.9227
Adipor1	0.001217	0.509304	54	3	2.91471
Sun3	0.0012432	0.509304	55	2	2.90546
Cd93	0.0012948	0.509304	56	3	2.8878
Slc25a3	0.0012987	0.509304	57	4	2.88649
Kif5b	0.0013026	0.509304	58	4	2.88519
Avpr1b	0.0013956	0.536416	59	2	2.85524
Glt25d1	0.001479	0.558993	60	4	2.83003
Ccl7	0.0015113	0.561841	61	2	2.82065
Kif23	0.0015545	0.564906	62	1	2.80841
Igsf1	0.0015694	0.564906	63	2	2.80427
Pigb	0.0016362	0.579749	64	4	2.78616
Mrps2	0.0017266	0.593234	65	1	2.76281
Gm5108	0.0017497	0.593234	66	3	2.75704
Peli2	0.0017598	0.593234	67	3	2.75454
Ddit4	0.0018139	0.593234	68	4	2.74139
Gm13826	0.001889	0.593234	69	2	2.72377
Naa30	0.0019021	0.593234	70	3	2.72077
Vmn1r31	0.0019656	0.593234	71	2	2.7065
Glp2r	0.0019702	0.593234	72	4	2.70549
Rpl34	0.0019811	0.593234	73	2	2.70309
Tmem30a	0.0019824	0.593234	74	4	2.70281
Vmn1r38	0.0020305	0.593234	75	3	2.6924
Vmn1r179	0.0020339	0.593234	76	3	2.69167
Pxdc1	0.0020396	0.593234	77	2	2.69045
Slc39a11	0.0020405	0.593234	78	1	2.69026
Ralbp1	0.002085	0.598509	79	4	2.68089
Arl11	0.0021409	0.605452	80	2	2.6694
Smim6	0.0022016	0.605452	81	1	2.65726
Olr1	0.0022138	0.605452	82	3	2.65486
Clgn	0.002216	0.605452	83	4	2.65443
Appl2	0.0022824	0.607376	84	2	2.64161
Slc37a2	0.002302	0.607376	85	4	2.63789
Thrap3	0.0023413	0.607376	86	4	2.63054
Adra1b	0.0023597	0.607376	87	1	2.62714
Vmn1r78	0.0024575	0.607376	88	4	2.60951
Tnfrsf8	0.0024614	0.607376	89	4	2.60882
Dpagt1	0.0024614	0.607376	90	3	2.60882
Raver1	0.0024644	0.607376	91	4	2.60829
Vmn2r67	0.0024933	0.607376	92	4	2.60323
Slc7a12	0.0025199	0.607376	93	4	2.59862
Snx2	0.0025234	0.607376	94	1	2.59801
Slc2a12	0.0025692	0.607376	95	4	2.5902
Hpca	0.0025897	0.607376	96	3	2.58675
Akap5	0.0026443	0.607376	97	4	2.57769
Fam221b	0.0026692	0.607376	98	4	2.57362
Grin3b	0.0026727	0.607376	99	2	2.57305
Gm13177	0.0026784	0.607376	100	2	2.57212
Rpp40	0.0027247	0.611754	101	2	2.56468
Olfr62	0.0027674	0.615269	102	4	2.55793
Hmgb4	0.0028028	0.615813	103	1	2.55241
Kif2b	0.0028242	0.615813	104	3	2.5491
2610305D13Rik	0.0029107	0.626122	105	4	2.536
1700054O13Rik	0.0029469	0.626122	106	4	2.53063
Atad5	0.0029543	0.626122	107	2	2.52955
Gm2012	0.0030085	0.628259	108	1	2.52165
Wfdc6b	0.0030198	0.628259	109	4	2.52002
Hsd3b1	0.0031063	0.632578	110	2	2.50776
2310009B15Rik	0.0031237	0.632578	111	2	2.50533
Arhgap8	0.0031294	0.632578	112	4	2.50454
Rab8a	0.0031687	0.632578	113	4	2.49912
Slc16a7	0.00318	0.632578	114	2	2.49757
Supt6	0.0032678	0.636079	115	1	2.48574
Smc3	0.0033075	0.636079	116	4	2.4805
Kat5	0.0033521	0.636079	117	2	2.47468
Rps27l	0.0034075	0.636079	118	2	2.46756
Taf6l	0.0034176	0.636079	119	4	2.46628
Dnpep	0.0034202	0.636079	120	3	2.46595
Pdk3	0.0034368	0.636079	121	4	2.46385
Exosc9	0.0034761	0.636079	122	2	2.45891
Cep164	0.0034861	0.636079	123	3	2.45766
Cab39	0.0035036	0.636079	124	4	2.45549
Gltscr1	0.0035062	0.636079	125	4	2.45516
Gbx1	0.0035468	0.638339	126	1	2.45016
Riok3	0.0037057	0.66169	127	2	2.43113
Cd99l2	0.0038494	0.681365	128	2	2.41461
Sptlc3	0.003876	0.681365	129	4	2.41162
Mbd1	0.0040079	0.692357	130	3	2.39708
Alpl	0.0040144	0.692357	131	3	2.39638
Ift74	0.0040301	0.692357	132	4	2.39468
Med4	0.0040952	0.698243	133	3	2.38772
Acsm2	0.0041908	0.707024	134	2	2.3777
Ttn	0.0042253	0.707024	135	3	2.37414
Krtap6-2	0.0042659	0.707024	136	4	2.36999
Rcn3	0.0042781	0.707024	137	4	2.36875
Wsb2	0.0043026	0.707024	138	1	2.36627
Tln1	0.0043445	0.708776	139	2	2.36206
Stard3	0.004458	0.713031	140	1	2.35086
Fstl1	0.004537	0.713031	141	4	2.34323
mmu-mir-8105	0.0045929	0.713031	142	1	2.33791
Gde1	0.0046243	0.713031	143	1	2.33495
Brd9	0.004634	0.713031	144	4	2.33404
Steap1	0.0046567	0.713031	145	2	2.33192
Pcdh17	0.0046759	0.713031	146	3	2.33013
Mettl7b	0.0047008	0.713031	147	4	2.32783
Top2a	0.0047187	0.713031	148	3	2.32618
Aldoart1	0.0047501	0.713031	149	4	2.3233
Sgms1	0.0047671	0.713031	150	4	2.32175
Sprr2i	0.0048335	0.713031	151	4	2.31574
Ncoa5	0.0048396	0.713031	152	3	2.31519
Jak1	0.0048483	0.713031	153	4	2.31441
Shisa9	0.0048732	0.713031	154	3	2.31219
Fam178b	0.0048737	0.713031	155	3	2.31214
Ppm1m	0.0049081	0.713474	156	1	2.30909
Degs1	0.0050142	0.723052	157	3	2.2998
St3gal4	0.0050586	0.723052	158	1	2.29597
Commd3	0.0050697	0.723052	159	4	2.29502
Wac	0.0052103	0.735348	160	2	2.28314
Olfr805	0.0052208	0.735348	161	4	2.28226
Trappc10	0.0052893	0.737138	162	2	2.2766
Hils1	0.0052985	0.737138	163	3	2.27585
Cdhr5	0.0053797	0.743872	164	1	2.26924
Sumf2	0.0054325	0.744875	165	4	2.265
Lrrc63	0.0054936	0.744875	166	2	2.26014
Rtn4rl2	0.0055268	0.744875	167	2	2.25753
Ccdc158	0.0055473	0.744875	168	2	2.25592
Hlf	0.0055823	0.744875	169	2	2.25319
Olfr791	0.005584	0.744875	170	3	2.25305
Dennd2c	0.0056905	0.754647	171	2	2.24485
Gm2863	0.0058137	0.761893	172	1	2.23555
Fam118a	0.0058442	0.761893	173	3	2.23327
Atxn7	0.005846	0.761893	174	3	2.23314
Esp36	0.0059604	0.772249	175	2	2.22472
Vmn1r75	0.0059936	0.772249	176	1	2.22231
Pola1	0.0060874	0.779913	177	3	2.21557
Zfp809	0.006156	0.784264	178	1	2.2107
Zdhhc19	0.0063127	0.79974	179	3	2.19978
AA792892	0.006445	0.801881	180	1	2.19078
Nupl1	0.0064638	0.801881	181	2	2.18951
mmu-mir-500	0.0064856	0.801881	182	2	2.18805
Mcpt9	0.0064882	0.801881	183	3	2.18788
Gm4975	0.0065515	0.801881	184	3	2.18366
Mfng	0.0065546	0.801881	185	4	2.18345
Foxc2	0.0066061	0.801881	186	4	2.18005
Depdc5	0.0066847	0.801881	187	4	2.17492
Suv420h1	0.0066847	0.801881	188	2	2.17492
Msh5	0.0067869	0.801881	189	4	2.16833
Krtap19-5	0.0069087	0.801881	190	4	2.1606
Adrbk2	0.0069161	0.801881	191	1	2.16014
Cluap1	0.0069471	0.801881	192	3	2.1582
Fut2	0.006972	0.801881	193	3	2.15664
Gm11545	0.0070261	0.801881	194	4	2.15329
mmu-mir-344f	0.0070523	0.801881	195	3	2.15167
Irgq	0.0070632	0.801881	196	2	2.151
Col1a1	0.007065	0.801881	197	4	2.15089
Sfta2	0.0070868	0.801881	198	4	2.14955
Phf5a	0.0070999	0.801881	199	2	2.14875
Cldn20	0.0071584	0.801881	200	3	2.14518
Kif17	0.0072213	0.801881	201	2	2.14138
Apbb2	0.0072222	0.801881	202	4	2.14133
Mb21d2	0.0072318	0.801881	203	2	2.14075
Arsk	0.0072759	0.801881	204	4	2.13811
Olfr689	0.0073737	0.801881	205	2	2.13231
Spred1	0.0073981	0.801881	206	4	2.13088
Mapkap1	0.0074457	0.801881	207	2	2.12809
Olfr748	0.0074641	0.801881	208	3	2.12702
Slc12a3	0.007468	0.801881	209	4	2.1268
Cyp2d26	0.007506	0.801881	210	1	2.12459
Krtap31-2	0.0075745	0.801881	211	2	2.12065
2700029M09Rik	0.007695	0.801881	212	2	2.11379
Mlana	0.0077134	0.801881	213	4	2.11275
Ccdc110	0.0077382	0.801881	214	3	2.11136
Dchs1	0.0077557	0.801881	215	3	2.11038
Tbcel	0.0077675	0.801881	216	4	2.10972
Nutm1	0.0077968	0.801881	217	1	2.10808
Slc25a5	0.0078622	0.801881	218	2	2.10446
Pde1a	0.0078758	0.801881	219	3	2.10371
Tnip1	0.0078863	0.801881	220	4	2.10313
Armc3	0.0079266	0.801881	221	3	2.10091
Meis3	0.0079365	0.801881	222	4	2.10037
Alox15	0.0079439	0.801881	223	3	2.09997
Clcn4-2	0.0080766	0.801881	224	2	2.09277
Cpne7	0.0081556	0.801881	225	4	2.08854
Ybx1	0.0081618	0.801881	226	3	2.08821
Dusp23	0.0081893	0.801881	227	2	2.08675
Hsd17b13	0.0082172	0.801881	228	1	2.08528
Col9a1	0.0082268	0.801881	229	2	2.08477
Paxip1	0.0082403	0.801881	230	3	2.08406
Pde9a	0.0083556	0.801881	231	1	2.07802
Dmwd	0.0083892	0.801881	232	4	2.07628
Snai1	0.0083949	0.801881	233	4	2.07598
Olfr618	0.0084368	0.801881	234	4	2.07382
Ilf3	0.0084665	0.801881	235	3	2.0723
Hr	0.0084914	0.801881	236	3	2.07102
1700056E22Rik	0.0085067	0.801881	237	1	2.07024
H2-M5	0.0085119	0.801881	238	3	2.06997
Olfr798	0.0086267	0.801881	239	2	2.06416
Rundc1	0.0086521	0.801881	240	1	2.06288
Stat2	0.0086569	0.801881	241	4	2.06264
Insr	0.0086608	0.801881	242	4	2.06244
Pfkfb3	0.0086647	0.801881	243	4	2.06225
Peli1	0.008708	0.801881	244	3	2.06008
Hoxd10	0.0087333	0.801881	245	2	2.05882
Dtd2	0.0087726	0.801881	246	3	2.05687
Syce2	0.0087743	0.801881	247	4	2.05679
Krt84	0.0087748	0.801881	248	4	2.05676
D14Abb1e	0.0088049	0.801881	249	2	2.05528
Baz1a	0.0089079	0.803526	250	4	2.05022
Slc2a2	0.008938	0.803526	251	1	2.04876
9230110F15Rik	0.0089586	0.803526	252	4	2.04776
Htt	0.0089647	0.803526	253	4	2.04746
Mtbp	0.0090778	0.805617	254	2	2.04202
Gtf2f1	0.0090813	0.805617	255	4	2.04185
Pnrc1	0.0091961	0.805617	256	2	2.0364
Actn4	0.0091961	0.805617	257	4	2.0364
Ndst1	0.0092314	0.805617	258	1	2.03473
Abca17	0.0092363	0.805617	259	4	2.0345
Otog	0.0092367	0.805617	260	2	2.03448
Psmb4	0.0092869	0.805899	261	3	2.03213
Olfr164	0.0093262	0.805899	262	3	2.0303
Znrf2	0.0093541	0.805899	263	3	2.029
Ankrd40	0.0093821	0.805899	264	2	2.0277
Cd37	0.0094685	0.810256	265	2	2.02372
Pcdh18	0.0095362	0.812979	266	1	2.02062
Agbl3	0.0096711	0.817376	267	4	2.01452
Pogz	0.0096925	0.817376	268	2	2.01356
Pnma5	0.0097113	0.817376	269	4	2.01272
Lzts2	0.0097576	0.817376	270	2	2.01066
Mga	0.0097864	0.817376	271	3	2.00938
Pkd1l3	0.0098078	0.817376	272	4	2.00843
Mmp7	0.0098401	0.817376	273	2	2.007
Arhgap27	0.0099174	0.817984	274	2	2.0036
Utrn	0.0099195	0.817984	275	4	2.00351
Vmn1r212	0.0099907	0.820867	276	3	2.0004
Vmn1r69	0.010049	0.821624	277	3	1.99788
A1bg	0.010118	0.821624	278	4	1.99491
Col19a1	0.01014	0.821624	279	2	1.99396
Zfand2b	0.010149	0.821624	280	3	1.99358
Slc35d1	0.010181	0.821624	281	4	1.99221
Pole3	0.010283	0.825298	282	2	1.98788
Wbscr17	0.010299	0.825298	283	3	1.9872
H3f3b	0.010386	0.825801	284	3	1.98355
Efcab6	0.010425	0.825801	285	2	1.98192
BC049762	0.010448	0.825801	286	3	1.98097
Smurf1	0.010451	0.825801	287	3	1.98084
Zufsp	0.010659	0.839298	288	2	1.97228
Fam89b	0.010733	0.840456	289	2	1.96928
Troap	0.010779	0.840456	290	3	1.96742
Gdap1	0.010865	0.840456	291	4	1.96397
Hnrnph2	0.010866	0.840456	292	4	1.96393
Olfr1131	0.010875	0.840456	293	1	1.96357
Med15	0.010896	0.840456	294	4	1.96273
Olfr960	0.011006	0.840985	295	3	1.95837
Ticrr	0.011024	0.840985	296	2	1.95766
Gpd2	0.011049	0.840985	297	3	1.95668
Cpne2	0.01116	0.840985	298	2	1.95234
Ap5m1	0.011162	0.840985	299	2	1.95226
Tigit	0.011196	0.840985	300	4	1.95094
Dgat2	0.011251	0.840985	301	2	1.94881
Crybg3	0.011286	0.840985	302	3	1.94746
Atp5l	0.011297	0.840985	303	1	1.94704
Wfdc11	0.011377	0.840985	304	2	1.94397
Ptpn14	0.011419	0.840985	305	1	1.94237
Clk3	0.01145	0.840985	306	3	1.94119
Rpl36	0.011488	0.840985	307	2	1.93976
Fam222a	0.011509	0.840985	308	3	1.93896
Tcea3	0.011529	0.840985	309	1	1.93821
Cdkl1	0.011538	0.840985	310	3	1.93787
Pgk1	0.011608	0.840985	311	3	1.93524
Nfrkb	0.011636	0.840985	312	2	1.9342
Il20ra	0.011653	0.840985	313	3	1.93356
Lcn2	0.011682	0.840985	314	3	1.93248
Dcaf4	0.011713	0.840985	315	3	1.93133
Acad8	0.01174	0.840985	316	3	1.93033
Slc25a51	0.011865	0.840985	317	3	1.92573
Triap1	0.011893	0.840985	318	2	1.92471
Nptx2	0.011906	0.840985	319	1	1.92423
Olfr845	0.011906	0.840985	320	2	1.92423
1110008F13Rik	0.011925	0.840985	321	3	1.92354
Usp46	0.011941	0.840985	322	3	1.92296
Bckdk	0.01205	0.843983	323	2	1.91901
Olfr809	0.012058	0.843983	324	1	1.91872
Smad4	0.012148	0.846316	325	3	1.9155
Arl8b	0.01217	0.846316	326	1	1.91471
Sec11c	0.012278	0.846316	327	3	1.91087
Rad54l2	0.01228	0.846316	328	2	1.9108
mmu-mir-7022	0.012379	0.846316	329	2	1.90731
Snhg11	0.012394	0.846316	330	2	1.90679
Tmem225	0.012409	0.846316	331	2	1.90626
Ide	0.01245	0.846316	332	2	1.90483
Olfr392	0.012471	0.846316	333	2	1.9041
Macrod2	0.012541	0.846316	334	2	1.90167
Samd14	0.012602	0.846316	335	3	1.89956
Cldn6	0.012686	0.846316	336	3	1.89668
Pop5	0.012689	0.846316	337	1	1.89657
Ifna2	0.012689	0.846316	338	2	1.89657
Chp2	0.012689	0.846316	339	1	1.89657
Creb1	0.012689	0.846316	340	2	1.89657
Adam24	0.012819	0.850168	341	2	1.89215
Pnpla8	0.012822	0.850168	342	3	1.89204
Slc4a7	0.012863	0.850403	343	2	1.89066
N6amt1	0.013028	0.853183	344	2	1.88512
Rfx6	0.013028	0.853183	345	2	1.88512
Olfr247	0.013048	0.853183	346	1	1.88446
Aco2	0.013055	0.853183	347	3	1.88422
Nop16	0.013158	0.856984	348	3	1.88081
Accs	0.013205	0.856984	349	2	1.87926
Aldh7a1	0.013241	0.856984	350	2	1.87808
Rtel1	0.013295	0.856984	351	2	1.87631
Akt2	0.013302	0.856984	352	2	1.87608
Abhd8	0.013402	0.858687	353	1	1.87283
mmu-mir-200b	0.013405	0.858687	354	3	1.87273
Cd5	0.013513	0.861647	355	2	1.86925
Cdkn3	0.013588	0.861647	356	2	1.86684
Ndrg2	0.013618	0.861647	357	3	1.86589
Usp22	0.013661	0.861647	358	3	1.86452
3110009E18Rik	0.013679	0.861647	359	3	1.86395
Mybl1	0.013679	0.861647	360	1	1.86395
Gba2	0.013822	0.864579	361	3	1.85943
Nup98	0.013846	0.864579	362	1	1.85868
C330018D20Rik	0.013898	0.864579	363	2	1.85705
Snrpa	0.013949	0.864579	364	1	1.85546
Ssr4	0.013958	0.864579	365	3	1.85518
Olfr1532-ps1	0.014008	0.864579	366	3	1.85362
Kif14	0.014052	0.864579	367	1	1.85226
V1rd18	0.014215	0.864579	368	1	1.84725
Tcf7l1	0.014257	0.864579	369	2	1.84597
4930415L06Rik	0.014273	0.864579	370	3	1.84548
Eed	0.014274	0.864579	371	3	1.84545
Sec16b	0.014338	0.864579	372	2	1.84351
Bnip2	0.014376	0.864579	373	3	1.84236
Rad51ap1	0.014389	0.864579	374	2	1.84197
Gzmg	0.014435	0.864579	375	2	1.84058
Olfr552	0.014463	0.864579	376	3	1.83974
Meiob	0.014483	0.864579	377	2	1.83914
Mttp	0.014506	0.864579	378	3	1.83845
NonTargetingControlGuideForMouse_0791	0.014531	0.864579	379	1	1.8377
Magi2	0.014544	0.864579	380	3	1.83732
Mesp1	0.014559	0.864579	381	3	1.83687
Hs2st1	0.014601	0.864579	382	1	1.83562
Frk	0.014602	0.864579	383	3	1.83559
Stk40	0.014696	0.866774	384	3	1.8328
Clhc1	0.014716	0.866774	385	1	1.83221
Esco1	0.014826	0.866877	386	2	1.82898
mmu-mir-7087	0.014849	0.866877	387	1	1.8283
Ndufv2	0.014933	0.866877	388	3	1.82585
Slc25a22	0.014958	0.866877	389	2	1.82513
Prr3	0.014967	0.866877	390	2	1.82487
Sult2a1	0.014975	0.866877	391	2	1.82463
Lce1h	0.015025	0.866877	392	3	1.82319
Olfr1008	0.01505	0.866877	393	3	1.82246
Gm8898	0.015061	0.866877	394	1	1.82215
Fam194a	0.015167	0.869066	395	1	1.8191
Myadm	0.015255	0.869066	396	3	1.81659
Ces2h	0.015276	0.869066	397	1	1.81599
Engase	0.015277	0.869066	398	3	1.81596
NonTargetingControlGuideForMouse_0552	0.015291	0.869066	399	1	1.81556
Vmn1r88	0.015389	0.872413	400	1	1.81279
Cdh10	0.015437	0.872978	401	3	1.81144
Ing5	0.015489	0.873738	402	2	1.80998
Usp27x	0.015601	0.875891	403	2	1.80685
Jmjd1c	0.015661	0.875891	404	2	1.80518
mmu-mir-190a	0.015683	0.875891	405	3	1.80457
mmu-mir-29a	0.015745	0.875891	406	1	1.80286
Gpsm3	0.015839	0.875891	407	2	1.80027
Pdik1l	0.015857	0.875891	408	2	1.79978
Aup1	0.015978	0.875891	409	2	1.79648
Olfr1306	0.015996	0.875891	410	2	1.79599
Camk1d	0.015996	0.875891	411	2	1.79599
Slbp	0.016033	0.875891	412	3	1.79499
Pld5	0.016062	0.875891	413	3	1.7942
Col8a2	0.016101	0.875891	414	3	1.79315
Olfr741	0.016166	0.875891	415	3	1.7914
Olfr134	0.016171	0.875891	416	3	1.79126
Tsc2	0.016219	0.875891	417	3	1.78998
Setbp1	0.016281	0.875891	418	1	1.78832
Pdcd2l	0.016377	0.875891	419	2	1.78577
Lrrc28	0.016485	0.875891	420	2	1.78291
Olfr883	0.016496	0.875891	421	2	1.78262
Rybp	0.016569	0.875891	422	3	1.7807
Otos	0.016612	0.875891	423	3	1.77958
Gk5	0.016646	0.875891	424	1	1.77869
Bcmo1	0.016646	0.875891	425	1	1.77869
Fgf20	0.016663	0.875891	426	3	1.77825
Dpys	0.016734	0.875891	427	3	1.7764
Ypel3	0.016735	0.875891	428	2	1.77637
H2-DMb1	0.016768	0.875891	429	3	1.77552
Fcnb	0.01681	0.875891	430	1	1.77443
Rabl2	0.016821	0.875891	431	3	1.77415
Smim19	0.016869	0.875891	432	2	1.77291
Chek1	0.016882	0.875891	433	2	1.77258
Tbc1d7	0.016916	0.875891	434	2	1.7717
Stbd1	0.016925	0.875891	435	2	1.77147
Olfr1052	0.016942	0.875891	436	3	1.77104
Vmn1r79	0.016993	0.875891	437	2	1.76973
Arhgef5	0.01703	0.875891	438	2	1.76879
Psg16	0.017056	0.875891	439	2	1.76812
Zranb1	0.017134	0.875891	440	3	1.76614
Ddhd1	0.017157	0.875891	441	2	1.76556
1700016K19Rik	0.017174	0.875891	442	3	1.76513
Col14a1	0.017194	0.875891	443	3	1.76462
Krtap19-1	0.017286	0.875891	444	3	1.76231
Eif3e	0.017288	0.875891	445	1	1.76226
Kcnq3	0.017288	0.875891	446	1	1.76226
Sema4a	0.01731	0.875891	447	3	1.7617
Rnase1	0.017319	0.875891	448	3	1.76148
mmu-mir-1900	0.017403	0.875891	449	1	1.75938
Neu3	0.017416	0.875891	450	3	1.75905
Pou2f1	0.017453	0.875891	451	1	1.75813
Spock1	0.017462	0.875891	452	3	1.75791
Olfr187	0.017565	0.875891	453	2	1.75535
Thoc2	0.017614	0.875891	454	1	1.75414
Cinp	0.017614	0.875891	455	1	1.75414
Trim36	0.017629	0.875891	456	2	1.75377
Klf15	0.017651	0.875891	457	3	1.75323
Enpp4	0.017769	0.877587	458	2	1.75034
Vsig1	0.017783	0.877587	459	2	1.74999
Gpn1	0.017861	0.877587	460	3	1.74809
Nol6	0.017898	0.877587	461	2	1.7472
Ccdc166	0.017961	0.877587	462	2	1.74567
Eea1	0.017985	0.877587	463	1	1.74509
Ovgp1	0.018012	0.877587	464	3	1.74444
Raet1b	0.018016	0.877587	465	1	1.74434
Cyp4x1	0.018034	0.877587	466	2	1.74391
Rpl15	0.018088	0.878315	467	1	1.74261
Lce1g	0.018178	0.879636	468	2	1.74045
Gm12253	0.018192	0.879636	469	2	1.74012
Serpine3	0.018333	0.881324	470	2	1.73677
Tfdp1	0.018354	0.881324	471	1	1.73627
Cma2	0.018354	0.881324	472	2	1.73627
Mkx	0.018383	0.881324	473	2	1.73558
Zfp263	0.018515	0.884027	474	1	1.73248
Hddc2	0.018524	0.884027	475	3	1.73227
Rgs5	0.018556	0.884027	476	3	1.73152
Olfr533	0.018615	0.884692	477	2	1.73014
Strada	0.018683	0.884692	478	3	1.72855
Gm128	0.018687	0.884692	479	3	1.72846
Bet1	0.018777	0.887098	480	2	1.72637
Gm12657	0.018838	0.888115	481	2	1.72497
Fbxo7	0.018939	0.890956	482	2	1.72264
Ip6k1	0.018977	0.890956	483	3	1.72177
Mdga2	0.019187	0.896446	484	3	1.71699
Angptl7	0.019229	0.896446	485	2	1.71604
Tnfaip3	0.019251	0.896446	486	3	1.71555
Rdh5	0.019252	0.896446	487	3	1.71552
Olfr898	0.019457	0.901242	488	2	1.71092
Sidt2	0.019468	0.901242	489	2	1.71068
Olfr99	0.01948	0.901242	490	2	1.71041
D10Wsu102e	0.019514	0.901242	491	2	1.70965
Prss39	0.019632	0.90284	492	2	1.70704
Olfr1354	0.01966	0.90284	493	3	1.70642
St3gal6	0.019673	0.90284	494	1	1.70613
Pxk	0.019707	0.90284	495	3	1.70538
U2af1l4	0.019832	0.906729	496	2	1.70263
Ptprh	0.019947	0.906992	497	1	1.70012
Cep104	0.019955	0.906992	498	3	1.69995
Spo11	0.020056	0.906992	499	2	1.69776
Vmn1r229	0.020056	0.906992	500	1	1.69776
mmu-mir-16-2	0.020078	0.906992	501	1	1.69728
Tnik	0.020118	0.906992	502	3	1.69642
Synpo2l	0.020148	0.906992	503	2	1.69577
Spty2d1	0.020158	0.906992	504	3	1.69555
Aldoa	0.020275	0.907671	505	2	1.69304
Nudt12	0.020314	0.907671	506	3	1.6922
Tor1b	0.020384	0.907671	507	2	1.69071
Clec12a	0.020423	0.907671	508	2	1.68988
Tmem100	0.020423	0.907671	509	2	1.68988
6430550D23Rik	0.020423	0.907671	510	2	1.68988
Olfr694	0.020458	0.907671	511	3	1.68914
Gfi1b	0.020493	0.907671	512	1	1.68839
Zcchc3	0.02068	0.914162	513	3	1.68445
Ssr3	0.020723	0.914252	514	1	1.68355
mmu-mir-701	0.020844	0.914551	515	1	1.68102
Emx1	0.020875	0.914551	516	1	1.68037
Smpd2	0.020875	0.914551	517	1	1.68037
Tcerg1	0.020891	0.914551	518	3	1.68004
Ada	0.021036	0.918867	519	1	1.67704
Olfr774	0.021116	0.918867	520	2	1.67539
Mknk1	0.021142	0.918867	521	1	1.67485
Vwf	0.021159	0.918867	522	2	1.6745
Irx1	0.021236	0.918867	523	2	1.67293
Nqo2	0.021256	0.918867	524	3	1.67252
Nxph4	0.021403	0.918867	525	1	1.66953
Svop	0.021403	0.918867	526	2	1.66953
Olfr267	0.021472	0.918867	527	2	1.66813
Ctla4	0.021484	0.918867	528	3	1.66788
Gpr21	0.021492	0.918867	529	3	1.66772
Epha8	0.021598	0.918867	530	2	1.66559
Lrrc45	0.021643	0.918867	531	2	1.66468
Magi3	0.021686	0.918867	532	1	1.66382
Ube2m	0.021781	0.918867	533	3	1.66192
Gdf1	0.021788	0.918867	534	1	1.66178
Dmtf1	0.021818	0.918867	535	2	1.66119
Nupl2	0.021848	0.918867	536	2	1.66059
Hist2h2bb	0.021859	0.918867	537	2	1.66037
Ywhaz	0.021866	0.918867	538	3	1.66023
Bag2	0.021874	0.918867	539	3	1.66007
mmu-mir-6401	0.021881	0.918867	540	2	1.65993
Acoxl	0.022007	0.918867	541	1	1.65744
Zfp446	0.022049	0.918867	542	3	1.65661
Olfr1084	0.022063	0.918867	543	2	1.65634
Olfr786	0.022107	0.918867	544	1	1.65547
Arap3	0.022202	0.918867	545	2	1.65361
Sgcg	0.022224	0.918867	546	3	1.65318
Ccdc86	0.022271	0.918867	547	2	1.65226
Dact3	0.022305	0.918867	548	3	1.6516
Slc39a5	0.022369	0.918867	549	3	1.65035
Akt3	0.022376	0.918867	550	3	1.65022
Brpf1	0.022393	0.918867	551	3	1.64989
Tusc2	0.022403	0.918867	552	3	1.64969
Slc25a47	0.022407	0.918867	553	2	1.64962
Gyltl1b	0.022488	0.920188	554	2	1.64805
mmu-mir-128-2	0.02257	0.920188	555	1	1.64647
Dnajb6	0.022612	0.920188	556	1	1.64566
mmu-mir-7080	0.022638	0.920188	557	2	1.64516
Ascl5	0.022722	0.920188	558	3	1.64355
E230019M04Rik	0.022722	0.920188	559	3	1.64355
2010005H15Rik	0.022751	0.920188	560	1	1.643
Reep5	0.022775	0.920188	561	3	1.64254
Slc20a2	0.022834	0.920188	562	2	1.64142
Nrtn	0.022894	0.920188	563	2	1.64028
Clcn5	0.022903	0.920188	564	3	1.64011
Nox4	0.022927	0.920188	565	1	1.63965
Kcnrg	0.023033	0.921916	566	2	1.63765
Scamp5	0.023062	0.921916	567	3	1.6371
Olfr957	0.023092	0.921916	568	3	1.63654
Lin28a	0.023146	0.922471	569	3	1.63552
Pard3b	0.023222	0.922722	570	1	1.6341
Tmem167b	0.023236	0.922722	571	3	1.63384
Znhit2	0.023275	0.922722	572	2	1.63311
Col25a1	0.023335	0.923496	573	1	1.63199
Ptgs1	0.023444	0.924909	574	2	1.62997
Cited2	0.023454	0.924909	575	2	1.62978
Galp	0.023493	0.924909	576	2	1.62906
Krtap4-8	0.023554	0.925708	577	1	1.62794
Dppa3	0.023601	0.925726	578	2	1.62707
BC027072	0.02366	0.925726	579	1	1.62599
BC004004	0.023678	0.925726	580	2	1.62565
44079	0.023718	0.925726	581	3	1.62492
Erh	0.023766	0.926006	582	2	1.62404
NonTargetingControlGuideForMouse_0498	0.023852	0.927764	583	1	1.62248
Slc26a10	0.023946	0.929584	584	2	1.62077
Rfx1	0.023981	0.929584	585	1	1.62013
L1cam	0.02409	0.931044	586	1	1.61816
Abcc3	0.024187	0.931044	587	3	1.61642
mmu-mir-141	0.024246	0.931044	588	1	1.61536
Rad51ap2	0.024247	0.931044	589	2	1.61534
Bad	0.024305	0.931044	590	2	1.6143
Tdpoz4	0.02437	0.931044	591	3	1.61314
Eppk1	0.024441	0.931044	592	2	1.61188
Reln	0.024441	0.931044	593	1	1.61188
Ndufc2	0.024463	0.931044	594	3	1.61149
mmu-mir-6941	0.024511	0.931044	595	1	1.61064
Pla2g6	0.024512	0.931044	596	2	1.61062
Map4k1	0.02459	0.931044	597	1	1.60924
mmu-mir-7227	0.024638	0.931044	598	1	1.60839
Zfyve28	0.024687	0.931044	599	2	1.60753
Sntg1	0.024809	0.931044	600	3	1.60539
Olfr313	0.02485	0.931044	601	1	1.60467
Tcn2	0.02485	0.931044	602	1	1.60467
Rere	0.024881	0.931044	603	3	1.60413
Ccdc34	0.024946	0.931044	604	3	1.603
Erbb3	0.024994	0.931044	605	3	1.60216
Rnf133	0.025007	0.931044	606	2	1.60194
Olfr491	0.025075	0.931044	607	3	1.60076
Dnase1	0.025109	0.931044	608	3	1.60017
Lrrn4cl	0.025115	0.931044	609	1	1.60007
Ginm1	0.025116	0.931044	610	3	1.60005
Otub1	0.025156	0.931044	611	3	1.59936
Tcl1b3	0.025224	0.931044	612	2	1.59819
Hexdc	0.025227	0.931044	613	1	1.59813
Cript	0.025286	0.931044	614	2	1.59712
Elmo2	0.025318	0.931044	615	3	1.59657
Adcy4	0.025324	0.931044	616	1	1.59647
Ss18	0.025352	0.931044	617	2	1.59599
Tmeff1	0.025375	0.931044	618	3	1.59559
Llgl1	0.025416	0.931044	619	2	1.59489
Gpr27	0.025455	0.931044	620	3	1.59423
Cpne9	0.025583	0.931719	621	1	1.59205
Naip1	0.025642	0.931719	622	2	1.59105
Vmn1r34	0.025689	0.931719	623	3	1.59025
Tbc1d10b	0.025692	0.931719	624	2	1.5902
Fgb	0.025787	0.931719	625	3	1.5886
Sult3a1	0.025789	0.931719	626	1	1.58857
Vmn1r80	0.025789	0.931719	627	3	1.58857
4933422H20Rik	0.025811	0.931719	628	2	1.5882
Gtf2a1	0.025907	0.931719	629	3	1.58658
Klk1b8	0.025936	0.931719	630	3	1.5861
Olfr1198	0.025944	0.931719	631	1	1.58596
Gm3285	0.025967	0.931719	632	2	1.58558
Pirt	0.026047	0.933141	633	3	1.58424
Med14	0.026152	0.933527	634	2	1.5825
Olfr378	0.026239	0.933527	635	2	1.58105
Spc25	0.026306	0.933527	636	1	1.57995
Tsx	0.026306	0.933527	637	1	1.57995
Gpr125	0.026327	0.933527	638	2	1.5796
1700029J07Rik	0.026346	0.933527	639	3	1.57929
Rpl31	0.026388	0.933527	640	2	1.57859
Cxcl10	0.026456	0.933527	641	2	1.57748
BC018507	0.026566	0.933527	642	2	1.57567
Slc22a1	0.026611	0.933527	643	3	1.57494
Map3k12	0.026636	0.933527	644	3	1.57453
Hspa13	0.026642	0.933527	645	3	1.57443
Fam21	0.026661	0.933527	646	3	1.57412
Gm4847	0.026674	0.933527	647	2	1.57391
Slc16a11	0.026676	0.933527	648	2	1.57388
Adcy5	0.02687	0.937352	649	3	1.57073
Wscd1	0.026891	0.937352	650	3	1.57039
Ttll4	0.026941	0.937352	651	3	1.56959
Nars2	0.026982	0.937352	652	2	1.56893
0610007P14Rik	0.027039	0.937352	653	3	1.56801
Ganc	0.027063	0.937352	654	3	1.56762
Trerf1	0.027074	0.937352	655	2	1.56745
Flii	0.027208	0.938862	656	1	1.5653
Olfr1137	0.027313	0.938862	657	3	1.56363
Lum	0.027338	0.938862	658	3	1.56323
Ap5z1	0.027345	0.938862	659	2	1.56312
Brat1	0.027445	0.938862	660	2	1.56154
Vmn1r225	0.027447	0.938862	661	3	1.56151
Ppp1r21	0.027506	0.938862	662	2	1.56057
Vmn2r16	0.02752	0.938862	663	2	1.56035
Papln	0.027528	0.938862	664	1	1.56023
Depdc7	0.02754	0.938862	665	3	1.56004
Ctsq	0.027573	0.938862	666	2	1.55952
Neu2	0.027648	0.939179	667	3	1.55834
Sgol2	0.027666	0.939179	668	3	1.55805
Rtcb	0.02774	0.939614	669	2	1.55689
Ddx56	0.027814	0.939614	670	3	1.55574
Olfr193	0.027816	0.939614	671	2	1.55571
Wdr86	0.027844	0.939614	672	2	1.55527
Traf3ip2	0.02794	0.940278	673	1	1.55377
H2-Oa	0.027947	0.940278	674	2	1.55366
Cdc23	0.028039	0.941995	675	1	1.55224
AY761184	0.028118	0.943238	676	2	1.55102
Klf10	0.028308	0.943747	677	3	1.54809
Nxf1	0.028391	0.943747	678	1	1.54682
Clec2h	0.028391	0.943747	679	1	1.54682
Cyp3a16	0.028395	0.943747	680	2	1.54676
Fmnl3	0.028416	0.943747	681	2	1.54644
AI597468	0.028417	0.943747	682	3	1.54642
3110040N11Rik	0.028424	0.943747	683	3	1.54631
Kcnh2	0.028476	0.94409	684	2	1.54552
Defb6	0.028713	0.946118	685	2	1.54192
Ryr1	0.028752	0.946118	686	2	1.54133
Cstf3	0.028786	0.946118	687	3	1.54082
Npepps	0.028813	0.946118	688	1	1.54041
Asb18	0.028813	0.946118	689	1	1.54041
1700031F05Rik	0.028813	0.946118	690	1	1.54041
Tcl1b2	0.02883	0.946118	691	3	1.54016
Cd160	0.028974	0.947657	692	3	1.53799
Olfr367-ps	0.029036	0.947657	693	2	1.53706
Zfp868	0.029066	0.947657	694	1	1.53661
Lin9	0.029077	0.947657	695	2	1.53645
Abca5	0.029085	0.947657	696	3	1.53633
Crlf2	0.029205	0.948392	697	3	1.53454
Themis	0.029227	0.948392	698	2	1.53422
Zfp941	0.029233	0.948392	699	3	1.53413
Grm3	0.02929	0.948513	700	2	1.53328
Fastkd1	0.029374	0.948513	701	1	1.53204
NonTargetingControlGuideForMouse_0926	0.029379	0.948513	702	1	1.53196
Ccser1	0.029481	0.948513	703	1	1.53046
Ptpn3	0.029573	0.948513	704	3	1.5291
Gulp1	0.029619	0.948513	705	2	1.52843
Olfr1513	0.029643	0.948513	706	1	1.52808
Faah	0.029643	0.948513	707	1	1.52808
Kcnv2	0.029649	0.948513	708	3	1.52799
Pagr1a	0.029681	0.948513	709	2	1.52752
Sptan1	0.029708	0.948513	710	3	1.52713
Calr4	0.029778	0.948513	711	3	1.5261
BC030867	0.029781	0.948513	712	3	1.52606
Prkar1b	0.029846	0.948782	713	3	1.52511
Gykl1	0.029873	0.948782	714	2	1.52472
Hells	0.030066	0.950994	715	3	1.52192
Siah1b	0.030073	0.950994	716	3	1.52182
Nphp4	0.030092	0.950994	717	1	1.52155
Sdf2l1	0.030135	0.950994	718	3	1.52093
Glra1	0.03019	0.950994	719	1	1.52014
Magel2	0.030294	0.950994	720	3	1.51864
Krba1	0.030308	0.950994	721	2	1.51844
Hnrnpa1	0.030324	0.950994	722	3	1.51821
Noa1	0.030333	0.950994	723	2	1.51808
Fnbp1l	0.030368	0.950994	724	3	1.51758
Fam32a	0.030404	0.950994	725	2	1.51707
Srpx	0.030509	0.951792	726	3	1.51557
Vmn2r10	0.030563	0.951792	727	2	1.5148
44081	0.030593	0.951792	728	3	1.51438
Rpia	0.030597	0.951792	729	1	1.51432
Nfatc3	0.030697	0.952201	730	1	1.5129
Dock7	0.030711	0.952201	731	2	1.51271
Morn5	0.030738	0.952201	732	2	1.51232
Prkcdbp	0.030803	0.952201	733	2	1.51141
NonTargetingControlGuideForMouse_0201	0.03082	0.952201	734	1	1.51117
Minpp1	0.030925	0.954125	735	3	1.50969
Ccdc83	0.030986	0.954129	736	3	1.50883
Sv2a	0.031009	0.954129	737	1	1.50851
Darc	0.031089	0.954668	738	2	1.50739
Rp1	0.031111	0.954668	739	1	1.50709
Cebpb	0.031211	0.954865	740	2	1.50569
NonTargetingControlGuideForMouse_0799	0.03122	0.954865	741	1	1.50557
Olfr45	0.031244	0.954865	742	2	1.50523
Cnksr1	0.031296	0.955179	743	2	1.50451
Ldhd	0.031416	0.956784	744	3	1.50285
Tcp11	0.031436	0.956784	745	3	1.50257
Jmjd4	0.031499	0.956784	746	2	1.5017
Pla2r1	0.031517	0.956784	747	3	1.50146
Gm14151	0.031649	0.95883	748	2	1.49964
Lzic	0.031669	0.95883	749	2	1.49937
Megf10	0.031829	0.96012	750	2	1.49718
Rnf38	0.031867	0.96012	751	3	1.49666
Fbxw17	0.031926	0.96012	752	2	1.49586
Plek2	0.031936	0.96012	753	3	1.49572
Cenpa	0.032041	0.96012	754	1	1.49429
Slc35c1	0.032056	0.96012	755	2	1.49409
Vmn2r104	0.0322	0.96012	756	3	1.49214
Lep	0.032244	0.96012	757	2	1.49155
Rras	0.032324	0.96012	758	3	1.49047
Robo3	0.032338	0.96012	759	1	1.49029
Ccr5	0.032358	0.96012	760	3	1.49002
Auts2	0.032412	0.96012	761	3	1.48929
Creb3l1	0.032438	0.96012	762	2	1.48895
Slc44a4	0.032478	0.96012	763	3	1.48841
Chat	0.032539	0.96012	764	1	1.4876
Olfr322	0.032549	0.96012	765	2	1.48746
B3galt6	0.032582	0.96012	766	3	1.48702
Dhx29	0.032643	0.96012	767	2	1.48621
Timm8a2	0.032745	0.96012	768	1	1.48486
Olfr1228	0.032746	0.96012	769	3	1.48484
Myl6b	0.03283	0.96012	770	3	1.48373
Sh3glb2	0.032902	0.96012	771	3	1.48278
Gdf11	0.032949	0.96012	772	1	1.48216
Cyfip1	0.032967	0.96012	773	2	1.48192
Trim35	0.033037	0.96012	774	3	1.481
Htra1	0.033057	0.96012	775	2	1.48074
Blvrb	0.033083	0.96012	776	3	1.4804
Cdkl5	0.033084	0.96012	777	2	1.48038
Aldh3b1	0.033093	0.96012	778	3	1.48026
Ncapd3	0.033204	0.96012	779	1	1.47881
Ptges3l	0.033204	0.96012	780	1	1.47881
NonTargetingControlGuideForMouse_0210	0.033273	0.96012	781	1	1.47791
2610524H06Rik	0.033367	0.96012	782	1	1.47668
Scel	0.033444	0.96012	783	3	1.47568
Dopey2	0.033458	0.96012	784	2	1.4755
Kcnc3	0.033465	0.96012	785	2	1.47541
Gcgr	0.033491	0.96012	786	3	1.47507
Gm6880	0.033574	0.96012	787	2	1.474
Naip6	0.033579	0.96012	788	2	1.47393
Fam166b	0.033591	0.96012	789	2	1.47378
Rps15	0.033676	0.96012	790	1	1.47268
Tnrc18	0.033791	0.96012	791	3	1.4712
Dmrta1	0.033812	0.96012	792	3	1.47093
Slxl1	0.033868	0.96012	793	2	1.47021
Tcea1	0.033886	0.96012	794	2	1.46998
Bmpr1a	0.033892	0.96012	795	2	1.4699
Olfr1467	0.033973	0.96012	796	3	1.46887
Zfp768	0.033977	0.96012	797	1	1.46881
Pdzd2	0.034016	0.96012	798	2	1.46832
Ndufa8	0.03405	0.96012	799	2	1.46788
Slc10a2	0.03407	0.96012	800	3	1.46763
Smad5	0.034078	0.96012	801	3	1.46753
Smc5	0.034086	0.96012	802	1	1.46742
Myo18b	0.034112	0.96012	803	3	1.46709
Adat1	0.034135	0.96012	804	2	1.4668
Arhgef6	0.03415	0.96012	805	3	1.46661
Etohi1	0.034158	0.96012	806	1	1.46651
mmu-mir-542	0.034168	0.96012	807	2	1.46638
C77080	0.034274	0.960255	808	3	1.46504
Glrx3	0.034299	0.960255	809	2	1.46472
Tcf7	0.034299	0.960255	810	2	1.46472
Tmco3	0.034431	0.960644	811	2	1.46305
Nkx2-4	0.034499	0.960644	812	2	1.46219
Mtmr6	0.034595	0.960644	813	3	1.46099
Olfr172	0.034614	0.960644	814	3	1.46075
Tagap1	0.034633	0.960644	815	2	1.46051
Cep78	0.034709	0.960644	816	3	1.45956
Ndufb6	0.034711	0.960644	817	2	1.45953
Inip	0.034715	0.960644	818	1	1.45948
Arhgef39	0.034727	0.960644	819	3	1.45933
Lmbr1	0.034737	0.960644	820	2	1.45921
Olfr1231	0.034826	0.961934	821	2	1.4581
Zglp1	0.034927	0.963507	822	1	1.45684
Amfr	0.035013	0.963507	823	2	1.45577
Wnt7b	0.035034	0.963507	824	1	1.45551
Pak1	0.035117	0.963507	825	3	1.45448
Rad1	0.03513	0.963507	826	1	1.45432
Ptar1	0.035149	0.963507	827	2	1.45409
Plch1	0.035206	0.963507	828	3	1.45338
Btbd10	0.035223	0.963507	829	1	1.45317
Olfr6	0.035326	0.963614	830	1	1.45191
Ccdc122	0.035446	0.963614	831	1	1.45043
Slc39a7	0.035516	0.963614	832	2	1.44958
Prlhr	0.035539	0.963614	833	3	1.44929
Mum1l1	0.035544	0.963614	834	2	1.44923
Gm12794	0.03555	0.963614	835	1	1.44916
Gm9839	0.035655	0.963614	836	1	1.44788
Cblb	0.035692	0.963614	837	2	1.44743
Obp2a	0.035755	0.963614	838	1	1.44666
Ccne1	0.035808	0.963614	839	2	1.44602
Eya3	0.03591	0.963614	840	2	1.44478
Zfp654	0.035957	0.963614	841	1	1.44422
A1cf	0.035976	0.963614	842	3	1.44399
Cep135	0.03605	0.963614	843	3	1.44309
Olfr761	0.036108	0.963614	844	3	1.4424
Ube2q1	0.036117	0.963614	845	3	1.44229
Swsap1	0.036148	0.963614	846	1	1.44192
Vmn2r95	0.03621	0.963614	847	2	1.44117
Trim13	0.036234	0.963614	848	1	1.44088
Agpat3	0.036252	0.963614	849	3	1.44067
Myo7b	0.03626	0.963614	850	2	1.44057
Olfr390	0.036278	0.963614	851	3	1.44036
Tmsb4x	0.03629	0.963614	852	1	1.44021
Tmem184a	0.036318	0.963614	853	3	1.43988
Cs	0.036357	0.963614	854	2	1.43941
D10Bwg1379e	0.036381	0.963614	855	2	1.43913
Cubn	0.036399	0.963614	856	2	1.43891
Slx4ip	0.036416	0.963614	857	1	1.43871
Olfr350	0.036526	0.964576	858	2	1.4374
Mageb18	0.036561	0.964576	859	2	1.43698
Sc4mol	0.036587	0.964576	860	3	1.43667
Zfp46	0.036623	0.964576	861	2	1.43625
Arhgap9	0.036727	0.964783	862	2	1.43501
Uchl1	0.036833	0.964783	863	1	1.43376
Vegfa	0.036855	0.964783	864	2	1.4335
D630039A03Rik	0.036927	0.964783	865	2	1.43266
Gm12789	0.036941	0.964783	866	3	1.43249
Gstm7	0.037042	0.964783	867	2	1.43131
Phldb3	0.037058	0.964783	868	2	1.43112
Nphp3	0.037193	0.964783	869	2	1.42954
H1f0	0.037223	0.964783	870	3	1.42919
Krtap5-3	0.037227	0.964783	871	1	1.42914
Slco4c1	0.037291	0.964783	872	3	1.4284
Atxn10	0.03732	0.964783	873	3	1.42806
Lrrtm3	0.037359	0.964783	874	2	1.4276
Abl2	0.037389	0.964783	875	3	1.42726
Nfya	0.037403	0.964783	876	3	1.42709
Fip1l1	0.037418	0.964783	877	1	1.42692
Spint2	0.037529	0.964783	878	1	1.42563
Rnf186	0.037563	0.964783	879	3	1.42524
Fuca2	0.037601	0.964783	880	2	1.4248
Etnppl	0.037623	0.964783	881	3	1.42455
Zfp951	0.03763	0.964783	882	2	1.42447
Napa	0.037635	0.964783	883	3	1.42441
Zfp281	0.037735	0.964783	884	2	1.42326
Iqsec1	0.037788	0.964783	885	3	1.42265
Ace3	0.037806	0.964783	886	2	1.42244
Ptgdr	0.037817	0.964783	887	2	1.42231
Sp5	0.037844	0.964783	888	3	1.422
Aqr	0.03786	0.964783	889	2	1.42182
Ehd1	0.037915	0.964783	890	3	1.42119
Smarce1	0.038085	0.964783	891	3	1.41925
Eltd1	0.038094	0.964783	892	3	1.41914
Nyx	0.038135	0.964783	893	2	1.41868
Trim42	0.038197	0.964783	894	3	1.41797
9430015G10Rik	0.038249	0.964783	895	1	1.41738
Ctbp1	0.038289	0.964783	896	2	1.41693
Syne3	0.038374	0.964783	897	3	1.41596
Cplx1	0.038385	0.964783	898	3	1.41584
Pnma1	0.038386	0.964783	899	3	1.41583
Mllt3	0.038414	0.964783	900	2	1.41551
Kbtbd12	0.038424	0.964783	901	2	1.4154
Pnmal2	0.038431	0.964783	902	1	1.41532
Eif2b1	0.038535	0.964783	903	1	1.41414
Hadh	0.038545	0.964783	904	2	1.41403
Hcn2	0.038591	0.964783	905	2	1.41351
Skil	0.038642	0.964783	906	2	1.41294
Pcdhb1	0.038659	0.964783	907	3	1.41275
Abtb1	0.038687	0.964783	908	2	1.41243
Tceal3	0.038724	0.964783	909	1	1.41202
Iqcd	0.038727	0.964783	910	3	1.41199
S100a13	0.03878	0.964783	911	2	1.41139
Srm	0.038831	0.964783	912	1	1.41082
Pacsin2	0.038843	0.964783	913	3	1.41069
Mia	0.039039	0.966981	914	1	1.4085
H2-M3	0.039075	0.966981	915	2	1.4081
Fut8	0.039093	0.966981	916	2	1.4079
NonTargetingControlGuideForMouse_0632	0.039123	0.966981	917	1	1.40757
Smarcc1	0.039145	0.966981	918	2	1.40732
Ak5	0.039216	0.967348	919	3	1.40654
Gripap1	0.039263	0.967348	920	2	1.40602
Olfr476	0.039342	0.967348	921	1	1.40514
Ptms	0.039433	0.967348	922	3	1.40414
Gm21586	0.039443	0.967348	923	2	1.40403
Npas4	0.039449	0.967348	924	1	1.40396
Rae1	0.039458	0.967348	925	2	1.40386
Cdh4	0.03955	0.968538	926	1	1.40285
Nubp1	0.039768	0.971758	927	1	1.40047
Haus8	0.039871	0.971758	928	1	1.39934
Gmfb	0.039871	0.971758	929	3	1.39934
Lamtor5	0.039878	0.971758	930	3	1.39927
Nhlrc2	0.039931	0.971758	931	3	1.39869
Adi1	0.039938	0.971758	932	3	1.39861
Dbh	0.039999	0.972202	933	3	1.39795
Olfr93	0.040052	0.972433	934	2	1.39738
Themis3	0.04016	0.97303	935	3	1.39621
mmu-mir-717	0.040164	0.97303	936	1	1.39616
NonTargetingControlGuideForMouse_0540	0.040228	0.97303	937	1	1.39547
Tpm2	0.04026	0.97303	938	2	1.39513
Nlrc5	0.04032	0.97303	939	2	1.39448
Sin3a	0.040385	0.97303	940	2	1.39378
Pdlim5	0.040433	0.97303	941	3	1.39326
Cpm	0.040441	0.97303	942	2	1.39318
Lpar1	0.040565	0.97303	943	1	1.39185
Krtap16-3	0.040573	0.97303	944	3	1.39176
Ndc80	0.040618	0.97303	945	2	1.39128
Olfr808	0.040673	0.97303	946	2	1.39069
Phkb	0.040735	0.97303	947	3	1.39003
Cpsf2	0.040748	0.97303	948	2	1.38989
Pyroxd2	0.040776	0.97303	949	3	1.3896
Olfr43	0.040779	0.97303	950	1	1.38956
Fam170a	0.040806	0.97303	951	2	1.38928
Irx6	0.04098	0.976168	952	1	1.38743
Rgs18	0.041096	0.976814	953	2	1.3862
Krit1	0.041124	0.976814	954	2	1.3859
Stx19	0.041186	0.976814	955	3	1.38525
Hcfc1	0.041253	0.976814	956	2	1.38454
Polr2f	0.041253	0.976814	957	2	1.38454
Ccl24	0.041318	0.976814	958	3	1.38386
Mettl4	0.041342	0.976814	959	3	1.38361
Cpz	0.041401	0.976814	960	1	1.38299
Vash1	0.041422	0.976814	961	2	1.38277
Usb1	0.041505	0.976814	962	2	1.3819
Ino80c	0.041508	0.976814	963	1	1.38187
Spib	0.041524	0.976814	964	2	1.3817
mmu-mir-875	0.041606	0.977629	965	2	1.38084
Ninj2	0.041713	0.977629	966	1	1.37973
Trpc4	0.041816	0.977629	967	2	1.37866
mmu-mir-467a-1	0.041821	0.977629	968	1	1.37861
Cypt15	0.04184	0.977629	969	2	1.37841
Prkag3	0.041884	0.977629	970	2	1.37795
Olfr576	0.041884	0.977629	971	3	1.37795
Dgcr8	0.041913	0.977629	972	1	1.37765
Gramd1b	0.041947	0.977629	973	2	1.3773
Samd3	0.042121	0.980681	974	2	1.3755
Gbe1	0.042209	0.981365	975	1	1.37459
Vmn1r178	0.042255	0.981365	976	2	1.37412
Zfp652	0.042315	0.981365	977	3	1.37351
Zfp954	0.042346	0.981365	978	3	1.37319
Tex30	0.042413	0.981365	979	1	1.3725
Vamp3	0.042482	0.981365	980	3	1.3718
Emid1	0.042615	0.981365	981	1	1.37044
Olfr1164	0.042639	0.981365	982	3	1.37019
Srbd1	0.04269	0.981365	983	3	1.36967
L2hgdh	0.042721	0.981365	984	2	1.36936
Gpr126	0.042745	0.981365	985	2	1.36911
Pth2r	0.042814	0.981365	986	3	1.36841
Pop7	0.042825	0.981365	987	2	1.3683
Asphd2	0.042944	0.981365	988	3	1.3671
Rbm3	0.042965	0.981365	989	3	1.36689
Emilin3	0.042967	0.981365	990	2	1.36686
Zfp850	0.043115	0.981365	991	2	1.36537
Cnot1	0.043214	0.981365	992	2	1.36438
Vmn1r-ps103	0.043239	0.981365	993	3	1.36412
Ccr1	0.043317	0.981365	994	3	1.36334
Rps27a	0.043408	0.981365	995	2	1.36243
Taf8	0.043459	0.981365	996	3	1.36192
Pdhb	0.043507	0.981365	997	1	1.36144
Gata5	0.043538	0.981365	998	3	1.36113
Rhpn1	0.043598	0.981365	999	2	1.36053
Tm4sf20	0.043608	0.981365	1000	2	1.36043
Ncam1	0.043646	0.981365	1001	3	1.36006
Hck	0.043659	0.981365	1002	3	1.35993
Tbc1d25	0.0437	0.981365	1003	2	1.35952
Gm8439	0.043762	0.981365	1004	2	1.3589
Aif1l	0.043792	0.981365	1005	2	1.35861
Dkk1	0.043792	0.981365	1006	1	1.35861
Snip1	0.043827	0.981365	1007	3	1.35826
mmu-mir-466h	0.043847	0.981365	1008	1	1.35806
Fam111a	0.043856	0.981365	1009	3	1.35797
Rab33b	0.043889	0.981365	1010	2	1.35764
Lhx4	0.043993	0.981365	1011	3	1.35662
Zmynd11	0.044046	0.981365	1012	2	1.35609
Cnot6	0.044066	0.981365	1013	2	1.3559
Gart	0.044077	0.981365	1014	1	1.35579
Esp31	0.044148	0.981365	1015	2	1.35509
Ormdl2	0.044155	0.981365	1016	3	1.35502
Bbs9	0.044179	0.981365	1017	2	1.35478
Ctsk	0.044212	0.981365	1018	3	1.35446
Olfr136	0.044222	0.981365	1019	3	1.35436
Rec8	0.044268	0.981365	1020	3	1.35391
Csf3	0.044283	0.981365	1021	3	1.35376
Cav1	0.044327	0.981365	1022	3	1.35333
Brinp3	0.044376	0.981365	1023	2	1.35285
Rbms2	0.04439	0.981365	1024	3	1.35271
Stk35	0.044424	0.981365	1025	1	1.35238
Necab3	0.044519	0.981365	1026	2	1.35145
Arhgap40	0.04455	0.981365	1027	2	1.35115
Phldb2	0.044588	0.981365	1028	1	1.35078
Sp9	0.044692	0.981365	1029	2	1.34977
Slc7a13	0.044697	0.981365	1030	3	1.34972
Olfr1020	0.044782	0.981365	1031	2	1.3489
Il1f8	0.044867	0.981365	1032	3	1.34807
Nudt17	0.044891	0.981365	1033	2	1.34784
Taldo1	0.044949	0.981365	1034	3	1.34728
Cst3	0.044966	0.981365	1035	2	1.34712
Efnb3	0.04497	0.981365	1036	3	1.34708
Trio	0.045121	0.981365	1037	3	1.34562
Btbd11	0.045187	0.981365	1038	1	1.34499
Olfr829	0.04519	0.981365	1039	2	1.34496
Dxo	0.045194	0.981365	1040	3	1.34492
Pm20d1	0.04526	0.981365	1041	2	1.34429
Bloc1s5	0.045273	0.981365	1042	1	1.34416
Fbrs	0.04529	0.981365	1043	3	1.344
Olfr33	0.045359	0.981365	1044	3	1.34334
Tmbim1	0.045448	0.981365	1045	2	1.34249
Garem	0.045494	0.981365	1046	2	1.34205
Atp6v1c1	0.045732	0.981365	1047	2	1.33978
Zbtb8b	0.045814	0.981365	1048	3	1.339
Golga2	0.045846	0.981365	1049	1	1.3387
Atp6v0e	0.045854	0.981365	1050	2	1.33862
Olfr849	0.045854	0.981365	1051	2	1.33862
Olfr645	0.045947	0.981365	1052	2	1.33774
Fcgr3	0.046042	0.981365	1053	1	1.33685
Prdm15	0.046072	0.981365	1054	3	1.33656
Camta1	0.046122	0.981365	1055	2	1.33609
Ube2c	0.046135	0.981365	1056	1	1.33597
Mrgprx1	0.046219	0.981365	1057	3	1.33518
Spata6	0.046233	0.981365	1058	1	1.33505
Nfatc1	0.046266	0.981365	1059	2	1.33474
Ttc28	0.046332	0.981365	1060	1	1.33412
Tle1	0.046498	0.981365	1061	3	1.33257
Zfx	0.046505	0.981365	1062	3	1.3325
Adra1a	0.046523	0.981365	1063	3	1.33233
Dnajb13	0.046547	0.981365	1064	2	1.33211
Fgf2	0.046693	0.981365	1065	2	1.33075
Fam196b	0.046697	0.981365	1066	3	1.33071
Prr22	0.04671	0.981365	1067	2	1.33059
N4bp2l2	0.046713	0.981365	1068	2	1.33056
Olfr586	0.046726	0.981365	1069	2	1.33044
Tlr6	0.046813	0.981365	1070	2	1.32963
1700016C15Rik	0.046884	0.981365	1071	3	1.32898
mmu-mir-873b	0.046916	0.981365	1072	1	1.32868
mmu-mir-6970	0.046939	0.981365	1073	2	1.32847
Rab33a	0.046996	0.981365	1074	3	1.32794
Optn	0.047017	0.981365	1075	1	1.32775
Smpdl3a	0.047107	0.981365	1076	3	1.32691
Nacad	0.047116	0.981365	1077	2	1.32683
Cyp2c38	0.04731	0.981365	1078	3	1.32505
mmu-mir-3078	0.047421	0.981365	1079	1	1.32403
Trim52	0.047432	0.981365	1080	2	1.32393
Vamp7	0.047439	0.981365	1081	1	1.32386
Serpinb6d	0.047475	0.981365	1082	2	1.32354
Olfr1029	0.047513	0.981365	1083	2	1.32319
Fam184a	0.047583	0.981365	1084	3	1.32255
Zfp763	0.047624	0.981365	1085	3	1.32217
Trpd52l3	0.047652	0.981365	1086	2	1.32192
Mib2	0.047739	0.981365	1087	1	1.32113
Magi1	0.04778	0.981365	1088	2	1.32075
Sprr2b	0.04779	0.981365	1089	3	1.32066
Mapk8ip1	0.047815	0.981365	1090	2	1.32044
Mast4	0.04784	0.981365	1091	1	1.32021
Gbgt1	0.047958	0.981365	1092	2	1.31914
Pabpn1l	0.048052	0.981365	1093	1	1.31829
mmu-mir-32	0.048096	0.981365	1094	1	1.31789
Asna1	0.048113	0.981365	1095	2	1.31774
Amy1	0.048134	0.981365	1096	3	1.31755
Mast2	0.048146	0.981365	1097	1	1.31744
Acap1	0.048148	0.981365	1098	3	1.31742
Olfr1145	0.048231	0.981365	1099	3	1.31667
Spink10	0.048239	0.981365	1100	1	1.3166
mmu-mir-19b-2	0.048276	0.981365	1101	2	1.31627
Asprv1	0.048295	0.981365	1102	2	1.3161
Tmem150a	0.04833	0.981365	1103	1	1.31578
Gimap5	0.048435	0.981365	1104	2	1.31484
Igll1	0.048458	0.981365	1105	2	1.31463
Ccdc36	0.048473	0.981365	1106	3	1.3145
Olfr746	0.048714	0.981365	1107	3	1.31235
Fbxl20	0.048829	0.981365	1108	3	1.31132
Nrg3	0.048912	0.981365	1109	2	1.31058
Dgat1	0.048976	0.981365	1110	2	1.31002
Rangap1	0.049017	0.981365	1111	2	1.30965
Cpvl	0.049094	0.981365	1112	3	1.30897
Dync1i2	0.049114	0.981365	1113	1	1.30879
Olfr823	0.049161	0.981365	1114	2	1.30838
Flrt1	0.049332	0.981365	1115	1	1.30687
Olfr1226	0.049414	0.981365	1116	3	1.30615
Zmynd12	0.049424	0.981365	1117	3	1.30606
Tas2r123	0.049448	0.981365	1118	2	1.30585
Oosp3	0.04948	0.981365	1119	3	1.30557
Syce1l	0.049496	0.981365	1120	3	1.30543
Lilra6	0.049534	0.981365	1121	1	1.3051
Mettl25	0.049539	0.981365	1122	2	1.30505
Olfr1406	0.049542	0.981365	1123	3	1.30503
1600015I10Rik	0.049628	0.981365	1124	1	1.30427
4933403O08Rik	0.049754	0.981365	1125	3	1.30317
Atp6v0c	0.049757	0.981365	1126	2	1.30315
Sema3d	0.049785	0.981365	1127	3	1.3029
Slmo1	0.049833	0.981365	1128	1	1.30248
Stag1	0.049891	0.981365	1129	3	1.30198
Ccdc171	0.04993	0.981365	1130	1	1.30164
Hist1h3i	0.049952	0.981365	1131	1	1.30145
Tekt3	0.049978	0.981365	1132	3	1.30122
Olfr1209	0.049998	0.981365	1133	3	1.30105
Olfr374	0.05004	0.981365	1134	3	1.30068
Marcksl1	0.050057	0.981365	1135	3	1.30054
Cyp3a57	0.050116	0.981365	1136	2	1.30002
Tnfrsf23	0.050155	0.981365	1137	2	1.29969
Prdm11	0.050225	0.981365	1138	2	1.29908
Vmn1r227	0.050246	0.981365	1139	2	1.2989
NonTargetingControlGuideForMouse_0295	0.05033	0.981365	1140	1	1.29817
Apeh	0.050379	0.981365	1141	3	1.29775
Tradd	0.050414	0.981365	1142	1	1.29745
Slc1a5	0.050512	0.981365	1143	1	1.29661
Olfr959	0.050544	0.981365	1144	2	1.29633
Ly6g5b	0.05057	0.981365	1145	2	1.29611
Akr1c19	0.050589	0.981365	1146	3	1.29594
Ptp4a2	0.050598	0.981365	1147	2	1.29587
Sgk1	0.050608	0.981365	1148	2	1.29578
Rab1	0.050705	0.981365	1149	2	1.29495
Tmem134	0.050707	0.981365	1150	3	1.29493
Gm7120	0.050727	0.981365	1151	2	1.29476
Sh3bp5	0.050734	0.981365	1152	3	1.2947
Lgals12	0.050783	0.981365	1153	3	1.29428
Ppp6r3	0.05086	0.981365	1154	2	1.29362
Ado	0.050913	0.981365	1155	3	1.29317
Insig1	0.050914	0.981365	1156	1	1.29316
Krtap7-1	0.050928	0.981365	1157	2	1.29304
Rp1l1	0.051016	0.981365	1158	1	1.29229
Rab5b	0.051023	0.981365	1159	3	1.29223
Osbpl5	0.051229	0.981365	1160	2	1.29048
Zfy1	0.051281	0.981365	1161	2	1.29004
Olfr1273-ps	0.051333	0.981365	1162	2	1.2896
Gm7325	0.051344	0.981365	1163	3	1.28951
Mrgprb1	0.051436	0.981365	1164	2	1.28873
Tnfrsf19	0.051483	0.981365	1165	3	1.28834
Brcc3	0.0515	0.981365	1166	2	1.28819
1700065I17Rik	0.051517	0.981365	1167	2	1.28805
Npc1l1	0.051535	0.981365	1168	1	1.2879
Rundc3a	0.051633	0.981365	1169	1	1.28707
Cd63	0.051639	0.981365	1170	2	1.28702
Bcar1	0.051686	0.981365	1171	2	1.28663
Tial1	0.051726	0.981365	1172	1	1.28629
Lpin2	0.051759	0.981365	1173	3	1.28601
Rap1gds1	0.051798	0.981365	1174	3	1.28569
Dmtn	0.051823	0.981365	1175	1	1.28548
Klhl14	0.051865	0.981365	1176	3	1.28513
mmu-mir-7069	0.051881	0.981365	1177	1	1.28499
Zfp101	0.051881	0.981365	1178	3	1.28499
Gdpd5	0.051919	0.981365	1179	2	1.28467
Wdr77	0.051938	0.981365	1180	2	1.28451
Cdh24	0.05199	0.981365	1181	2	1.28408
Haus7	0.052012	0.981365	1182	3	1.2839
Mycl	0.052046	0.981365	1183	3	1.28361
Smok3b	0.052082	0.981365	1184	2	1.28331
Arhgef28	0.052102	0.981365	1185	2	1.28315
Gorasp2	0.052105	0.981365	1186	1	1.28312
Med8	0.052134	0.981365	1187	2	1.28288
Nts	0.052158	0.981365	1188	3	1.28268
Usp49	0.052214	0.981365	1189	2	1.28221
Ythdf3	0.052279	0.981365	1190	3	1.28167
Dmgdh	0.052292	0.981365	1191	1	1.28156
Olfr1335	0.052318	0.981365	1192	3	1.28135
N4bp2l1	0.052334	0.981365	1193	3	1.28122
Ep300	0.052364	0.981365	1194	3	1.28097
Trex2	0.052394	0.981365	1195	3	1.28072
Col6a5	0.052409	0.981365	1196	3	1.28059
Rnf145	0.052415	0.981365	1197	3	1.28054
Cyp8b1	0.052443	0.981365	1198	2	1.28031
Ireb2	0.052477	0.981365	1199	1	1.28003
Kmt2a	0.052482	0.981365	1200	3	1.27999
Rimkla	0.052568	0.981365	1201	1	1.27928
Atf3	0.052579	0.981365	1202	3	1.27919
NonTargetingControlGuideForMouse_0195	0.052603	0.981365	1203	1	1.27899
Aadacl2	0.05261	0.981365	1204	2	1.27893
Gm6812	0.052612	0.981365	1205	1	1.27892
Eps8l1	0.052656	0.981365	1206	3	1.27855
Slc11a1	0.05266	0.981365	1207	2	1.27852
Iqcf3	0.052764	0.981365	1208	2	1.27766
B430306N03Rik	0.052764	0.981365	1209	2	1.27766
Olfr541	0.052857	0.981365	1210	1	1.2769
mmu-mir-7222	0.052886	0.981365	1211	2	1.27666
Plekhm3	0.052905	0.981365	1212	3	1.2765
Arl5b	0.052929	0.981365	1213	2	1.27631
Rdh10	0.052948	0.981365	1214	3	1.27615
Gigyf1	0.052995	0.981365	1215	2	1.27577
Suz12	0.053045	0.981365	1216	2	1.27536
Vmn1r51	0.053137	0.981365	1217	1	1.2746
Slc9a4	0.053138	0.981365	1218	2	1.27459
Htatip2	0.053157	0.981365	1219	3	1.27444
Prtg	0.053222	0.981365	1220	1	1.27391
Rars	0.053252	0.981365	1221	3	1.27366
Trnau1ap	0.053308	0.981365	1222	2	1.27321
Rrm2	0.053322	0.981365	1223	1	1.27309
Grid2ip	0.053323	0.981365	1224	2	1.27309
Bhlhe22	0.053407	0.981365	1225	2	1.2724
Zcchc2	0.053419	0.981365	1226	1	1.2723
Pcdhga1	0.053435	0.981365	1227	1	1.27217
Duox1	0.053463	0.981365	1228	3	1.27195
Gigyf2	0.053535	0.981365	1229	1	1.27136
Hivep2	0.053578	0.981365	1230	3	1.27101
Mc1r	0.053593	0.981365	1231	2	1.27089
Mfsd7a	0.053622	0.981365	1232	1	1.27066
Smpx	0.053724	0.981365	1233	3	1.26983
Lrrc48	0.053746	0.981365	1234	3	1.26965
mmu-mir-8106	0.053753	0.981365	1235	2	1.2696
Exoc4	0.053756	0.981365	1236	2	1.26957
Lcn4	0.053796	0.981365	1237	3	1.26925
Mxra8	0.053825	0.981365	1238	1	1.26902
Eaf1	0.053902	0.981365	1239	2	1.2684
Ptbp3	0.054011	0.981365	1240	2	1.26752
Hnrnpm	0.054036	0.981365	1241	1	1.26732
Dnaja4	0.054045	0.981365	1242	3	1.26724
Lhfpl1	0.054089	0.981365	1243	3	1.26689
Rhoa	0.054128	0.981365	1244	3	1.26658
mmu-mir-1199	0.054132	0.981365	1245	1	1.26655
Zfp566	0.054135	0.981365	1246	3	1.26652
Polq	0.054147	0.981365	1247	3	1.26643
Asb10	0.054201	0.981365	1248	3	1.26599
Hsd17b7	0.05422	0.981365	1249	2	1.26584
Cdx4	0.054232	0.981365	1250	2	1.26574
Nhs	0.05424	0.981365	1251	2	1.26568
Fhl2	0.054261	0.981365	1252	2	1.26551
Exog	0.054326	0.981365	1253	1	1.26499
Olfr728	0.054331	0.981365	1254	3	1.26495
Olfr141	0.054427	0.981365	1255	2	1.26419
Gnb1l	0.054517	0.981365	1256	2	1.26347
Gprc5b	0.054521	0.981365	1257	1	1.26344
Prm1	0.054617	0.981365	1258	1	1.26267
Ifnar2	0.054625	0.981365	1259	3	1.26261
Sstr3	0.054721	0.981365	1260	2	1.26185
Uckl1	0.054817	0.981365	1261	1	1.26108
Olfr1489	0.054862	0.981365	1262	3	1.26073
Zc3h14	0.054876	0.981365	1263	2	1.26062
Ap3s1	0.054922	0.981365	1264	1	1.26025
Chrna7	0.054974	0.981365	1265	3	1.25984
Ambp	0.054989	0.981365	1266	3	1.25972
Olfr117	0.055014	0.981365	1267	1	1.25953
Ceacam5	0.05503	0.981365	1268	2	1.2594
Slc6a14	0.055108	0.981365	1269	2	1.25879
Zfp433	0.055123	0.981365	1270	3	1.25867
Pak6	0.055158	0.981365	1271	3	1.25839
4932418E24Rik	0.055166	0.981365	1272	3	1.25833
Pole	0.055209	0.981365	1273	1	1.25799
Heatr6	0.05525	0.981365	1274	2	1.25767
Foxl1	0.055287	0.981365	1275	2	1.25738
Cbwd1	0.055302	0.981365	1276	1	1.25726
Sema6c	0.055354	0.981365	1277	3	1.25685
Pex14	0.055405	0.981365	1278	1	1.25645
Il5	0.055485	0.981365	1279	3	1.25582
Rfxap	0.055503	0.981365	1280	1	1.25568
mmu-mir-6982	0.055504	0.981365	1281	1	1.25568
mmu-mir-219a-1	0.05555	0.981365	1282	2	1.25532
Slamf6	0.05556	0.981365	1283	3	1.25524
R3hdm4	0.055588	0.981365	1284	3	1.25502
Atp5k	0.055609	0.981365	1285	1	1.25485
Cmah	0.055662	0.981462	1286	2	1.25444
Tpgs2	0.05571	0.981462	1287	1	1.25407
Itih5	0.055746	0.981462	1288	2	1.25379
Kdelc2	0.05582	0.981462	1289	2	1.25321
Dnajc27	0.055981	0.981462	1290	2	1.25196
Prol1	0.056002	0.981462	1291	1	1.2518
Scgb1b2	0.056097	0.981462	1292	3	1.25106
Stard10	0.056104	0.981462	1293	1	1.25101
Cdc27	0.056199	0.981462	1294	2	1.25027
Slc25a44	0.056205	0.981462	1295	1	1.25023
Ints9	0.056216	0.981462	1296	2	1.25014
Krt33a	0.05627	0.981462	1297	3	1.24972
Chtop	0.056292	0.981462	1298	3	1.24955
Bend5	0.056301	0.981462	1299	1	1.24948
Afap1	0.056388	0.981462	1300	2	1.24881
Actrt3	0.056392	0.981462	1301	1	1.24878
Fuk	0.056423	0.981462	1302	2	1.24854
0610011F06Rik	0.056449	0.981462	1303	2	1.24834
Slc45a4	0.056528	0.981462	1304	3	1.24774
Creb5	0.056528	0.981462	1305	2	1.24774
Exoc7	0.056657	0.981462	1306	2	1.24675
Dusp10	0.056677	0.981462	1307	3	1.24659
Phkg2	0.056798	0.981462	1308	2	1.24567
mmu-mir-106b	0.056841	0.981462	1309	2	1.24534
Tyro3	0.056889	0.981462	1310	3	1.24497
Cr1l	0.056909	0.981462	1311	1	1.24482
Aasdh	0.056914	0.981462	1312	2	1.24478
Tmem245	0.056985	0.981462	1313	3	1.24424
Slc1a3	0.057039	0.981462	1314	2	1.24383
Cylc1	0.057057	0.981462	1315	2	1.24369
Ccdc115	0.057111	0.981462	1316	1	1.24328
Yes1	0.057152	0.981462	1317	3	1.24297
Ubr3	0.057185	0.981462	1318	3	1.24272
Brf2	0.057207	0.981462	1319	2	1.24255
Bhlhb9	0.057223	0.981462	1320	3	1.24243
Vmn2r2	0.057303	0.981462	1321	1	1.24182
Camta2	0.057355	0.981462	1322	2	1.24143
Mxd4	0.057469	0.981462	1323	3	1.24057
4933415F23Rik	0.057541	0.981462	1324	3	1.24002
Mal2	0.057596	0.981462	1325	3	1.23961
Narg2	0.057604	0.981462	1326	2	1.23955
Gpr56	0.057795	0.981462	1327	2	1.23811
44089	0.057802	0.981462	1328	1	1.23806
Lama4	0.057874	0.981462	1329	3	1.23752
Vwa5b1	0.057894	0.981462	1330	1	1.23737
Bora	0.057984	0.981462	1331	1	1.23669
Sh3d19	0.058082	0.981462	1332	2	1.23596
Klhdc10	0.058094	0.981462	1333	3	1.23587
Krt16	0.058165	0.981462	1334	2	1.23534
Tmem60	0.058188	0.981462	1335	1	1.23517
Krt27	0.058292	0.981462	1336	2	1.23439
5830473C10Rik	0.058332	0.981462	1337	2	1.23409
Ssty1	0.058366	0.981462	1338	1	1.23384
Gm11437	0.058415	0.981462	1339	3	1.23348
Frmpd1	0.058434	0.981462	1340	3	1.23333
Armc1	0.058481	0.981462	1341	2	1.23299
Slco5a1	0.058488	0.981462	1342	2	1.23293
Ppfia1	0.0585	0.981462	1343	2	1.23284
Fam195b	0.058524	0.981462	1344	3	1.23267
Igsf3	0.058558	0.981462	1345	2	1.23241
Col3a1	0.058587	0.981462	1346	1	1.2322
mmu-mir-3569	0.058774	0.981462	1347	1	1.23081
Fes	0.058804	0.981462	1348	1	1.23059
Lipi	0.058847	0.981462	1349	3	1.23028
Sox2	0.058917	0.981462	1350	3	1.22976
Anapc16	0.058938	0.981462	1351	3	1.2296
Bbox1	0.058996	0.981462	1352	2	1.22918
Snai2	0.059	0.981462	1353	1	1.22915
Myo5b	0.059109	0.981462	1354	1	1.22835
Yipf3	0.059229	0.981462	1355	2	1.22747
Klrg2	0.059277	0.981462	1356	2	1.22711
Wfdc15a	0.059299	0.981462	1357	1	1.22695
Myl2	0.05934	0.981462	1358	3	1.22665
Dyrk2	0.05937	0.981462	1359	2	1.22643
Bnip1	0.059385	0.981462	1360	2	1.22632
Atg14	0.059392	0.981462	1361	1	1.22627
Psmd10	0.059485	0.981462	1362	2	1.22559
Olfr235	0.059517	0.981462	1363	3	1.22536
Gm5136	0.05957	0.981462	1364	1	1.22497
Daglb	0.059606	0.981462	1365	3	1.22471
Cxcr3	0.059671	0.981462	1366	3	1.22424
Med29	0.059735	0.981462	1367	3	1.22377
Bbs2	0.059765	0.981462	1368	2	1.22355
Rhou	0.059765	0.981462	1369	2	1.22355
Ric3	0.059819	0.981462	1370	2	1.22316
Tia1	0.059826	0.981462	1371	3	1.22311
Sac3d1	0.059834	0.981462	1372	2	1.22305
Pink1	0.059854	0.981462	1373	1	1.22291
Rabl3	0.059933	0.981462	1374	1	1.22233
Olfr596	0.059983	0.981462	1375	2	1.22197
Dusp8	0.060038	0.981462	1376	1	1.22157
Mbd3l2	0.060075	0.981462	1377	2	1.22131
Adprm	0.060182	0.981462	1378	3	1.22053
Cdkn2c	0.060222	0.981462	1379	2	1.22024
Gabpb1	0.060289	0.981462	1380	3	1.21976
Olfr1166	0.060329	0.981462	1381	1	1.21947
Hormad1	0.06033	0.981462	1382	2	1.21947
Olfr77	0.060403	0.981462	1383	3	1.21894
Myo1c	0.060415	0.981462	1384	2	1.21886
Sash1	0.060435	0.981462	1385	3	1.21871
4930595M18Rik	0.060469	0.981462	1386	3	1.21847
3110007F17Rik	0.060524	0.981462	1387	1	1.21807
Braf	0.060547	0.981462	1388	3	1.21791
Olfr414	0.060622	0.981462	1389	2	1.21737
Pi15	0.060719	0.981462	1390	3	1.21668
Vangl2	0.060774	0.981462	1391	3	1.21628
Ptgfr	0.060826	0.981462	1392	3	1.21591
BC107364	0.060981	0.981462	1393	3	1.21481
4930526D03Rik	0.060987	0.981462	1394	3	1.21476
Olfr466	0.061022	0.981462	1395	1	1.21451
Gm20822	0.061105	0.981462	1396	3	1.21392
Robo4	0.061123	0.981462	1397	2	1.2138
NonTargetingControlGuideForMouse_0892	0.061183	0.981462	1398	1	1.21337
Fbxl17	0.06119	0.981462	1399	2	1.21332
Itgb1bp1	0.061224	0.981462	1400	1	1.21308
Cpn1	0.061246	0.981462	1401	3	1.21292
Limd1	0.061326	0.981462	1402	1	1.21236
Syngap1	0.061342	0.981462	1403	3	1.21224
Olfr683	0.061391	0.981462	1404	3	1.2119
Ppfibp1	0.061426	0.981462	1405	1	1.21165
Kif16b	0.061524	0.981462	1406	3	1.21096
Tada3	0.06156	0.981462	1407	3	1.2107
Olfr5	0.061573	0.981462	1408	2	1.21061
Ptpn20	0.061616	0.981462	1409	2	1.21031
Kcnv1	0.061623	0.981462	1410	1	1.21026
Gm14325	0.06163	0.981462	1411	2	1.21021
Spin1	0.061821	0.981462	1412	2	1.20886
Zbtb42	0.061831	0.981462	1413	3	1.20879
Ubc	0.061843	0.981462	1414	3	1.20871
mmu-mir-1249	0.061895	0.981462	1415	2	1.20834
Asmt	0.061905	0.981462	1416	2	1.20827
Opn1mw	0.061987	0.981462	1417	3	1.2077
Rbp7	0.062106	0.981462	1418	3	1.20687
Tsc1	0.062136	0.981462	1419	3	1.20666
Trim69	0.062158	0.981462	1420	2	1.2065
Lsm14b	0.062212	0.981462	1421	1	1.20613
Bag3	0.062252	0.981462	1422	3	1.20585
Trappc3l	0.062314	0.981462	1423	1	1.20541
Actr6	0.062327	0.981462	1424	3	1.20532
Gareml	0.062333	0.981462	1425	2	1.20528
Xxylt1	0.062348	0.981462	1426	3	1.20518
Jak2	0.062351	0.981462	1427	3	1.20516
Xrn2	0.062407	0.981462	1428	2	1.20477
Srsf5	0.062444	0.981462	1429	3	1.20451
Slc38a7	0.062485	0.981462	1430	3	1.20422
Fndc7	0.062614	0.981462	1431	3	1.20333
Polb	0.06269	0.981462	1432	1	1.2028
Cdh3	0.062762	0.981462	1433	2	1.2023
Chmp2a	0.062783	0.981462	1434	1	1.20216
Acsm3	0.062884	0.981462	1435	2	1.20146
Moap1	0.062947	0.981462	1436	2	1.20102
Tceal7	0.062978	0.981462	1437	1	1.20081
Tuba3a	0.062992	0.981462	1438	2	1.20071
Igbp1b	0.063014	0.981462	1439	3	1.20056
Syt1	0.06305	0.981462	1440	2	1.20031
Hrk	0.06314	0.981462	1441	2	1.1997
4930428D18Rik	0.063233	0.981462	1442	3	1.19906
Ndufb5	0.063264	0.981462	1443	1	1.19884
Shmt1	0.063284	0.981462	1444	2	1.19871
Dph1	0.063361	0.981462	1445	2	1.19818
Eif4g1	0.063431	0.981462	1446	3	1.1977
Olfr1076	0.063455	0.981462	1447	2	1.19753
Gna11	0.063462	0.981462	1448	1	1.19749
Smarcd1	0.063494	0.981462	1449	2	1.19727
Gm11554	0.06351	0.981462	1450	1	1.19716
Pex1	0.063649	0.981462	1451	2	1.19621
Vmn1r204	0.063657	0.981462	1452	2	1.19615
H60b	0.063673	0.981462	1453	2	1.19604
Rnf148	0.063693	0.981462	1454	3	1.19591
Olfr952	0.063705	0.981462	1455	3	1.19583
Olfr577	0.063745	0.981462	1456	1	1.19555
Ap1s1	0.063749	0.981462	1457	2	1.19553
Slc27a3	0.063848	0.981462	1458	2	1.19485
mmu-mir-6921	0.063926	0.981462	1459	2	1.19432
Stx3	0.06394	0.981462	1460	2	1.19423
mmu-mir-7683	0.063961	0.981462	1461	1	1.19408
Atp6v0a4	0.064035	0.981462	1462	1	1.19358
Far2	0.064083	0.981462	1463	3	1.19326
Ankrd55	0.064125	0.981462	1464	2	1.19297
Upb1	0.064134	0.981462	1465	1	1.19291
Psmf1	0.064154	0.981462	1466	3	1.19278
mmu-mir-3066	0.064173	0.981462	1467	2	1.19265
Pde7a	0.064223	0.981462	1468	2	1.19231
Adcy9	0.064249	0.981462	1469	2	1.19213
2700081O15Rik	0.064271	0.981462	1470	2	1.19198
Uri1	0.064326	0.981462	1471	1	1.19161
Enpp2	0.064347	0.981462	1472	3	1.19147
Bmyc	0.064427	0.981462	1473	2	1.19093
Cacna1h	0.064444	0.981462	1474	3	1.19082
Gm4884	0.06452	0.981462	1475	2	1.19031
Tbc1d19	0.064582	0.981462	1476	2	1.18989
Spns3	0.064656	0.981462	1477	2	1.18939
Tymp	0.06472	0.981462	1478	1	1.18896
Ctrc	0.064723	0.981462	1479	3	1.18894
Tmf1	0.064813	0.981462	1480	2	1.18834
Gfer	0.064817	0.981462	1481	2	1.18831
Dock5	0.06487	0.981462	1482	3	1.18796
Clec16a	0.064913	0.981462	1483	2	1.18767
Rtn4rl1	0.064916	0.981462	1484	1	1.18765
Olfr297	0.064989	0.981462	1485	3	1.18716
Tbx18	0.065011	0.981462	1486	2	1.18701
Glb1l	0.065079	0.981462	1487	3	1.18656
Olfr904	0.065126	0.981462	1488	1	1.18625
NonTargetingControlGuideForMouse_0993	0.065182	0.981462	1489	1	1.18587
Mcc	0.065216	0.981462	1490	2	1.18565
Zfp772	0.0653	0.981462	1491	3	1.18509
Ckmt2	0.065308	0.981462	1492	1	1.18503
Fggy	0.065415	0.981462	1493	3	1.18432
Kcnj8	0.065415	0.981462	1494	2	1.18432
Gm4070	0.065458	0.981462	1495	3	1.18404
Mvp	0.0657	0.981462	1496	1	1.18243
Hk1	0.065849	0.981462	1497	2	1.18145
Serpina1b	0.066049	0.981462	1498	2	1.18013
Cend1	0.066078	0.981462	1499	2	1.17994
Obsl1	0.066121	0.981462	1500	3	1.17966
Dact2	0.066177	0.981462	1501	1	1.17929
Fam196a	0.066271	0.981462	1502	2	1.17868
Tulp3	0.066287	0.981462	1503	3	1.17857
Cyp2c70	0.066332	0.981462	1504	2	1.17828
Ltb	0.066342	0.981462	1505	3	1.17821
Lypla1	0.066357	0.981462	1506	2	1.17811
Baiap2l2	0.066379	0.981462	1507	3	1.17797
Tmem219	0.066391	0.981462	1508	3	1.17789
Fzd1	0.066392	0.981462	1509	1	1.17788
44082	0.066439	0.981462	1510	3	1.17758
Olfr270	0.06648	0.981462	1511	3	1.17731
Rps9	0.066508	0.981462	1512	3	1.17713
Vti1b	0.066508	0.981462	1513	2	1.17713
Olfr1298	0.066567	0.981462	1514	3	1.17674
Psmc2	0.066598	0.981462	1515	2	1.17654
Cnga3	0.066626	0.981462	1516	3	1.17636
Pfdn2	0.066696	0.981462	1517	3	1.1759
Vmn1r207-ps	0.066697	0.981462	1518	1	1.17589
Fam122c	0.066991	0.981462	1519	3	1.17398
Usp28	0.067077	0.981462	1520	3	1.17343
Ttll11	0.067093	0.981462	1521	2	1.17332
mmu-mir-6377	0.067159	0.981462	1522	1	1.1729
Vps45	0.067252	0.981462	1523	3	1.17229
Cdkn2aip	0.067278	0.981462	1524	3	1.17213
Tmem56	0.067313	0.981462	1525	2	1.1719
Xdh	0.067348	0.981462	1526	2	1.17168
Fdxr	0.067441	0.981462	1527	2	1.17108
Smek1	0.067459	0.981462	1528	2	1.17096
Psph	0.067476	0.981462	1529	2	1.17085
Catsperd	0.067531	0.981462	1530	2	1.1705
Piwil4	0.067588	0.981462	1531	3	1.17013
Slc25a37	0.067626	0.981462	1532	3	1.16989
Gm15097	0.06766	0.981462	1533	2	1.16967
Copg2	0.067724	0.981462	1534	3	1.16926
Ugt3a1	0.067815	0.981462	1535	1	1.16867
Ccm2	0.067816	0.981462	1536	2	1.16867
Ndufc1	0.067913	0.981462	1537	1	1.16805
Krt77	0.067958	0.981462	1538	3	1.16776
Olfr1462	0.067965	0.981462	1539	2	1.16771
Apol7e	0.067973	0.981462	1540	3	1.16766
Ahi1	0.068061	0.981462	1541	3	1.1671
Ccdc106	0.068092	0.981462	1542	2	1.1669
Actr3	0.068221	0.981462	1543	3	1.16608
Rhob	0.068251	0.981462	1544	2	1.16589
Dpysl3	0.068286	0.981462	1545	2	1.16567
Gca	0.06834	0.981462	1546	3	1.16533
Dnaaf2	0.068341	0.981462	1547	2	1.16532
mmu-mir-299b	0.068365	0.981462	1548	1	1.16517
Stx17	0.068388	0.981462	1549	3	1.16502
Olfr510	0.068479	0.981462	1550	1	1.16444
Commd1	0.068485	0.981462	1551	2	1.1644
mmu-mir-9-1	0.06855	0.981462	1552	1	1.16399
Tenm4	0.068587	0.981462	1553	1	1.16376
Vmn1r8	0.068663	0.981462	1554	3	1.16328
Ccl6	0.068672	0.981462	1555	1	1.16322
Gm6583	0.068702	0.981462	1556	3	1.16303
Rps4x	0.068866	0.981462	1557	1	1.162
Znhit1	0.068866	0.981462	1558	1	1.162
Rccd1	0.068866	0.981462	1559	1	1.162
Car10	0.069017	0.981462	1560	3	1.16104
Sec24b	0.069067	0.981462	1561	1	1.16073
Ryk	0.069108	0.981462	1562	3	1.16047
NonTargetingControlGuideForMouse_0833	0.069127	0.981462	1563	1	1.16035
mmu-mir-7235	0.069174	0.981462	1564	2	1.16006
Csl	0.069192	0.981462	1565	3	1.15994
Rpl17	0.069329	0.981462	1566	1	1.15909
C77370	0.069355	0.981462	1567	2	1.15892
mmu-mir-370	0.069356	0.981462	1568	1	1.15892
Ivd	0.069415	0.981462	1569	1	1.15855
Scpep1	0.06952	0.981462	1570	2	1.15789
Fam71a	0.069605	0.981462	1571	3	1.15736
Prr5	0.069715	0.981462	1572	3	1.15667
Il9r	0.069727	0.981462	1573	3	1.1566
mmu-mir-343	0.069727	0.981462	1574	2	1.1566
Arhgap36	0.069877	0.981462	1575	2	1.15567
Vps33b	0.069946	0.981462	1576	3	1.15524
Agap2	0.069952	0.981462	1577	2	1.1552
Fblim1	0.069959	0.981462	1578	3	1.15516
Nploc4	0.070093	0.981462	1579	1	1.15433
Ppp3r2	0.070144	0.981462	1580	3	1.15401
Ifi27l2b	0.070188	0.981462	1581	1	1.15374
B2m	0.07019	0.981462	1582	2	1.15372
Cyb5d1	0.070236	0.981462	1583	3	1.15344
mmu-mir-721	0.070253	0.981462	1584	1	1.15334
Lipn	0.0703	0.981462	1585	2	1.15304
Anapc5	0.070338	0.981462	1586	3	1.15281
mmu-mir-7650	0.07039	0.981462	1587	1	1.15249
Fbxo46	0.070479	0.981462	1588	3	1.15194
Riiad1	0.070483	0.981462	1589	1	1.15192
NonTargetingControlGuideForMouse_0768	0.070577	0.981462	1590	1	1.15134
Zswim5	0.070578	0.981462	1591	1	1.15133
Pbx3	0.070643	0.981462	1592	3	1.15093
Art2b	0.070662	0.981462	1593	2	1.15081
Klra7	0.070667	0.981462	1594	2	1.15078
Trim8	0.070672	0.981462	1595	3	1.15075
Olfr1425	0.070673	0.981462	1596	2	1.15075
Adc	0.070696	0.981462	1597	3	1.15061
Slco6b1	0.070706	0.981462	1598	3	1.15054
Akr1e1	0.070728	0.981462	1599	2	1.15041
Lrrc57	0.070749	0.981462	1600	3	1.15028
Zbtb6	0.070774	0.981462	1601	1	1.15013
mmu-mir-384	0.070776	0.981462	1602	1	1.15011
Patl2	0.070786	0.981462	1603	2	1.15005
Vmn1r49	0.070837	0.981462	1604	3	1.14974
Gm5662	0.07086	0.981462	1605	1	1.1496
Ovol1	0.070954	0.981462	1606	3	1.14902
Mypop	0.070971	0.981462	1607	3	1.14892
Tnfsf9	0.071004	0.981462	1608	3	1.14872
A530032D15Rik	0.071052	0.981462	1609	1	1.14842
AY358078	0.07107	0.981462	1610	1	1.14831
Dbf4	0.071097	0.981462	1611	2	1.14815
Cpa1	0.071171	0.981462	1612	1	1.1477
Vmn1r20	0.07118	0.981462	1613	3	1.14764
Olfr312	0.071188	0.981462	1614	2	1.14759
Olfr65	0.071199	0.981462	1615	3	1.14753
Cox8c	0.071251	0.981462	1616	2	1.14721
Pcdhb3	0.07126	0.981462	1617	2	1.14715
Mcpt8	0.071339	0.981462	1618	3	1.14667
Csmd2os	0.07136	0.981462	1619	1	1.14655
Apold1	0.071464	0.981462	1620	3	1.14591
Vasn	0.071507	0.981462	1621	2	1.14565
Stam2	0.071639	0.981462	1622	2	1.14485
Hibch	0.071712	0.981462	1623	2	1.14441
Gpt2	0.071719	0.981462	1624	3	1.14437
Fsd1l	0.071728	0.981462	1625	3	1.14431
Arf1	0.07176	0.981462	1626	3	1.14412
Atp5o	0.07182	0.981462	1627	1	1.14375
mmu-mir-6355	0.071824	0.981462	1628	2	1.14373
Cnbd2	0.071829	0.981462	1629	3	1.1437
Plp2	0.071963	0.981462	1630	2	1.14289
Tcf20	0.072001	0.981462	1631	2	1.14266
Ankrd50	0.072099	0.981462	1632	1	1.14207
Tuba3b	0.072107	0.981462	1633	2	1.14202
Cxcl1	0.072145	0.981462	1634	3	1.14179
Rab27a	0.072191	0.981462	1635	1	1.14152
Ldlrad1	0.072234	0.981462	1636	3	1.14126
Rab11b	0.072328	0.981462	1637	2	1.14069
Tssk4	0.07239	0.981462	1638	1	1.14032
Zfp605	0.072452	0.981462	1639	3	1.13995
Polr3f	0.072473	0.981462	1640	1	1.13982
Cept1	0.072481	0.981462	1641	2	1.13978
S1pr5	0.07258	0.981462	1642	1	1.13918
Prpf4b	0.072659	0.981462	1643	2	1.13871
Zdhhc13	0.072688	0.981462	1644	2	1.13854
Kcnk12	0.072706	0.981462	1645	3	1.13843
Trib3	0.072793	0.981462	1646	2	1.13791
Klhl15	0.07282	0.981462	1647	3	1.13775
Aoc2	0.072882	0.981462	1648	2	1.13738
NonTargetingControlGuideForMouse_0022	0.072964	0.981462	1649	1	1.13689
Myoz2	0.072968	0.981462	1650	1	1.13687
Pramel6	0.073032	0.981462	1651	2	1.13649
Tex40	0.073065	0.981462	1652	2	1.13629
1700022I11Rik	0.07308	0.981462	1653	3	1.1362
Obscn	0.073161	0.981462	1654	1	1.13572
Fam198a	0.073189	0.981462	1655	3	1.13555
Dclk2	0.073249	0.981462	1656	1	1.1352
Glb1	0.07328	0.981462	1657	3	1.13501
Cypt2	0.073342	0.981462	1658	1	1.13465
Katnal2	0.073389	0.981462	1659	3	1.13437
Hspa4	0.073416	0.981462	1660	3	1.13421
Rslcan18	0.073499	0.981462	1661	3	1.13372
Gars	0.073535	0.981462	1662	1	1.13351
Mical1	0.073542	0.981462	1663	2	1.13346
Mmrn2	0.073554	0.981462	1664	3	1.13339
Whsc1l1	0.073649	0.981462	1665	2	1.13283
Klhl12	0.073692	0.981462	1666	3	1.13258
Enpep	0.073713	0.981462	1667	3	1.13246
Olfr412	0.073772	0.981462	1668	2	1.13211
Fam168b	0.073836	0.981462	1669	1	1.13173
Cckbr	0.073838	0.981462	1670	3	1.13172
Hmg20a	0.073882	0.981462	1671	2	1.13146
Pdf	0.073933	0.981462	1672	1	1.13116
Lace1	0.074022	0.981462	1673	1	1.13064
Abhd13	0.074037	0.981462	1674	2	1.13055
Gatsl3	0.074089	0.981462	1675	1	1.13025
Gnai1	0.074121	0.981462	1676	2	1.13006
Myo1d	0.074219	0.981462	1677	1	1.12948
Dll3	0.074299	0.981462	1678	2	1.12902
Irs3	0.074349	0.981462	1679	1	1.12872
Gbx2	0.074416	0.981462	1680	1	1.12833
Vps13c	0.074436	0.981462	1681	2	1.12822
Chit1	0.074468	0.981462	1682	2	1.12803
Rqcd1	0.074525	0.981462	1683	2	1.1277
Olfr1045	0.074527	0.981462	1684	2	1.12769
mmu-mir-26a-1	0.074584	0.981462	1685	1	1.12735
Trim14	0.074587	0.981462	1686	2	1.12734
Slc25a42	0.074592	0.981462	1687	2	1.12731
Crmp1	0.074626	0.981462	1688	2	1.12711
Ube2i	0.074659	0.981462	1689	1	1.12692
Nps	0.074711	0.981462	1690	2	1.12662
Arhgap10	0.074725	0.981462	1691	2	1.12653
Fgd1	0.074796	0.981462	1692	1	1.12612
Rbpms	0.074859	0.981462	1693	2	1.12576
NonTargetingControlGuideForMouse_0006	0.074896	0.981462	1694	1	1.12554
Ranbp2	0.074931	0.981462	1695	2	1.12534
Aldh4a1	0.074957	0.981462	1696	2	1.12519
Olfr827	0.074983	0.981462	1697	2	1.12504
Zfp810	0.074983	0.981462	1698	2	1.12504
Wbscr28	0.07502	0.981462	1699	2	1.12482
C1qtnf2	0.075043	0.981462	1700	2	1.12469
Tubb4a	0.075109	0.981462	1701	2	1.12431
Insm1	0.07517	0.981462	1702	1	1.12396
Defb28	0.075233	0.981462	1703	2	1.12359
Olfr1328	0.075303	0.981462	1704	2	1.12319
Olfr165	0.075357	0.981462	1705	2	1.12288
Col1a2	0.075377	0.981462	1706	2	1.12276
Nrl	0.075413	0.981462	1707	2	1.12255
Nit2	0.075428	0.981462	1708	1	1.12247
Kif18b	0.075552	0.981462	1709	1	1.12175
Muc20	0.07557	0.981462	1710	2	1.12165
NonTargetingControlGuideForMouse_0703	0.07558	0.981462	1711	1	1.12159
Cyb561d2	0.07562	0.981462	1712	2	1.12136
Ngdn	0.075751	0.981462	1713	2	1.12061
Ptger1	0.075755	0.981462	1714	2	1.12059
Tha1	0.075782	0.981462	1715	2	1.12043
mmu-mir-1962	0.075784	0.981462	1716	1	1.12042
Htr1a	0.075818	0.981462	1717	2	1.12023
NonTargetingControlGuideForMouse_0732	0.075941	0.981462	1718	1	1.11952
Olfr506	0.075999	0.981462	1719	1	1.11919
Uqcrfs1	0.076029	0.981462	1720	2	1.11902
Chmp1b	0.076056	0.981462	1721	1	1.11887
Ppp1cb	0.076108	0.981462	1722	1	1.11857
Tas2r108	0.076163	0.981462	1723	2	1.11826
Orai3	0.076172	0.981462	1724	1	1.1182
NonTargetingControlGuideForMouse_0619	0.076175	0.981462	1725	1	1.11819
Sptbn1	0.07619	0.981462	1726	2	1.1181
Tac2	0.076213	0.981462	1727	2	1.11797
Chrna3	0.076228	0.981462	1728	2	1.11789
Dmap1	0.076245	0.981462	1729	1	1.11779
Mapk6	0.076305	0.981462	1730	2	1.11745
Gfra2	0.076334	0.981462	1731	2	1.11728
Nrde2	0.07636	0.981462	1732	2	1.11713
Tceb3	0.076369	0.981462	1733	1	1.11708
Spata2	0.076401	0.981462	1734	2	1.1169
Rbbp8nl	0.076418	0.981462	1735	2	1.1168
Cdc20	0.07643	0.981462	1736	1	1.11674
Zfp955b	0.076475	0.981462	1737	2	1.11648
Abhd3	0.076559	0.981462	1738	2	1.116
Scimp	0.076602	0.981462	1739	2	1.11576
Capn11	0.076623	0.981462	1740	1	1.11564
Tmem199	0.076635	0.981462	1741	2	1.11557
Vgf	0.0767	0.981462	1742	2	1.1152
Anp32e	0.076798	0.981462	1743	2	1.11465
Otop1	0.076815	0.981462	1744	2	1.11455
Olfr583	0.076832	0.981462	1745	2	1.11446
Gm5916	0.076899	0.981462	1746	2	1.11408
mmu-mir-5621	0.076932	0.981462	1747	1	1.11389
Atrnl1	0.077016	0.981462	1748	2	1.11342
Zfp334	0.077077	0.981462	1749	1	1.11308
Bex2	0.077136	0.981462	1750	1	1.11274
Trim58	0.077315	0.981462	1751	1	1.11174
S100a11	0.077367	0.981462	1752	2	1.11144
Slc35e4	0.077384	0.981462	1753	1	1.11135
Wnt9a	0.07745	0.981462	1754	1	1.11098
Rhobtb3	0.077471	0.981462	1755	2	1.11086
mmu-mir-6928	0.077559	0.981462	1756	2	1.11037
Spryd3	0.077569	0.981462	1757	1	1.11031
Rela	0.077626	0.981462	1758	2	1.10999
Adal	0.077626	0.981462	1759	1	1.10999
Gpcpd1	0.077693	0.981462	1760	1	1.10962
Olfr1208	0.077755	0.981462	1761	1	1.10927
Paip2b	0.077771	0.981462	1762	2	1.10918
mmu-mir-6481	0.077838	0.981462	1763	1	1.10881
mmu-mir-5125	0.077882	0.981462	1764	2	1.10856
Tceal1	0.077968	0.981462	1765	2	1.10808
Pitpnb	0.078067	0.981462	1766	1	1.10753
Ppp6r2	0.078125	0.981462	1767	2	1.10721
Ctxn1	0.078128	0.981462	1768	2	1.10719
Rnf113a2	0.078249	0.981462	1769	2	1.10652
Kctd3	0.078265	0.981462	1770	2	1.10643
Prkaca	0.078279	0.981462	1771	2	1.10635
Taf12	0.078306	0.981462	1772	1	1.1062
Olfr1163	0.078495	0.981462	1773	2	1.10516
Olfr73	0.078604	0.981462	1774	2	1.10456
Klk7	0.078605	0.981462	1775	1	1.10455
Topaz1	0.078665	0.981462	1776	1	1.10422
Trappc9	0.078725	0.981462	1777	1	1.10389
Sympk	0.078877	0.981462	1778	1	1.10305
Vsx1	0.078954	0.981462	1779	2	1.10263
Atp1a4	0.078982	0.981462	1780	2	1.10247
Pkdrej	0.079104	0.981462	1781	2	1.1018
Acnat2	0.079184	0.981462	1782	2	1.10136
En2	0.079199	0.981462	1783	2	1.10128
Olfr873	0.079264	0.981462	1784	1	1.10092
Cdh11	0.079316	0.981462	1785	1	1.10064
Wnt7a	0.079376	0.981462	1786	1	1.10031
Appl1	0.079391	0.981462	1787	2	1.10023
Wdr16	0.079433	0.981462	1788	2	1.1
B9d1	0.079437	0.981462	1789	1	1.09998
Nhlh2	0.079494	0.981462	1790	1	1.09967
Rpl36al	0.07952	0.981462	1791	2	1.09952
Ccdc109b	0.079624	0.981462	1792	1	1.09896
Kiss1r	0.079677	0.981462	1793	2	1.09867
Stk25	0.07968	0.981462	1794	2	1.09865
Fam50a	0.079793	0.981462	1795	1	1.09804
Ldlrad3	0.079847	0.981462	1796	2	1.09774
Tomm20	0.079908	0.981462	1797	2	1.09741
Vdac2	0.079981	0.981462	1798	1	1.09701
mmu-mir-6402	0.079985	0.981462	1799	2	1.09699
Taf1	0.080008	0.981462	1800	2	1.09687
Slc25a36	0.080112	0.981462	1801	1	1.0963
Tmem207	0.080171	0.981462	1802	1	1.09598
Vmn1r201	0.080175	0.981462	1803	2	1.09596
Tgm4	0.080223	0.981462	1804	2	1.0957
Dnaaf3	0.080224	0.981462	1805	1	1.0957
Vmn1r175	0.080297	0.981462	1806	1	1.0953
C130079G13Rik	0.080302	0.981462	1807	2	1.09527
Klri2	0.080359	0.981462	1808	1	1.09497
4931417E11Rik	0.080489	0.981462	1809	2	1.09426
Spata31d1a	0.080539	0.981462	1810	1	1.09399
Tbx6	0.080608	0.981462	1811	2	1.09362
Olfr1449	0.080609	0.981462	1812	2	1.09362
Vmn2r66	0.080667	0.981462	1813	1	1.0933
mmu-mir-6931	0.080738	0.981462	1814	1	1.09292
Zfp365	0.08076	0.981462	1815	2	1.0928
Slc43a3	0.08079	0.981462	1816	1	1.09264
Serf1	0.080796	0.981462	1817	1	1.09261
Plcd4	0.080855	0.981462	1818	2	1.09229
Psat1	0.080979	0.981462	1819	1	1.09163
Spcs2	0.081037	0.981462	1820	1	1.09132
Brpf3	0.081084	0.981462	1821	2	1.09106
Tab3	0.081155	0.981462	1822	2	1.09068
Cdca8	0.081162	0.981462	1823	1	1.09065
Slco2a1	0.081223	0.981462	1824	1	1.09032
Amy2b	0.081287	0.981462	1825	2	1.08998
Npsr1	0.081342	0.981462	1826	1	1.08969
Dpm2	0.081391	0.981462	1827	2	1.08942
Bnc1	0.081406	0.981462	1828	1	1.08934
Ankrd7	0.08145	0.981462	1829	2	1.08911
Pabpc1l	0.08146	0.981462	1830	1	1.08906
Trmt5	0.081572	0.981462	1831	1	1.08846
Nrcam	0.08171	0.981462	1832	2	1.08772
Gcdh	0.081763	0.981462	1833	2	1.08744
Pcid2	0.081826	0.981462	1834	1	1.08711
Rora	0.08186	0.981462	1835	2	1.08693
mmu-mir-1943	0.081879	0.981462	1836	1	1.08683
Stat4	0.081891	0.981462	1837	1	1.08676
NonTargetingControlGuideForMouse_0148	0.081947	0.981462	1838	1	1.08647
Eml6	0.081957	0.981462	1839	1	1.08641
Edf1	0.082022	0.981462	1840	2	1.08607
mmu-mir-7670	0.082043	0.981462	1841	2	1.08596
Arid2	0.082075	0.981462	1842	2	1.08579
Tmem255a	0.082096	0.981462	1843	1	1.08568
Pcdh10	0.08218	0.981462	1844	2	1.08523
2310022A10Rik	0.082209	0.981462	1845	2	1.08508
Fev	0.082219	0.981462	1846	1	1.08503
Zfp131	0.082288	0.981462	1847	1	1.08466
Rbbp5	0.082356	0.981462	1848	1	1.0843
Tuba1b	0.082407	0.981462	1849	2	1.08404
Mpzl1	0.082422	0.981462	1850	1	1.08396
Rnd2	0.082492	0.981462	1851	1	1.08359
mmu-mir-6237	0.082501	0.981462	1852	2	1.08354
Exoc5	0.082504	0.981462	1853	2	1.08352
Tmem233	0.082557	0.981462	1854	1	1.08325
Tmem261	0.082716	0.981462	1855	2	1.08241
Cep192	0.082734	0.981462	1856	1	1.08232
Olfr1016	0.082758	0.981462	1857	2	1.08219
Scgb2b3	0.08278	0.981462	1858	2	1.08207
Mettl2	0.082791	0.981462	1859	1	1.08202
1110004E09Rik	0.082792	0.981462	1860	2	1.08201
Gsap	0.082851	0.981462	1861	2	1.0817
Gmcl1	0.082923	0.981462	1862	2	1.08132
Rpl31-ps12	0.082936	0.981462	1863	2	1.08126
Nck2	0.082987	0.981462	1864	1	1.08099
Cyp17a1	0.083049	0.981462	1865	2	1.08067
Olfr1193	0.083064	0.981462	1866	2	1.08059
AB124611	0.083092	0.981462	1867	2	1.08044
Cyp2a4	0.083114	0.981462	1868	1	1.08033
Mcpt2	0.083116	0.981462	1869	2	1.08032
Crlf3	0.083177	0.981462	1870	1	1.08
Dmpk	0.083184	0.981462	1871	2	1.07996
4931428F04Rik	0.083238	0.981462	1872	1	1.07968
Cpt1a	0.083243	0.981462	1873	2	1.07965
Pan2	0.083297	0.981462	1874	1	1.07937
Col18a1	0.083378	0.981462	1875	2	1.07895
Rhox6	0.083418	0.981462	1876	2	1.07874
Scn9a	0.083438	0.981462	1877	1	1.07864
Gm4461	0.083453	0.981462	1878	2	1.07856
Cmc1	0.0835	0.981462	1879	2	1.07831
Vmn1r12	0.083505	0.981462	1880	2	1.07829
Nhlrc4	0.083518	0.981462	1881	2	1.07822
Ubxn11	0.08353	0.981462	1882	2	1.07816
Usp11	0.08356	0.981462	1883	1	1.078
Nipal4	0.083618	0.981462	1884	1	1.0777
Snx29	0.083675	0.981462	1885	2	1.0774
Retnlg	0.08368	0.981462	1886	1	1.07738
Kynu	0.083733	0.981462	1887	2	1.0771
Gbf1	0.083778	0.981462	1888	2	1.07687
Loh12cr1	0.08386	0.981462	1889	2	1.07645
NonTargetingControlGuideForMouse_0081	0.083885	0.981462	1890	1	1.07632
Appbp2	0.083921	0.981462	1891	1	1.07613
Tas2r138	0.083954	0.981462	1892	2	1.07596
Slain1	0.083989	0.981462	1893	2	1.07578
Bptf	0.084057	0.981462	1894	2	1.07543
Gsg1	0.084061	0.981462	1895	2	1.07541
Mtx2	0.084178	0.981462	1896	2	1.0748
Olfr512	0.084184	0.981462	1897	1	1.07477
mmu-mir-211	0.08423	0.981462	1898	1	1.07453
Tmem104	0.084322	0.981462	1899	2	1.07406
Myrip	0.084334	0.981462	1900	2	1.074
Abcg2	0.084353	0.981462	1901	2	1.0739
C2cd4c	0.084393	0.981462	1902	1	1.07369
Itsn2	0.084405	0.981462	1903	2	1.07363
Tgtp2	0.084409	0.981462	1904	1	1.07361
Olfr1320	0.084535	0.981462	1905	2	1.07296
Oat	0.084727	0.981462	1906	1	1.07198
mmu-mir-376b	0.084804	0.981462	1907	1	1.07158
Eif2ak3	0.084904	0.981462	1908	1	1.07107
Cadm2	0.084967	0.981462	1909	1	1.07075
Pde6c	0.085033	0.981462	1910	1	1.07041
Dnajc28	0.085097	0.981462	1911	1	1.07009
Rxfp1	0.085171	0.981462	1912	2	1.06971
Wdr17	0.085269	0.981462	1913	1	1.06921
Zbtb46	0.085269	0.981462	1914	1	1.06921
Gm10318	0.08527	0.981462	1915	2	1.0692
Cenpq	0.085322	0.981462	1916	2	1.06894
Rax	0.085352	0.981462	1917	2	1.06879
Tssc1	0.085404	0.981462	1918	2	1.06852
Rad21	0.085419	0.981462	1919	1	1.06845
NonTargetingControlGuideForMouse_0059	0.085507	0.981462	1920	1	1.068
Nos1	0.085546	0.981462	1921	1	1.0678
2010001E11Rik	0.085604	0.981462	1922	1	1.06751
mmu-mir-1905	0.085649	0.981462	1923	1	1.06728
Mycbp	0.085663	0.981462	1924	1	1.06721
Ankmy2	0.085689	0.981462	1925	2	1.06707
Mrap2	0.085783	0.981462	1926	1	1.0666
Dgkb	0.085818	0.981462	1927	2	1.06642
Olfr658	0.08585	0.981462	1928	1	1.06626
Mex3d	0.085919	0.981462	1929	2	1.06591
Tmem136	0.08598	0.981462	1930	2	1.0656
Spag6	0.08604	0.981462	1931	1	1.0653
Tprg	0.086099	0.981462	1932	1	1.065
mmu-mir-6396	0.0861	0.981462	1933	2	1.065
Orai1	0.086127	0.981462	1934	2	1.06486
Aqp1	0.086158	0.981462	1935	2	1.0647
Gtf2i	0.086186	0.981462	1936	2	1.06456
Abcc9	0.086292	0.981462	1937	2	1.06403
Trim15	0.086308	0.981462	1938	2	1.06395
F830016B08Rik	0.086356	0.981462	1939	2	1.06371
Lama1	0.086375	0.981462	1940	2	1.06361
Olfr288	0.086409	0.981462	1941	1	1.06344
Fbxo28	0.086545	0.981462	1942	2	1.06276
Hist1h4f	0.086546	0.981462	1943	2	1.06275
Matn2	0.086596	0.981462	1944	1	1.0625
Zfp407	0.086661	0.981462	1945	1	1.06218
Fam49a	0.086682	0.981462	1946	2	1.06207
Cltc	0.086717	0.981462	1947	1	1.0619
Mstn	0.086728	0.981462	1948	2	1.06184
Olfr564	0.086757	0.981462	1949	2	1.0617
Gle1	0.086772	0.981462	1950	1	1.06162
Nemf	0.086897	0.981462	1951	1	1.061
Vstm4	0.086901	0.981462	1952	2	1.06098
Gata6	0.086959	0.981462	1953	2	1.06069
mmu-mir-125b-1	0.086967	0.981462	1954	1	1.06065
Ddx3x	0.087023	0.981462	1955	1	1.06037
Shc4	0.087034	0.981462	1956	2	1.06031
Nrip3	0.087055	0.981462	1957	2	1.06021
Apaf1	0.08707	0.981462	1958	2	1.06013
Slco2b1	0.087079	0.981462	1959	2	1.06009
Olfr149	0.087162	0.981462	1960	2	1.05967
Socs3	0.087241	0.981462	1961	2	1.05928
Mbd3	0.087274	0.981462	1962	1	1.05912
Kbtbd11	0.087286	0.981462	1963	2	1.05906
Cela3b	0.087336	0.981462	1964	1	1.05881
Myh9	0.087384	0.981462	1965	2	1.05857
Cda	0.087396	0.981462	1966	1	1.05851
Kcnk2	0.087468	0.981462	1967	1	1.05815
Gm2913	0.087491	0.981462	1968	1	1.05804
Pcgf1	0.087513	0.981462	1969	2	1.05793
Abcg5	0.087529	0.981462	1970	1	1.05785
Cep110	0.087582	0.981462	1971	1	1.05759
Kdelc1	0.087644	0.981462	1972	2	1.05728
Gdpd1	0.087704	0.981462	1973	1	1.05698
Ankrd66	0.087716	0.981462	1974	2	1.05692
L3mbtl2	0.087745	0.981462	1975	2	1.05678
Scrib	0.087829	0.981462	1976	1	1.05636
Peli3	0.08791	0.981462	1977	2	1.05596
Bin2	0.087953	0.981462	1978	1	1.05575
Celsr1	0.087977	0.981462	1979	2	1.05563
Guca2a	0.088002	0.981462	1980	2	1.05551
Prkg1	0.088055	0.981462	1981	2	1.05525
Impa2	0.08809	0.981462	1982	2	1.05507
Ccdc58	0.08809	0.981462	1983	1	1.05507
NonTargetingControlGuideForMouse_0046	0.088091	0.981462	1984	1	1.05507
Klre1	0.088165	0.981462	1985	2	1.0547
Lpgat1	0.08818	0.981462	1986	2	1.05463
Chsy3	0.088195	0.981462	1987	2	1.05456
Ktn1	0.088239	0.981462	1988	2	1.05434
Lrfn5	0.08824	0.981462	1989	2	1.05433
Abcd2	0.088262	0.981462	1990	2	1.05423
Trmt112	0.088297	0.981462	1991	1	1.05405
Tnni1	0.088359	0.981462	1992	1	1.05375
Csdc2	0.088379	0.981462	1993	2	1.05365
Fkbp6	0.088413	0.981462	1994	2	1.05348
mmu-mir-3535	0.088414	0.981462	1995	2	1.05348
Phactr1	0.088427	0.981462	1996	1	1.05342
Plekhs1	0.088497	0.981462	1997	1	1.05307
mmu-mir-505	0.088512	0.981462	1998	2	1.053
Ncam2	0.088514	0.981462	1999	2	1.05299
[truncated: 20,678 more rows]
