# Supplementary material for: A Commander-independent function of COMMD3 in endosomal trafficking
Source: eLife. 2025 Aug 21;14:RP105264. doi: 10.7554/eLife.105264 (PMC12370252; doi:10.7554/eLife.105264)
Supplement: Figure 1—source data 2. [file elife-105264-fig1-data2.xlsx]

## Sheet: Preadipocyte Essential Screen
id	num	neg|p-value	neg|fdr	neg|rank	neg|goodsgrna	neg|lfc	pos|score	pos|p-value	pos|fdr	pos|rank	pos|goodsgrna	pos|lfc
Kif23	6	2.183e-07	0.000495	1	6	-7.1525	1	1	1	22678	0	-7.1525
Rps5	6	2.183e-07	0.000495	2	6	-4.3223	1	1	1	22677	0	-4.3223
Rpl18	6	2.183e-07	0.000495	3	6	-4.6169	1	1	1	22676	0	-4.6169
Cct8	6	2.183e-07	0.000495	4	6	-3.2964	1	1	1	22675	0	-3.2964
Rps24	6	2.183e-07	0.000495	5	6	-5.4521	0.99999	1	1	22635	0	-5.4521
Snrpd2	6	2.183e-07	0.000495	6	5	-4.5508	0.89353	0.90364	0.996666	20530	1	-4.5508
Rpl23a	6	2.183e-07	0.000495	7	6	-4.0018	1	1	1	22674	0	-4.0018
Rpl14	6	2.183e-07	0.000495	8	6	-4.7906	1	1	1	22673	0	-4.7906
Eif4a3	6	2.183e-07	0.000495	9	6	-3.2533	1	1	1	22672	0	-3.2533
Aldoa	6	2.183e-07	0.000495	10	6	-3.1926	1	1	1	22671	0	-3.1926
Rpp21	6	6.5489e-07	0.001238	11	5	-4.7176	0.94581	0.94592	1	21381	0	-4.7176
Rps19	6	6.5489e-07	0.001238	12	6	-7.0726	0.99933	0.99936	1	22499	0	-7.0726
Kif4	6	1.0915e-06	0.001456	13	6	-3.7544	1	1	1	22670	0	-3.7544
Rpl11	6	1.0915e-06	0.001456	14	6	-3.681	1	1	1	22669	0	-3.681
Rpl18a	6	1.0915e-06	0.001456	15	5	-4.9017	0.99869	0.9987	1	22469	0	-4.9017
Pabpn1	5	1.0915e-06	0.001456	16	5	-3.7518	1	1	1	22668	0	-3.7518
Rpl27	6	1.5281e-06	0.001733	17	6	-3.9494	0.99956	0.99958	1	22518	0	-3.9494
Rpl37a	6	1.5281e-06	0.001733	18	6	-2.8625	1	1	1	22667	0	-2.8625
Ftsj3	6	1.5281e-06	0.001733	19	6	-3.611	1	1	1	22666	0	-3.611
Csnk1a1	6	1.9647e-06	0.001782	20	6	-3.8806	1	1	1	22665	0	-3.8806
Nip7	6	1.9647e-06	0.001782	21	6	-2.922	1	1	1	22664	0	-2.922
Rpl7	6	1.9647e-06	0.001782	22	6	-4.213	1	1	1	22663	0	-4.213
Psmb1	6	1.9647e-06	0.001782	23	6	-3.3328	1	1	1	22662	0	-3.3328
Rpl26	6	1.9647e-06	0.001782	24	5	-5.9408	0.91289	0.91684	0.9987	20805	1	-5.9408
mmu-mir-3470a	4	1.0915e-06	0.001456	25	4	-5.6962	1	1	1	22661	0	-5.6962
Rps15a	6	2.8378e-06	0.002219	26	6	-3.3876	1	1	1	22660	0	-3.3876
Rps14	6	2.8378e-06	0.002219	27	5	-3.804	0.99418	0.9942	1	22311	0	-3.804
Cse1l	6	2.8378e-06	0.002219	28	6	-4.39	1	1	1	22659	0	-4.39
Rpl17	6	2.8378e-06	0.002219	29	5	-4.373	0.95738	0.9574	1	21597	0	-4.373
Atp5b	6	3.2744e-06	0.002475	30	6	-2.489	1	1	1	22658	0	-2.489
Rpl36	6	3.711e-06	0.002715	31	6	-2.8666	1	1	1	22657	0	-2.8666
Ssrp1	6	4.1476e-06	0.002939	32	6	-3.9189	1	1	1	22656	0	-3.9189
Mdn1	6	4.5842e-06	0.00315	33	6	-3.3686	1	1	1	22655	0	-3.3686
Rps13	6	5.0208e-06	0.003345	34	6	-3.0376	1	1	1	22654	0	-3.0376
Gtpbp4	6	5.4574e-06	0.003345	35	6	-3.2179	1	1	1	22653	0	-3.2179
Ercc2	6	5.4574e-06	0.003345	36	4	-3.5399	0.76608	0.84743	0.981477	19421	1	-3.5399
Rps4x	6	5.4574e-06	0.003345	37	6	-2.9838	1	1	1	22652	0	-2.9838
Sf3a1	6	6.3306e-06	0.003778	38	5	-5.2172	0.403	0.6211	0.945994	14348	1	-5.2172
Ube2l3	6	7.2037e-06	0.003897	39	6	-2.1663	1	1	1	22651	0	-2.1663
Slmo2	6	7.6403e-06	0.003897	40	6	-5.2034	0.9995	0.99952	1	22509	0	-5.2034
Rps7	6	7.6403e-06	0.003897	41	6	-3.315	1	1	1	22650	0	-3.315
Spc25	6	8.0769e-06	0.003897	42	4	-4.0374	0.56837	0.72463	0.960123	16898	1	-4.0374
Lsm7	6	8.0769e-06	0.003897	43	6	-3.2315	1	1	1	22637	0	-3.2315
C330021F23Rik	6	8.0769e-06	0.003897	44	4	-4.6752	0.77408	0.8501	0.982602	19464	1	-4.6752
Ncbp1	6	8.0769e-06	0.003897	45	6	-4.4866	1	1	1	22649	0	-4.4866
Nhp2l1	6	8.0769e-06	0.003897	46	6	-3.0335	0.99985	0.99986	1	22564	0	-3.0335
Pcna	6	8.5135e-06	0.00394	47	5	-3.2823	0.68877	0.80918	0.972197	18684	1	-3.2823
Toe1	6	1.026e-05	0.004653	48	6	-2.3684	1	1	1	22648	0	-2.3684
Mars	6	1.0696e-05	0.004665	49	6	-3.6383	1	1	1	22647	0	-3.6383
Rpl27a	6	1.0696e-05	0.004665	50	4	-4.6582	0.96808	0.96809	1	21800	0	-4.6582
Phb2	6	1.157e-05	0.00495	51	6	-3.085	1	1	1	22646	0	-3.085
Spin2-ps1	5	8.0769e-06	0.003897	52	5	-2.2722	1	1	1	22645	0	-2.2722
Sars	6	1.2443e-05	0.005226	53	5	-3.6786	0.9895	0.98954	1	22198	0	-3.6786
Rpl28	6	1.2879e-05	0.005311	54	6	-2.7317	1	1	1	22644	0	-2.7317
Polr3k	6	1.3316e-05	0.005377	55	5	-2.7383	0.99884	0.99883	1	22477	0	-2.7383
Kat8	6	1.3753e-05	0.005377	56	6	-2.2312	1	1	1	22643	0	-2.2312
Hnrnpu	6	1.3753e-05	0.005377	57	6	-3.3899	1	1	1	22642	0	-3.3899
Bud31	6	1.5062e-05	0.005693	58	6	-3.388	1	1	1	22641	0	-3.388
Rpl13a	6	1.5062e-05	0.005693	59	5	-3.2036	0.99758	0.99761	1	22424	0	-3.2036
Rpl9	6	1.6809e-05	0.006249	60	5	-3.0979	0.97857	0.97867	1	22025	0	-3.0979
Fau	6	1.8118e-05	0.006627	61	4	-4.9362	0.32608	0.53961	0.945946	12297	1	-4.9362
Tprkb	6	2.0738e-05	0.007348	62	5	-3.4382	0.9939	0.99392	1	22305	0	-3.4382
Hcfc1	6	2.0738e-05	0.007348	63	5	-3.0152	0.32169	0.53476	0.945946	12163	1	-3.0152
Rpl32	6	2.1611e-05	0.00754	64	6	-2.7607	1	1	1	22640	0	-2.7607
Rpl23	6	2.2921e-05	0.007876	65	6	-4.0662	0.99997	0.99998	1	22605	0	-4.0662
Rps20	6	2.3794e-05	0.008054	66	6	-4.3288	1	1	1	22638	0	-4.3288
Hnrnpk	6	2.5759e-05	0.008591	67	6	-5.5054	1	1	1	22639	0	-5.5054
Rtcb	6	2.7287e-05	0.008968	68	5	-2.4937	0.71261	0.82701	0.975619	19037	1	-2.4937
Nup160	6	3.2089e-05	0.01025	69	6	-2.9444	0.99998	0.99999	1	22612	0	-2.9444
Rpl19	6	3.3399e-05	0.010503	70	6	-5.1679	0.99998	0.99998	1	22608	0	-5.1679
Polr1c	6	3.3836e-05	0.010503	71	5	-2.8934	0.48201	0.66903	0.951174	15576	1	-2.8934
Cdk1	6	3.4272e-05	0.010503	72	6	-3.1359	1	1	1	22636	0	-3.1359
Srsf1	6	3.4927e-05	0.010561	73	5	-3.8033	0.97757	0.97766	1	22001	0	-3.8033
Rps9	6	3.6892e-05	0.010865	74	5	-2.7408	0.88611	0.89907	0.9962	20431	1	-2.7408
Psmc5	6	3.6892e-05	0.010865	75	5	-3.9879	0.97285	0.97289	1	21907	0	-3.9879
Heatr1	6	3.7765e-05	0.01098	76	5	-4.0343	0.9988	0.9988	1	22476	0	-4.0343
Paf1	6	3.9293e-05	0.011139	77	5	-2.3864	0.92224	0.92415	0.99938	20967	1	-2.3864
Birc5	6	3.9948e-05	0.011154	78	6	-3.5742	0.99999	0.99999	1	22634	0	-3.5742
Bccip	6	4.0385e-05	0.011154	79	5	-3.1354	0.97166	0.97171	1	21882	0	-3.1354
Trmt112	6	4.0821e-05	0.011154	80	6	-3.6432	0.99965	0.99966	1	22532	0	-3.6432
Prpf8	6	4.1913e-05	0.011315	81	5	-3.9335	0.94706	0.94717	1	21402	0	-3.9335
Nop58	6	4.3004e-05	0.011474	82	6	-3.7448	0.99999	0.99999	1	22624	0	-3.7448
Tpt1	6	4.6933e-05	0.012376	83	5	-3.0777	0.99039	0.99041	1	22220	0	-3.0777
Psmb4	6	4.7807e-05	0.012404	84	6	-2.4098	0.99994	0.99994	1	22586	0	-2.4098
Rps15	6	4.868e-05	0.012404	85	5	-3.9268	0.99861	0.99862	1	22467	0	-3.9268
Ddx55	6	4.999e-05	0.012596	86	5	-3.7834	0.99448	0.99451	1	22318	0	-3.7834
Cdca8	6	5.2173e-05	0.013002	87	6	-4.4455	0.99996	0.99996	1	22593	0	-4.4455
Eif3m	6	5.3919e-05	0.013047	88	6	-2.3437	0.99999	0.99999	1	22633	0	-2.3437
Snrpb	6	5.4355e-05	0.013047	89	6	-2.3815	0.99999	0.99999	1	22632	0	-2.3815
Eef2	6	5.4792e-05	0.013047	90	5	-2.8744	0.99743	0.99746	1	22411	0	-2.8744
Rtel1	6	5.4792e-05	0.013047	91	6	-3.0004	0.99999	0.99999	1	22631	0	-3.0004
C130026I21Rik	4	3.1216e-05	0.010113	92	4	-2.8917	0.99999	0.99999	1	22630	0	-2.8917
Dbr1	6	5.6102e-05	0.013087	93	4	-4.1289	0.99551	0.99555	1	22342	0	-4.1289
Copg1	6	5.7412e-05	0.013087	94	6	-5.1787	0.99998	0.99998	1	22610	0	-5.1787
Pold3	6	5.7412e-05	0.013087	95	5	-2.7548	0.81126	0.86342	0.986215	19752	1	-2.7548
Snrpg	6	5.7848e-05	0.013087	96	6	-1.9183	0.99999	0.99999	1	22629	0	-1.9183
E030030I06Rik	6	5.8285e-05	0.013087	97	2	0.33591	0.10835	0.26429	0.945946	5174	3	0.33591
Abcb7	6	6.0904e-05	0.013541	98	6	-2.258	0.99999	0.99999	1	22628	0	-2.258
Eif2b5	6	6.1777e-05	0.013566	99	5	-3.0523	0.99839	0.99841	1	22458	0	-3.0523
Cebpz	6	6.2214e-05	0.013566	100	6	-2.1819	0.99999	0.99999	1	22627	0	-2.1819
Wdr77	5	3.8638e-05	0.011092	101	5	-1.812	0.99999	0.99999	1	22626	0	-1.812
Rpl24	6	6.4397e-05	0.013834	102	5	-4.0651	0.97531	0.9754	1	21948	0	-4.0651
Dhx33	6	6.4834e-05	0.013834	103	5	-2.806	0.93803	0.93828	1	21242	1	-2.806
Rpsa	6	6.527e-05	0.013834	104	4	-4.1509	0.96033	0.96034	1	21653	0	-4.1509
Rngtt	6	6.7017e-05	0.014072	105	5	-3.134	0.98545	0.98555	1	22142	0	-3.134
Cct4	6	6.8326e-05	0.014176	106	6	-2.663	0.9997	0.99971	1	22537	0	-2.663
Cdc20	6	6.8763e-05	0.014176	107	5	-2.8271	0.95819	0.95821	1	21608	0	-2.8271
Mob4	6	7.0509e-05	0.014238	108	6	-2.5845	0.99999	0.99999	1	22625	0	-2.5845
Rbbp4	6	7.0946e-05	0.014238	109	5	-2.644	0.9224	0.92429	0.99938	20969	1	-2.644
Plk1	6	7.7495e-05	0.015416	110	5	-3.6548	0.96775	0.96777	1	21791	0	-3.6548
Psmb6	6	8.0114e-05	0.015799	111	6	-2.5554	0.99999	0.99999	1	22623	0	-2.5554
Hist1h2br	1	8.5135e-06	0.00394	112	1	-9.838	0.99999	0.99999	1	22622	0	-9.838
Ptpmt1	6	8.3607e-05	0.016345	113	3	-3.1509	0.49013	0.67407	0.951312	15720	2	-3.1509
Tsr1	5	4.868e-05	0.012404	114	5	-1.9899	0.99999	0.99999	1	22621	0	-1.9899
Rpl8	6	8.579e-05	0.016625	115	6	-2.5985	0.99999	0.99999	1	22620	0	-2.5985
Mms22l	6	8.7536e-05	0.016625	116	4	-3.8765	0.96992	0.96994	1	21842	0	-3.8765
Ric8	6	8.7973e-05	0.016625	117	5	-2.2785	0.87561	0.89306	0.995171	20320	1	-2.2785
Ndufab1	6	8.9719e-05	0.016677	118	5	-2.478	0.72726	0.8356	0.977198	19210	1	-2.478
Mettl16	6	8.9719e-05	0.016677	119	5	-2.3165	0.94752	0.94766	1	21409	0	-2.3165
Rps23	5	5.5229e-05	0.013047	120	4	-5.2138	0.93816	0.93835	1	21247	0	-5.2138
Nup43	6	9.1029e-05	0.016783	121	5	-3.5936	0.92747	0.92857	0.999705	21057	1	-3.5936
Tomm5	6	9.4085e-05	0.017069	122	4	-3.5321	0.94198	0.94221	1	21313	0	-3.5321
Nelfb	6	9.4085e-05	0.017069	123	6	-3.4412	0.99965	0.99966	1	22531	0	-3.4412
Snrnp200	6	9.5832e-05	0.017236	124	6	-2.8771	0.99998	0.99999	1	22619	0	-2.8771
Gnl3	6	9.8451e-05	0.017236	125	6	-4.0263	0.99994	0.99995	1	22588	0	-4.0263
Eef1a1	6	9.8669e-05	0.017236	126	6	-2.1058	0.99996	0.99997	1	22598	0	-2.1058
Espl1	6	0.0001002	0.017236	127	6	-2.6162	0.99998	0.99999	1	22618	0	-2.6162
Rpl10	6	0.0001002	0.017236	128	5	-3.3597	0.99855	0.99856	1	22464	0	-3.3597
Psmg3	6	0.00010151	0.017236	129	5	-3.2387	0.99627	0.99632	1	22367	0	-3.2387
Snapc5	6	0.00010282	0.017236	130	5	-2.5209	0.99651	0.99655	1	22371	0	-2.5209
Atp6v0b	6	0.00010325	0.017236	131	6	-1.5684	0.99998	0.99999	1	22617	0	-1.5684
Tsr2	6	0.00010413	0.017236	132	6	-1.6793	0.99998	0.99999	1	22616	0	-1.6793
Brix1	6	0.00010413	0.017236	133	6	-2.333	0.99998	0.99999	1	22615	0	-2.333
Rpl6	6	0.00010413	0.017236	134	6	-2.5371	0.99998	0.99999	1	22614	0	-2.5371
Ppp4c	6	0.00010675	0.017413	135	5	-3.4806	0.96611	0.96612	1	21761	0	-3.4806
Polr2j	6	0.00010849	0.017413	136	5	-2.6134	0.98801	0.98803	1	22176	0	-2.6134
Tcp1	6	0.00010849	0.017413	137	6	-1.9994	0.99998	0.99999	1	22613	0	-1.9994
Slc25a26	6	0.00010937	0.017413	138	5	-3.1774	0.99747	0.99749	1	22413	0	-3.1774
Smc4	6	0.0001098	0.017413	139	5	-3.675	0.99754	0.99757	1	22417	0	-3.675
Rpl21	6	0.00011286	0.017774	140	5	-3.7739	0.99698	0.99703	1	22389	0	-3.7739
Bap1	6	0.00011373	0.017788	141	6	-2.2074	0.99933	0.99936	1	22498	0	-2.2074
Anapc1	6	0.00011941	0.01824	142	6	-2.4922	0.99998	0.99998	1	22611	0	-2.4922
Exosc7	6	0.00011941	0.01824	143	4	-3.538	0.64912	0.78024	0.96853	18096	2	-3.538
Rps12	6	0.00011941	0.01824	144	5	-3.8109	0.97608	0.97617	1	21967	0	-3.8109
Eif2s3x	6	0.00012246	0.018515	145	6	-3.5516	0.99997	0.99998	1	22604	0	-3.5516
Rps16	6	0.00012465	0.018597	146	5	-3.7066	0.98161	0.98173	1	22073	0	-3.7066
Uba2	6	0.00012465	0.018597	147	4	-3.5277	0.94076	0.941	1	21292	0	-3.5277
Ints7	6	0.00012552	0.018605	148	5	-3.781	0.94861	0.94875	1	21428	0	-3.781
Hist1h4m	5	8.6663e-05	0.016625	149	4	-3.6102	0.87195	0.87521	0.989351	20274	1	-3.6102
Denr	6	0.00012945	0.01894	150	4	-3.305	0.83031	0.87115	0.98787	19907	1	-3.305
Tamm41	6	0.00012945	0.01894	151	6	-2.1479	0.99998	0.99998	1	22609	0	-2.1479
Tbp	6	0.00013774	0.020012	152	5	-4.1788	0.99354	0.99356	1	22291	0	-4.1788
Rpl31	6	0.00013949	0.020012	153	6	-2.4419	0.99997	0.99998	1	22602	0	-2.4419
Vmn1r101	3	7.0946e-05	0.014238	154	3	-3.6418	0.99998	0.99998	1	22607	0	-3.6418
Rpl13	6	0.00014036	0.020012	155	5	-3.3527	0.99655	0.99658	1	22376	0	-3.3527
Rps27rt	5	0.00010151	0.017236	156	4	-3.0452	0.89288	0.8933	0.995248	20519	1	-3.0452
Vcp	6	0.00014255	0.020012	157	5	-3.2097	0.99604	0.99608	1	22359	0	-3.2097
U2af2	6	0.00014298	0.020012	158	5	-2.1212	0.99624	0.99629	1	22365	0	-2.1212
Thap11	6	0.00014386	0.020012	159	6	-1.2725	0.99997	0.99998	1	22606	0	-1.2725
Ddb1	6	0.00014429	0.020012	160	3	-3.1746	0.8395	0.87512	0.989351	19980	1	-3.1746
Smc6	6	0.00014473	0.020012	161	6	-2.6125	0.99992	0.99992	1	22581	0	-2.6125
Tuba1c	5	0.00010893	0.017413	162	4	-2.5617	0.4898	0.6438	0.949199	15713	1	-2.5617
E4f1	6	0.00015564	0.021136	163	6	-2.101	0.99996	0.99997	1	22597	0	-2.101
Nsa2	6	0.00015564	0.021136	164	5	-3.7991	0.98917	0.98919	1	22190	0	-3.7991
Kif11	6	0.00015783	0.021305	165	4	-3.295	0.94246	0.94267	1	21321	0	-3.295
Rrm2	6	0.00016307	0.02187	166	5	-3.9043	0.97307	0.97311	1	21909	0	-3.9043
Nfs1	6	0.00016787	0.022263	167	5	-2.4774	0.94563	0.94575	1	21377	0	-2.4774
Kntc1	6	0.00016918	0.022306	168	5	-2.3464	0.84796	0.879	0.990737	20059	1	-2.3464
Naa50	5	0.00011984	0.01824	169	2	-0.47933	0.81846	0.83832	0.978354	19809	1	-0.47933
Pop7	6	0.00017136	0.022463	170	6	-3.2531	0.99997	0.99998	1	22603	0	-3.2531
Traip	6	0.00017354	0.022546	171	5	-2.2062	0.99792	0.99793	1	22434	0	-2.2062
H2afz	6	0.00017398	0.022546	172	5	-3.0391	0.9271	0.92824	0.999705	21047	1	-3.0391
Cinp	6	0.00017507	0.022559	173	4	-3.8096	0.69896	0.81673	0.973699	18833	2	-3.8096
Rplp2	6	0.00017966	0.023018	174	4	-3.6657	0.83898	0.8749	0.989351	19975	1	-3.6657
Snrnp25	6	0.00018097	0.023056	175	6	-4.7498	0.99997	0.99997	1	22601	0	-4.7498
Myh9	6	0.00018271	0.023111	176	6	-3.1646	0.99957	0.99959	1	22522	0	-3.1646
Polr2g	6	0.00018359	0.023111	177	5	-3.9835	0.97055	0.97058	1	21856	0	-3.9835
Stx5a	6	0.00018446	0.023111	178	5	-3.1848	0.96494	0.96494	1	21743	0	-3.1848
Wrap53	6	0.00019101	0.0238	179	6	-2.2475	0.99997	0.99997	1	22600	0	-2.2475
Wee1	6	0.00019319	0.023896	180	5	-2.1757	0.99626	0.99631	1	22366	0	-2.1757
Rnasek	6	0.0001945	0.023896	181	4	-3.6207	0.85149	0.88067	0.991339	20087	1	-3.6207
Rabggtb	6	0.00019494	0.023896	182	6	-2.6125	0.99997	0.99997	1	22599	0	-2.6125
Rps27a	6	0.00019799	0.02414	183	5	-3.2443	0.99228	0.99229	1	22257	0	-3.2443
Dtymk	6	0.00020367	0.024543	184	5	-2.007	0.99526	0.9953	1	22335	0	-2.007
Rps8	6	0.00020454	0.024543	185	6	-2.6633	0.99985	0.99985	1	22562	0	-2.6633
Skiv2l2	6	0.00020804	0.024651	186	5	-3.1984	0.8805	0.89582	0.995555	20372	1	-3.1984
Topbp1	6	0.00020891	0.024651	187	6	-2.0876	0.99993	0.99994	1	22585	0	-2.0876
Phf5a	6	0.00020934	0.024651	188	5	-3.8598	0.96588	0.96588	1	21757	0	-3.8598
Cdc73	6	0.00021044	0.024651	189	5	-2.2265	0.94314	0.94331	1	21334	0	-2.2265
Rpain	6	0.00021109	0.024651	190	5	-4.5501	0.99162	0.99163	1	22246	0	-4.5501
Atp6v1b2	6	0.00021196	0.024651	191	5	-3.8198	0.81723	0.86578	0.98678	19796	1	-3.8198
Srp9	5	0.00016394	0.02187	192	5	-1.8771	0.99996	0.99997	1	22596	0	-1.8771
Rpl12	6	0.00022855	0.026046	193	6	-2.4487	0.99996	0.99997	1	22595	0	-2.4487
Npat	6	0.00023117	0.026082	194	5	-1.9556	0.96319	0.96321	1	21705	0	-1.9556
mmu-mir-6236	4	0.00014342	0.020012	195	3	-5.8169	0.65354	0.70753	0.957183	18167	1	-5.8169
Oip5	6	0.00023641	0.02646	196	5	-3.2353	0.59807	0.74464	0.963896	17316	1	-3.2353
Gm3701	4	0.0001456	0.020012	197	3	-4.4142	0.87344	0.87344	0.988933	20288	0	-4.4142
Rac1	6	0.00023685	0.02646	198	6	-2.3634	0.99996	0.99997	1	22594	0	-2.3634
Grb2	6	0.0002434	0.026795	199	5	-3.203	0.95522	0.95531	1	21556	0	-3.203
Psmc4	6	0.0002434	0.026795	200	6	-3.3012	0.99989	0.99989	1	22576	0	-3.3012
Dimt1	6	0.00025257	0.027537	201	4	-2.5691	0.95657	0.95662	1	21580	0	-2.5691
Lrr1	6	0.00025475	0.027642	202	5	-3.0746	0.038541	0.12222	0.945946	2198	1	-3.0746
Rps21	5	0.00020323	0.024543	203	5	-2.793	0.99995	0.99996	1	22592	0	-2.793
Tfrc	6	0.00027047	0.029208	204	6	-1.763	0.99995	0.99996	1	22591	0	-1.763
Lsm6	6	0.00027483	0.029446	205	5	-2.3158	0.99445	0.99447	1	22317	0	-2.3158
Rpl37	6	0.00027527	0.029446	206	5	-3.1169	0.96083	0.96087	1	21660	0	-3.1169
Rps18	6	0.00027789	0.029541	207	5	-3.0888	0.99864	0.99865	1	22468	0	-3.0888
Sf3b2	6	0.00027876	0.029541	208	6	-2.3478	0.99995	0.99995	1	22590	0	-2.3478
Rps17	5	0.00022419	0.025728	209	5	-4.1146	0.99756	0.99756	1	22423	0	-4.1146
Polr2h	5	0.00023074	0.026082	210	5	-3.3194	0.99986	0.99987	1	22566	0	-3.3194
Psmd13	6	0.00029623	0.030816	211	6	-3.0867	0.99929	0.99931	1	22493	0	-3.0867
Ahctf1	6	0.00029623	0.030816	212	5	-2.8742	0.94463	0.94477	1	21354	0	-2.8742
Exosc8	6	0.00030278	0.031353	213	5	-2.3038	0.99246	0.99246	1	22258	0	-2.3038
Psmb3	6	0.00031063	0.032021	214	4	-3.3264	0.96008	0.96008	1	21645	0	-3.3264
Psmd4	5	0.00025213	0.027537	215	5	-2.4526	0.99795	0.99796	1	22437	0	-2.4526
Usp7	6	0.00032068	0.032758	216	6	-2.799	0.99994	0.99995	1	22589	0	-2.799
Ubtf	6	0.00032417	0.032952	217	4	-1.6476	0.28841	0.49751	0.945946	11205	1	-1.6476
Bora	6	0.00032548	0.032952	218	6	-2.0542	0.99994	0.99995	1	22587	0	-2.0542
U2af1	6	0.00032853	0.033113	219	5	-2.1028	0.98996	0.98999	1	22213	0	-2.1028
Rpl10a	6	0.00033159	0.033127	220	5	-2.9655	0.94217	0.94238	1	21318	0	-2.9655
Dctn6	6	0.00033159	0.033127	221	5	-4.0183	0.57192	0.72701	0.960932	16941	1	-4.0183
mmu-mir-682	4	0.00022463	0.025728	222	3	-4.6084	0.18114	0.33187	0.945946	7890	1	-4.6084
Psmd3	6	0.00033727	0.033546	223	4	-3.8291	0.53579	0.70325	0.956816	16422	1	-3.8291
Ints9	6	0.00034469	0.034072	224	5	-2.5535	0.40053	0.61963	0.945994	14301	1	-2.5535
Dync1i2	6	0.00034556	0.034072	225	5	-2.1265	0.99044	0.99046	1	22222	0	-2.1265
mmu-mir-3471-1	4	0.00023816	0.026475	226	3	-4.7783	0.24592	0.39604	0.945946	9926	1	-4.7783
Psma4	6	0.00035691	0.035039	227	4	-2.9465	0.98129	0.98139	1	22067	0	-2.9465
Uso1	6	0.0003639	0.035571	228	5	-2.6166	0.88099	0.89611	0.995555	20378	1	-2.6166
Hyou1	6	0.00036608	0.035631	229	5	-2.6936	0.032412	0.10845	0.945946	1924	1	-2.6936
Ddx52	6	0.00037045	0.035902	230	4	-2.9221	0.88461	0.89819	0.9962	20413	1	-2.9221
Atad3a	6	0.00037656	0.036311	231	6	-2.2766	0.99953	0.99955	1	22516	0	-2.2766
Nxf1	6	0.00037787	0.036311	232	6	-2.9117	0.99943	0.99945	1	22506	0	-2.9117
Rps27	5	0.00031631	0.032458	233	5	-2.5972	0.99993	0.99993	1	22584	0	-2.5972
Pelo	6	0.00038223	0.036575	234	5	-2.9519	0.9932	0.99322	1	22277	0	-2.9519
Naa20	6	0.00038922	0.037087	235	6	-2.2827	0.99964	0.99965	1	22524	0	-2.2827
Cct5	6	0.00039097	0.037098	236	4	-3.0838	0.97635	0.97644	1	21975	0	-3.0838
mmu-mir-466d	3	0.00021589	0.02498	237	3	-4.0534	0.99993	0.99993	1	22583	0	-4.0534
Arcn1	6	0.00039271	0.037108	238	5	-2.205	0.914	0.91768	0.9987	20822	1	-2.205
Parn	6	0.00039446	0.037118	239	5	-2.1431	0.89763	0.90623	0.996842	20588	1	-2.1431
Rpl35	6	0.00040363	0.037824	240	5	-2.9219	0.69523	0.81392	0.97321	18777	1	-2.9219
mmu-mir-5620	4	0.00028837	0.030417	241	2	-3.0816	0.77164	0.78227	0.96857	19456	1	-3.0816
mmu-mir-3470b	4	0.0002923	0.030688	242	3	-5.7054	0.84271	0.84266	0.979324	20018	1	-5.7054
Ube2i	6	0.00041149	0.038402	243	6	-1.9819	0.99992	0.99992	1	22582	0	-1.9819
Brd8	6	0.00041323	0.038407	244	4	-3.3246	0.97685	0.97695	1	21989	0	-3.3246
Aqr	6	0.00041542	0.038452	245	5	-2.696	0.99601	0.99605	1	22357	0	-2.696
Sart3	6	0.00044729	0.041107	246	4	-3.3831	0.48938	0.67363	0.951312	15698	1	-3.3831
Ttk	6	0.00044772	0.041107	247	6	-2.89	0.99899	0.999	1	22483	0	-2.89
Psma7	6	0.00045864	0.041939	248	4	-2.0666	0.25491	0.45966	0.945946	10193	1	-2.0666
Krr1	6	0.00046344	0.042208	249	5	-2.4511	0.99773	0.99776	1	22428	0	-2.4511
Luc7l3	6	0.00047654	0.043228	250	5	-2.165	0.17162	0.36294	0.945946	7568	1	-2.165
Bcas2	6	0.00048352	0.043687	251	5	-2.719	0.44697	0.64756	0.949392	15023	1	-2.719
Thoc2	6	0.00050099	0.045063	252	6	-1.6356	0.99991	0.99991	1	22580	0	-1.6356
Tinf2	6	0.00050273	0.045063	253	5	-2.9585	0.97374	0.97381	1	21922	0	-2.9585
Eif2s1	6	0.00051801	0.046236	254	6	-3.4497	0.99968	0.99969	1	22536	0	-3.4497
Abce1	6	0.00052544	0.046236	255	6	-2.4936	0.99903	0.99904	1	22485	0	-2.4936
Mcm3ap	6	0.00052544	0.046236	256	5	-2.5418	0.97141	0.97145	1	21878	0	-2.5418
Psmc3	6	0.00053242	0.046236	257	5	-2.07	0.99671	0.99676	1	22381	0	-2.07
Ran	6	0.00053373	0.046236	258	5	-2.7778	0.99711	0.99717	1	22396	0	-2.7778
Tardbp	6	0.00053373	0.046236	259	5	-2.686	0.99846	0.99847	1	22460	0	-2.686
Actl6a	6	0.00053417	0.046236	260	6	-2.6861	0.99907	0.99908	1	22488	0	-2.6861
Cops6	6	0.00053417	0.046236	261	5	-2.8099	0.93978	0.94002	1	21274	0	-2.8099
Ptcd1	6	0.00053941	0.046512	262	6	-2.6911	0.9999	0.99991	1	22579	0	-2.6911
Ddx10	6	0.00054246	0.046598	263	5	-2.9221	0.93765	0.93792	1	21232	1	-2.9221
Psma3	6	0.00056036	0.047811	264	3	-1.1945	0.90319	0.90989	0.997886	20658	1	-1.1945
Pfn1	6	0.0005608	0.047811	265	4	-3.1179	0.95187	0.95202	1	21486	0	-3.1179
Utp15	6	0.00058023	0.049282	266	6	-1.323	0.99989	0.9999	1	22578	0	-1.323
Exosc2	6	0.00058372	0.049394	267	4	-3.0444	0.91702	0.92001	0.9989	20871	1	-3.0444
Hdac3	6	0.00058961	0.049523	268	6	-2.5504	0.99989	0.9999	1	22577	0	-2.5504
Prmt5	6	0.00058961	0.049523	269	5	-1.888	0.99651	0.99656	1	22374	0	-1.888
Exosc4	6	0.00059573	0.049849	270	4	-2.5196	0.96822	0.96822	1	21802	0	-2.5196
Rps29	6	0.00059835	0.049849	271	6	-2.5753	0.99984	0.99984	1	22561	0	-2.5753
Nup205	6	0.00060009	0.049849	272	5	-1.3066	0.91234	0.91644	0.998607	20798	1	-1.3066
Uba1	6	0.00060315	0.049921	273	5	-1.862	0.96546	0.96546	1	21754	0	-1.862
Orc3	6	0.00061319	0.050567	274	5	-1.8105	0.92759	0.92867	0.999705	21059	1	-1.8105
Wdr5	6	0.00061668	0.050595	275	5	-2.4629	0.99131	0.99131	1	22238	0	-2.4629
Taf7	6	0.00061799	0.050595	276	4	-2.7793	0.85569	0.88271	0.99212	20123	1	-2.7793
Rbm22	6	0.00062454	0.050796	277	5	-2.855	0.98039	0.98049	1	22055	0	-2.855
Nubp1	6	0.00062629	0.050796	278	5	-1.7431	0.87878	0.89482	0.995529	20350	1	-1.7431
Pmpcb	6	0.00062716	0.050796	279	4	-3.0309	0.94562	0.94574	1	21376	0	-3.0309
Naca	6	0.0006372	0.051425	280	5	-2.745	0.92967	0.93049	1	21094	1	-2.745
Snrpa1	6	0.00064201	0.051629	281	5	-3.1108	0.96942	0.96947	1	21831	0	-3.1108
Gtf2b	6	0.00065729	0.05251	282	5	-2.1757	0.50323	0.68232	0.953477	15918	1	-2.1757
Gtf3c1	6	0.00065903	0.05251	283	6	-1.6387	0.99988	0.99989	1	22575	0	-1.6387
Znhit2	6	0.00065991	0.05251	284	6	-1.8756	0.99988	0.99989	1	22574	0	-1.8756
Dpagt1	6	0.00066602	0.052811	285	6	-2.0497	0.99906	0.99907	1	22486	0	-2.0497
Psmb7	6	0.00066951	0.052903	286	6	-1.9577	0.99988	0.99989	1	22573	0	-1.9577
Sbds	6	0.0006765	0.053269	287	6	-1.4587	0.99988	0.99988	1	22572	0	-1.4587
Nup93	6	0.00068217	0.053401	288	5	-2.5408	0.81495	0.86488	0.986641	19779	1	-2.5408
Snw1	6	0.00068523	0.053401	289	5	-2.2456	0.99745	0.99747	1	22412	0	-2.2456
Exosc3	6	0.00068523	0.053401	290	5	-2.7329	0.95586	0.9559	1	21567	0	-2.7329
Psmd14	6	0.00068785	0.053421	291	6	-1.7276	0.99987	0.99988	1	22571	0	-1.7276
Uba52	6	0.00069876	0.053602	292	6	-1.8694	0.99987	0.99988	1	22570	0	-1.8694
Cct3	6	0.00069876	0.053602	293	5	-2.3163	0.96386	0.96386	1	21727	0	-2.3163
Cops5	6	0.00071011	0.054222	294	5	-3.2809	0.7507	0.84257	0.979324	19336	1	-3.2809
Srp72	6	0.00071361	0.054306	295	3	-2.3018	0.33123	0.54532	0.945946	12451	1	-2.3018
Thoc3	6	0.00072016	0.054621	296	5	-2.8185	0.99459	0.99462	1	22320	0	-2.8185
Pelp1	6	0.00072845	0.055066	297	3	-2.0916	0.96996	0.96998	1	21843	0	-2.0916
Yrdc	6	0.00073456	0.055226	298	6	-1.8682	0.99987	0.99987	1	22569	0	-1.8682
Srsf2	6	0.00073544	0.055226	299	4	-2.6504	0.12353	0.2925	0.945946	5830	2	-2.6504
Heatr3	6	0.00074417	0.055697	300	6	-2.4526	0.99971	0.99972	1	22539	0	-2.4526
Rplp0	6	0.00075203	0.0561	301	6	-3.276	0.99965	0.99966	1	22528	0	-3.276
Ldha	6	0.0007577	0.056338	302	4	-2.7381	0.98897	0.98901	1	22184	0	-2.7381
Rad9a	6	0.00076381	0.056455	303	4	-1.6078	0.97805	0.97813	1	22012	0	-1.6078
Myc	6	0.00076425	0.056455	304	5	-2.6055	0.88107	0.89615	0.995555	20381	1	-2.6055
Fbxo5	6	0.00077648	0.057172	305	5	-2.6033	0.99641	0.99646	1	22369	0	-2.6033
Atp6v1e1	6	0.00078433	0.057474	306	6	-2.2765	0.99986	0.99986	1	22568	0	-2.2765
Dph6	6	0.00078564	0.057474	307	6	-1.6594	0.99986	0.99986	1	22567	0	-1.6594
Esf1	6	0.00079656	0.058026	308	6	-1.657	0.99985	0.99986	1	22565	0	-1.657
Tra2b	6	0.0007983	0.058026	309	5	-2.6324	0.99655	0.99659	1	22377	0	-2.6324
Mga	6	0.00082057	0.059453	310	5	-1.7702	0.9307	0.93135	1	21113	1	-1.7702
Atp2a2	6	0.00082581	0.059642	311	6	-1.4911	0.99985	0.99986	1	22563	0	-1.4911
Tceb3	6	0.00085943	0.061678	312	5	-1.8286	0.80606	0.86142	0.985851	19710	1	-1.8286
Srsf3	6	0.00086554	0.06192	313	5	-1.987	0.98589	0.98597	1	22151	0	-1.987
Ints4	6	0.00087427	0.062175	314	5	-1.71	0.99752	0.99754	1	22416	0	-1.71
Gtf2h2	6	0.00087471	0.062175	315	6	-2.3704	0.99982	0.99982	1	22557	0	-2.3704
Ttc1	6	0.0008865	0.062629	316	4	-3.0273	0.51754	0.69149	0.955523	16137	2	-3.0273
Wdr74	6	0.00088955	0.06265	317	6	-2.4408	0.99984	0.99984	1	22560	0	-2.4408
Ddx47	6	0.00090396	0.063467	318	6	-2.4875	0.99953	0.99955	1	22515	0	-2.4875
Rae1	6	0.00091531	0.064052	319	4	-2.3047	0.87902	0.89494	0.995529	20352	1	-2.3047
Rpl7l1	6	0.00091793	0.064052	320	5	-2.722	0.9958	0.99585	1	22353	0	-2.722
Gins3	6	0.00092404	0.064281	321	5	-2.6068	0.93237	0.9329	1	21147	1	-2.6068
Hist1h4d	6	0.00094587	0.065598	322	3	-1.5102	0.60193	0.74725	0.963896	17386	2	-1.5102
Lonp1	6	0.00095286	0.065881	323	5	-2.461	0.5056	0.68383	0.953844	15956	1	-2.461
Pcf11	6	0.00095635	0.065902	324	3	-0.3638	0.5441	0.70873	0.957312	16547	2	-0.3638
Cnot3	6	0.00095897	0.065902	325	6	-1.6298	0.99982	0.99982	1	22559	0	-1.6298
Vars2	6	0.0009629	0.065972	326	6	-2.051	0.99982	0.99982	1	22558	0	-2.051
Iars	6	0.00097381	0.06612	327	5	-1.8042	0.92396	0.92559	0.99938	21001	1	-1.8042
Noc2l	6	0.00097381	0.06612	328	5	-3.2797	0.99842	0.99843	1	22459	0	-3.2797
Elac2	5	0.00083585	0.060176	329	5	-2.5507	0.99854	0.99856	1	22463	0	-2.5507
A530032D15Rik	4	0.00069964	0.053602	330	4	-2.3045	0.99982	0.99981	1	22556	0	-2.3045
Tln1	6	0.00097905	0.066278	331	5	-1.8042	0.99737	0.99739	1	22407	0	-1.8042
Hist1h2ap	3	0.00052675	0.046236	332	2	-0.95272	0.59055	0.61732	0.945994	17208	1	-0.95272
Spata5l1	6	0.001009	0.068099	333	5	-2.7938	0.53843	0.70498	0.956897	16459	1	-2.7938
Mrpl47	6	0.0010225	0.068807	334	6	-1.4874	0.99981	0.99981	1	22555	0	-1.4874
Gtf2e2	6	0.0010271	0.068911	335	5	-2.759	0.96452	0.96453	1	21737	0	-2.759
Rpl39	5	0.00087733	0.062175	336	5	-3.5167	0.99691	0.99691	1	22386	0	-3.5167
Eif4a1	6	0.0010428	0.069554	337	5	-2.677	0.99117	0.99117	1	22233	0	-2.677
Narfl	6	0.0010533	0.069839	338	6	-1.0301	0.99981	0.99981	1	22554	0	-1.0301
Rpl35a	6	0.0010568	0.069839	339	6	-2.1928	0.99981	0.99981	1	22553	0	-2.1928
Dynlrb1	6	0.0010594	0.069839	340	5	-2.5483	0.90061	0.90819	0.99743	20626	1	-2.5483
Rpl5	6	0.0010725	0.070478	341	5	-3.0365	0.99344	0.99345	1	22286	0	-3.0365
Erh	6	0.0010768	0.070478	342	5	-2.7823	0.99709	0.99714	1	22392	0	-2.7823
Tti2	6	0.0010812	0.070478	343	6	-1.8819	0.9998	0.9998	1	22552	0	-1.8819
Gtf3c3	6	0.0010843	0.070478	344	5	-2.9255	0.00079529	0.00414	0.945946	77	1	-2.9255
Gemin6	6	0.0010886	0.070478	345	4	-2.4652	0.99651	0.99655	1	22373	0	-2.4652
Ddost	6	0.0010895	0.070478	346	5	-1.7504	0.93073	0.93139	1	21114	1	-1.7504
Hspa5	6	0.00111	0.071515	347	5	-2.5001	0.9897	0.98974	1	22204	0	-2.5001
Rps2	6	0.0011175	0.071754	348	5	-1.8942	0.89337	0.90353	0.996666	20529	1	-1.8942
Hus1	6	0.0011201	0.071754	349	5	-1.9006	0.86114	0.88542	0.992807	20175	1	-1.9006
Rpn1	6	0.0011301	0.072194	350	5	-2.4649	0.96482	0.96483	1	21742	0	-2.4649
Glrx	6	0.0011576	0.073743	351	5	-2.2485	0.30381	0.51478	0.945946	11644	1	-2.2485
Zfp259	6	0.0011773	0.074603	352	6	-1.3083	0.99978	0.99978	1	22551	0	-1.3083
Rpl15	6	0.0011777	0.074603	353	5	-2.583	0.99559	0.99563	1	22345	0	-2.583
Exosc6	6	0.0011943	0.075443	354	5	-2.7442	0.28521	0.4939	0.945946	11103	1	-2.7442
Znhit6	6	0.0012065	0.076004	355	6	-2.5306	0.99974	0.99975	1	22543	0	-2.5306
Kpnb1	5	0.0010485	0.069728	356	4	-2.7127	0.21656	0.39952	0.945946	9010	1	-2.7127
Aasdhppt	6	0.0012144	0.076287	357	4	-2.5058	0.9949	0.99494	1	22331	0	-2.5058
Nup62	6	0.0012262	0.076672	358	6	-1.5659	0.99977	0.99978	1	22550	0	-1.5659
Fam50a	6	0.0012279	0.076672	359	5	-1.9884	0.9737	0.97378	1	21920	0	-1.9884
Nedd8	6	0.0012323	0.076672	360	6	-1.8919	0.99967	0.99968	1	22533	0	-1.8919
Rfc5	6	0.001234	0.076672	361	6	-1.829	0.99971	0.99972	1	22538	0	-1.829
Snrpf	6	0.0012384	0.076733	362	5	-2.4907	0.99564	0.99568	1	22348	0	-2.4907
Prpf38a	6	0.0012441	0.076874	363	6	-1.6786	0.99977	0.99977	1	22549	0	-1.6786
Hsd17b10	6	0.0012497	0.077015	364	6	-1.2191	0.99977	0.99977	1	22548	0	-1.2191
Taf10	5	0.0010908	0.070478	365	2	-0.56623	0.77671	0.81505	0.973261	19486	1	-0.56623
Dut	6	0.0012598	0.077424	366	4	-2.385	0.97908	0.97917	1	22033	0	-2.385
Tubb5	6	0.0012659	0.077589	367	5	-2.3615	0.8175	0.8659	0.98678	19798	1	-2.3615
Ranbp1	6	0.0012777	0.0781	368	6	-1.3115	0.99976	0.99977	1	22547	0	-1.3115
Thoc7	6	0.0012847	0.078316	369	5	-2.3456	0.96298	0.96299	1	21700	0	-2.3456
Nol11	6	0.0012951	0.078586	370	6	-2.0624	0.99976	0.99977	1	22546	0	-2.0624
Mcm6	6	0.001296	0.078586	371	6	-2.1037	0.99976	0.99977	1	22545	0	-2.1037
Strip1	6	0.0012995	0.078587	372	6	-2.2253	0.99936	0.99938	1	22502	0	-2.2253
Sfi1	6	0.0013497	0.081191	373	5	-2.5994	0.98082	0.98093	1	22063	0	-2.5994
Mtbp	6	0.0013729	0.082364	374	6	-1.5667	0.99975	0.99976	1	22544	0	-1.5667
Prpf19	6	0.0014008	0.083405	375	4	-3.0091	0.72284	0.83438	0.976881	19184	1	-3.0091
Rps3a1	6	0.0014012	0.083405	376	4	-2.2825	0.97753	0.97761	1	22000	0	-2.2825
Zfp768	6	0.00141	0.08359	377	6	-1.9751	0.99974	0.99975	1	22542	0	-1.9751
Copb2	6	0.0014117	0.08359	378	5	-2.3501	0.94924	0.94937	1	21442	0	-2.3501
Sf3a3	6	0.0014397	0.084853	379	5	-2.2663	0.99712	0.99717	1	22397	0	-2.2663
Sdad1	6	0.0014405	0.084853	380	4	-2.8109	0.90878	0.91383	0.998254	20745	1	-2.8109
Psmd12	6	0.0014449	0.084889	381	6	-3.5779	0.99952	0.99954	1	22513	0	-3.5779
Psmd6	6	0.0014549	0.085259	382	5	-2.9777	0.99048	0.99049	1	22223	0	-2.9777
Triap1	6	0.0014916	0.087182	383	6	-1.7642	0.99929	0.99931	1	22494	0	-1.7642
Pmf1	6	0.0014964	0.087238	384	5	-1.6593	0.97541	0.9755	1	21952	0	-1.6593
Chordc1	6	0.0015051	0.087522	385	4	-2.4984	0.65673	0.78563	0.969131	18214	1	-2.4984
Mybbp1a	6	0.0015165	0.087739	386	4	-2.0746	0.98953	0.98957	1	22199	0	-2.0746
Rbm8a	6	0.00152	0.087739	387	5	-2.5491	0.76131	0.84591	0.980665	19391	1	-2.5491
Gins2	6	0.0015235	0.087739	388	5	-2.1644	0.87767	0.89419	0.995503	20338	1	-2.1644
Rpl36a	6	0.0015357	0.087739	389	5	-1.7952	0.99577	0.99582	1	22352	0	-1.7952
Usp39	6	0.0015383	0.087739	390	5	-2.1183	0.99335	0.99337	1	22281	0	-2.1183
Mrps21	6	0.0015479	0.087739	391	3	-0.66398	0.46595	0.65913	0.950195	15326	1	-0.66398
Adar	6	0.0015488	0.087739	392	6	-2.0175	0.99971	0.99972	1	22541	0	-2.0175
Slc39a7	6	0.001551	0.087739	393	6	-1.4573	0.99971	0.99972	1	22540	0	-1.4573
Ncaph2	6	0.0015514	0.087739	394	4	-2.3171	0.12339	0.29224	0.945946	5825	1	-2.3171
Rpl4	6	0.0015951	0.08961	395	5	-2.2798	0.98932	0.98935	1	22194	0	-2.2798
Ptma	5	0.0013803	0.082591	396	3	-1.236	0.15569	0.31446	0.945946	7030	1	-1.236
Nuf2	6	0.0015964	0.08961	397	4	-3.2721	0.50937	0.68622	0.954444	16019	1	-3.2721
Imp3	6	0.0015986	0.08961	398	5	-2.0261	0.97911	0.9792	1	22034	0	-2.0261
Dhps	6	0.0016003	0.08961	399	5	-1.9268	0.98878	0.98882	1	22180	0	-1.9268
Rps11	6	0.0016309	0.090542	400	3	-0.85885	0.97656	0.97663	1	21981	0	-0.85885
Tceb2	6	0.0016363	0.090542	401	5	-2.0357	0.99739	0.99742	1	22408	0	-2.0357
Eif3b	6	0.001637	0.090542	402	5	-2.5468	0.14937	0.33618	0.945946	6843	1	-2.5468
Mtor	6	0.0016409	0.090542	403	5	-2.7478	0.02441	0.086197	0.945946	1526	1	-2.7478
Snrpa	6	0.0016409	0.090542	404	4	-2.8487	0.96799	0.96799	1	21794	0	-2.8487
Prc1	6	0.0016409	0.090542	405	4	-3.1059	0.99749	0.99751	1	22414	0	-3.1059
Pop1	6	0.0016632	0.091548	406	5	-1.9868	0.99472	0.99475	1	22324	0	-1.9868
Srrm1	6	0.0016689	0.091602	407	5	-1.7703	0.99002	0.99004	1	22216	0	-1.7703
N6amt1	6	0.0016754	0.091602	408	4	-2.6103	0.93884	0.93909	1	21258	1	-2.6103
Cltc	6	0.0016763	0.091602	409	5	-1.5262	0.99392	0.99393	1	22306	0	-1.5262
Med8	6	0.0016968	0.092397	410	5	-2.3158	0.99832	0.99833	1	22457	0	-2.3158
Snupn	6	0.001699	0.092397	411	4	-1.5249	0.59803	0.74461	0.963896	17315	2	-1.5249
Cirh1a	6	0.0017077	0.09265	412	4	-2.3422	0.96763	0.96767	1	21790	0	-2.3422
Rplp1	6	0.001723	0.093256	413	5	-2.1172	0.9969	0.99695	1	22385	0	-2.1172
Psmg2	6	0.0017361	0.093589	414	5	-1.8364	0.49303	0.67588	0.951818	15761	1	-1.8364
Ppih	6	0.0017374	0.093589	415	4	-2.3406	0.99469	0.99473	1	22323	0	-2.3406
Mipep	6	0.0017466	0.093661	416	4	-3.0236	0.96568	0.96569	1	21756	0	-3.0236
Hspe1	5	0.0015278	0.087739	417	4	-1.9974	0.9839	0.98399	1	22112	0	-1.9974
Yars2	6	0.0017798	0.094968	418	4	-2.5334	0.95228	0.95241	1	21500	0	-2.5334
Cul2	6	0.0017798	0.094968	419	6	-1.0327	0.99967	0.99968	1	22535	0	-1.0327
Ppp1r12a	5	0.001544	0.087739	420	5	-3.3534	0.99967	0.99967	1	22534	0	-3.3534
Rps28	6	0.0017841	0.094977	421	4	-2.355	0.98168	0.9818	1	22076	0	-2.355
Kdsr	6	0.0017933	0.095001	422	5	-2.0557	0.96349	0.9635	1	21719	0	-2.0557
1110037F02Rik	6	0.0017963	0.095001	423	5	-2.2686	0.79362	0.85685	0.984547	19607	1	-2.2686
Rft1	6	0.0017998	0.095001	424	5	-1.585	0.99799	0.99799	1	22439	0	-1.585
Zfp830	6	0.0018016	0.095001	425	5	-2.2765	0.98582	0.9859	1	22148	0	-2.2765
Dctn5	6	0.0018055	0.095001	426	4	-2.6697	0.89776	0.90632	0.996842	20591	1	-2.6697
Grwd1	6	0.0018173	0.0954	427	4	-2.4348	0.99278	0.99278	1	22266	0	-2.4348
Trappc1	6	0.0018269	0.095683	428	5	-1.4824	0.99642	0.99646	1	22370	0	-1.4824
Eif3a	6	0.0018636	0.097291	429	5	-2.4804	0.99799	0.99799	1	22440	0	-2.4804
Mcm7	6	0.0018662	0.097291	430	5	-1.9857	0.60557	0.74974	0.964039	17451	1	-1.9857
Gm2012	2	0.00069658	0.053602	431	2	-5.1098	0.99965	0.99966	1	22530	0	-5.1098
Ptpn11	6	0.0018732	0.097432	432	6	-1.4122	0.99965	0.99966	1	22529	0	-1.4122
Lsm3	6	0.0018876	0.097956	433	5	-1.8861	0.99561	0.99565	1	22346	0	-1.8861
mmu-mir-680-2	3	0.0010323	0.069059	434	2	-5.9729	0.85055	0.85055	0.982602	20081	0	-5.9729
Wdr92	6	0.0018924	0.097981	435	5	-2.9939	0.51864	0.6922	0.955523	16162	1	-2.9939
Crnkl1	6	0.0019046	0.098064	436	5	-1.9777	0.9953	0.99535	1	22337	0	-1.9777
Rad51	6	0.0019064	0.098064	437	6	-1.2962	0.99964	0.99966	1	22527	0	-1.2962
Strap	6	0.0019129	0.098064	438	6	-1.4864	0.99964	0.99965	1	22526	0	-1.4864
Anapc10	6	0.0019138	0.098064	439	5	-1.4733	0.97791	0.97799	1	22010	0	-1.4733
Fdxr	6	0.0019173	0.098064	440	4	-2.1766	0.88807	0.90023	0.9962	20457	1	-2.1766
Snap23	6	0.0019208	0.098064	441	6	-1.0249	0.99964	0.99965	1	22525	0	-1.0249
Pno1	6	0.0019243	0.098064	442	6	-2.0208	0.99958	0.9996	1	22523	0	-2.0208
Cpsf3l	6	0.0019391	0.098599	443	4	-2.117	0.9946	0.99463	1	22321	0	-2.117
Tnpo3	6	0.0019998	0.101457	444	5	-2.3824	0.99329	0.9933	1	22279	0	-2.3824
Gapdh	6	0.0020107	0.101557	445	4	-2.8549	0.96455	0.96456	1	21738	0	-2.8549
Ppwd1	6	0.00205	0.103082	446	4	-2.682	0.56881	0.72492	0.960123	16907	2	-2.682
Utp23	6	0.0020552	0.103117	447	5	-2.1814	0.89152	0.90233	0.996666	20499	1	-2.1814
Snrpd1	6	0.0020631	0.103283	448	5	-1.6822	0.99887	0.99887	1	22478	0	-1.6822
Nop2	6	0.0020812	0.10396	449	5	-1.6607	0.93383	0.93423	1	21170	1	-1.6607
Tbcd	6	0.0020876	0.104047	450	5	-2.2482	0.97576	0.97585	1	21960	0	-2.2482
Psma2	6	0.0020959	0.104232	451	4	-2.8513	0.4779	0.66654	0.950673	15518	2	-2.8513
Terf2	6	0.0021212	0.10526	452	4	-2.1704	0.92039	0.92266	0.998913	20938	1	-2.1704
Sf1	6	0.0021522	0.106565	453	4	-2.3328	0.91474	0.91823	0.9987	20834	1	-2.3328
Deb1	6	0.0021945	0.108319	454	5	-2.5232	0.99656	0.9966	1	22378	0	-2.5232
Malsu1	6	0.0021971	0.108319	455	4	-2.0536	0.56264	0.72076	0.959048	16816	1	-2.0536
Mcmbp	6	0.0022473	0.110554	456	4	-2.3612	0.12753	0.29987	0.945946	5995	1	-2.3612
Sys1	6	0.002274	0.111247	457	5	-2.2512	0.99823	0.99823	1	22453	0	-2.2512
Ddx39b	6	0.0022744	0.111247	458	6	-1.7078	0.99957	0.99958	1	22521	0	-1.7078
Atp5k	6	0.0022762	0.111247	459	3	-1.675	0.65363	0.78345	0.968901	18168	1	-1.675
Rpl3	6	0.0022989	0.111926	460	4	-2.7892	0.9598	0.9598	1	21637	0	-2.7892
Slc7a6os	6	0.0023041	0.111926	461	6	-1.0786	0.99956	0.99958	1	22520	0	-1.0786
Imp4	5	0.0020081	0.101557	462	5	-1.9702	0.99956	0.99957	1	22519	0	-1.9702
Cct6a	6	0.0023294	0.112637	463	4	-2.4704	0.32902	0.54289	0.945946	12376	2	-2.4704
Ei24	6	0.0023521	0.113048	464	4	-2.2302	0.70795	0.82353	0.975619	18950	1	-2.2302
Ecd	6	0.0023604	0.113048	465	6	-1.8961	0.9993	0.99932	1	22495	0	-1.8961
Arfrp1	6	0.002363	0.113048	466	5	-2.5472	0.98587	0.98595	1	22150	0	-2.5472
Cenpe	6	0.002367	0.113048	467	5	-2.7559	0.98753	0.98755	1	22173	0	-2.7559
Mdm2	6	0.0023674	0.113048	468	5	-2.5841	0.99754	0.99757	1	22418	0	-2.5841
Ccnt1	6	0.002398	0.114246	469	4	-1.9964	0.958	0.95804	1	21606	0	-1.9964
Nup98	6	0.0024202	0.114845	470	4	-2.8228	0.84659	0.87835	0.990419	20048	1	-2.8228
Polr2i	6	0.0024207	0.114845	471	5	-2.8322	0.99511	0.99515	1	22334	0	-2.8322
mmu-mir-3472	4	0.001747	0.093661	472	4	-3.0574	0.99954	0.99952	1	22517	0	-3.0574
Pex7	6	0.0024294	0.114862	473	5	-1.6774	0.83286	0.87223	0.988296	19924	1	-1.6774
Tm2d1	6	0.0024312	0.114862	474	4	-2.2177	0.94805	0.94819	1	21418	0	-2.2177
Aar2	6	0.0024364	0.11487	475	5	-1.4093	0.82845	0.87038	0.98787	19890	1	-1.4093
D8Ertd738e	6	0.0024646	0.115957	476	5	-1.4941	0.61037	0.75301	0.965045	17513	1	-1.4941
Hspa14	6	0.0024783	0.116362	477	5	-1.5878	0.99819	0.9982	1	22448	0	-1.5878
Mrps14	6	0.0025198	0.118065	478	6	-1.3602	0.99952	0.99954	1	22514	0	-1.3602
Pi4ka	6	0.0025381	0.118314	479	5	-1.4732	0.99618	0.99622	1	22362	0	-1.4732
Taf11	6	0.0025394	0.118314	480	6	-1.1656	0.99952	0.99954	1	22512	0	-1.1656
Rtf1	6	0.0025407	0.118314	481	3	-2.0588	0.95587	0.95591	1	21568	0	-2.0588
Sfpq	6	0.0025674	0.119309	482	6	-1.8026	0.99951	0.99953	1	22511	0	-1.8026
Psmc6	6	0.0025728	0.119318	483	4	-2.307	0.72877	0.83604	0.97735	19219	1	-2.307
Gm8693	2	0.00097338	0.06612	484	2	-4.0877	0.99951	0.99951	1	22510	0	-4.0877
Rrp15	6	0.0026032	0.120479	485	5	-1.7405	0.99879	0.99879	1	22475	0	-1.7405
Gtf2a2	6	0.0026403	0.121948	486	5	-2.2569	0.99042	0.99044	1	22221	0	-2.2569
Ddx19a	6	0.0026687	0.123008	487	4	-2.555	0.98346	0.98356	1	22105	0	-2.555
Ect2	6	0.0027411	0.125863	488	5	-2.128	0.9814	0.98152	1	22070	0	-2.128
Rsrc2	6	0.0027433	0.125863	489	4	-2.6208	0.92252	0.92439	0.99938	20970	1	-2.6208
Rrs1	6	0.0027472	0.125863	490	3	-1.1521	0.9723	0.97234	1	21895	0	-1.1521
Brf1	6	0.0027787	0.126755	491	5	-1.3694	0.32215	0.53528	0.945946	12174	1	-1.3694
Urb1	6	0.0027791	0.126755	492	5	-1.5306	0.99713	0.99718	1	22398	0	-1.5306
Gid4	6	0.0027835	0.126755	493	6	-1.442	0.99947	0.99949	1	22508	0	-1.442
Dnajc9	6	0.0028079	0.127612	494	5	-1.7696	0.87376	0.89205	0.995144	20290	1	-1.7696
Ruvbl1	6	0.0028232	0.127794	495	5	-1.7191	0.99736	0.99739	1	22406	0	-1.7191
mmu-mir-3473f	4	0.0020483	0.103082	496	2	-2.8074	0.38758	0.53595	0.945946	13949	1	-2.8074
Eif3f	6	0.0029179	0.131335	497	4	-2.2022	0.92916	0.93003	1	21085	1	-2.2022
Ttc4	6	0.0029188	0.131335	498	5	-2.0245	0.82856	0.87042	0.98787	19891	1	-2.0245
Casp8	6	0.002966	0.133193	499	6	-1.1168	0.99943	0.99945	1	22507	0	-1.1168
Cept1	6	0.0030005	0.133683	500	4	-2.4044	0.84838	0.8792	0.990829	20064	1	-2.4044
Clec16a	6	0.0030005	0.133683	501	5	-2.3598	0.94467	0.94481	1	21357	0	-2.3598
Rnf20	6	0.0030005	0.133683	502	5	-2.444	0.97552	0.97561	1	21955	0	-2.444
Ddx24	6	0.0030467	0.135479	503	4	-1.6786	0.96664	0.96666	1	21771	0	-1.6786
Alyref	6	0.0030987	0.137111	504	6	-1.7599	0.99941	0.99943	1	22505	0	-1.7599
Nars2	6	0.0031022	0.137111	505	5	-2.1051	0.84608	0.87812	0.990249	20045	1	-2.1051
Wdr83	6	0.0031057	0.137111	506	5	-1.9077	0.92875	0.92966	1	21079	1	-1.9077
Huwe1	6	0.0031166	0.137111	507	5	-1.6433	0.9563	0.95634	1	21574	0	-1.6433
Seh1l	6	0.003117	0.137111	508	5	-1.4755	0.99431	0.99433	1	22312	0	-1.4755
Dmap1	6	0.0031245	0.137111	509	4	-2.1823	0.98049	0.9806	1	22060	0	-2.1823
Mcat	6	0.0031258	0.137111	510	6	-1.0095	0.9994	0.99943	1	22504	0	-1.0095
Spty2d1	6	0.0031502	0.137843	511	3	-0.15193	0.39812	0.61751	0.945994	14238	3	-0.15193
Nop56	6	0.0031576	0.137843	512	5	-1.4451	0.97649	0.97657	1	21979	0	-1.4451
Slu7	6	0.003172	0.138072	513	4	-2.1084	0.98498	0.98509	1	22129	0	-2.1084
mmu-mir-3473d	4	0.0023098	0.111926	514	3	-3.3739	0.76902	0.78034	0.96853	19437	1	-3.3739
Rpl41	4	0.0023098	0.111926	515	2	-2.277	0.17982	0.33054	0.945946	7838	2	-2.277
5730507C01Rik	5	0.0028202	0.127794	516	2	0.26897	0.28651	0.48435	0.945946	11152	2	0.26897
Haus5	6	0.0032445	0.140687	517	4	-2.1403	0.25848	0.46375	0.945946	10298	1	-2.1403
Pclo	6	0.0032642	0.141269	518	5	-1.9639	0.76104	0.84582	0.980665	19389	1	-1.9639
Rrp12	6	0.0032825	0.141792	519	6	-0.97888	0.99937	0.99939	1	22503	0	-0.97888
Tmx2	6	0.0032969	0.142143	520	5	-1.9184	0.9823	0.98243	1	22085	0	-1.9184
Emg1	5	0.00288	0.130103	521	4	-2.9244	0.99529	0.99531	1	22336	0	-2.9244
Pold2	6	0.0033218	0.142944	522	5	-1.2798	0.97562	0.9757	1	21957	0	-1.2798
Lyar	6	0.0033406	0.143452	523	4	-2.0447	0.62854	0.76565	0.966535	17786	2	-2.0447
Napa	6	0.0033519	0.143452	524	5	-2.5687	0.99872	0.99872	1	22471	0	-2.5687
Wdr36	6	0.0033572	0.143452	525	5	-2.0156	0.95025	0.95037	1	21460	0	-2.0156
Cct2	6	0.0033755	0.14389	526	4	-2.0059	0.66957	0.79509	0.970484	18402	1	-2.0059
Mis18a	6	0.0033982	0.144586	527	6	-1.4616	0.99935	0.99937	1	22501	0	-1.4616
Prpf31	5	0.0029843	0.133683	528	4	-2.9374	0.99279	0.99279	1	22267	0	-2.9374
Mrp63	6	0.0034248	0.145446	529	6	-1.9982	0.99934	0.99937	1	22500	0	-1.9982
Alg2	6	0.0034672	0.14697	530	5	-2.0558	0.96522	0.96522	1	21746	0	-2.0558
Mrpl52	6	0.0035078	0.148174	531	5	-2.179	0.98699	0.98701	1	22168	0	-2.179
Mre11a	6	0.0035152	0.148174	532	5	-1.8511	0.94316	0.94332	1	21336	0	-1.8511
Smc2	6	0.0035658	0.15003	533	6	-1.9715	0.99932	0.99934	1	22497	0	-1.9715
LOC100861615	2	0.001334	0.080459	534	2	-4.1378	0.99931	0.99933	1	22496	0	-4.1378
Vps25	6	0.0035785	0.150284	535	4	-2.1415	0.96369	0.9637	1	21721	0	-2.1415
BC052040	6	0.0036025	0.151013	536	5	-1.9732	0.91789	0.92068	0.9989	20887	1	-1.9732
Hmgb1	6	0.0036152	0.151264	537	4	-2.2251	0.88011	0.89559	0.995529	20368	1	-2.2251
Rrm1	5	0.0031607	0.137843	538	5	-2.0768	0.9989	0.99891	1	22480	0	-2.0768
Utp6	6	0.0036868	0.153976	539	5	-2.1304	0.0072345	0.029838	0.945946	531	1	-2.1304
Fam96b	6	0.0037366	0.155482	540	5	-1.8357	0.99563	0.99567	1	22347	0	-1.8357
Nrf1	6	0.0037911	0.157	541	4	-2.3646	0.99397	0.994	1	22309	0	-2.3646
Med20	6	0.0038007	0.157	542	4	-2.2165	0.98663	0.98666	1	22163	0	-2.2165
Cenpl	6	0.0038156	0.157327	543	4	-1.9717	0.99001	0.99004	1	22215	0	-1.9717
Arl2	6	0.0038407	0.158074	544	5	-1.4623	0.55792	0.7177	0.958582	16745	1	-1.4623
Ndc80	6	0.0038688	0.158945	545	4	-1.9543	0.22112	0.42087	0.945946	9158	1	-1.9543
Hist1h4b	5	0.0033589	0.143452	546	3	-2.0905	0.043908	0.12579	0.945946	2436	2	-2.0905
Pgam1	6	0.003902	0.160018	547	5	-1.8586	0.78387	0.85344	0.98321	19534	1	-1.8586
Polr3d	6	0.0039182	0.160391	548	6	-1.3302	0.99925	0.99927	1	22492	0	-1.3302
Ppp2r1a	6	0.0039509	0.16144	549	5	-2.0922	0.99795	0.99796	1	22436	0	-2.0922
Pop5	6	0.0039614	0.161518	550	5	-2.4694	0.99755	0.99758	1	22422	0	-2.4694
Ptcd3	6	0.0039671	0.161518	551	4	-2.053	0.71057	0.82548	0.975619	18998	2	-2.053
Nat10	6	0.0040513	0.164653	552	6	-1.5452	0.99922	0.99924	1	22491	0	-1.5452
Cct7	6	0.0040762	0.16482	553	5	-1.7891	0.99027	0.99028	1	22219	0	-1.7891
Timm22	6	0.0040802	0.16482	554	4	-1.9411	0.96539	0.96539	1	21751	0	-1.9411
Brca1	6	0.0040836	0.16482	555	4	-2.0371	0.99082	0.99082	1	22228	0	-2.0371
Ckap5	6	0.0040845	0.16482	556	4	-1.3116	0.99382	0.99383	1	22302	0	-1.3116
Atp5a1	5	0.0035126	0.148174	557	3	-1.776	0.95975	0.95984	1	21635	0	-1.776
Nup153	6	0.0041814	0.167835	558	4	-1.9494	0.25324	0.45771	0.945946	10147	2	-1.9494
Ppil4	6	0.0042312	0.169533	559	5	-2.0423	0.85153	0.88069	0.991339	20089	1	-2.0423
Pomp	6	0.0042762	0.171032	560	5	-1.7936	0.99802	0.99803	1	22441	0	-1.7936
Rrp1	6	0.0043814	0.174625	561	4	-2.0632	0.98921	0.98924	1	22192	0	-2.0632
Cenpc1	6	0.0044054	0.175274	562	6	-2.1101	0.99915	0.99918	1	22490	0	-2.1101
Wdr55	5	0.003799	0.157	563	4	-2.8139	0.85455	0.86192	0.985942	20111	1	-2.8139
Chaf1b	6	0.0044713	0.176965	564	6	-1.5309	0.99914	0.99917	1	22489	0	-1.5309
mmu-mir-5118	4	0.0031782	0.138073	565	3	-4.0388	0.50699	0.63742	0.949101	15980	1	-4.0388
Tma16	6	0.0044923	0.177485	566	5	-2.1519	0.98738	0.98741	1	22172	0	-2.1519
Chek1	6	0.0045281	0.17857	567	5	-1.5655	0.95724	0.95727	1	21592	0	-1.5655
Npm1	6	0.0045355	0.17857	568	5	-1.8819	0.91159	0.91585	0.998607	20779	1	-1.8819
Nfyb	6	0.00457	0.179616	569	4	-2.5197	0.86303	0.88639	0.993211	20191	1	-2.5197
Fam32a	6	0.004608	0.180484	570	5	-1.2136	0.98244	0.98257	1	22089	0	-1.2136
Trappc8	6	0.0046255	0.180855	571	5	-2.6085	0.91794	0.92071	0.9989	20888	1	-2.6085
Xab2	6	0.0046516	0.181481	572	4	-1.0824	0.96984	0.96986	1	21838	0	-1.0824
Zzz3	6	0.0046591	0.181481	573	5	-2.0389	0.99889	0.99889	1	22479	0	-2.0389
Atp6v0c	6	0.0046722	0.181481	574	4	-2.2822	0.47703	0.666	0.950564	15500	1	-2.2822
Eif6	6	0.0046735	0.181481	575	5	-2.4096	0.97094	0.97098	1	21867	0	-2.4096
Ddx54	6	0.0047167	0.182409	576	5	-2.2197	0.96725	0.96727	1	21783	0	-2.2197
Alg11	6	0.0047215	0.182409	577	5	-2.0966	0.94269	0.94289	1	21325	0	-2.0966
Bud13	6	0.0047643	0.183361	578	3	-1.7741	0.71286	0.8272	0.975619	19044	2	-1.7741
Utp18	6	0.0047704	0.183361	579	5	-2.0169	0.94653	0.94667	1	21389	0	-2.0169
Slc35b1	6	0.0048145	0.184743	580	5	-1.8498	0.99717	0.99721	1	22399	0	-1.8498
Gm13271	6	0.0048468	0.185669	581	4	-1.857	0.31813	0.53075	0.945946	12073	1	-1.857
Pabpc1	6	0.0048551	0.185673	582	5	-1.8559	0.97923	0.97932	1	22039	0	-1.8559
Naip6	5	0.0041675	0.167571	583	5	-0.97171	0.99906	0.99908	1	22487	0	-0.97171
Bard1	6	0.0049861	0.190361	584	5	-1.7443	0.93888	0.93913	1	21260	1	-1.7443
Rps10	6	0.0050153	0.191156	585	3	-0.40431	0.7109	0.82571	0.975619	19006	2	-0.40431
Actr10	5	0.0043273	0.172771	586	4	-1.7228	0.49387	0.64718	0.949392	15771	1	-1.7228
Ap2m1	6	0.0051092	0.194081	587	4	-1.9294	0.97845	0.97855	1	22022	0	-1.9294
Fam69a	6	0.0051529	0.195412	588	4	-2.1287	0.76512	0.84712	0.981362	19416	1	-2.1287
Las1l	6	0.0051742	0.195896	589	6	-1.566	0.999	0.99901	1	22484	0	-1.566
Utp11l	6	0.0052066	0.196614	590	5	-2.5248	0.84531	0.87776	0.9902	20037	1	-2.5248
Rptor	6	0.0052149	0.196614	591	5	-2.0781	0.98412	0.98423	1	22117	0	-2.0781
Akirin2	5	0.0044587	0.176772	592	4	-2.8754	0.84686	0.85649	0.98426	20051	1	-2.8754
Dsg1a	4	0.0037304	0.155482	593	4	-1.3166	0.99899	0.99899	1	22482	0	-1.3166
Hspa8	6	0.0052943	0.199102	594	4	-2.2896	0.36362	0.58046	0.945946	13319	1	-2.2896
Rsl24d1	6	0.0053028	0.199102	595	4	-1.3098	0.33765	0.55229	0.945946	12626	2	-1.3098
Sae1	5	0.0045857	0.179922	596	3	-2.7204	0.34417	0.52876	0.945946	12780	2	-2.7204
Wdr33	6	0.005357	0.200802	597	4	-2.0524	0.52818	0.69834	0.955657	16309	1	-2.0524
Nup155	6	0.0053939	0.201851	598	5	-1.5265	0.96836	0.96836	1	21804	0	-1.5265
Kif18a	6	0.0054148	0.202302	599	4	-2.1033	0.83681	0.87394	0.989132	19955	1	-2.1033
Hspd1	5	0.0046966	0.182068	600	4	-1.8369	0.95353	0.95362	1	21523	0	-1.8369
Cdt1	6	0.0054772	0.204297	601	4	-1.716	0.94537	0.94549	1	21372	0	-1.716
Hnrnpf	6	0.0054886	0.204321	602	3	-1.6194	0.96136	0.96143	1	21673	0	-1.6194
0610009D07Rik	6	0.0055082	0.204321	603	4	-2.0075	0.98565	0.98574	1	22146	0	-2.0075
Tmed2	6	0.0055139	0.204321	604	3	-1.4044	0.90648	0.9122	0.99819	20707	1	-1.4044
Smc5	6	0.005658	0.208637	605	4	-2.2392	0.78665	0.85438	0.983681	19558	1	-2.2392
Ppp1r11	6	0.0056846	0.208858	606	4	-2.0423	0.82528	0.86905	0.987702	19862	1	-2.0423
Ino80	6	0.0056912	0.208858	607	4	-1.9235	0.27119	0.47818	0.945946	10715	2	-1.9235
Uba5	6	0.0056916	0.208858	608	5	-2.0402	0.96497	0.96497	1	21744	0	-2.0402
Rpa2	6	0.0057776	0.211672	609	5	-1.4778	0.99742	0.99744	1	22410	0	-1.4778
2700029M09Rik	6	0.0057981	0.212081	610	5	-2.7137	0.92457	0.92609	0.99938	21009	1	-2.7137
Mrpl14	6	0.0058872	0.214646	611	4	-2.3729	0.49116	0.67471	0.951484	15738	1	-2.3729
Psmd8	6	0.0059431	0.216336	612	5	-1.9842	0.96654	0.96656	1	21767	0	-1.9842
Actr2	6	0.0059645	0.216767	613	5	-1.8512	0.993	0.99303	1	22271	0	-1.8512
Mms19	6	0.0059859	0.217196	614	4	-1.8893	0.93641	0.93669	1	21214	1	-1.8893
Ccnk	6	0.0060418	0.218588	615	4	-2.2206	0.91023	0.91483	0.998542	20762	1	-2.2206
1810022K09Rik	6	0.0060435	0.218588	616	5	-1.2399	0.62965	0.76643	0.966535	17806	1	-1.2399
Ccdc84	6	0.0060623	0.218918	617	5	-1.6213	0.74189	0.83992	0.97864	19288	1	-1.6213
Srp54a	2	0.0023678	0.113048	618	2	-2.9528	0.99878	0.99877	1	22474	0	-2.9528
Ogt	6	0.0061068	0.220175	619	3	-0.97541	0.62007	0.75985	0.966145	17655	1	-0.97541
Pak1ip1	6	0.0061483	0.221093	620	4	-1.8083	0.8519	0.88089	0.991339	20094	1	-1.8083
Pex11a	6	0.0061518	0.221093	621	3	-0.53646	0.3138	0.5259	0.945946	11937	3	-0.53646
Sf3b1	5	0.0055026	0.204321	622	5	-1.7928	0.99876	0.99876	1	22472	0	-1.7928
Wbp11	6	0.0062107	0.222358	623	4	-1.8572	0.74991	0.84233	0.979324	19331	1	-1.8572
Uri1	6	0.0062164	0.222358	624	5	-2.3101	0.55336	0.71472	0.957878	16684	1	-2.3101
Cnot1	6	0.0062299	0.222492	625	4	-2.3808	0.96241	0.96243	1	21694	0	-2.3808
Trappc4	6	0.0062714	0.22327	626	5	-1.586	0.99772	0.99775	1	22427	0	-1.586
Mup20	5	0.0056388	0.208267	627	3	-2.7783	0.39465	0.56825	0.945946	14150	2	-2.7783
Rpl7a	6	0.0063006	0.22377	628	5	-2.0149	0.99718	0.99723	1	22400	0	-2.0149
Thg1l	6	0.0063124	0.22377	629	4	-2.5708	0.95958	0.95957	1	21630	0	-2.5708
Gltpd1	6	0.0064342	0.227283	630	3	-1.8618	0.2476	0.45118	0.945946	9973	1	-1.8618
Vrk1	6	0.0064993	0.229224	631	4	-1.6061	0.66258	0.78991	0.969562	18301	2	-1.6061
Wdr82	5	0.0058575	0.213908	632	4	-1.8336	0.97919	0.97929	1	22038	0	-1.8336
Sart1	6	0.0065259	0.229806	633	5	-1.436	0.99782	0.99785	1	22430	0	-1.436
Pet112	6	0.0065783	0.231107	634	4	-1.9582	0.9213	0.9234	0.999179	20957	1	-1.9582
Chmp6	6	0.006591	0.231107	635	5	-1.0802	0.93277	0.93326	1	21155	1	-1.0802
Hbs1l	6	0.006594	0.231107	636	5	-1.2237	0.99769	0.99773	1	22426	0	-1.2237
Chchd4	6	0.0066036	0.231107	637	5	-1.7978	0.99117	0.99117	1	22234	0	-1.7978
Spc24	6	0.0066451	0.2322	638	5	-1.9077	0.99721	0.99726	1	22404	0	-1.9077
Rpl29	6	0.0067538	0.234201	639	2	-0.23041	0.95094	0.95107	1	21472	0	-0.23041
Trmt10c	6	0.0067678	0.234201	640	5	-2.4399	0.52805	0.69825	0.955657	16308	1	-2.4399
Eif4e	6	0.0067678	0.234201	641	5	-2.1063	0.97094	0.97099	1	21868	0	-2.1063
Sod1	5	0.0061736	0.221527	642	4	-2.4361	0.95267	0.95278	1	21505	0	-2.4361
Top2a	6	0.0067905	0.234201	643	5	-1.4707	0.71561	0.82927	0.975991	19083	1	-1.4707
Cdipt	6	0.0067927	0.234201	644	5	-2.0143	0.99876	0.99877	1	22473	0	-2.0143
Ikbkap	6	0.0067953	0.234201	645	4	-1.7517	0.95705	0.95708	1	21588	0	-1.7517
Sp110	6	0.0069577	0.238453	646	3	-1.2285	0.95861	0.95865	1	21616	0	-1.2285
Lsg1	6	0.006963	0.238453	647	4	-1.7847	0.91208	0.91623	0.998607	20789	1	-1.7847
Phb	6	0.0069713	0.238453	648	5	-1.9887	0.97106	0.97111	1	21870	0	-1.9887
Osbp	6	0.0070376	0.239999	649	5	-2.2118	0.99336	0.99337	1	22282	0	-2.2118
Pam16	6	0.0071005	0.241779	650	4	-1.6586	0.93428	0.93467	1	21174	1	-1.6586
Cdk9	6	0.0071363	0.24227	651	4	-1.5552	0.91387	0.91758	0.9987	20819	1	-1.5552
Cep135	6	0.0071795	0.243373	652	5	-1.0637	0.76046	0.84564	0.980665	19384	1	-1.0637
Ncapd2	6	0.0071983	0.243646	653	4	-1.8542	0.91905	0.92159	0.998913	20911	1	-1.8542
Acbd6	6	0.0072472	0.244935	654	2	0.20411	0.33526	0.54971	0.945946	12552	3	0.20411
Hist1h2bh	5	0.0067272	0.234201	655	3	-0.70348	0.26059	0.45847	0.945946	10362	2	-0.70348
Rps3	6	0.0073039	0.246385	656	5	-1.9466	0.99538	0.99542	1	22340	0	-1.9466
Tnpo1	6	0.0073118	0.246385	657	3	-1.44	0.44266	0.64493	0.949199	14945	1	-1.44
Gm16381	5	0.0067564	0.234201	658	5	-1.9912	0.99847	0.99849	1	22461	0	-1.9912
Mastl	5	0.0067748	0.234201	659	4	-1.5364	0.92735	0.9275	0.999705	21055	0	-1.5364
Rps25	6	0.0073485	0.246887	660	5	-1.3642	0.88376	0.89772	0.996057	20406	1	-1.3642
Ube2t	6	0.0073816	0.247444	661	5	-1.1128	0.78823	0.85496	0.983895	19570	1	-1.1128
Rsl1d1	6	0.0073869	0.247444	662	4	-2.09	0.94629	0.94641	1	21385	0	-2.09
2410141K09Rik	6	0.0074148	0.248014	663	4	-0.87485	0.90751	0.91294	0.998231	20725	1	-0.87485
4930467E23Rik	3	0.0044277	0.175851	664	3	-3.7205	0.99065	0.99077	1	22224	0	-3.7205
Igbp1	6	0.0074319	0.248217	665	5	-1.9713	0.99794	0.99795	1	22435	0	-1.9713
Gm4567	5	0.0068634	0.235831	666	4	-1.8918	0.94824	0.94837	1	21420	0	-1.8918
Rpp14	6	0.0074559	0.248521	667	5	-1.3515	0.98967	0.98971	1	22202	0	-1.3515
Noc3l	6	0.0074629	0.248521	668	5	-1.6808	0.95159	0.95173	1	21481	0	-1.6808
Dnajc2	6	0.0075065	0.249608	669	5	-2.1135	0.60442	0.74894	0.963896	17434	1	-2.1135
Wdr3	5	0.0069839	0.238526	670	3	-2.2331	0.94156	0.94173	1	21307	0	-2.2331
Gfm1	6	0.0076532	0.254104	671	4	-1.9579	0.93654	0.93681	1	21216	1	-1.9579
H3f3a	5	0.0071166	0.241966	672	3	-2.3989	0.0094664	0.035768	0.945946	659	2	-2.3989
Casp8ap2	6	0.0076641	0.254104	673	5	-2.1821	0.14252	0.32721	0.945946	6614	1	-2.1821
Larp4	6	0.0077759	0.256987	674	4	-1.9367	0.69343	0.8126	0.972924	18746	1	-1.9367
Rad1	6	0.007789	0.256987	675	3	-1.7114	0.99619	0.99623	1	22363	0	-1.7114
Ppan	6	0.0077964	0.256987	676	4	-1.8803	0.94021	0.94044	1	21281	0	-1.8803
Polr3h	6	0.0078309	0.257605	677	4	-1.7928	0.9507	0.95084	1	21468	0	-1.7928
Vars	6	0.0078471	0.257605	678	5	-1.3917	0.042175	0.13021	0.945946	2353	1	-1.3917
Ipo11	6	0.0078492	0.257605	679	4	-2.0857	0.94187	0.9421	1	21309	0	-2.0857
Zc3h8	6	0.0079217	0.259608	680	4	-1.7141	0.97518	0.97528	1	21945	0	-1.7141
Tuba1a	6	0.0080025	0.261721	681	4	-0.77635	0.83932	0.87504	0.989351	19979	1	-0.77635
Ppp1r8	6	0.0080156	0.261721	682	4	-1.7876	0.98983	0.98986	1	22210	0	-1.7876
Wdr61	6	0.0080208	0.261721	683	4	-0.90591	0.56863	0.72481	0.960123	16903	1	-0.90591
Smu1	6	0.0080474	0.262213	684	5	-2.0471	0.76187	0.84607	0.980772	19395	1	-2.0471
Cdc23	6	0.0080832	0.262376	685	5	-1.858	0.64438	0.77689	0.968147	18027	1	-1.858
Bms1	6	0.0080872	0.262376	686	4	-1.6631	0.33953	0.55429	0.945946	12676	1	-1.6631
Rev3l	6	0.0081129	0.262836	687	5	-1.5017	0.98976	0.9898	1	22206	0	-1.5017
mmu-mir-6369	4	0.0062675	0.22327	688	3	-3.4168	0.43816	0.58609	0.945946	14864	1	-3.4168
Dolk	6	0.008126	0.262885	689	5	-1.3634	0.96839	0.96839	1	21805	0	-1.3634
Tbcc	6	0.0081662	0.263802	690	5	-1.7524	0.96088	0.96091	1	21662	0	-1.7524
mmu-mir-8117	4	0.0063151	0.22377	691	4	-2.1173	0.99825	0.99825	1	22454	0	-2.1173
Ttc27	6	0.0081911	0.263802	692	4	-1.7177	0.062826	0.17424	0.945946	3260	1	-1.7177
Mrpl41	6	0.0082186	0.263802	693	5	-1.3464	0.99444	0.99447	1	22316	0	-1.3464
Snrnp35	6	0.0082378	0.263802	694	4	-1.9772	0.96955	0.96959	1	21832	0	-1.9772
Mrpl38	6	0.0082492	0.263802	695	5	-1.803	0.90642	0.91216	0.99819	20706	1	-1.803
Vmn1r28	6	0.0082566	0.263802	696	4	-1.8715	0.99271	0.99271	1	22264	0	-1.8715
Ccna2	6	0.008257	0.263802	697	4	-1.6695	0.63497	0.77018	0.967224	17872	2	-1.6695
Psma6	6	0.008274	0.263802	698	5	-1.6426	0.9986	0.99861	1	22465	0	-1.6426
Map3k7	6	0.0082775	0.263802	699	5	-1.6484	0.9795	0.97959	1	22046	0	-1.6484
Tmem41b	6	0.0082823	0.263802	700	5	-1.3105	0.33881	0.55354	0.945946	12656	1	-1.3105
Zscan4c	3	0.0050865	0.193543	701	3	-1.7793	0.9982	0.99823	1	22449	0	-1.7793
Zbtb8os	6	0.0084006	0.266821	702	5	-1.7309	0.0058919	0.025007	0.945946	442	1	-1.7309
Psmb2	6	0.0084006	0.266821	703	5	-1.2128	0.99809	0.9981	1	22444	0	-1.2128
Rbm25	6	0.0084509	0.267873	704	5	-1.5291	0.93328	0.93372	1	21165	1	-1.5291
Haus1	6	0.0084574	0.267873	705	5	-1.947	0.9987	0.99871	1	22470	0	-1.947
Ppp1r10	6	0.0085286	0.269041	706	5	-1.9519	0.99555	0.9956	1	22343	0	-1.9519
Cul3	6	0.0085299	0.269041	707	4	-1.9044	0.99709	0.99714	1	22394	0	-1.9044
Dnajc11	5	0.0080789	0.262376	708	4	-1.7521	0.84061	0.85228	0.98319	19997	1	-1.7521
Wnk1	6	0.0085622	0.269637	709	4	-1.9767	0.82459	0.86876	0.987615	19857	1	-1.9767
Prdm4	6	0.008577	0.269637	710	5	-1.6605	0.97636	0.97645	1	21976	0	-1.6605
Bcs1l	6	0.0085845	0.269637	711	5	-1.0639	0.99124	0.99124	1	22236	0	-1.0639
Ccdc137	6	0.0086172	0.270082	712	5	-1.3984	0.81254	0.86391	0.986215	19765	1	-1.3984
Gpkow	6	0.0086224	0.270082	713	5	-1.8418	0.99755	0.99758	1	22421	0	-1.8418
Gemin4	6	0.0086464	0.270461	714	5	-1.4947	0.9759	0.97599	1	21962	0	-1.4947
Lce1e	5	0.0082055	0.263802	715	5	-1.3444	0.99784	0.99785	1	22431	0	-1.3444
Olfr746	6	0.0086809	0.270647	716	3	-1.2335	0.17068	0.36185	0.945946	7530	2	-1.2335
Ssu72	6	0.0087001	0.270647	717	4	-1.7726	0.67616	0.79988	0.970484	18507	2	-1.7726
Supt6	6	0.008725	0.27105	718	4	-1.9202	0.61942	0.75939	0.966145	17646	2	-1.9202
Eif2b2	6	0.0087643	0.27144	719	5	-1.6879	0.90264	0.90953	0.997832	20652	1	-1.6879
Eef1g	6	0.0087696	0.27144	720	5	-1.7865	0.84443	0.87737	0.990097	20029	1	-1.7865
Cyth2	6	0.0087735	0.27144	721	4	-1.6243	0.74775	0.84168	0.979113	19319	1	-1.6243
Itgb1	6	0.0088682	0.273624	722	4	-1.4662	0.92179	0.9238	0.999324	20962	1	-1.4662
L2hgdh	6	0.0088682	0.273624	723	3	-0.97679	0.3723	0.58979	0.945946	13547	3	-0.97679
Gm14347	2	0.0037457	0.155578	724	2	-3.091	0.99808	0.99805	1	22443	0	-3.091
Atl2	6	0.0088914	0.273966	725	5	-1.0956	0.97745	0.97752	1	21997	0	-1.0956
Qrsl1	6	0.0089176	0.2744	726	5	-1.9128	0.93612	0.9364	1	21208	1	-1.9128
Lsm5	6	0.0089534	0.274997	727	5	-2.2088	0.96939	0.96943	1	21830	0	-2.2088
Rps6	6	0.0089612	0.274997	728	4	-1.8706	0.6045	0.749	0.963896	17435	1	-1.8706
Sars2	6	0.0090306	0.276555	729	5	-1.1419	0.99719	0.99724	1	22401	0	-1.1419
Peo1	6	0.0090525	0.276555	730	5	-1.505	0.81611	0.86535	0.986758	19787	1	-1.505
Rbm48	6	0.0090551	0.276555	731	4	-1.982	0.97576	0.97585	1	21959	0	-1.982
Rpl30	6	0.0090608	0.276555	732	4	-2.1216	0.88691	0.89955	0.9962	20444	1	-2.1216
Metap1	6	0.0091236	0.277579	733	4	-1.8118	0.99342	0.99343	1	22285	0	-1.8118
Zfp207	6	0.0091311	0.277579	734	4	-2.1617	0.98597	0.98605	1	22153	0	-2.1617
Mfn1	6	0.0091669	0.277868	735	3	-0.38503	0.018681	0.06804	0.945946	1246	3	-0.38503
Syt16	5	0.0086884	0.270647	736	4	-1.4042	0.92262	0.92273	0.998913	20972	0	-1.4042
Cflar	6	0.0091817	0.277868	737	5	-1.9123	0.98188	0.98201	1	22079	0	-1.9123
Yeats2	6	0.0091896	0.277868	738	4	-2.3517	0.68217	0.80434	0.971492	18590	1	-2.3517
Pole3	6	0.0092236	0.278526	739	4	-1.7141	0.89426	0.90408	0.996746	20539	1	-1.7141
Numa1	6	0.0093856	0.282665	740	4	-1.6121	0.66419	0.7911	0.969831	18323	2	-1.6121
Tcea3	6	0.0094061	0.282866	741	4	-1.9492	0.69868	0.81652	0.973699	18825	1	-1.9492
Bub3	6	0.0094188	0.282866	742	5	-2.254	0.98549	0.98558	1	22143	0	-2.254
Etf1	6	0.0094297	0.282866	743	5	-1.5703	0.9888	0.98884	1	22181	0	-1.5703
Gm20736	5	0.0090957	0.277248	744	3	-1.5073	0.67008	0.76843	0.966831	18408	1	-1.5073
Naa25	6	0.0096419	0.288849	745	5	-1.6294	0.99567	0.99571	1	22349	0	-1.6294
Rpl34	2	0.0041448	0.166954	746	2	-3.8376	0.99787	0.99785	1	22433	0	-3.8376
Dhx37	5	0.0092629	0.279341	747	4	-2.5948	0.84469	0.85503	0.983895	20031	1	-2.5948
Ddx56	6	0.0096838	0.289722	748	5	-2.1364	0.99069	0.9907	1	22225	0	-2.1364
Mars2	6	0.0097113	0.290124	749	5	-1.536	0.98898	0.98903	1	22186	0	-1.536
Isy1	6	0.0097371	0.290124	750	3	-1.4165	0.79917	0.85883	0.985171	19654	1	-1.4165
Nol9	6	0.0097414	0.290124	751	5	-1.5078	0.96324	0.96326	1	21709	0	-1.5078
Jtb	6	0.0098135	0.291677	752	4	-1.8246	0.77499	0.85043	0.982602	19470	1	-1.8246
Cdc42	6	0.0099427	0.295131	753	5	-1.791	0.98513	0.98524	1	22133	0	-1.791
Polr3e	6	0.010064	0.297967	754	5	-1.0286	0.99091	0.9909	1	22229	0	-1.0286
Obox3	6	0.010078	0.297978	755	3	-0.21923	0.53331	0.70167	0.956372	16389	2	-0.21923
Mbtps1	6	0.010092	0.297999	756	4	-1.8841	0.7609	0.84578	0.980665	19388	1	-1.8841
Pggt1b	6	0.010119	0.297999	757	4	-2.2155	0.89185	0.90254	0.996666	20503	1	-2.2155
Lsm11	6	0.01012	0.297999	758	2	-0.23489	0.47742	0.66624	0.950564	15509	2	-0.23489
Zfp936	5	0.0097484	0.290124	759	4	-1.705	0.95153	0.95164	1	21479	0	-1.705
Nup214	6	0.010151	0.298178	760	5	-1.6634	0.014687	0.055111	0.945946	1004	1	-1.6634
Nob1	6	0.01017	0.298368	761	5	-1.5029	0.8932	0.90341	0.996666	20525	1	-1.5029
Snip1	6	0.010201	0.298878	762	4	-1.6424	0.96805	0.96806	1	21796	0	-1.6424
Nasp	6	0.010224	0.299182	763	5	-1.5146	0.59729	0.74411	0.963896	17300	1	-1.5146
Fam103a1	6	0.010243	0.299342	764	4	-1.6955	0.51245	0.68816	0.954972	16065	2	-1.6955
Exoc3	6	0.010256	0.299342	765	3	-1.5072	0.40077	0.61977	0.945994	14306	2	-1.5072
4930427A07Rik	6	0.01028	0.299527	766	4	-1.9756	0.96133	0.96139	1	21669	0	-1.9756
Zfp407	6	0.010289	0.299527	767	5	-2.0073	0.67988	0.80266	0.970801	18562	1	-2.0073
Cenpq	6	0.010378	0.301397	768	4	-1.9945	0.90597	0.91182	0.99819	20700	1	-1.9945
Ly6k	6	0.01038	0.301397	769	4	-1.5344	0.44588	0.6469	0.949392	15008	2	-1.5344
Polr3b	6	0.010407	0.301809	770	4	-1.6608	0.85226	0.88107	0.991442	20096	1	-1.6608
Nsmce1	6	0.010462	0.302818	771	5	-1.6218	0.99811	0.99811	1	22445	0	-1.6218
Pafah1b1	6	0.010482	0.302818	772	5	-1.638	0.99327	0.99328	1	22278	0	-1.638
Eftud2	6	0.010484	0.302818	773	5	-1.5693	0.93491	0.93526	1	21184	1	-1.5693
Yy1	6	0.010495	0.302818	774	5	-1.3995	0.99436	0.99438	1	22315	0	-1.3995
Gadd45gip1	6	0.010558	0.304142	775	4	-1.7664	0.81092	0.86328	0.986215	19749	1	-1.7664
Ubb	6	0.010585	0.304142	776	5	-1.9902	0.96191	0.96197	1	21685	0	-1.9902
Rps26	6	0.010595	0.304142	777	4	-1.774	0.97934	0.97943	1	22043	0	-1.774
Dna2	6	0.010595	0.304142	778	2	-0.016143	0.7486	0.84193	0.979144	19324	1	-0.016143
mmu-mir-6946	4	0.0084836	0.268328	779	2	-2.1872	0.14332	0.29023	0.945946	6651	2	-2.1872
Slc4a7	6	0.010657	0.305548	780	4	-1.5485	0.39861	0.61804	0.945994	14256	2	-1.5485
Ccdc86	6	0.010839	0.31035	781	5	-1.5227	0.97253	0.97257	1	21903	0	-1.5227
Nsun4	6	0.010861	0.310595	782	4	-1.7157	0.95583	0.95587	1	21566	0	-1.7157
Urod	6	0.010886	0.31078	783	4	-1.6493	0.20162	0.39837	0.945946	8530	2	-1.6493
Pes1	6	0.010908	0.31078	784	5	-1.6871	0.9908	0.99081	1	22227	0	-1.6871
Hist1h3d	2	0.0047617	0.183361	785	2	-3.0347	0.99755	0.99751	1	22420	0	-3.0347
Rrp9	6	0.010979	0.311869	786	5	-1.6507	0.96888	0.9689	1	21818	0	-1.6507
Krt9	6	0.010985	0.311869	787	3	-1.6119	0.70294	0.81969	0.974509	18888	1	-1.6119
BC003331	6	0.010988	0.311869	788	4	-1.5615	0.89031	0.9016	0.996545	20486	1	-1.5615
Rpap2	6	0.011096	0.313537	789	4	-2.0378	0.94978	0.94989	1	21454	0	-2.0378
Rpl38	6	0.011106	0.313537	790	5	-1.8482	0.99091	0.99091	1	22230	0	-1.8482
Trappc3	6	0.011124	0.313537	791	5	-1.2634	0.96861	0.96863	1	21813	0	-1.2634
Cenpm	6	0.011125	0.313537	792	5	-1.9973	0.98187	0.982	1	22078	0	-1.9973
Tsg101	6	0.011135	0.313537	793	4	-1.7391	0.44015	0.6434	0.949199	14895	2	-1.7391
Trim28	6	0.011154	0.313537	794	5	-1.22	0.86881	0.88939	0.994472	20236	1	-1.22
Rheb	6	0.011157	0.313537	795	4	-1.703	0.4505	0.6497	0.949592	15077	1	-1.703
Cyp1b1	6	0.011259	0.316017	796	3	-0.54605	0.13108	0.30642	0.945946	6151	2	-0.54605
Ccnb1	6	0.011322	0.317376	797	5	-1.5645	0.972	0.97204	1	21890	0	-1.5645
Nudt21	6	0.011355	0.317901	798	4	-1.6138	0.21191	0.41028	0.945946	8855	1	-1.6138
Ankrd40	6	0.011462	0.320343	799	5	-1.4615	0.91178	0.91599	0.998607	20785	1	-1.4615
Rnps1	5	0.011111	0.313537	800	3	-2.1942	0.78401	0.81883	0.974171	19538	1	-2.1942
Tbca	6	0.01147	0.320343	801	5	-1.6571	0.95379	0.95392	1	21529	0	-1.6571
Kansl2	6	0.0115	0.320784	802	5	-1.457	0.98146	0.98157	1	22072	0	-1.457
Gnb2l1	6	0.011521	0.320985	803	4	-1.8809	0.020776	0.074753	0.945946	1353	2	-1.8809
Pkn2	6	0.011585	0.322365	804	4	-1.7008	0.93252	0.93303	1	21151	1	-1.7008
Polr2l	6	0.011622	0.32289	805	5	-1.7128	0.86411	0.88694	0.993529	20199	1	-1.7128
Clasrp	6	0.011646	0.32289	806	4	-1.4701	0.56493	0.72229	0.959357	16848	2	-1.4701
Zfp825	6	0.011647	0.32289	807	4	-1.1844	0.80648	0.86158	0.985851	19712	1	-1.1844
Brwd1	6	0.01172	0.323989	808	4	-1.9016	0.82784	0.87012	0.987869	19888	1	-1.9016
Spcs2	6	0.011729	0.323989	809	5	-1.4834	0.99818	0.99819	1	22447	0	-1.4834
Cndp1	6	0.011761	0.324462	810	3	-1.3781	0.71119	0.82593	0.975619	19010	1	-1.3781
Ebna1bp2	6	0.0118	0.325139	811	4	-1.6516	0.78924	0.85531	0.983895	19581	1	-1.6516
mmu-mir-466f-2	2	0.0052192	0.196614	812	2	-4.5555	0.93249	0.93255	1	21150	0	-4.5555
Hist1h3g	6	0.011872	0.326007	813	5	-1.5503	0.83699	0.87403	0.989132	19958	1	-1.5503
Thoc1	6	0.011874	0.326007	814	4	-1.9161	0.91719	0.92014	0.9989	20873	1	-1.9161
Nsmce4a	6	0.012079	0.330828	815	5	-1.1224	0.99755	0.99758	1	22419	0	-1.1224
Ap2s1	6	0.012095	0.330871	816	5	-1.6011	0.99377	0.99378	1	22301	0	-1.6011
Nelfcd	5	0.01187	0.326007	817	4	-2.3235	0.99204	0.99205	1	22251	0	-2.3235
Smc1a	6	0.012194	0.333168	818	3	-0.56299	0.35487	0.571	0.945946	13083	1	-0.56299
Hist1h2bj	3	0.0077562	0.256783	819	1	0.47806	0.3	0.43639	0.945946	11541	2	0.47806
Zcchc9	6	0.012292	0.33461	820	5	-1.2813	0.95735	0.95736	1	21596	0	-1.2813
mmu-mir-8101	4	0.0099702	0.295561	821	3	-3.6646	0.31531	0.46446	0.945946	11991	1	-3.6646
Mrpl10	6	0.012306	0.33461	822	5	-1.5271	0.97103	0.97108	1	21869	0	-1.5271
Dtl	6	0.012445	0.336757	823	5	-1.7764	0.93416	0.93455	1	21173	1	-1.7764
Sf3a2	6	0.012459	0.336757	824	4	-1.8887	0.32996	0.54389	0.945946	12406	2	-1.8887
Eif2b1	6	0.012488	0.336757	825	5	-1.6782	0.97356	0.97362	1	21918	0	-1.6782
Tpi1	6	0.012488	0.336757	826	4	-1.1129	0.94817	0.9483	1	21419	0	-1.1129
Rnf40	6	0.012542	0.337788	827	3	-1.2628	0.55757	0.71746	0.958453	16743	2	-1.2628
Pole2	6	0.012571	0.337788	828	4	-1.8166	0.7307	0.8366	0.977451	19227	1	-1.8166
Isg20l2	6	0.012585	0.337788	829	5	-1.5828	0.98411	0.98422	1	22116	0	-1.5828
Supv3l1	6	0.012586	0.337788	830	5	-1.4728	0.97807	0.97815	1	22013	0	-1.4728
Sf3b3	6	0.01262	0.337902	831	4	-1.5824	0.3535	0.56953	0.945946	13039	1	-1.5824
Gtf2h3	6	0.01262	0.337902	832	4	-1.5047	0.044777	0.13585	0.945946	2469	2	-1.5047
Eno1	5	0.012444	0.336757	833	5	-1.2796	0.99709	0.9971	1	22395	0	-1.2796
Prpf4	6	0.012695	0.338955	834	4	-2.0876	0.98324	0.98335	1	22102	0	-2.0876
Ints1	6	0.012704	0.338955	835	5	-1.578	0.98544	0.98554	1	22141	0	-1.578
Rpl34-ps1	5	0.012467	0.336757	836	5	-1.674	0.99709	0.99709	1	22393	0	-1.674
Dbpht2	6	0.012719	0.338955	837	3	-0.79811	0.32966	0.54358	0.945946	12398	2	-0.79811
Pabpc4	6	0.012752	0.339428	838	4	-1.5684	0.89852	0.9068	0.996842	20601	1	-1.5684
Gdf1	6	0.012871	0.340988	839	3	-0.22195	0.097408	0.24332	0.945946	4747	2	-0.22195
Tmem100	6	0.012871	0.340988	840	3	-0.49041	0.29552	0.50549	0.945946	11417	3	-0.49041
Coil	6	0.012871	0.340988	841	3	-0.59216	0.036424	0.11749	0.945946	2104	2	-0.59216
Sepsecs	6	0.012871	0.340988	842	4	-1.5897	0.95084	0.95096	1	21471	0	-1.5897
Ncapg2	5	0.012718	0.338955	843	5	-1.0947	0.99702	0.99703	1	22390	0	-1.0947
Api5	6	0.012967	0.343132	844	4	-1.8177	0.88778	0.90007	0.9962	20454	1	-1.8177
Esd	6	0.013045	0.344397	845	3	-0.54001	0.017114	0.062976	0.945946	1156	3	-0.54001
Polr3f	6	0.013062	0.344445	846	5	-1.6608	0.92871	0.92963	1	21078	1	-1.6608
Med7	6	0.013136	0.346	847	4	-1.5923	0.6159	0.75691	0.965507	17594	2	-1.5923
Samm50	6	0.013174	0.346586	848	4	-1.9922	0.16931	0.36021	0.945946	7476	1	-1.9922
Rad50	6	0.013267	0.3482	849	3	-1.5155	0.92016	0.92248	0.998913	20933	1	-1.5155
Rragc	6	0.013339	0.349307	850	5	-1.0354	0.99598	0.99602	1	22355	0	-1.0354
Zfp780b	4	0.010906	0.31078	851	2	-2.0384	0.7948	0.80017	0.970484	19615	1	-2.0384
Txn1	6	0.013445	0.351451	852	4	-1.8745	0.97736	0.97744	1	21993	0	-1.8745
Mettl14	6	0.013467	0.351451	853	3	-1.0455	0.66222	0.78965	0.969358	18298	2	-1.0455
Dnaja1	6	0.013467	0.351451	854	4	-1.4461	0.69454	0.81339	0.97305	18765	2	-1.4461
Kansl1	6	0.013504	0.352014	855	4	-1.6359	0.92148	0.92354	0.999269	20958	1	-1.6359
Dcaf13	5	0.013281	0.3482	856	3	-2.3371	0.27583	0.47626	0.945946	10836	1	-2.3371
Arpc4	6	0.013535	0.352417	857	5	-0.99286	0.99603	0.99607	1	22358	0	-0.99286
Gm21637	3	0.0086849	0.270647	858	3	-1.6381	0.99688	0.99694	1	22384	0	-1.6381
Txnl4b	6	0.013602	0.353739	859	4	-1.725	0.20252	0.39943	0.945946	8558	2	-1.725
Incenp	6	0.013624	0.353912	860	4	-1.4906	0.93046	0.93116	1	21108	1	-1.4906
Prss39	6	0.013756	0.35694	861	3	-0.5736	0.0084799	0.034182	0.945946	602	3	-0.5736
Rbx1	6	0.013809	0.35789	862	4	-1.7122	0.94416	0.94431	1	21348	0	-1.7122
Cars	6	0.013922	0.359998	863	4	-1.8295	0.67301	0.7976	0.970484	18444	1	-1.8295
Nudcd3	6	0.013951	0.360332	864	4	-1.6928	0.19512	0.39065	0.945946	8318	2	-1.6928
Gtf3c4	6	0.014072	0.362719	865	4	-1.5882	0.99288	0.9929	1	22270	0	-1.5882
Pola2	6	0.014075	0.362719	866	5	-1.3724	0.99779	0.99782	1	22429	0	-1.3724
Setbp1	6	0.014113	0.362725	867	3	-0.51402	0.052007	0.15144	0.945946	2791	2	-0.51402
Fam114a1	6	0.014113	0.362725	868	4	-1.2567	0.54118	0.70684	0.957125	16498	2	-1.2567
Dctn3	6	0.014139	0.362725	869	4	-1.6677	0.97342	0.97347	1	21914	0	-1.6677
Atp5e	6	0.014164	0.362941	870	3	-1.1685	0.90859	0.91369	0.998244	20742	1	-1.1685
Vmn1r117	3	0.0091494	0.277765	871	3	-2.4989	0.9967	0.99678	1	22380	0	-2.4989
Wdr75	6	0.014191	0.363224	872	5	-1.8004	0.97817	0.97825	1	22016	0	-1.8004
Gm7609	6	0.014254	0.364445	873	4	-1.7682	0.035224	0.1148	0.945946	2054	1	-1.7682
Ppp6c	6	0.01433	0.365952	874	3	-0.93963	0.98618	0.98624	1	22157	0	-0.93963
Rpl22l1	6	0.014348	0.365964	875	5	-1.0963	0.73651	0.83831	0.978354	19249	1	-1.0963
Cramp1l	6	0.014367	0.365964	876	2	0.092426	0.22366	0.42384	0.945946	9229	2	0.092426
Hmgb4	6	0.014424	0.36672	877	3	-0.48879	0.69548	0.81411	0.973237	18781	2	-0.48879
Haus8	6	0.014498	0.367771	878	4	-1.4366	0.6423	0.7754	0.967294	18006	2	-1.4366
Psmg4	6	0.014527	0.368055	879	4	-1.0708	0.50581	0.68395	0.953844	15960	2	-1.0708
Ssbp1	6	0.014542	0.368055	880	3	-0.79987	0.98685	0.98687	1	22166	0	-0.79987
Txnl4a	6	0.014853	0.37465	881	5	-1.1668	0.6897	0.80991	0.972353	18693	1	-1.1668
Dkc1	6	0.014871	0.37465	882	5	-1.7282	0.97324	0.97328	1	21911	0	-1.7282
Wdr12	6	0.014885	0.37465	883	4	-1.7447	0.85865	0.88417	0.992628	20148	1	-1.7447
Gm3448	2	0.0068145	0.234506	884	2	-2.3761	0.99651	0.9965	1	22372	0	-2.3761
Ing3	6	0.015004	0.376352	885	5	-1.7587	0.9963	0.99635	1	22368	0	-1.7587
Rpp30	6	0.015005	0.376352	886	5	-1.3194	0.99534	0.99538	1	22338	0	-1.3194
Gm15319	4	0.012456	0.336757	887	2	-2.0749	0.42103	0.56907	0.945946	14627	1	-2.0749
Dars2	6	0.015122	0.378516	888	5	-0.88321	0.99768	0.99771	1	22425	0	-0.88321
Polg	6	0.015217	0.38006	889	5	-1.7965	0.97675	0.97683	1	21988	0	-1.7965
Gpn1	5	0.014845	0.37465	890	4	-1.5505	0.51778	0.66685	0.950878	16142	1	-1.5505
Smim6	6	0.01535	0.38186	891	3	-0.70425	0.64861	0.77988	0.96853	18090	2	-0.70425
Pogz	6	0.01535	0.38186	892	4	-0.95465	0.59588	0.74317	0.963896	17281	1	-0.95465
Eprs	6	0.015357	0.38186	893	5	-1.3843	0.67409	0.79839	0.970484	18467	1	-1.3843
Tex36	6	0.015373	0.38186	894	3	-1.2334	0.87427	0.89234	0.995144	20298	1	-1.2334
Rcc1	6	0.015418	0.382318	895	3	-1.2759	0.95026	0.95038	1	21461	0	-1.2759
Atp5j2	6	0.015435	0.382318	896	5	-1.7184	0.97083	0.97087	1	21864	0	-1.7184
Alkbh5	6	0.015442	0.382318	897	3	-0.79273	0.29405	0.50387	0.945946	11364	3	-0.79273
Taf1d	5	0.015019	0.376352	898	4	-2.1289	0.98887	0.98892	1	22182	0	-2.1289
Eif5b	6	0.015521	0.383833	899	4	-1.5802	0.94573	0.94585	1	21380	0	-1.5802
Slc35b3	6	0.015649	0.386597	900	2	-0.1612	0.59103	0.73989	0.963253	17214	1	-0.1612
9030624G23Rik	6	0.015759	0.388832	901	4	-1.653	0.34079	0.55566	0.945946	12702	2	-1.653
Rnf31	6	0.015791	0.388832	902	5	-1.4825	0.98673	0.98675	1	22165	0	-1.4825
Dars	6	0.015813	0.388936	903	4	-1.5481	0.75602	0.84422	0.980289	19358	1	-1.5481
Btf3	6	0.015831	0.388954	904	4	-1.7055	0.26563	0.47188	0.945946	10511	1	-1.7055
Mrps26	6	0.015884	0.389841	905	5	-1.6208	0.98272	0.98283	1	22093	0	-1.6208
Vmn2r35	2	0.0073485	0.246887	906	2	-4.8641	0.98977	0.98981	1	22207	0	-4.8641
Bub1b	6	0.016009	0.392067	907	4	-2.0624	0.93559	0.93589	1	21196	1	-2.0624
Eif3e	6	0.016249	0.396802	908	4	-1.1107	0.95496	0.95504	1	21548	0	-1.1107
Cenpo	6	0.016367	0.399111	909	3	-0.84623	0.70609	0.82209	0.975146	18931	2	-0.84623
Atp6v1d	5	0.015774	0.388832	910	4	-2.1039	0.43315	0.59842	0.945946	14796	1	-2.1039
Alg1	6	0.016419	0.399959	911	5	-1.071	0.99472	0.99476	1	22325	0	-1.071
Gm13826	6	0.016483	0.401048	912	3	-1.7069	0.95821	0.95823	1	21609	0	-1.7069
Sec61a1	6	0.016503	0.401048	913	5	-1.8536	0.98923	0.98925	1	22193	0	-1.8536
Trmu	6	0.016517	0.401048	914	2	0.055653	0.63757	0.77201	0.967224	17915	2	0.055653
Gm6890	5	0.015937	0.390714	915	3	-1.7638	0.49585	0.64878	0.949592	15796	2	-1.7638
Nop14	6	0.016773	0.40638	916	5	-1.4148	0.31767	0.53023	0.945946	12065	1	-1.4148
Trmt61a	6	0.016889	0.408543	917	5	-1.3575	0.068044	0.18489	0.945946	3493	1	-1.3575
Cpsf2	6	0.016898	0.408543	918	5	-1.6862	0.94969	0.9498	1	21452	0	-1.6862
Slc35a1	5	0.016255	0.396802	919	3	-1.0245	0.89285	0.89327	0.995248	20518	1	-1.0245
Nup107	6	0.017106	0.412687	920	3	-1.0752	0.60166	0.74706	0.963896	17381	2	-1.0752
Nop9	6	0.017167	0.413272	921	5	-1.7239	0.91215	0.91628	0.998607	20792	1	-1.7239
Hscb	6	0.017224	0.41356	922	4	-0.92876	0.91852	0.92116	0.998913	20899	1	-0.92876
9430016H08Rik	6	0.017233	0.41356	923	4	-1.7375	0.50065	0.68071	0.953209	15882	2	-1.7375
Ccnh	6	0.017285	0.41356	924	4	-1.5754	0.99708	0.99713	1	22391	0	-1.5754
E130309D02Rik	6	0.017288	0.41356	925	4	-1.6386	0.9198	0.92218	0.998913	20926	1	-1.6386
Tmem55b	6	0.017288	0.41356	926	2	0.13482	0.13485	0.31334	0.945946	6306	2	0.13482
Rqcd1	6	0.017288	0.41356	927	5	-0.79155	0.68748	0.8082	0.971861	18667	1	-0.79155
Pdcd7	6	0.017384	0.414613	928	5	-1.5393	0.12791	0.30058	0.945946	6006	1	-1.5393
Rpf1	6	0.017407	0.414613	929	4	-1.5382	0.71737	0.83062	0.976179	19114	1	-1.5382
Tpr	6	0.017428	0.414613	930	5	-1.424	0.92922	0.93009	1	21086	1	-1.424
Mrps16	6	0.017432	0.414613	931	4	-1.4706	0.97547	0.97556	1	21954	0	-1.4706
Mis12	6	0.017554	0.416405	932	5	-1.5094	0.98531	0.98541	1	22136	0	-1.5094
Gm3259	4	0.014805	0.374306	933	3	-1.831	0.19018	0.34088	0.945946	8164	1	-1.831
Fbl	6	0.017572	0.416405	934	4	-1.6186	0.74929	0.84215	0.979295	19329	1	-1.6186
Itgav	6	0.017628	0.416421	935	5	-1.4276	0.99826	0.99827	1	22455	0	-1.4276
Timm23	6	0.017658	0.416421	936	5	-1.8709	0.99693	0.99698	1	22388	0	-1.8709
Atp5f1	6	0.017658	0.416421	937	5	-1.3524	0.99107	0.99108	1	22232	0	-1.3524
Zscan4b	4	0.014913	0.374948	938	3	-1.4557	0.40736	0.55557	0.945946	14422	1	-1.4557
Abcd3	6	0.017696	0.416421	939	4	-1.7536	0.71613	0.82967	0.975991	19098	1	-1.7536
Ppa2	6	0.017704	0.416421	940	5	-1.7963	0.87673	0.8937	0.995412	20326	1	-1.7963
Tmed10	5	0.016933	0.408951	941	4	-1.1806	0.9705	0.97055	1	21853	0	-1.1806
Ywhaz	6	0.017781	0.417425	942	5	-1.5777	0.6121	0.75425	0.965233	17540	1	-1.5777
Dhrs7b	6	0.017876	0.418803	943	3	-0.96805	0.82287	0.86807	0.987586	19841	1	-0.96805
mmu-mir-7667	4	0.015156	0.378961	944	2	-1.5937	0.32466	0.47358	0.945946	12253	2	-1.5937
Dnttip2	6	0.018011	0.421528	945	5	-0.93757	0.92387	0.92551	0.99938	20997	1	-0.93757
Htatsf1	6	0.018043	0.421838	946	3	-1.1235	0.84535	0.87778	0.9902	20038	1	-1.1235
Scgb1b7	3	0.011982	0.32857	947	2	-2.8475	0.82564	0.82553	0.975619	19865	0	-2.8475
Olfr313	6	0.018215	0.42532	948	2	0.48663	0.18622	0.38019	0.945946	8047	3	0.48663
G3bp1	6	0.01823	0.42532	949	4	-1.6159	0.97838	0.97848	1	22019	0	-1.6159
Stk38l	6	0.018346	0.427595	950	3	-1.3023	0.63779	0.77216	0.967224	17920	2	-1.3023
Preb	5	0.017435	0.414613	951	4	-1.5394	0.90174	0.90178	0.996545	20643	1	-1.5394
Lsm4	5	0.017445	0.414613	952	3	-0.92128	0.55537	0.69827	0.955657	16712	2	-0.92128
Hpgds	5	0.01746	0.414613	953	3	-1.4732	0.26523	0.46466	0.945946	10500	2	-1.4732
Zfp653	6	0.01852	0.431217	954	3	-0.8705	0.39111	0.6101	0.945994	14051	2	-0.8705
Ubl5	5	0.017659	0.416421	955	3	-1.9913	0.94063	0.94081	1	21286	0	-1.9913
Cops4	6	0.018664	0.433666	956	5	-1.6907	0.98391	0.984	1	22113	0	-1.6907
Rasgrp2	6	0.018698	0.433666	957	4	-1.6365	0.81716	0.86575	0.98678	19795	1	-1.6365
Ncapd3	6	0.018718	0.433666	958	4	-1.4784	0.95493	0.95501	1	21546	0	-1.4784
Ccr7	6	0.018872	0.436709	959	3	-0.91423	0.82973	0.87088	0.98787	19901	1	-0.91423
Fadd	6	0.019013	0.43864	960	5	-1.464	0.91014	0.91476	0.998542	20760	1	-1.464
Xrn2	6	0.019067	0.439442	961	4	-1.4449	0.97812	0.9782	1	22014	0	-1.4449
Rgs7bp	6	0.019136	0.439671	962	3	-0.54717	0.83806	0.8745	0.989324	19970	1	-0.54717
Ip6k2	6	0.019136	0.439671	963	3	-0.59062	0.16111	0.35037	0.945946	7212	2	-0.59062
Lhb	6	0.019136	0.439671	964	2	-0.37443	0.012256	0.047019	0.945946	842	1	-0.37443
Nup35	6	0.019304	0.443104	965	4	-1.4711	0.95214	0.95228	1	21497	0	-1.4711
Itln1	6	0.019432	0.444292	966	4	-1.3103	0.84541	0.87781	0.9902	20039	1	-1.3103
Fnta	6	0.019433	0.444292	967	5	-1.2631	0.91222	0.91635	0.998607	20795	1	-1.2631
Prelid1	6	0.019435	0.444292	968	4	-1.5239	0.99395	0.99396	1	22308	0	-1.5239
Cldn2	6	0.019511	0.445589	969	4	-1.5585	0.72955	0.83626	0.977393	19223	1	-1.5585
Dux	3	0.013031	0.344397	970	3	-3.1352	0.98473	0.98491	1	22125	0	-3.1352
Uck1	6	0.01956	0.446257	971	5	-1.4182	0.95352	0.95365	1	21522	0	-1.4182
Fnip1	6	0.019613	0.447012	972	3	-0.12789	0.049038	0.14504	0.945946	2661	3	-0.12789
Dhx8	6	0.019686	0.448234	973	4	-1.6775	0.37002	0.58737	0.945946	13485	1	-1.6775
Aars2	6	0.019742	0.449065	974	5	-1.4201	0.96416	0.96417	1	21732	0	-1.4201
Rcl1	6	0.019872	0.451552	975	4	-1.3554	0.552	0.71382	0.957835	16659	1	-1.3554
Gm5168	3	0.013269	0.3482	976	2	-3.1875	0.26692	0.39652	0.945946	10558	1	-3.1875
Tipin	6	0.019894	0.451615	977	4	-1.5558	0.78914	0.85527	0.983895	19580	1	-1.5558
Pola1	6	0.019989	0.453322	978	5	-1.0176	0.67054	0.7958	0.970484	18413	1	-1.0176
Rpusd4	6	0.02001	0.453324	979	5	-1.0479	0.97372	0.9738	1	21921	0	-1.0479
Cyyr1	6	0.020068	0.45393	980	3	-0.50337	0.67566	0.79953	0.970484	18496	2	-0.50337
Zfp335	6	0.020076	0.45393	981	5	-1.5446	0.97238	0.97243	1	21900	0	-1.5446
Defa26	5	0.018945	0.43761	982	4	-1.806	0.93149	0.93173	1	21127	0	-1.806
Mup4	5	0.018949	0.43761	983	4	-1.2143	0.9197	0.91979	0.9989	20923	0	-1.2143
Lyrm4	6	0.020285	0.457874	984	4	-1.1728	0.96161	0.96166	1	21678	0	-1.1728
Hars	6	0.020291	0.457874	985	5	-1.3806	0.52934	0.69915	0.955657	16336	1	-1.3806
Mrps30	6	0.020467	0.461385	986	3	-0.46655	0.48962	0.67378	0.951312	15709	1	-0.46655
Tbcb	6	0.020508	0.461841	987	5	-1.4262	0.99829	0.99831	1	22456	0	-1.4262
Noc4l	6	0.020601	0.462989	988	4	-1.2892	0.65177	0.78215	0.96857	18143	1	-1.2892
Kif18b	6	0.020607	0.462989	989	4	-1.6178	0.94951	0.94963	1	21448	0	-1.6178
Gabrp	6	0.02062	0.462989	990	2	-0.19973	0.60703	0.75073	0.964265	17470	2	-0.19973
Tonsl	6	0.020646	0.463119	991	5	-1.4983	0.90238	0.90937	0.997811	20648	1	-1.4983
Gm13242	5	0.019388	0.444292	992	3	-1.3752	0.91333	0.91327	0.998231	20810	0	-1.3752
Vps53	6	0.020745	0.464877	993	3	-0.6775	0.95049	0.95061	1	21463	0	-0.6775
Sf3b5	6	0.020819	0.465703	994	5	-1.1025	0.97849	0.97858	1	22024	0	-1.1025
Tomm7	6	0.020866	0.466033	995	5	-1.3981	0.92577	0.92712	0.999624	21031	1	-1.3981
Naf1	6	0.020884	0.466033	996	5	-1.0409	0.9945	0.99453	1	22319	0	-1.0409
Lrig2	6	0.020899	0.466033	997	4	-1.3841	0.21108	0.40931	0.945946	8830	1	-1.3841
Rnf139	6	0.021001	0.466914	998	2	0.40403	0.088016	0.22492	0.945946	4354	3	0.40403
Gemin5	6	0.021072	0.467841	999	4	-1.3539	0.94105	0.94128	1	21297	0	-1.3539
Eif3c	6	0.021172	0.468674	1000	5	-1.1725	0.99692	0.99698	1	22387	0	-1.1725
Gnl2	6	0.0212	0.468674	1001	5	-1.4851	0.90155	0.90879	0.997447	20640	1	-1.4851
Glrx3	6	0.021217	0.468674	1002	4	-1.5539	0.99661	0.99665	1	22379	0	-1.5539
1700094D03Rik	6	0.021245	0.468674	1003	4	-1.3681	0.93734	0.93761	1	21224	1	-1.3681
Pigt	6	0.021348	0.469461	1004	4	-1.5642	0.95126	0.9514	1	21476	0	-1.5642
Mad2l1	6	0.021356	0.469461	1005	4	-1.6289	0.97541	0.9755	1	21951	0	-1.6289
Sgtb	6	0.02139	0.469461	1006	4	-1.4257	0.93149	0.93207	1	21125	1	-1.4257
Gm8660	2	0.010131	0.297999	1007	2	-4.2409	0.91973	0.9198	0.9989	20924	0	-4.2409
6330416G13Rik	6	0.021411	0.469461	1008	4	-1.5593	0.22089	0.42061	0.945946	9151	1	-1.5593
Cog6	6	0.021419	0.469461	1009	3	-1.1839	0.97522	0.97531	1	21946	0	-1.1839
Cstf3	6	0.021426	0.469461	1010	4	-1.3904	0.99482	0.99487	1	22327	0	-1.3904
Ndnl2	6	0.021446	0.469461	1011	4	-1.4568	0.99251	0.99252	1	22261	0	-1.4568
Hist1h3i	3	0.014494	0.367771	1012	2	-3.716	0.95514	0.95537	1	21554	0	-3.716
Nol6	6	0.021558	0.470998	1013	4	-1.3832	0.33697	0.55157	0.945946	12608	1	-1.3832
Aars	6	0.021594	0.471326	1014	3	-1.3798	0.9336	0.93401	1	21167	1	-1.3798
Mapkapk3	6	0.021636	0.471543	1015	4	-1.5858	0.58428	0.7352	0.962415	17121	1	-1.5858
Atp6v0d1	6	0.021645	0.471543	1016	4	-1.3372	0.97899	0.97909	1	22030	0	-1.3372
Polr3c	6	0.021693	0.472117	1017	4	-1.2972	0.33286	0.54709	0.945946	12492	2	-1.2972
mmu-mir-1954	4	0.018721	0.433666	1018	1	-0.46842	0.91576	0.91569	0.998607	20853	0	-0.46842
Polr2b	6	0.021957	0.476959	1019	4	-0.92602	0.20934	0.4073	0.945946	8768	1	-0.92602
Fbxl13	6	0.022214	0.481613	1020	3	-1.2201	0.35061	0.5664	0.945946	12960	2	-1.2201
Olfr448	6	0.0224	0.485059	1021	5	-1.4804	0.99674	0.99678	1	22383	0	-1.4804
Gtf3c6	6	0.022416	0.485059	1022	3	-1.07	0.91453	0.91808	0.9987	20832	1	-1.07
Donson	5	0.020941	0.466265	1023	3	-1.7244	0.18168	0.35131	0.945946	7903	1	-1.7244
Gm5409	5	0.020951	0.466265	1024	3	-1.9413	0.38753	0.56255	0.945946	13946	1	-1.9413
Prkcdbp	6	0.022701	0.489987	1025	2	0.35656	0.11089	0.26905	0.945946	5290	3	0.35656
Rars2	6	0.02278	0.489987	1026	5	-1.2177	0.75438	0.84371	0.979956	19349	1	-1.2177
Fus	6	0.022844	0.489987	1027	5	-1.2214	0.61592	0.75693	0.965507	17595	1	-1.2214
Stox1	6	0.022881	0.489987	1028	3	-1.7079	0.71563	0.82928	0.975991	19084	1	-1.7079
Kdm2a	6	0.022881	0.489987	1029	4	-1.9759	0.58111	0.73308	0.961982	17071	2	-1.9759
Meis1	6	0.022881	0.489987	1030	3	-0.92263	0.4886	0.67317	0.951312	15690	1	-0.92263
Tbc1d25	6	0.022881	0.489987	1031	3	-1.5586	0.81203	0.8637	0.986215	19760	1	-1.5586
Smarcad1	6	0.022881	0.489987	1032	3	-1.3572	0.21182	0.41016	0.945946	8850	2	-1.3572
D830030K20Rik	1	0.00562	0.207913	1033	1	-6.192	0.99434	0.99438	1	22313	0	-6.192
Tceb1	6	0.023254	0.496904	1034	5	-0.93903	0.98528	0.98538	1	22135	0	-0.93903
Eftud1	6	0.023291	0.496904	1035	4	-1.498	0.99473	0.99476	1	22326	0	-1.498
Dad1	6	0.023323	0.496904	1036	4	-1.3635	0.99502	0.99506	1	22333	0	-1.3635
Ttll2	6	0.023336	0.496904	1037	3	-0.73429	0.33688	0.55148	0.945946	12606	3	-0.73429
Mark4	6	0.023336	0.496904	1038	3	0.068477	0.070803	0.19054	0.945946	3608	3	0.068477
Idh3b	6	0.023336	0.496904	1039	2	0.21455	0.060993	0.1704	0.945946	3177	3	0.21455
Hist1h2bp	6	0.023497	0.499453	1040	2	-0.4784	0.74207	0.83997	0.97864	19289	1	-0.4784
Safb2	6	0.023499	0.499453	1041	3	-1.4404	0.5553	0.71598	0.958187	16710	1	-1.4404
Dhdds	6	0.02361	0.500453	1042	4	-1.3981	0.57453	0.72872	0.961084	16986	1	-1.3981
Mrpl21	6	0.023733	0.500453	1043	5	-1.1999	0.9932	0.99322	1	22276	0	-1.1999
Prpf4b	6	0.023743	0.500453	1044	4	-1.3264	0.64755	0.77912	0.968405	18070	2	-1.3264
Tubgcp2	6	0.023759	0.500453	1045	2	-0.37012	0.55995	0.71898	0.958845	16771	2	-0.37012
Ppp1ca	6	0.023759	0.500453	1046	2	-0.26593	0.98138	0.9815	1	22069	0	-0.26593
Dis3	6	0.023789	0.500453	1047	3	-1.2592	0.61098	0.75346	0.965098	17523	2	-1.2592
Zfp131	6	0.023826	0.500453	1048	3	-1.2066	0.33185	0.54599	0.945946	12469	2	-1.2066
Vps29	6	0.023862	0.500453	1049	4	-1.564	0.0018549	0.0093328	0.945946	172	1	-1.564
Fermt2	6	0.023874	0.500453	1050	5	-1.5522	0.97053	0.97055	1	21854	0	-1.5522
Fkbp14	6	0.023877	0.500453	1051	2	0.297	0.077828	0.20467	0.945946	3917	3	0.297
Med26	6	0.023963	0.501792	1052	4	-1.4121	0.94357	0.94373	1	21337	0	-1.4121
Rab6a	6	0.024006	0.502215	1053	4	-1.4045	0.97619	0.97627	1	21969	0	-1.4045
Mrpl23	6	0.024084	0.502999	1054	5	-1.5758	0.98692	0.98695	1	22167	0	-1.5758
Rpl36al	6	0.024108	0.502999	1055	5	-1.1012	0.99814	0.99814	1	22446	0	-1.1012
Ppp2ca	6	0.024114	0.502999	1056	3	-0.43489	0.30231	0.51308	0.945946	11601	3	-0.43489
Wars2	6	0.024132	0.502999	1057	5	-1.5485	0.16135	0.35066	0.945946	7221	1	-1.5485
Olfr193	6	0.024214	0.504074	1058	5	-0.86834	0.63544	0.77051	0.967224	17881	1	-0.86834
Ruvbl2	6	0.024228	0.504074	1059	5	-1.5428	0.98343	0.98353	1	22103	0	-1.5428
Gm5797	4	0.020823	0.465703	1060	3	-1.5769	0.88533	0.88524	0.992807	20422	0	-1.5769
Tax1bp1	6	0.024319	0.50472	1061	4	-1.5859	0.53837	0.70494	0.956897	16458	2	-1.5859
Cdk5rap3	6	0.024372	0.50472	1062	4	-1.4838	0.89065	0.9018	0.996545	20490	1	-1.4838
Wdr73	6	0.024375	0.50472	1063	5	-1.091	0.97914	0.97923	1	22036	0	-1.091
Ddx51	6	0.024379	0.50472	1064	5	-0.96483	0.96929	0.96932	1	21827	0	-0.96483
Rfc2	6	0.024386	0.50472	1065	3	-0.58007	0.94497	0.94511	1	21365	0	-0.58007
G6pdx	6	0.024393	0.50472	1066	4	-1.4115	0.23397	0.4357	0.945946	9564	2	-1.4115
Plk4	6	0.024425	0.504937	1067	3	-1.1179	0.90056	0.90816	0.99743	20625	1	-1.1179
Vmn2r42	2	0.011688	0.323644	1068	2	-1.9899	0.99394	0.99394	1	22307	0	-1.9899
C030046E11Rik	6	0.024464	0.504955	1069	5	-1.7301	0.96324	0.96326	1	21708	0	-1.7301
Shfm1	5	0.022475	0.485871	1070	2	-0.18206	0.90577	0.90578	0.996842	20696	0	-0.18206
Npepps	6	0.024525	0.504955	1071	2	-0.41526	0.98428	0.98439	1	22120	0	-0.41526
Myh1	6	0.024525	0.504955	1072	3	-0.79988	0.20069	0.39724	0.945946	8499	2	-0.79988
Rgs5	6	0.024525	0.504955	1073	3	-0.58415	0.93647	0.93675	1	21215	1	-0.58415
Vps54	6	0.024544	0.504955	1074	4	-1.3721	0.97765	0.97774	1	22004	0	-1.3721
Gtl3	6	0.02456	0.504955	1075	5	-1.3627	0.88936	0.90101	0.996378	20481	1	-1.3627
Slc25a28	6	0.024604	0.505412	1076	5	-1.5275	0.89888	0.90704	0.996867	20607	1	-1.5275
Vmn2r105	6	0.024678	0.506469	1077	5	-1.4541	0.75418	0.84365	0.979956	19348	1	-1.4541
Ifnz	4	0.021236	0.468674	1078	3	-1.7591	0.5679	0.66423	0.950349	16882	1	-1.7591
mmu-mir-1946b	4	0.021358	0.469461	1079	1	0.26366	0.56956	0.66496	0.950515	16917	1	0.26366
Zik1	6	0.024916	0.509499	1080	4	-1.3498	0.65623	0.78527	0.968969	18210	1	-1.3498
Hist1h2ak	5	0.022866	0.489987	1081	2	0.31333	0.52186	0.67021	0.951218	16211	2	0.31333
Eif1ad	6	0.024995	0.510664	1082	3	-0.29508	0.13118	0.3066	0.945946	6156	1	-0.29508
Psmb5	6	0.025159	0.512414	1083	3	-1.0091	0.94927	0.94941	1	21443	0	-1.0091
Coa5	6	0.025186	0.512414	1084	4	-1.5385	0.96807	0.96807	1	21798	0	-1.5385
Fam60a	6	0.025194	0.512414	1085	5	-1.064	0.027335	0.09506	0.945946	1670	1	-1.064
Tfb1m	6	0.025274	0.512856	1086	4	-0.89021	0.15622	0.34444	0.945946	7051	2	-0.89021
Gulp1	6	0.025278	0.512856	1087	4	-1.6842	0.74155	0.83982	0.978629	19286	1	-1.6842
Mettl9	6	0.025294	0.512856	1088	4	-1.3411	0.97195	0.97199	1	21888	0	-1.3411
Unc50	6	0.025344	0.513176	1089	4	-1.2661	0.9396	0.93982	1	21271	0	-1.2661
Cwc22	6	0.02539	0.513637	1090	3	-1.6446	0.55446	0.71545	0.958187	16693	1	-1.6446
Ddx41	6	0.02544	0.513877	1091	4	-1.2051	0.88355	0.8976	0.996054	20403	1	-1.2051
Armc7	6	0.025447	0.513877	1092	5	-1.2646	0.91863	0.92126	0.998913	20901	1	-1.2646
Haus7	6	0.025482	0.514125	1093	4	-1.3031	0.95976	0.95975	1	21636	0	-1.3031
Ufl1	6	0.025535	0.514575	1094	4	-1.6919	0.97657	0.97665	1	21983	0	-1.6919
Gm14288	2	0.012244	0.334126	1095	2	-3.297	0.99362	0.99362	1	22297	0	-3.297
Gm3317	1	0.0063452	0.224487	1096	1	-4.294	0.99362	0.99362	1	22296	0	-4.294
Gm10324	5	0.023526	0.49956	1097	4	-1.9051	0.95891	0.95901	1	21620	0	-1.9051
1810026J23Rik	6	0.025729	0.517145	1098	5	-1.3972	0.98218	0.9823	1	22083	0	-1.3972
Nadk2	6	0.025745	0.517145	1099	2	-0.29561	0.50925	0.68614	0.954391	16018	2	-0.29561
Ppp1r2	6	0.025745	0.517145	1100	3	-0.47374	0.21124	0.40949	0.945946	8833	3	-0.47374
Gm3558	2	0.012299	0.33461	1101	2	-2.5385	0.9936	0.99359	1	22295	0	-2.5385
Gpr89	6	0.025848	0.518737	1102	4	-1.5272	0.39319	0.61231	0.945994	14102	2	-1.5272
Sos1	6	0.025942	0.519701	1103	5	-1.3092	0.90871	0.91377	0.998246	20744	1	-1.3092
Rprd2	6	0.025986	0.520125	1104	3	-1.3691	0.99274	0.99274	1	22265	0	-1.3691
Nup88	5	0.023782	0.500453	1105	4	-1.1485	0.99485	0.99486	1	22328	0	-1.1485
Eif5a	6	0.026044	0.520692	1106	3	-1.2137	0.83744	0.87423	0.989208	19963	1	-1.2137
Psmd11	6	0.02606	0.520692	1107	5	-1.5525	0.99492	0.99495	1	22332	0	-1.5525
mmu-mir-101c	3	0.017713	0.416421	1108	3	-1.4033	0.9935	0.99363	1	22290	0	-1.4033
Gm14436	3	0.01772	0.416421	1109	3	-1.3353	0.99349	0.99362	1	22289	0	-1.3353
Hsp90ab1	6	0.026221	0.523097	1110	5	-1.058	0.91359	0.91736	0.9987	20813	1	-1.058
Gps2	6	0.02624	0.523097	1111	3	-0.60072	0.89846	0.90676	0.996842	20600	1	-0.60072
Mcm9	6	0.026256	0.523097	1112	5	-1.2438	0.95395	0.95405	1	21534	0	-1.2438
Scfd1	6	0.026272	0.523097	1113	3	-0.51001	0.91464	0.91816	0.9987	20833	1	-0.51001
Gm10377	3	0.017846	0.418529	1114	3	-2.5242	0.98495	0.98513	1	22128	0	-2.5242
Gps1	6	0.026506	0.526436	1115	4	-1.2296	0.96909	0.96912	1	21821	0	-1.2296
6820408C15Rik	6	0.026539	0.526436	1116	3	-0.93867	0.10115	0.25056	0.945946	4895	3	-0.93867
Ifna7	6	0.026554	0.526436	1117	4	-0.8595	0.34355	0.55868	0.945946	12765	2	-0.8595
Fgf3	6	0.026556	0.526436	1118	5	-0.85	0.55208	0.71388	0.957835	16662	1	-0.85
Mrpl3	6	0.026592	0.526676	1119	4	-0.95918	0.82186	0.86765	0.987489	19831	1	-0.95918
Tmem70	6	0.026709	0.528486	1120	4	-1.6607	0.051865	0.15112	0.945946	2782	2	-1.6607
Mrpl27	6	0.02673	0.528486	1121	4	-0.99735	0.95506	0.95514	1	21550	0	-0.99735
4930596D02Rik	6	0.026813	0.529664	1122	4	-0.84454	0.47089	0.66217	0.950301	15409	2	-0.84454
Tsen54	6	0.026896	0.529935	1123	4	-1.4974	0.98126	0.98137	1	22066	0	-1.4974
Hsd3b1	6	0.027058	0.532655	1124	4	-1.6993	0.9539	0.95401	1	21532	0	-1.6993
Ube2j2	6	0.027222	0.53358	1125	3	-0.82266	0.22096	0.4207	0.945946	9153	2	-0.82266
Zfp74	6	0.027222	0.53358	1126	4	-1.1089	0.58412	0.73509	0.962415	17119	2	-1.1089
Socs3	6	0.027222	0.53358	1127	3	-0.55715	0.66536	0.79195	0.969841	18342	1	-0.55715
Nudc	6	0.027222	0.53358	1128	3	-0.53992	0.87312	0.89169	0.994967	20287	1	-0.53992
Snrpe	6	0.027273	0.533949	1129	4	-1.5357	0.99385	0.99387	1	22303	0	-1.5357
Gtf2h1	6	0.027288	0.533949	1130	4	-1.3352	0.93875	0.93901	1	21256	1	-1.3352
Vprbp	6	0.027315	0.534001	1131	5	-1.4274	0.94996	0.95008	1	21458	0	-1.4274
Haus3	5	0.024836	0.508783	1132	4	-1.6681	0.9934	0.99339	1	22283	0	-1.6681
Dram1	5	0.024861	0.508833	1133	2	-0.5798	0.58696	0.72497	0.960123	17159	1	-0.5798
Nup85	6	0.027424	0.53476	1134	3	-0.58179	0.84	0.87536	0.989351	19990	1	-0.58179
Pop4	6	0.027424	0.53476	1135	4	-1.2408	0.99364	0.99367	1	22298	0	-1.2408
Pfdn5	6	0.027553	0.535914	1136	5	-0.85521	0.99211	0.99211	1	22253	0	-0.85521
Cd19	6	0.027554	0.535914	1137	4	-1.3782	0.92604	0.92735	0.999624	21036	1	-1.3782
Rfc3	5	0.025038	0.511086	1138	3	-1.8833	0.49093	0.64474	0.949199	15732	2	-1.8833
Zfp704	6	0.027642	0.537169	1139	3	-0.9529	0.47814	0.66668	0.950713	15520	2	-0.9529
Cpsf3	6	0.027874	0.540285	1140	4	-1.6297	0.9682	0.9682	1	21801	0	-1.6297
Vps28	5	0.025306	0.512856	1141	4	-1.1705	0.96383	0.96396	1	21726	0	-1.1705
Heatr6	6	0.027926	0.54083	1142	5	-1.0338	0.99821	0.99821	1	22450	0	-1.0338
Vmn1r227	6	0.028119	0.544094	1143	4	-1.3272	0.97334	0.97339	1	21913	0	-1.3272
Cdk8	6	0.028181	0.544837	1144	5	-1.7156	0.96064	0.96065	1	21657	0	-1.7156
Med31	6	0.02829	0.546473	1145	3	-0.97676	0.99727	0.99731	1	22405	0	-0.97676
Usp36	6	0.028349	0.546519	1146	5	-1.1224	0.10636	0.26051	0.945946	5092	1	-1.1224
1700006E09Rik	6	0.028365	0.546519	1147	3	-0.51339	0.055471	0.15885	0.945946	2940	3	-0.51339
Sun5	6	0.028568	0.549505	1148	4	-1.2709	0.088072	0.22504	0.945946	4356	2	-1.2709
Defa-rs1	5	0.025871	0.518751	1149	2	-0.55371	0.35227	0.53497	0.945946	13002	1	-0.55371
Vwa9	6	0.028716	0.550869	1150	4	-1.3697	0.99348	0.99349	1	22287	0	-1.3697
Farsb	6	0.028735	0.550869	1151	5	-1.574	0.83475	0.87308	0.988801	19938	1	-1.574
Nploc4	6	0.028736	0.550869	1152	4	-1.3016	0.83974	0.87524	0.989351	19984	1	-1.3016
Dppa5a	6	0.028798	0.551583	1153	3	-1.1083	0.60183	0.74718	0.963896	17382	1	-1.1083
Vmn2r93	6	0.028827	0.55163	1154	2	-0.18564	0.46675	0.65965	0.950195	15344	1	-0.18564
Cdk7	6	0.028849	0.55163	1155	4	-1.4223	0.98086	0.98097	1	22064	0	-1.4223
Pnpt1	6	0.02898	0.553201	1156	3	-1.0429	0.91364	0.9174	0.9987	20814	1	-1.0429
Fdx1l	6	0.029066	0.553919	1157	5	-1.0175	0.89679	0.9057	0.996842	20575	1	-1.0175
Nek2	6	0.029191	0.555823	1158	4	-1.2455	0.32861	0.54242	0.945946	12364	2	-1.2455
mmu-mir-21a	4	0.025134	0.512414	1159	2	-1.2642	0.10523	0.22515	0.945946	5049	2	-1.2642
Terf1	6	0.029248	0.556445	1160	4	-1.4098	0.9917	0.9917	1	22247	0	-1.4098
Defa4	2	0.014132	0.362725	1161	2	-3.5428	0.99262	0.99263	1	22263	0	-3.5428
Med18	6	0.029406	0.558983	1162	3	-0.54871	0.50619	0.6842	0.953844	15967	2	-0.54871
Kti12	6	0.029494	0.559721	1163	5	-1.3702	0.99348	0.99349	1	22288	0	-1.3702
Pfdn2	6	0.029557	0.560453	1164	3	-0.99445	0.69735	0.8155	0.973261	18814	1	-0.99445
Eif3g	6	0.029631	0.560914	1165	3	-1.1555	0.9634	0.96342	1	21714	0	-1.1555
Usp16	6	0.029681	0.561388	1166	5	-1.3208	0.98591	0.98599	1	22152	0	-1.3208
Gm13251	2	0.014378	0.365964	1167	2	-3.0477	0.99248	0.99249	1	22259	0	-3.0477
Ears2	6	0.029982	0.564943	1168	4	-1.3106	0.84925	0.87961	0.99115	20066	1	-1.3106
Haus6	6	0.030023	0.564943	1169	4	-1.5867	0.73381	0.83754	0.978048	19237	1	-1.5867
Zfp143	6	0.030025	0.564943	1170	2	-0.31057	0.23325	0.43487	0.945946	9543	2	-0.31057
Slc26a7	6	0.030043	0.564943	1171	2	0.16522	0.32442	0.53778	0.945946	12242	3	0.16522
Eif1	6	0.030076	0.565091	1172	4	-1.7217	0.38858	0.60739	0.945994	13980	1	-1.7217
Nupl2	6	0.030152	0.56572	1173	5	-1.1138	0.95279	0.95292	1	21507	0	-1.1138
Polr1e	6	0.030159	0.56572	1174	4	-1.2706	0.77308	0.84979	0.982526	19460	1	-1.2706
Yae1d1	6	0.030274	0.565803	1175	2	-0.36574	0.549	0.71186	0.957507	16622	2	-0.36574
Eppk1	6	0.030274	0.565803	1176	1	0.17956	0.30113	0.51176	0.945946	11564	1	0.17956
Asb3	6	0.030306	0.565803	1177	5	-1.3389	0.99221	0.99222	1	22254	0	-1.3389
Snrnp27	6	0.030309	0.565803	1178	3	-1.2363	0.62601	0.76395	0.966535	17738	1	-1.2363
Wwp1	6	0.030408	0.565803	1179	5	-1.0837	0.99097	0.99098	1	22231	0	-1.0837
Kars	6	0.030409	0.565803	1180	4	-1.4768	0.9646	0.96462	1	21739	0	-1.4768
Cldn20	6	0.030488	0.565803	1181	3	-0.4777	0.84055	0.8756	0.989379	19996	1	-0.4777
2410131K14Rik	6	0.030488	0.565803	1182	3	-0.22377	0.38357	0.60196	0.945946	13853	3	-0.22377
Ssb	6	0.030488	0.565803	1183	4	-0.79455	0.96759	0.96761	1	21789	0	-0.79455
Otud5	6	0.030488	0.565803	1184	4	-1.1208	0.84878	0.8794	0.991009	20065	1	-1.1208
Cops2	6	0.030527	0.565897	1185	5	-0.73872	0.64136	0.77474	0.967224	17992	1	-0.73872
Mat2a	6	0.030543	0.565897	1186	4	-1.4301	0.34052	0.55537	0.945946	12693	1	-1.4301
Atg14	5	0.02747	0.535194	1187	3	-1.6169	0.12953	0.27625	0.945946	6081	2	-1.6169
Ireb2	5	0.02773	0.538413	1188	2	0.15867	0.82978	0.84526	0.980548	19902	1	0.15867
Aldh4a1	6	0.0309	0.571139	1189	4	-1.3638	0.93315	0.93361	1	21163	1	-1.3638
Gm14440	3	0.021182	0.468674	1190	2	-2.793	0.94793	0.94812	1	21416	0	-2.793
Haus4	6	0.031064	0.573673	1191	4	-1.3499	0.97725	0.97733	1	21992	0	-1.3499
Gm1123	6	0.031164	0.575051	1192	5	-0.78475	0.30598	0.51722	0.945946	11712	1	-0.78475
Ndufb9	6	0.031316	0.576504	1193	4	-1.3169	0.90967	0.91443	0.998439	20754	1	-1.3169
Cdc45	6	0.031319	0.576504	1194	4	-1.4187	0.98945	0.98948	1	22197	0	-1.4187
Mbtps2	6	0.031473	0.577466	1195	5	-1.2989	0.8715	0.8908	0.994798	20265	1	-1.2989
Rbbp5	6	0.031529	0.578023	1196	4	-1.4041	0.85554	0.88264	0.992093	20122	1	-1.4041
Gm10100	6	0.031562	0.578164	1197	3	-0.41034	0.46437	0.65817	0.950195	15301	2	-0.41034
Hmgn2	6	0.031709	0.57995	1198	3	-0.019321	0.12365	0.29274	0.945946	5837	3	-0.019321
Clns1a	6	0.031727	0.57995	1199	5	-1.2301	0.9777	0.97778	1	22005	0	-1.2301
Grpel1	6	0.031736	0.57995	1200	4	-1.3006	0.96298	0.963	1	21701	0	-1.3006
Rit2	5	0.028551	0.549505	1201	3	-1.5902	0.0021372	0.0092965	0.945946	191	2	-1.5902
Wars	6	0.031956	0.583398	1202	3	-1.0482	0.88103	0.89613	0.995555	20380	1	-1.0482
Mfap1b	3	0.02192	0.4766	1203	2	-2.4025	0.90088	0.90104	0.996378	20628	0	-2.4025
Cdc5l	6	0.031977	0.583398	1204	4	-1.5067	0.99376	0.99377	1	22300	0	-1.5067
Pgs1	6	0.032018	0.583685	1205	3	-1.3414	0.21881	0.41824	0.945946	9082	1	-1.3414
Kri1	5	0.028717	0.550869	1206	4	-1.32	0.98614	0.98615	1	22156	0	-1.32
Sap30bp	6	0.032185	0.586254	1207	4	-1.7164	0.98512	0.98524	1	22132	0	-1.7164
D10Wsu102e	6	0.032221	0.586451	1208	3	-1.0331	0.91567	0.91896	0.9987	20852	1	-1.0331
Wtap	6	0.032306	0.587042	1209	3	-0.57795	0.66225	0.78966	0.969358	18299	2	-0.57795
Cps1	6	0.032306	0.587042	1210	2	-0.37332	0.88654	0.89933	0.9962	20435	1	-0.37332
Rpp40	6	0.032467	0.589014	1211	4	-1.5726	0.28462	0.49322	0.945946	11081	2	-1.5726
Cbr4	6	0.032492	0.589014	1212	4	-1.285	0.73955	0.83921	0.978531	19273	1	-1.285
Obox2	6	0.032576	0.59007	1213	4	-1.222	0.5177	0.69159	0.955523	16141	1	-1.222
Zbtb11	6	0.03268	0.590894	1214	3	-0.91979	0.70888	0.82421	0.975619	18962	2	-0.91979
Frzb	6	0.032706	0.590894	1215	3	-1.2462	0.44829	0.64834	0.949564	15048	2	-1.2462
Hira	6	0.032706	0.590894	1216	5	-1.1896	0.96979	0.96981	1	21836	0	-1.1896
Cdc16	6	0.032728	0.590894	1217	5	-0.89175	0.99623	0.99627	1	22364	0	-0.89175
Rnaseh2a	6	0.03277	0.590894	1218	4	-1.5338	0.56677	0.72353	0.960048	16868	1	-1.5338
Ska3	6	0.032799	0.590894	1219	3	-0.64278	0.7217	0.83387	0.976682	19179	1	-0.64278
Rnpc3	6	0.032804	0.590894	1220	4	-1.3558	0.97204	0.97208	1	21892	0	-1.3558
Npff	6	0.032915	0.592155	1221	2	0.035486	0.1252	0.2956	0.945946	5902	2	0.035486
Ifna1	5	0.029463	0.559601	1222	4	-1.2717	0.87761	0.87983	0.99115	20337	1	-1.2717
Cpsf4	6	0.032927	0.592155	1223	4	-1.2972	0.083508	0.21597	0.945946	4165	2	-1.2972
Atp5l	5	0.029589	0.560589	1224	2	-0.27999	0.78446	0.81908	0.974171	19544	1	-0.27999
Gm1979	3	0.022744	0.489987	1225	3	-1.1081	0.99157	0.99169	1	22243	0	-1.1081
Nutf2	6	0.033132	0.595106	1226	3	-0.84829	0.69688	0.81514	0.973261	18800	1	-0.84829
Hmgb3	6	0.033193	0.595528	1227	4	-1.4124	0.6962	0.81464	0.973261	18789	1	-1.4124
Ccng1	6	0.03332	0.596941	1228	4	-1.4276	0.19882	0.395	0.945946	8445	1	-1.4276
Akr1c19	6	0.033324	0.596941	1229	3	-0.28151	0.083298	0.21558	0.945946	4158	2	-0.28151
mmu-mir-466m	2	0.016191	0.396088	1230	2	-3.2997	0.99149	0.99148	1	22240	0	-3.2997
Ddx20	6	0.033401	0.597223	1231	5	-0.86882	0.97653	0.97661	1	21980	0	-0.86882
Bmi1	6	0.033419	0.597223	1232	2	0.20612	0.25571	0.46058	0.945946	10209	3	0.20612
mmu-mir-1970	4	0.028934	0.552791	1233	3	-2.2627	0.07002	0.16146	0.945946	3567	1	-2.2627
Fam96a	6	0.03358	0.599298	1234	4	-1.4775	0.20608	0.40353	0.945946	8680	2	-1.4775
Rbbp6	6	0.033588	0.599298	1235	3	-1.3023	0.97215	0.9722	1	21894	0	-1.3023
Wnt3a	6	0.033745	0.60084	1236	2	-0.065885	0.62241	0.76145	0.966145	17690	2	-0.065885
Adat3	6	0.033941	0.602495	1237	3	-0.1667	0.15498	0.34293	0.945946	7011	3	-0.1667
Nars	6	0.03398	0.602495	1238	5	-1.3794	0.89716	0.90593	0.996842	20581	1	-1.3794
Coq5	6	0.033992	0.602495	1239	5	-1.0675	0.93212	0.93266	1	21143	1	-1.0675
Tti1	6	0.03407	0.602675	1240	5	-0.96051	0.97197	0.97202	1	21889	0	-0.96051
Iscu	6	0.034162	0.603833	1241	3	-1.2429	0.97633	0.97642	1	21973	0	-1.2429
Bysl	6	0.034221	0.604411	1242	5	-1.4744	0.94463	0.94477	1	21355	0	-1.4744
Pi4kb	6	0.03438	0.605895	1243	4	-1.3194	0.95927	0.95926	1	21624	0	-1.3194
Gosr2	6	0.034385	0.605895	1244	4	-1.0401	0.99853	0.99854	1	22462	0	-1.0401
Casc1	6	0.034385	0.605895	1245	2	0.27677	0.063465	0.17558	0.945946	3299	2	0.27677
Defa-rs7	2	0.016736	0.405935	1246	2	-1.714	0.9912	0.99119	1	22235	0	-1.714
Zfp534	3	0.023679	0.500453	1247	2	-2.2341	0.2541	0.38095	0.945946	10171	1	-2.2341
Sfrs18	6	0.03445	0.606161	1248	4	-1.5123	0.96391	0.96392	1	21730	0	-1.5123
BC068281	6	0.034454	0.606161	1249	3	-0.50569	0.38889	0.60773	0.945994	13988	2	-0.50569
Gm5934	3	0.023757	0.500453	1250	2	-1.1172	0.75608	0.75606	0.965387	19359	0	-1.1172
Ophn1	6	0.034756	0.609592	1251	4	-1.7725	0.91953	0.92195	0.998913	20920	1	-1.7725
Psenen	6	0.034756	0.609592	1252	4	-1.4204	0.85017	0.88005	0.99115	20076	1	-1.4204
Gm13212	4	0.030269	0.565803	1253	3	-1.3709	0.025768	0.075196	0.945946	1596	1	-1.3709
Dcp1a	6	0.035014	0.613162	1254	4	-1.2429	0.43426	0.63982	0.949199	14818	1	-1.2429
Tas2r131	6	0.035072	0.613232	1255	4	-1.1959	0.51412	0.68928	0.955298	16080	2	-1.1959
mmu-mir-7211	4	0.030404	0.565803	1256	2	-1.649	0.45459	0.60245	0.945946	15142	2	-1.649
Mrps25	6	0.035128	0.613271	1257	3	-0.5598	0.50408	0.68285	0.953543	15933	2	-0.5598
Yap1	6	0.035128	0.613271	1258	3	-0.1671	0.35668	0.57295	0.945946	13126	3	-0.1671
D2Wsu81e	6	0.035221	0.614421	1259	4	-1.164	0.95367	0.95379	1	21527	0	-1.164
Chmp2a	5	0.031348	0.576566	1260	4	-0.92067	0.33256	0.5198	0.945946	12484	1	-0.92067
Usp18	5	0.031388	0.576829	1261	4	-1.1949	0.60218	0.73815	0.962787	17391	1	-1.1949
Ncor2	6	0.035524	0.61923	1262	5	-0.99355	0.96751	0.96753	1	21786	0	-0.99355
Vmn1r3	4	0.030882	0.571139	1263	3	-0.89244	0.46955	0.61748	0.945994	15383	1	-0.89244
Vmn1r37	4	0.030902	0.571139	1264	2	-1.3048	0.79707	0.80198	0.970801	19636	1	-1.3048
Cpd	6	0.035688	0.621251	1265	5	-0.92458	0.46713	0.65986	0.950221	15349	1	-0.92458
Atp5c1	6	0.035695	0.621251	1266	4	-0.60296	0.96143	0.96149	1	21675	0	-0.60296
Vmn1r113	6	0.035737	0.621391	1267	2	0.68239	0.12294	0.29143	0.945946	5810	3	0.68239
Naa30	6	0.035758	0.621391	1268	4	-1.3099	0.49327	0.67605	0.951827	15765	1	-1.3099
Olfr1241	6	0.035838	0.62188	1269	2	-0.052829	0.028933	0.10001	0.945946	1748	2	-0.052829
Cdc123	6	0.035841	0.62188	1270	4	-1.1892	0.73951	0.83919	0.978531	19272	1	-1.1892
Hist1h3e	4	0.031205	0.575332	1271	3	-1.6107	0.88522	0.88513	0.992807	20421	0	-1.6107
Hist2h2bb	6	0.036063	0.625081	1272	5	-1.3839	0.9986	0.99862	1	22466	0	-1.3839
Cops3	6	0.036108	0.625081	1273	3	-1.1196	0.78282	0.85308	0.98319	19523	1	-1.1196
Ddx58	6	0.036278	0.62755	1274	4	-1.3972	0.64725	0.7789	0.968405	18067	1	-1.3972
Tspear	6	0.036395	0.628717	1275	5	-0.8325	0.17738	0.36974	0.945946	7739	1	-0.8325
Ndufa3	6	0.036455	0.628717	1276	5	-1.0179	0.69237	0.81182	0.97275	18731	1	-1.0179
Tep1	6	0.036484	0.628717	1277	3	-0.768	0.47757	0.66633	0.950564	15514	2	-0.768
Calm1	6	0.036484	0.628717	1278	3	-0.46716	0.3856	0.60417	0.945994	13907	1	-0.46716
Eif3j1	5	0.032421	0.588657	1279	4	-1.5278	0.6187	0.75031	0.964239	17637	1	-1.5278
Cmtr1	6	0.036583	0.629946	1280	5	-0.94032	0.98215	0.98227	1	22082	0	-0.94032
Casc5	6	0.03665	0.63061	1281	4	-1.3548	0.81038	0.86307	0.986215	19746	1	-1.3548
Dpm1	6	0.03675	0.631851	1282	4	-1.4526	0.98965	0.98969	1	22201	0	-1.4526
Rad51ap1	6	0.03699	0.634675	1283	2	0.28598	0.27701	0.48469	0.945946	10868	3	0.28598
Cnot11	6	0.037048	0.634675	1284	4	-1.2654	0.97707	0.97716	1	21991	0	-1.2654
Plin4	6	0.037062	0.634675	1285	5	-0.95184	0.85751	0.8836	0.992341	20142	1	-0.95184
Dnajc8	6	0.03711	0.634675	1286	4	-1.2886	0.91613	0.91931	0.998761	20862	1	-1.2886
Nsf	6	0.037161	0.635077	1287	4	-1.3569	0.97633	0.97642	1	21974	0	-1.3569
Mrps18b	6	0.037264	0.635118	1288	5	-1.0009	0.40481	0.62218	0.945994	14376	1	-1.0009
Ranbp2	6	0.037276	0.635118	1289	5	-1.1625	0.57028	0.7259	0.960466	16925	1	-1.1625
Olfr596	6	0.037311	0.635243	1290	4	-1.6846	0.019634	0.071134	0.945946	1298	2	-1.6846
Usp32	5	0.033143	0.595106	1291	3	-1.5127	0.4529	0.61408	0.945994	15118	2	-1.5127
Mrps22	6	0.037386	0.635975	1292	3	-1.4421	0.72059	0.83304	0.976236	19168	1	-1.4421
Nsl1	6	0.03741	0.635975	1293	4	-1.3117	0.90466	0.91093	0.998164	20682	1	-1.3117
Xpo1	6	0.037597	0.638673	1294	5	-0.8942	0.98062	0.98072	1	22061	0	-0.8942
Pom121	6	0.037805	0.641235	1295	3	-0.62012	0.34563	0.56094	0.945946	12827	3	-0.62012
Abcf1	6	0.037863	0.641755	1296	3	-1.2912	0.75925	0.84523	0.980548	19376	1	-1.2912
mmu-mir-466b-3	2	0.018542	0.431282	1297	2	-3.8629	0.91577	0.91582	0.998607	20855	0	-3.8629
Taf1b	6	0.037984	0.643317	1298	3	-1.224	0.82863	0.87045	0.98787	19892	1	-1.224
Wdr7	5	0.033754	0.60084	1299	4	-0.91507	0.76223	0.8078	0.971861	19399	1	-0.91507
Olfr352	6	0.038189	0.646302	1300	2	-0.46495	0.55488	0.71571	0.958187	16702	2	-0.46495
Csprs	6	0.038225	0.646425	1301	4	-1.256	0.44724	0.64772	0.949392	15029	1	-1.256
Sgol1	6	0.038314	0.64735	1302	5	-1.2555	0.99251	0.99251	1	22260	0	-1.2555
Ncbp2	6	0.038336	0.64735	1303	4	-1.2717	0.97929	0.97938	1	22042	0	-1.2717
Prim1	5	0.034059	0.602675	1304	4	-1.529	0.99309	0.99307	1	22275	0	-1.529
Med19	6	0.038702	0.651805	1305	3	-0.44493	0.24128	0.444	0.945946	9779	3	-0.44493
Klra21	3	0.02686	0.529935	1306	3	-1.4521	0.98998	0.99013	1	22214	0	-1.4521
Chd4	6	0.038755	0.651805	1307	5	-0.88569	0.99436	0.99438	1	22314	0	-0.88569
Nol10	6	0.038755	0.651805	1308	5	-1.4987	0.89291	0.90322	0.996666	20521	1	-1.4987
Eif2s2	6	0.03882	0.651805	1309	4	-1.4793	0.99896	0.99896	1	22481	0	-1.4793
Gstm1	6	0.03883	0.651805	1310	4	-1.2456	0.21714	0.41635	0.945946	9025	2	-1.2456
Med11	6	0.038917	0.651992	1311	3	-1.1288	0.98583	0.98591	1	22149	0	-1.1288
Arhgef5	6	0.038927	0.651992	1312	4	-0.962	0.93324	0.93369	1	21164	1	-0.962
Gosr1	6	0.038967	0.652168	1313	3	-1.2113	0.90732	0.9128	0.998231	20722	1	-1.2113
Trnt1	6	0.03903	0.652418	1314	3	-0.90687	0.35481	0.57092	0.945946	13079	2	-0.90687
Zfp781	5	0.034611	0.607991	1315	3	-0.87122	0.92347	0.92358	0.999269	20985	0	-0.87122
Sec63	6	0.039285	0.655071	1316	1	0.035746	0.69134	0.81106	0.97275	18717	1	0.035746
Arglu1	6	0.039571	0.658877	1317	4	-1.2948	0.95609	0.95613	1	21570	0	-1.2948
Hnrnpl	6	0.039677	0.660159	1318	3	-0.33756	0.91415	0.91779	0.9987	20823	1	-0.33756
Ankrd1	5	0.035059	0.613232	1319	4	-1.0924	0.60035	0.73653	0.962622	17349	1	-1.0924
Sun3	6	0.03979	0.661555	1320	3	-0.36399	0.079439	0.20783	0.945946	3986	3	-0.36399
Hnrnpa3	6	0.039956	0.663334	1321	3	-0.89451	0.11423	0.27527	0.945946	5434	2	-0.89451
Get4	6	0.040132	0.665288	1322	5	-0.92082	0.99671	0.99676	1	22382	0	-0.92082
Ankrd55	6	0.040264	0.666555	1323	3	-1.1158	0.50891	0.68592	0.954299	16011	2	-1.1158
Eif2b3	6	0.040278	0.666555	1324	5	-1.0878	0.98508	0.98519	1	22131	0	-1.0878
Adat2	6	0.040297	0.666555	1325	4	-1.3157	0.98037	0.98047	1	22054	0	-1.3157
Sacm1l	6	0.040364	0.667187	1326	5	-0.95303	0.89554	0.90491	0.996766	20559	1	-0.95303
Akap14	6	0.040458	0.668245	1327	3	-0.33409	0.30662	0.51794	0.945946	11732	3	-0.33409
Nsmce2	6	0.040595	0.670021	1328	4	-0.7939	0.95218	0.95232	1	21498	0	-0.7939
2700060E02Rik	6	0.040698	0.671233	1329	3	-0.71078	0.55313	0.71457	0.957835	16679	2	-0.71078
Cwf19l1	6	0.040787	0.67222	1330	3	-0.45154	0.40681	0.62338	0.945994	14417	2	-0.45154
Prkrir	6	0.040974	0.674096	1331	3	-0.52463	0.88815	0.90027	0.9962	20459	1	-0.52463
Olfr533	6	0.041006	0.674096	1332	4	-1.1008	0.77435	0.8502	0.982602	19469	1	-1.1008
Tcstv3	6	0.04102	0.674096	1333	4	-1.3543	0.66356	0.79062	0.969654	18317	2	-1.3543
Cyfip1	6	0.041192	0.67595	1334	4	-1.2312	0.43471	0.6401	0.949199	14823	2	-1.2312
Wdfy2	6	0.041475	0.679296	1335	3	-1.0986	0.72166	0.83383	0.976682	19178	1	-1.0986
Mis18bp1	6	0.041503	0.679296	1336	4	-1.2917	0.83036	0.87117	0.98787	19908	1	-1.2917
Kif20a	6	0.041531	0.679296	1337	4	-1.1824	0.69879	0.8166	0.973699	18829	1	-1.1824
Rars	6	0.041539	0.679296	1338	4	-1.4083	0.93756	0.93783	1	21229	1	-1.4083
Nmd3	6	0.041546	0.679296	1339	5	-1.1094	0.92044	0.9227	0.998913	20940	1	-1.1094
Gm21671	3	0.029036	0.55381	1340	2	-2.2606	0.88463	0.88481	0.992807	20414	0	-2.2606
Josd1	6	0.041652	0.680256	1341	4	-1.19	0.98045	0.98056	1	22059	0	-1.19
Chmp7	6	0.041665	0.680256	1342	5	-0.91601	0.82029	0.86703	0.987341	19818	1	-0.91601
Lrrc36	6	0.041843	0.681551	1343	3	-1.0745	0.57317	0.72783	0.960932	16963	2	-1.0745
Gpr4	6	0.041843	0.681551	1344	3	-0.60909	0.85846	0.88408	0.992628	20147	1	-0.60909
Emc4	6	0.041843	0.681551	1345	3	-0.83137	0.61726	0.75788	0.965833	17610	1	-0.83137
Slc25a5	6	0.041955	0.682533	1346	4	-1.3333	0.96323	0.96325	1	21707	0	-1.3333
Sprr2a1	5	0.037074	0.634675	1347	4	-0.87314	0.97657	0.97663	1	21982	0	-0.87314
Nckap1	5	0.037087	0.634675	1348	3	-1.5912	0.41171	0.58162	0.945946	14472	1	-1.5912
Vps72	6	0.042161	0.684496	1349	5	-1.2458	0.98198	0.9821	1	22080	0	-1.2458
Wrb	6	0.042192	0.684496	1350	5	-1.1755	0.024363	0.086049	0.945946	1523	1	-1.1755
Gprin2	5	0.037256	0.635118	1351	3	-0.85172	0.50765	0.65855	0.950195	15992	1	-0.85172
Rbm27	6	0.042405	0.68739	1352	4	-1.0141	0.78737	0.85463	0.983772	19565	1	-1.0141
Smc3	6	0.042545	0.689176	1353	3	-0.83193	0.87064	0.89035	0.994798	20255	1	-0.83193
Stk11	6	0.042747	0.691949	1354	5	-1.0362	0.86437	0.88709	0.993553	20203	1	-1.0362
Tango6	6	0.042832	0.692079	1355	4	-0.6401	0.98503	0.98515	1	22130	0	-0.6401
Trrap	6	0.042832	0.692079	1356	4	-1.4582	0.78815	0.85493	0.983895	19569	1	-1.4582
Fads6	6	0.042863	0.692079	1357	3	-1.0834	0.92606	0.92736	0.999624	21037	1	-1.0834
Ywhah	6	0.042877	0.692079	1358	4	-1.3822	0.69173	0.81134	0.97275	18722	1	-1.3822
Srsf7	6	0.043175	0.694914	1359	4	-1.2215	0.96686	0.96688	1	21779	0	-1.2215
Ddx5	6	0.043175	0.694914	1360	4	-0.95717	0.88846	0.90047	0.9962	20468	1	-0.95717
Sympk	6	0.043217	0.695095	1361	5	-0.97137	0.80194	0.85984	0.985371	19679	1	-0.97137
Eef1e1	6	0.043322	0.695679	1362	4	-1.0405	0.88572	0.89884	0.9962	20426	1	-1.0405
Lsm8	6	0.043357	0.695679	1363	4	-1.3161	0.92577	0.92712	0.999624	21032	1	-1.3161
Asprv1	6	0.043389	0.695679	1364	5	-0.95851	0.6569	0.78576	0.969131	18216	1	-0.95851
Atr	6	0.04343	0.695679	1365	5	-0.86547	0.015402	0.057433	0.945946	1054	1	-0.86547
Ppp1r14b	6	0.04344	0.695679	1366	3	-0.76833	0.39942	0.61892	0.945994	14285	2	-0.76833
6430571L13Rik	6	0.043544	0.696396	1367	3	-0.38719	0.56753	0.72404	0.960123	16879	2	-0.38719
Trappc5	6	0.043647	0.697298	1368	4	-1.3595	0.92761	0.92868	0.999705	21060	1	-1.3595
Mmp1b	6	0.043662	0.697298	1369	4	-1.2285	0.68298	0.80494	0.971492	18601	2	-1.2285
Gm14685	5	0.038404	0.64801	1370	3	-1.5234	0.4999	0.65208	0.949621	15869	2	-1.5234
Gtf3c5	6	0.04378	0.698239	1371	5	-1.103	0.92043	0.92269	0.998913	20939	1	-1.103
Naa15	6	0.04381	0.698239	1372	5	-1.0319	0.81161	0.86354	0.986215	19756	1	-1.0319
Pira2	4	0.037226	0.635118	1373	2	-0.5441	0.03229	0.088468	0.945946	1919	2	-0.5441
C920025E04Rik	6	0.043843	0.698239	1374	3	0.097032	0.24654	0.44996	0.945946	9946	3	0.097032
Ndc1	6	0.043844	0.698239	1375	4	-1.4056	0.60194	0.74726	0.963896	17387	1	-1.4056
Brap	6	0.044122	0.700724	1376	4	-1.2618	0.93855	0.9388	1	21254	1	-1.2618
Zfp119a	6	0.044148	0.700724	1377	5	-0.75586	0.88688	0.89953	0.9962	20443	1	-0.75586
Alg12	6	0.044178	0.700724	1378	4	-1.4977	0.39654	0.61584	0.945994	14198	1	-1.4977
Tomm40	6	0.044185	0.700724	1379	4	-1.2883	0.96741	0.96744	1	21785	0	-1.2883
C1ra	5	0.039039	0.652418	1380	3	-1.4208	0.6079	0.74309	0.963896	17483	2	-1.4208
Magea8	6	0.044543	0.705907	1381	5	-0.69397	0.80662	0.86163	0.985851	19716	1	-0.69397
Mrpl43	6	0.044711	0.707096	1382	5	-1.24	0.96873	0.96876	1	21816	0	-1.24
Pdilt	6	0.044877	0.708724	1383	4	-1.189	0.78153	0.85265	0.98319	19513	1	-1.189
Gnai3	6	0.045	0.709456	1384	5	-0.67738	0.90382	0.91032	0.997886	20672	1	-0.67738
Ddx1	6	0.045074	0.709456	1385	4	-1.3445	0.97747	0.97755	1	21998	0	-1.3445
Dot1l	6	0.045161	0.709456	1386	2	0.019797	0.046169	0.13887	0.945946	2540	3	0.019797
Arhgap30	6	0.045161	0.709456	1387	2	0.47932	0.15583	0.34395	0.945946	7037	3	0.47932
Sppl3	6	0.045161	0.709456	1388	3	-0.30617	0.055724	0.15938	0.945946	2950	3	-0.30617
Ivl	6	0.045196	0.709456	1389	4	-1.3108	0.39133	0.61033	0.945994	14058	2	-1.3108
Taf1c	6	0.045205	0.709456	1390	4	-1.2225	0.98181	0.98192	1	22077	0	-1.2225
Nelfa	6	0.045503	0.713142	1391	5	-0.90147	0.95074	0.95087	1	21469	0	-0.90147
C030039L03Rik	5	0.039992	0.66345	1392	2	-0.49887	0.83703	0.84991	0.982526	19959	1	-0.49887
Olfr1462	6	0.045652	0.714981	1393	4	-1.2771	0.41845	0.63035	0.947441	14586	2	-1.2771
Vmn2r104	6	0.045767	0.715995	1394	3	-0.76913	0.64071	0.77426	0.967224	17978	2	-0.76913
Stard7	6	0.04578	0.715995	1395	4	-1.0794	0.99355	0.99357	1	22292	0	-1.0794
Wdr18	6	0.046069	0.71899	1396	4	-1.4091	0.80162	0.85972	0.985371	19673	1	-1.4091
Pdcd11	6	0.046171	0.719287	1397	4	-1.4313	0.26298	0.46885	0.945946	10434	1	-1.4313
Sla	6	0.046181	0.719287	1398	4	-1.3638	0.012495	0.04786	0.945946	866	1	-1.3638
Cdk11b	6	0.046279	0.720323	1399	4	-1.1033	0.95201	0.95217	1	21491	0	-1.1033
Ms4a15	6	0.0464	0.720767	1400	4	-1.3659	0.63387	0.76943	0.967202	17859	1	-1.3659
Ptpn20	6	0.046411	0.720767	1401	4	-1.123	0.87178	0.89096	0.994798	20269	1	-1.123
Taf8	6	0.046482	0.720767	1402	3	-1.0249	0.86531	0.88757	0.993847	20209	1	-1.0249
Ifna2	6	0.046482	0.720767	1403	2	0.34707	0.63728	0.7718	0.967224	17907	2	0.34707
Copa	6	0.04653	0.720767	1404	4	-1.3924	0.97056	0.97059	1	21857	0	-1.3924
Romo1	6	0.046591	0.721221	1405	4	-1.3214	0.41807	0.63012	0.947386	14580	2	-1.3214
Hist1h2bn	4	0.0391	0.652959	1406	2	-0.56275	0.14223	0.28847	0.945946	6603	1	-0.56275
Med28	6	0.046633	0.721388	1407	4	-1.2	0.98349	0.98358	1	22106	0	-1.2
Gpr26	5	0.040979	0.674096	1408	3	-1.544	0.048357	0.13654	0.945946	2628	2	-1.544
Lamtor1	6	0.046757	0.722317	1409	4	-1.166	0.98489	0.985	1	22127	0	-1.166
Wdr46	6	0.046935	0.724069	1410	4	-1.136	0.86261	0.88617	0.993013	20189	1	-1.136
Elp2	6	0.04709	0.72548	1411	3	-1.0176	0.16118	0.35045	0.945946	7214	2	-1.0176
Vmn1r9	6	0.04716	0.726063	1412	3	-0.38871	0.22062	0.4203	0.945946	9143	2	-0.38871
Vmn2r34	4	0.039557	0.658877	1413	3	-1.5718	0.97623	0.97633	1	21972	0	-1.5718
Skiv2l	6	0.047366	0.727476	1414	4	-1.1005	0.7794	0.85194	0.983035	19501	1	-1.1005
Olfr1472	6	0.0474	0.727476	1415	5	-1.3351	0.9455	0.94563	1	21374	0	-1.3351
Gar1	6	0.047504	0.727476	1416	3	-0.82887	0.89192	0.90259	0.996666	20504	1	-0.82887
4930407I10Rik	6	0.047555	0.727476	1417	4	-1.4198	0.65309	0.78306	0.968901	18160	2	-1.4198
Ccnl1	6	0.047556	0.727476	1418	4	-1.1621	0.88204	0.89671	0.995755	20389	1	-1.1621
Ptprr	6	0.047567	0.727476	1419	3	-0.29963	0.062467	0.17351	0.945946	3240	3	-0.29963
Spinkl	6	0.047642	0.727476	1420	3	-1.1087	0.1881	0.38239	0.945946	8101	1	-1.1087
Srpr	6	0.047665	0.727476	1421	5	-0.78151	0.97231	0.97235	1	21896	0	-0.78151
Orc5	6	0.047669	0.727476	1422	3	-0.56017	0.97246	0.97249	1	21902	0	-0.56017
Mns1	6	0.047669	0.727476	1423	2	0.14327	0.7126	0.827	0.975619	19036	2	0.14327
Dld	6	0.047701	0.727476	1424	4	-1.2194	0.91419	0.91782	0.9987	20824	1	-1.2194
mmu-mir-6380	4	0.039914	0.663131	1425	3	-1.6451	0.78685	0.79387	0.97026	19561	1	-1.6451
mmu-mir-3473b	3	0.03363	0.599582	1426	1	0.58831	0.0041528	0.011438	0.945946	320	2	0.58831
Mesdc2	6	0.048073	0.732171	1427	5	-0.95864	0.96288	0.96289	1	21699	0	-0.95864
Aurka	6	0.048147	0.732796	1428	4	-1.04	0.97132	0.97137	1	21875	0	-1.04
Ppa1	6	0.04818	0.732809	1429	4	-1.316	0.89932	0.90732	0.997007	20611	1	-1.316
Gm2042	3	0.033833	0.601782	1430	3	-2.0972	0.96853	0.96865	1	21809	0	-2.0972
Ppia	6	0.048253	0.732942	1431	3	-1.1311	0.65335	0.78325	0.968901	18162	1	-1.1311
Wbscr16	6	0.048362	0.733126	1432	5	-1.1719	0.99616	0.99619	1	22360	0	-1.1719
Trib3	6	0.048387	0.733126	1433	3	-0.34488	0.084881	0.21874	0.945946	4223	3	-0.34488
Iqch	6	0.048394	0.733126	1434	5	-0.71223	0.72468	0.83487	0.976935	19196	1	-0.71223
Skint1	6	0.048635	0.734807	1435	4	-1.4961	0.9102	0.91481	0.998542	20761	1	-1.4961
Eif3i	6	0.048825	0.736973	1436	5	-1.3266	0.97776	0.97783	1	22009	0	-1.3266
Mybl1	6	0.048852	0.736973	1437	4	-1.3048	0.63514	0.77031	0.967224	17876	2	-1.3048
Prpf18	6	0.048915	0.736973	1438	4	-1.3254	0.99158	0.99158	1	22245	0	-1.3254
Nrxn2	6	0.048942	0.736973	1439	3	-0.63194	0.036598	0.11785	0.945946	2112	2	-0.63194
Rdm1	6	0.048942	0.736973	1440	3	-0.62479	0.17146	0.36276	0.945946	7561	2	-0.62479
9530002B09Rik	6	0.049043	0.737348	1441	5	-1.0156	0.43865	0.64248	0.949199	14874	1	-1.0156
Sec61g	6	0.049063	0.737348	1442	4	-1.334	0.19096	0.38577	0.945946	8184	2	-1.334
Sdcbp2	6	0.049129	0.737722	1443	5	-1.0084	0.16081	0.35002	0.945946	7205	1	-1.0084
Gm906	5	0.042974	0.693143	1444	2	0.39	0.29969	0.49449	0.945946	11534	2	0.39
Inpp5k	6	0.049213	0.737899	1445	3	-0.86291	0.93015	0.9309	1	21100	1	-0.86291
Tbl3	6	0.049263	0.737908	1446	3	-0.57833	0.32152	0.53457	0.945946	12158	3	-0.57833
Vmn1r152	2	0.024793	0.508366	1447	1	-2.6508	0.51618	0.52093	0.945946	16119	1	-2.6508
Stag3	5	0.043392	0.695679	1448	3	-1.712	0.49572	0.64868	0.949578	15792	2	-1.712
Thoc6	6	0.049663	0.743159	1449	4	-1.3138	0.98423	0.98434	1	22118	0	-1.3138
Smg5	6	0.049679	0.743159	1450	4	-1.5572	0.93115	0.93176	1	21121	1	-1.5572
Pyroxd1	6	0.049745	0.74334	1451	4	-1.3096	0.81464	0.86476	0.986641	19774	1	-1.3096
Mitd1	6	0.049784	0.74334	1452	5	-0.94458	0.98242	0.98254	1	22088	0	-0.94458
Mbd3	6	0.049809	0.74334	1453	5	-0.77145	0.25215	0.45644	0.945946	10106	1	-0.77145
Faah	6	0.049823	0.74334	1454	3	-0.1142	0.10222	0.25258	0.945946	4929	3	-0.1142
Pkmyt1	6	0.050004	0.745069	1455	5	-0.76138	0.49199	0.67521	0.951735	15748	1	-0.76138
Ddx4	6	0.050196	0.746943	1456	4	-1.1546	0.81031	0.86304	0.986215	19745	1	-1.1546
Ipcef1	6	0.050267	0.747505	1457	4	-1.2081	0.46449	0.65824	0.950195	15303	2	-1.2081
Nbn	6	0.050414	0.748382	1458	4	-1.0935	0.88486	0.89833	0.9962	20417	1	-1.0935
Eif4e2	6	0.050475	0.748382	1459	2	-0.049058	0.5223	0.69453	0.955657	16215	1	-0.049058
Mup6	6	0.050491	0.748382	1460	3	-0.76667	0.9372	0.93745	1	21223	1	-0.76667
Pdgfb	6	0.050536	0.748559	1461	3	-0.57052	0.49701	0.67839	0.952871	15813	2	-0.57052
Gpn2	5	0.044164	0.700724	1462	3	-1.0039	0.95954	0.95964	1	21629	0	-1.0039
Fam209	6	0.050678	0.750019	1463	4	-1.1733	0.58639	0.73666	0.962622	17151	2	-1.1733
Ggps1	6	0.050722	0.750019	1464	4	-0.83191	0.076311	0.20164	0.945946	3845	1	-0.83191
Ceacam11	6	0.050733	0.750019	1465	3	-1.0424	0.37668	0.59456	0.945946	13665	2	-1.0424
Itgb5	6	0.050831	0.750976	1466	5	-0.94308	0.43907	0.64273	0.949199	14877	1	-0.94308
Vdac2	6	0.051029	0.752917	1467	4	-1.1326	0.18073	0.37371	0.945946	7870	1	-1.1326
Racgap1	6	0.051147	0.753205	1468	4	-1.3545	0.93433	0.93471	1	21175	1	-1.3545
Zfp960	5	0.044712	0.707096	1469	4	-0.78834	0.37088	0.54944	0.945946	13506	1	-0.78834
Dyrk1b	5	0.044753	0.707258	1470	2	0.60912	0.20975	0.39027	0.945946	8787	3	0.60912
Dnajc5	6	0.051272	0.754511	1471	5	-0.76431	0.76039	0.84562	0.980665	19383	1	-0.76431
Ctps	6	0.05132	0.754511	1472	4	-1.0837	0.97077	0.97081	1	21860	0	-1.0837
Hist1h2ae	4	0.042196	0.684496	1473	2	-0.48621	0.44897	0.59684	0.945946	15055	2	-0.48621
Tbce	6	0.051356	0.754511	1474	4	-1.2288	0.62273	0.76167	0.966145	17694	1	-1.2288
Cntd1	5	0.044978	0.709456	1475	2	0.002319	0.90354	0.90354	0.996666	20664	0	0.002319
Mrps10	6	0.051503	0.755495	1476	4	-1.0803	0.42209	0.63256	0.947675	14648	1	-1.0803
Gm11559	5	0.045032	0.709456	1477	3	-1.7619	0.10358	0.23752	0.945946	4987	2	-1.7619
Dhrsx	6	0.051548	0.755659	1478	4	-1.5354	0.48775	0.67264	0.951312	15672	2	-1.5354
Olfr1513	6	0.051603	0.755983	1479	2	0.42087	0.13666	0.31663	0.945946	6394	3	0.42087
Pms2	6	0.051913	0.760034	1480	3	-0.77676	0.84639	0.87826	0.990365	20047	1	-0.77676
Arap3	6	0.052097	0.761741	1481	3	-0.49562	0.15771	0.34628	0.945946	7102	3	-0.49562
Hist1h2bq	1	0.013852	0.3586	1482	1	-3.6088	0.98606	0.98606	1	22154	0	-3.6088
Mrps11	6	0.05224	0.763343	1483	4	-1.2678	0.99805	0.99805	1	22442	0	-1.2678
Telo2	6	0.052319	0.763635	1484	4	-1.4084	0.69869	0.81653	0.973699	18826	2	-1.4084
Dzip1	6	0.052328	0.763635	1485	3	-0.91769	0.92461	0.92613	0.99938	21010	1	-0.91769
Lztfl1	6	0.052367	0.763716	1486	3	-1.1168	0.31165	0.52356	0.945946	11878	1	-1.1168
Sass6	6	0.052401	0.763716	1487	5	-0.56301	0.63649	0.77123	0.967224	17892	1	-0.56301
Gm4027	3	0.03692	0.634297	1488	2	-1.9263	0.95925	0.95945	1	21623	0	-1.9263
Banf1	6	0.052453	0.763988	1489	5	-0.69504	0.99286	0.99287	1	22269	0	-0.69504
Coq3	6	0.05261	0.765013	1490	5	-0.84366	0.85901	0.88436	0.992628	20153	1	-0.84366
BC017643	6	0.052618	0.765013	1491	4	-1.3507	0.45132	0.65021	0.949592	15089	2	-1.3507
Psmc1	5	0.045988	0.718757	1492	4	-1.0394	0.97236	0.9724	1	21899	0	-1.0394
Serpinb9f	5	0.046029	0.718896	1493	3	-1.3285	0.38344	0.55929	0.945946	13847	2	-1.3285
Grin2a	6	0.052799	0.767054	1494	4	-1.1829	0.78827	0.85497	0.983895	19571	1	-1.1829
Mogat1	6	0.053083	0.767897	1495	3	-0.38999	0.58438	0.73528	0.962415	17123	2	-0.38999
Klb	6	0.053083	0.767897	1496	2	0.6064	0.076893	0.20281	0.945946	3875	3	0.6064
Snrnp40	6	0.053083	0.767897	1497	3	-0.41795	0.60866	0.75186	0.96465	17491	2	-0.41795
Tiam2	6	0.053118	0.767897	1498	1	0.42645	0.18992	0.38454	0.945946	8158	2	0.42645
Mrpl4	6	0.053118	0.767897	1499	4	-0.91576	0.91144	0.91575	0.998607	20776	1	-0.91576
Gm12657	6	0.053151	0.767897	1500	3	-0.63467	0.39178	0.61082	0.945994	14069	3	-0.63467
Tsfm	6	0.053162	0.767897	1501	5	-1.087	0.98897	0.98902	1	22185	0	-1.087
Vmn1r31	6	0.053328	0.769816	1502	4	-1.2207	0.80689	0.86174	0.985899	19718	1	-1.2207
Xlr3a	2	0.026896	0.529935	1503	2	-1.9231	0.98567	0.98578	1	22147	0	-1.9231
Arpc1b	6	0.053466	0.771003	1504	4	-1.1656	0.93061	0.93128	1	21111	1	-1.1656
Ttf1	6	0.053479	0.771003	1505	3	-1.0767	0.96151	0.96156	1	21676	0	-1.0767
Dcun1d1	5	0.04673	0.722317	1506	3	-1.5029	0.71919	0.78816	0.969199	19143	1	-1.5029
Vbp1	6	0.053637	0.772733	1507	4	-1.2203	0.95174	0.95189	1	21484	0	-1.2203
Gm9268	6	0.053674	0.772733	1508	4	-1.1444	0.89283	0.90316	0.996666	20517	1	-1.1444
Prim2	6	0.053886	0.774905	1509	4	-1.4834	0.9974	0.99742	1	22409	0	-1.4834
Dnajb13	6	0.05393	0.775041	1510	3	0.044619	0.11911	0.28435	0.945946	5648	3	0.044619
Nfatc3	6	0.054082	0.775424	1511	3	-1.0142	0.35349	0.56952	0.945946	13038	2	-1.0142
Pde3b	5	0.047367	0.727476	1512	2	0.37852	0.092124	0.22007	0.945946	4532	2	0.37852
Gm10488	2	0.027371	0.534649	1513	2	-2.2564	0.98541	0.98552	1	22139	0	-2.2564
Nphp3	6	0.054152	0.775424	1514	3	-0.82544	0.39422	0.61343	0.945994	14135	2	-0.82544
Frk	6	0.054158	0.775424	1515	3	-0.065463	0.28652	0.49543	0.945946	11153	3	-0.065463
Lsm2	6	0.054161	0.775424	1516	2	-0.43429	0.25374	0.45831	0.945946	10162	2	-0.43429
Pnldc1	6	0.054319	0.776038	1517	4	-1.1424	0.74705	0.84148	0.979072	19316	1	-1.1424
Mapk7	6	0.054352	0.776038	1518	3	-0.64975	0.57025	0.72588	0.960466	16923	2	-0.64975
Kif1c	6	0.054354	0.776038	1519	3	0.057666	0.2491	0.45287	0.945946	10022	3	0.057666
Gfer	6	0.054354	0.776038	1520	4	-1.2898	0.94836	0.9485	1	21422	0	-1.2898
Olfr165	6	0.054375	0.776038	1521	4	-1.0413	0.93815	0.9384	1	21246	1	-1.0413
Unc45a	6	0.054475	0.776969	1522	3	-0.65952	0.424	0.63369	0.948258	14671	2	-0.65952
Dhx35	5	0.048019	0.731845	1523	4	-1.0931	0.81498	0.83629	0.977393	19780	1	-1.0931
Spopl	6	0.054676	0.778039	1524	4	-1.2418	0.18234	0.3756	0.945946	7917	2	-1.2418
Pttg1	6	0.054691	0.778039	1525	3	-0.45591	0.25917	0.46452	0.945946	10318	3	-0.45591
Hist2h3c1	2	0.027789	0.539096	1526	2	-2.2522	0.98518	0.9853	1	22134	0	-2.2522
Uba3	6	0.054721	0.778039	1527	3	-1.1353	0.8378	0.87439	0.989317	19964	1	-1.1353
Ehbp1	6	0.054765	0.778039	1528	1	0.12161	0.33175	0.54589	0.945946	12466	2	0.12161
Erc2	6	0.0548	0.778039	1529	3	-1.0816	0.6757	0.79956	0.970484	18498	2	-1.0816
Mapkapk5	6	0.054844	0.778039	1530	4	-1.1164	0.32472	0.53811	0.945946	12257	1	-1.1164
Cadm4	5	0.048223	0.732942	1531	4	-1.4726	0.26627	0.46603	0.945946	10535	1	-1.4726
2310009B15Rik	6	0.054859	0.778039	1532	2	0.24301	0.34887	0.5645	0.945946	12905	3	0.24301
Hist1h2bk	3	0.039195	0.654052	1533	2	-1.132	0.79218	0.79208	0.969841	19601	0	-1.132
Vmn2r61	5	0.048615	0.734807	1534	1	0.34869	0.18759	0.35958	0.945946	8083	2	0.34869
Olfr1161	6	0.055211	0.782274	1535	3	-0.34196	0.32767	0.5414	0.945946	12335	3	-0.34196
Tppp3	6	0.055226	0.782274	1536	3	-0.27566	0.45737	0.65385	0.950036	15184	2	-0.27566
Dnaja3	6	0.055397	0.784202	1537	4	-0.77707	0.34097	0.55586	0.945946	12708	2	-0.77707
Bet1	6	0.055439	0.784306	1538	4	-1.2512	0.97621	0.97629	1	21971	0	-1.2512
Gm608	6	0.05551	0.784829	1539	3	-0.95421	0.51842	0.69205	0.955523	16156	2	-0.95421
Rbck1	6	0.055585	0.784854	1540	4	-1.1882	0.22351	0.42366	0.945946	9224	2	-1.1882
Mbtd1	6	0.055651	0.784854	1541	4	-1.0414	0.94969	0.94981	1	21453	0	-1.0414
Dph3	5	0.049153	0.737722	1542	3	-1.315	0.9814	0.98153	1	22071	0	-1.315
Fmo9	6	0.05572	0.78535	1543	3	-0.48098	0.71007	0.8251	0.975619	18988	1	-0.48098
Mageb1	5	0.04923	0.737899	1544	3	-1.5278	0.6377	0.7568	0.965507	17917	1	-1.5278
Vmn2r96	6	0.055755	0.785355	1545	3	-0.75168	0.93925	0.93949	1	21265	0	-0.75168
Wdr25	6	0.056063	0.789194	1546	4	-1.0874	0.933	0.93346	1	21161	1	-1.0874
Vmn2r37	1	0.015282	0.381264	1547	1	-3.2405	0.98463	0.98463	1	22123	0	-3.2405
Sult1e1	6	0.056167	0.789682	1548	2	0.42166	0.28608	0.49489	0.945946	11141	3	0.42166
Esp36	6	0.056298	0.791027	1549	4	-1.3652	0.93881	0.93907	1	21257	1	-1.3652
Mphosph6	6	0.05641	0.791405	1550	4	-1.1645	0.91849	0.92114	0.998913	20898	1	-1.1645
Klrb1f	6	0.056533	0.791405	1551	3	-0.54532	0.33405	0.54837	0.945946	12521	1	-0.54532
Wipf2	6	0.056533	0.791405	1552	2	-0.12016	0.063237	0.1751	0.945946	3286	1	-0.12016
Vmac	6	0.056533	0.791405	1553	3	-0.95772	0.44427	0.64589	0.949266	14980	2	-0.95772
Naprt1	6	0.056533	0.791405	1554	2	0.27014	0.36111	0.57771	0.945946	13252	2	0.27014
Skint3	5	0.050165	0.746943	1555	4	-0.98549	0.94841	0.94855	1	21424	0	-0.98549
Tmem181a	6	0.056589	0.791405	1556	3	-1.0444	0.72222	0.83421	0.976881	19181	1	-1.0444
Rabggta	6	0.056604	0.791405	1557	4	-1.1493	0.94277	0.94296	1	21326	0	-1.1493
Ighmbp2	6	0.056742	0.792363	1558	2	-0.022058	0.15265	0.34011	0.945946	6938	3	-0.022058
Atp6v1f	6	0.056742	0.792363	1559	4	-1.0077	0.92008	0.9224	0.998913	20930	1	-1.0077
Polr2c	5	0.050458	0.748382	1560	4	-1.4775	0.41477	0.58398	0.945946	14527	1	-1.4775
Kin	5	0.050482	0.748382	1561	3	-1.4788	0.87182	0.87511	0.989351	20270	1	-1.4788
Shoc2	6	0.056855	0.792746	1562	4	-1.4862	0.42793	0.63607	0.949101	14722	1	-1.4862
Lce6a	6	0.056855	0.792746	1563	4	-1.4821	0.324	0.5373	0.945946	12228	2	-1.4821
Eif3j2	6	0.056874	0.792746	1564	3	-0.46393	0.20186	0.39865	0.945946	8536	3	-0.46393
Olfr1371	4	0.046975	0.724196	1565	3	-1.3418	0.97131	0.97129	1	21874	0	-1.3418
Ptpn18	6	0.057287	0.797868	1566	2	0.012412	0.59615	0.74335	0.963896	17286	1	0.012412
Nedd1	6	0.057364	0.798102	1567	3	-0.44001	0.48008	0.66786	0.950942	15547	1	-0.44001
Slc51a	6	0.057545	0.799641	1568	4	-1.5846	0.39609	0.61539	0.945994	14187	2	-1.5846
Olfr541	6	0.057545	0.799641	1569	4	-1.4433	0.096921	0.24243	0.945946	4731	2	-1.4433
E2f5	5	0.05137	0.754511	1570	3	-1.686	0.47786	0.63411	0.948349	15517	2	-1.686
Gm11554	3	0.041864	0.681551	1571	2	-1.8831	0.69106	0.69558	0.955657	18714	1	-1.8831
Slc25a15	6	0.057907	0.80299	1572	4	-1.14	0.52632	0.69711	0.955657	16278	2	-1.14
Gnb1l	6	0.057916	0.80299	1573	4	-1.2591	0.69647	0.81484	0.973261	18794	1	-1.2591
Scgb1b24	6	0.057951	0.80299	1574	3	-0.41251	0.93008	0.93083	1	21099	1	-0.41251
Neu2	6	0.057963	0.80299	1575	4	-0.99472	0.48423	0.67042	0.951218	15614	2	-0.99472
Cbx3	6	0.058077	0.803717	1576	4	-0.76719	0.80347	0.86043	0.985548	19691	1	-0.76719
Olfr1211	6	0.058087	0.803717	1577	4	-1.0933	0.14425	0.33005	0.945946	6688	2	-1.0933
Nmi	6	0.058153	0.804145	1578	3	-1.1644	0.64753	0.77912	0.968405	18069	2	-1.1644
Pars2	6	0.058195	0.804234	1579	3	-1.1083	0.86997	0.88999	0.994611	20248	1	-1.1083
Polr2d	6	0.058306	0.805269	1580	4	-0.75802	0.98788	0.9879	1	22175	0	-0.75802
Scrt2	6	0.058372	0.805695	1581	2	0.13804	0.12083	0.28752	0.945946	5725	3	0.13804
Rrn3	6	0.058439	0.806127	1582	4	-0.72975	0.94412	0.94427	1	21346	0	-0.72975
Rbmy	2	0.030427	0.565803	1583	2	-3.9287	0.98369	0.9838	1	22109	0	-3.9287
Pde9a	5	0.052625	0.765013	1584	3	-1.26	0.34227	0.5273	0.945946	12743	2	-1.26
Fpr2	6	0.058783	0.810386	1585	3	-0.87647	0.92388	0.92551	0.99938	20998	1	-0.87647
Capsl	6	0.058862	0.810982	1586	3	-0.90728	0.48145	0.66869	0.951153	15562	2	-0.90728
Snf8	6	0.058953	0.811458	1587	4	-1.367	0.30598	0.51722	0.945946	11711	2	-1.367
Wdr1	5	0.052871	0.767615	1588	4	-1.1173	0.96683	0.96697	1	21777	0	-1.1173
Olfr1302	6	0.059057	0.812172	1589	4	-1.0204	0.52908	0.69897	0.955657	16328	2	-1.0204
Vmn2r111	6	0.059092	0.812172	1590	4	-1.2456	0.24687	0.45035	0.945946	9956	1	-1.2456
Marveld3	5	0.053145	0.767897	1591	3	-1.3401	0.48301	0.63834	0.949151	15589	1	-1.3401
Gm20831	3	0.043468	0.695679	1592	2	-1.9932	0.44626	0.5246	0.945946	15014	1	-1.9932
Ankrd11	6	0.059431	0.81421	1593	4	-1.4012	0.12451	0.29431	0.945946	5868	2	-1.4012
Vmn1r80	6	0.059431	0.81421	1594	4	-1.3069	0.02688	0.093681	0.945946	1648	2	-1.3069
Fam63a	6	0.059455	0.81421	1595	2	-0.32161	0.27028	0.47715	0.945946	10682	2	-0.32161
Sirt6	6	0.059455	0.81421	1596	2	0.21557	0.19426	0.38963	0.945946	8285	3	0.21557
Timm44	6	0.059619	0.814711	1597	3	-0.18356	0.9188	0.9214	0.998913	20905	1	-0.18356
Ptbp1	6	0.059626	0.814711	1598	4	-0.96713	0.96646	0.96648	1	21765	0	-0.96713
Mia	6	0.059636	0.814711	1599	3	-0.77813	0.15125	0.33843	0.945946	6893	2	-0.77813
Zbed4	6	0.059677	0.814787	1600	4	-1.016	0.97346	0.97352	1	21915	0	-1.016
Tomm22	5	0.053701	0.772733	1601	3	-1.4244	0.92118	0.9213	0.998913	20955	0	-1.4244
Defb38	6	0.059803	0.815975	1602	3	-0.20727	0.2754	0.48287	0.945946	10823	3	-0.20727
Rangap1	6	0.059852	0.815975	1603	4	-1.3313	0.97738	0.97745	1	21995	0	-1.3313
Mpc2	6	0.059965	0.815975	1604	4	-1.1485	0.98942	0.98945	1	22196	0	-1.1485
Olfr870	5	0.054017	0.775424	1605	4	-1.1488	0.97865	0.97873	1	22026	0	-1.1488
Naalad2	6	0.059983	0.815975	1606	4	-1.1979	0.53434	0.70231	0.956464	16404	2	-1.1979
Garem	6	0.06006	0.815975	1607	4	-1.233	0.17617	0.36832	0.945946	7703	2	-1.233
Puf60	5	0.054115	0.775424	1608	4	-0.93899	0.99536	0.99537	1	22339	0	-0.93899
Iars2	6	0.060159	0.816452	1609	3	-0.73717	0.30861	0.52015	0.945946	11786	1	-0.73717
mmu-mir-466l	3	0.044184	0.700724	1610	2	-1.933	0.68133	0.68729	0.954933	18584	1	-1.933
Atm	6	0.060532	0.818797	1611	4	-1.011	0.90109	0.90848	0.997447	20630	1	-1.011
Gm3285	6	0.060546	0.818797	1612	3	-0.6485	0.22159	0.42141	0.945946	9178	1	-0.6485
mmu-mir-7080	4	0.049908	0.744127	1613	1	1.0606	0.048172	0.11991	0.945946	2620	3	1.0606
H2afv	6	0.060617	0.818797	1614	4	-1.056	0.46121	0.65618	0.950036	15250	1	-1.056
Atp5d	6	0.060641	0.818797	1615	3	-0.70899	0.85013	0.88004	0.99115	20074	1	-0.70899
Gpr82	6	0.060657	0.818797	1616	3	-0.026133	0.011896	0.045837	0.945946	818	3	-0.026133
Olfr904	6	0.060657	0.818797	1617	3	-1.0305	0.31862	0.5313	0.945946	12084	2	-1.0305
Pdia5	6	0.060657	0.818797	1618	3	-0.47448	0.12365	0.29273	0.945946	5836	2	-0.47448
Cenpn	6	0.060657	0.818797	1619	3	-0.80475	0.97124	0.97127	1	21872	0	-0.80475
Mup12	1	0.01713	0.412827	1620	1	-3.2329	0.98284	0.98288	1	22096	0	-3.2329
Hist1h3f	3	0.044701	0.707096	1621	3	-0.7843	0.98282	0.98296	1	22095	0	-0.7843
Elp4	6	0.060822	0.820542	1622	3	-0.76317	0.80778	0.86207	0.985998	19730	1	-0.76317
Cenpi	6	0.060899	0.821085	1623	4	-1.21	0.99721	0.99726	1	22403	0	-1.21
Ppp1r1c	6	0.061008	0.821321	1624	4	-1.0237	0.60084	0.74651	0.963896	17361	1	-1.0237
Crcp	6	0.061061	0.821321	1625	4	-1.0672	0.85156	0.88071	0.991339	20090	1	-1.0672
Tfam	6	0.061106	0.821433	1626	4	-1.2944	0.60274	0.74781	0.963896	17405	2	-1.2944
Gemin2	6	0.061182	0.82197	1627	4	-1.3741	0.95206	0.9522	1	21494	0	-1.3741
2025-09-07	6	0.061252	0.822271	1628	4	-1.3558	0.99653	0.99657	1	22375	0	-1.3558
Mzt1	6	0.061277	0.822271	1629	3	-0.48235	0.30527	0.51643	0.945946	11689	1	-0.48235
Ccnc	6	0.061414	0.823377	1630	3	-0.94345	0.96852	0.96854	1	21808	0	-0.94345
Dohh	6	0.061432	0.823377	1631	4	-1.2158	0.98344	0.98354	1	22104	0	-1.2158
St6gal1	5	0.055634	0.784854	1632	3	-1.3384	0.48395	0.63909	0.949151	15609	2	-1.3384
Mnat1	6	0.061858	0.828592	1633	3	-0.8985	0.6761	0.79983	0.970484	18505	1	-0.8985
Kpna6	6	0.061927	0.828713	1634	4	-1.1135	0.93226	0.93279	1	21146	1	-1.1135
Kcnq3	6	0.06194	0.828713	1635	4	-0.98572	0.70769	0.82332	0.975619	18946	1	-0.98572
Metap2	6	0.062004	0.829037	1636	3	-1.027	0.98982	0.98986	1	22209	0	-1.027
Dcp2	6	0.062037	0.829037	1637	2	-0.10141	0.48667	0.67195	0.951312	15655	1	-0.10141
Hspa9	5	0.056569	0.791405	1638	3	-1.4842	0.95415	0.95424	1	21536	0	-1.4842
Sephs1	6	0.062469	0.833825	1639	4	-1.0702	0.58705	0.73709	0.962622	17161	1	-1.0702
Tacc3	6	0.062549	0.834406	1640	4	-1.0834	0.097609	0.24371	0.945946	4759	2	-1.0834
Olfr1532-ps1	6	0.062694	0.835479	1641	4	-1.0119	0.52377	0.69549	0.955657	16237	1	-1.0119
Vps51	6	0.062703	0.835479	1642	3	-1.0229	0.90813	0.91336	0.998231	20733	1	-1.0229
Gm4141	2	0.033371	0.597223	1643	1	-1.6237	0.16119	0.24426	0.945946	7215	1	-1.6237
Ppie	6	0.062749	0.835593	1644	4	-1.2207	0.67886	0.80188	0.970801	18543	1	-1.2207
Med6	6	0.062803	0.835699	1645	4	-1.1736	0.90366	0.91021	0.997886	20667	1	-1.1736
Lix1l	6	0.06283	0.835699	1646	2	-0.36313	0.050649	0.14849	0.945946	2729	2	-0.36313
Rpa3	6	0.06295	0.836309	1647	4	-1.1042	0.819	0.86649	0.987089	19810	1	-1.1042
Gimap7	6	0.063069	0.836418	1648	3	-0.5193	0.031239	0.10582	0.945946	1855	2	-0.5193
Znrd1	6	0.063113	0.836418	1649	4	-1.105	0.95566	0.95571	1	21562	0	-1.105
Nup133	6	0.063129	0.836418	1650	4	-0.84921	0.95153	0.95167	1	21480	0	-0.84921
Prpsap1	6	0.063153	0.836418	1651	3	-0.3168	0.65189	0.78222	0.96857	18147	2	-0.3168
Gm7073	6	0.063248	0.836418	1652	4	-1.0751	0.14958	0.33644	0.945946	6852	2	-1.0751
Dctd	6	0.063271	0.836418	1653	4	-0.9674	0.67051	0.79579	0.970484	18412	2	-0.9674
Sox14	6	0.063294	0.836418	1654	2	-0.29341	0.025685	0.090086	0.945946	1591	2	-0.29341
Prkar1a	6	0.063294	0.836418	1655	4	-0.88905	0.98654	0.98658	1	22160	0	-0.88905
Med14	6	0.063362	0.836418	1656	4	-1.3148	0.005268	0.02272	0.945946	403	2	-1.3148
Ptpn14	6	0.063364	0.836418	1657	4	-1.0279	0.76419	0.84681	0.981126	19411	1	-1.0279
Carf	6	0.063425	0.836743	1658	3	-0.99414	0.19978	0.39615	0.945946	8473	2	-0.99414
Olfr206	6	0.063501	0.836918	1659	4	-0.86294	0.82348	0.86832	0.987608	19846	1	-0.86294
Rrp7a	6	0.063535	0.836918	1660	3	-1.197	0.97289	0.97293	1	21908	0	-1.197
Gm21293	3	0.047522	0.727476	1661	2	-0.7116	0.67157	0.67904	0.952871	18430	1	-0.7116
Neil3	6	0.063741	0.838955	1662	3	-0.3739	0.032788	0.1093	0.945946	1943	3	-0.3739
Apitd1	6	0.06391	0.840198	1663	3	-0.40713	0.90143	0.90872	0.997447	20639	1	-0.40713
1700017N19Rik	6	0.06391	0.840198	1664	2	0.36392	0.12632	0.29768	0.945946	5939	3	0.36392
Yeats4	6	0.064003	0.840641	1665	4	-1.0849	0.68206	0.80427	0.971492	18588	1	-1.0849
Pstk	6	0.064017	0.840641	1666	4	-1.189	0.84677	0.87843	0.990457	20050	1	-1.189
Sap18	6	0.064096	0.84118	1667	4	-1.2803	0.51958	0.6928	0.955657	16175	1	-1.2803
Dusp8	6	0.064248	0.842211	1668	3	-0.9419	0.62519	0.76337	0.966483	17728	2	-0.9419
Olfr136	6	0.064331	0.842433	1669	3	-0.9954	0.9915	0.99151	1	22241	0	-0.9954
Gm4559	6	0.064377	0.842433	1670	3	-0.46289	0.28918	0.49838	0.945946	11226	3	-0.46289
Gsdmc2	6	0.064479	0.843082	1671	4	-0.98205	0.27036	0.47724	0.945946	10684	1	-0.98205
Tmem208	6	0.064501	0.843082	1672	4	-1.2497	0.95065	0.95079	1	21467	0	-1.2497
Lin52	6	0.064721	0.844965	1673	3	-0.67077	0.61798	0.75836	0.965894	17624	2	-0.67077
Zfc3h1	6	0.064722	0.844965	1674	4	-1.2196	0.996	0.99604	1	22356	0	-1.2196
Bcl2a1a	3	0.048498	0.734197	1675	2	-0.91672	0.82105	0.82097	0.974742	19827	0	-0.91672
Ddx39	6	0.064757	0.844965	1676	4	-1.0898	0.92266	0.92451	0.99938	20973	1	-1.0898
Pold1	5	0.059257	0.813953	1677	3	-0.61133	0.98971	0.98977	1	22205	0	-0.61133
Skp1a	6	0.06518	0.849996	1678	4	-1.0999	0.31542	0.52775	0.945946	11995	2	-1.0999
Itgb3	6	0.065237	0.850259	1679	4	-1.0178	0.60693	0.75066	0.964265	17466	2	-1.0178
Eml5	6	0.065338	0.850448	1680	3	0.016943	0.067475	0.18375	0.945946	3473	3	0.016943
Tdrd6	6	0.065338	0.850448	1681	1	0.18201	0.21775	0.41705	0.945946	9047	2	0.18201
Cul4b	6	0.065364	0.850448	1682	4	-1.05	0.97925	0.97934	1	22040	0	-1.05
Sult1d1	6	0.065644	0.852026	1683	2	-0.34286	0.15839	0.34711	0.945946	7121	2	-0.34286
Set	6	0.065644	0.852026	1684	3	-0.44433	0.41219	0.6266	0.946795	14480	1	-0.44433
Arhgap12	6	0.065644	0.852026	1685	3	-0.41209	0.0057	0.02431	0.945946	433	2	-0.41209
Acer2	6	0.065644	0.852026	1686	2	0.8054	0.044931	0.13619	0.945946	2474	4	0.8054
Nr2c2ap	6	0.065673	0.852026	1687	3	-0.86998	0.94803	0.94816	1	21417	0	-0.86998
Mrpl12	6	0.065806	0.852545	1688	4	-1.1389	0.9855	0.9856	1	22144	0	-1.1389
Dpm2	6	0.065806	0.852545	1689	4	-1.1373	0.91298	0.91691	0.9987	20806	1	-1.1373
Rasl11b	6	0.065864	0.852545	1690	2	0.5389	0.17905	0.37171	0.945946	7802	3	0.5389
Serpinh1	6	0.065864	0.852545	1691	2	-0.23748	0.43181	0.63835	0.949151	14785	2	-0.23748
Vps13d	5	0.060502	0.818797	1692	3	-0.73764	0.93163	0.93186	1	21131	0	-0.73764
Exoc3l4	6	0.066013	0.853987	1693	4	-1.4118	0.97431	0.97438	1	21933	0	-1.4118
Pim3	6	0.06609	0.854289	1694	4	-1.0583	0.13315	0.31017	0.945946	6232	2	-1.0583
Mypn	6	0.066172	0.854289	1695	3	-0.33839	0.10304	0.25412	0.945946	4959	3	-0.33839
Copz1	6	0.066181	0.854289	1696	4	-1.0089	0.85741	0.88355	0.992341	20138	1	-1.0089
Dcps	6	0.066187	0.854289	1697	4	-0.95957	0.92054	0.92278	0.998913	20943	1	-0.95957
mmu-mir-8103	4	0.054712	0.778039	1698	3	-1.5304	0.79327	0.79893	0.970484	19606	1	-1.5304
Chchd2	4	0.054741	0.778039	1699	2	-1.226	0.69453	0.73096	0.961415	18764	1	-1.226
Tut1	6	0.066369	0.85567	1700	4	-1.2014	0.91326	0.91712	0.9987	20809	1	-1.2014
Tle3	5	0.061056	0.821321	1701	2	-0.11476	0.22328	0.40874	0.945946	9216	2	-0.11476
Bin2	5	0.061058	0.821321	1702	4	-1.3513	0.97392	0.97396	1	21926	0	-1.3513
Taf1a	6	0.066584	0.857946	1703	3	-0.26579	0.089821	0.22852	0.945946	4426	3	-0.26579
Ywhaq	6	0.066798	0.860219	1704	3	-0.88381	0.91082	0.91525	0.998607	20770	1	-0.88381
Dnlz	6	0.06703	0.861709	1705	4	-1.0525	0.99558	0.99561	1	22344	0	-1.0525
Vcpip1	6	0.067104	0.861709	1706	4	-0.96761	0.93369	0.9341	1	21169	1	-0.96761
Psd2	6	0.067104	0.861709	1707	3	-0.0059614	0.074689	0.19836	0.945946	3772	3	-0.0059614
Bzw1	6	0.067222	0.862234	1708	3	-0.74482	0.44596	0.64694	0.949392	15010	2	-0.74482
Dhx38	6	0.067259	0.862234	1709	3	-0.88514	0.45454	0.65215	0.949621	15140	1	-0.88514
Tubg1	6	0.067323	0.862569	1710	4	-0.71223	0.70031	0.81775	0.973834	18857	1	-0.71223
Cdc26	6	0.067427	0.863413	1711	4	-1.2399	0.98408	0.98418	1	22115	0	-1.2399
Srfbp1	5	0.062093	0.829295	1712	1	0.18095	0.51152	0.66172	0.950221	16047	2	0.18095
Eif3d	6	0.067707	0.866518	1713	3	-0.56982	0.32296	0.53618	0.945946	12196	2	-0.56982
Mn1	6	0.067754	0.866621	1714	3	-0.49903	0.27853	0.48642	0.945946	10907	3	-0.49903
Actr8	6	0.067852	0.867389	1715	4	-1.01	0.92479	0.92629	0.99938	21016	1	-1.01
Mfap1a	3	0.051489	0.755495	1716	3	-1.3137	0.98003	0.98013	1	22052	0	-1.3137
Whsc1	6	0.068062	0.869178	1717	3	-0.3419	0.48063	0.66819	0.950942	15555	2	-0.3419
AA467197	6	0.068103	0.869178	1718	4	-1.2726	0.24371	0.44678	0.945946	9860	2	-1.2726
Bcar1	6	0.068107	0.869178	1719	4	-0.78331	0.62166	0.76093	0.966145	17680	1	-0.78331
Acot1	6	0.068291	0.871039	1720	2	0.29128	0.27502	0.48245	0.945946	10812	3	0.29128
Kif5a	6	0.068487	0.872742	1721	3	-0.87032	0.56394	0.72163	0.959292	16829	2	-0.87032
Kctd9	6	0.068502	0.872742	1722	2	-0.43524	0.87484	0.89265	0.995144	20310	1	-0.43524
Gm5082	6	0.068556	0.872947	1723	2	-0.5548	0.4902	0.67412	0.951313	15722	2	-0.5548
Brca2	6	0.068749	0.872992	1724	2	-0.40795	0.44495	0.64631	0.949351	14996	2	-0.40795
Klra9	6	0.068749	0.872992	1725	2	0.096798	0.19736	0.39327	0.945946	8389	2	0.096798
Mcm5	6	0.068752	0.872992	1726	4	-1.0023	0.80624	0.86149	0.985851	19711	1	-1.0023
Dppa3	6	0.068752	0.872992	1727	3	-0.45214	0.63798	0.77231	0.967224	17923	1	-0.45214
Osgep	5	0.063549	0.836918	1728	3	-0.97741	0.89236	0.89284	0.995155	20512	1	-0.97741
Mrto4	6	0.068921	0.874079	1729	3	-0.90381	0.94231	0.94251	1	21319	0	-0.90381
Zfp236	6	0.069043	0.874079	1730	4	-1.0624	0.0076179	0.031204	0.945946	549	2	-1.0624
Tmem199	6	0.069047	0.874079	1731	3	-0.83242	0.65818	0.78672	0.969199	18231	2	-0.83242
Dgcr2	6	0.069049	0.874079	1732	2	0.073021	0.58149	0.73333	0.962006	17078	2	0.073021
Nus1	6	0.069085	0.874079	1733	4	-1.1677	0.63912	0.77312	0.967224	17946	1	-1.1677
Atp7a	6	0.069108	0.874079	1734	4	-1.0279	0.13452	0.31267	0.945946	6296	2	-1.0279
Tex19.2	6	0.069163	0.874292	1735	3	-0.38244	0.25386	0.45844	0.945946	10164	3	-0.38244
Fbxw2	6	0.069226	0.874594	1736	4	-0.99725	0.31918	0.53194	0.945946	12101	2	-0.99725
Pnkp	5	0.064178	0.841776	1737	3	-0.92863	0.89866	0.89876	0.9962	20603	1	-0.92863
Nlrp4e	6	0.069557	0.878291	1738	3	-0.53526	0.21223	0.41065	0.945946	8868	3	-0.53526
Nop10	5	0.064372	0.842433	1739	3	-1.4382	0.71996	0.78846	0.969213	19156	1	-1.4382
Cdc27	6	0.069666	0.878713	1740	3	-1.0643	0.1148	0.27628	0.945946	5450	1	-1.0643
Mst1	6	0.069668	0.878713	1741	2	0.29213	0.20509	0.40241	0.945946	8642	3	0.29213
Olfr26	6	0.069746	0.87921	1742	3	-0.36379	0.29774	0.50793	0.945946	11469	2	-0.36379
mmu-mir-690	4	0.057693	0.801195	1743	2	-1.06	0.11175	0.2366	0.945946	5333	1	-1.06
Timm50	6	0.069843	0.879459	1744	3	-0.592	0.9239	0.92553	0.99938	20999	1	-0.592
1110004F10Rik	6	0.070091	0.882092	1745	4	-0.99876	0.91807	0.9208	0.9989	20893	1	-0.99876
Hsd17b13	6	0.070149	0.882328	1746	2	0.19221	0.096867	0.24233	0.945946	4728	2	0.19221
Tmem150b	6	0.070251	0.882402	1747	3	-0.29029	0.51945	0.69272	0.955657	16172	2	-0.29029
Olfr345	6	0.070251	0.882402	1748	3	-0.36973	0.34522	0.56051	0.945946	12817	2	-0.36973
Car9	6	0.070272	0.882402	1749	2	0.38829	0.031098	0.10551	0.945946	1848	3	0.38829
mmu-mir-669o	2	0.038823	0.651805	1750	2	-2.122	0.97904	0.97915	1	22032	0	-2.122
Gm14391	2	0.038867	0.651946	1751	2	-1.5777	0.97901	0.97913	1	22031	0	-1.5777
Ints8	6	0.070664	0.885469	1752	4	-1.52	0.70792	0.82351	0.975619	18949	2	-1.52
Ppp1r15b	6	0.070672	0.885469	1753	4	-0.97012	0.19347	0.38869	0.945946	8262	2	-0.97012
Timm9	6	0.070672	0.885469	1754	3	-0.91961	0.54107	0.70675	0.957125	16496	2	-0.91961
mmu-mir-466b-8	1	0.021084	0.467841	1755	1	-3.5626	0.97885	0.97887	1	22028	0	-3.5626
Opa1	6	0.071245	0.888817	1756	4	-1.1359	0.32082	0.53377	0.945946	12145	1	-1.1359
Gm5868	6	0.071285	0.888817	1757	2	0.1916	0.39533	0.61461	0.945994	14166	1	0.1916
Atxn7l3b	6	0.071291	0.888817	1758	3	-0.21009	0.11448	0.2757	0.945946	5440	2	-0.21009
Gpr15	6	0.071291	0.888817	1759	3	-0.67356	0.42499	0.6343	0.948456	14687	1	-0.67356
Prkrip1	6	0.071291	0.888817	1760	3	-0.54271	0.26787	0.47443	0.945946	10585	1	-0.54271
Slc25a1	6	0.071291	0.888817	1761	2	-0.19479	0.51315	0.68865	0.95507	16073	2	-0.19479
Zfp451	6	0.071292	0.888817	1762	4	-1.1277	0.56121	0.71979	0.958845	16795	1	-1.1277
H2-T3	6	0.071792	0.89309	1763	4	-1.1636	0.84258	0.87654	0.989813	20016	1	-1.1636
Rhox2c	1	0.02147	0.469524	1764	1	-4.4058	0.97846	0.97849	1	22023	0	-4.4058
Arl6	6	0.071973	0.894824	1765	4	-1.0654	0.35948	0.57595	0.945946	13200	1	-1.0654
Medag	6	0.072011	0.894824	1766	3	-1.1114	0.42854	0.63643	0.949101	14727	1	-1.1114
Chrac1	6	0.07206	0.894947	1767	4	-0.94863	0.87019	0.89011	0.994624	20253	1	-0.94863
Apoa2	6	0.072138	0.895433	1768	4	-1.161	0.12516	0.29552	0.945946	5899	1	-1.161
Oog1	5	0.067257	0.862234	1769	2	-0.15585	0.50968	0.66018	0.950221	16020	2	-0.15585
Rbmx2	6	0.072221	0.895845	1770	4	-1.3254	0.68732	0.80806	0.971861	18663	2	-1.3254
Gm732	6	0.072251	0.895845	1771	3	-0.55956	0.536	0.70339	0.956897	16423	2	-0.55956
Ubr7	6	0.072422	0.896088	1772	3	-0.14428	0.32681	0.54043	0.945946	12312	3	-0.14428
Snapc3	6	0.072422	0.896088	1773	4	-0.87569	0.98559	0.98568	1	22145	0	-0.87569
Copb1	6	0.072428	0.896088	1774	4	-0.96347	0.99157	0.99157	1	22244	0	-0.96347
Gpcpd1	6	0.072621	0.89615	1775	3	-0.54587	0.58463	0.73546	0.962416	17129	2	-0.54587
Ear6	4	0.060088	0.815975	1776	2	-0.77141	0.44127	0.58921	0.945946	14918	2	-0.77141
Bnip1	6	0.072723	0.89615	1777	3	-0.49312	0.85996	0.88483	0.992807	20160	1	-0.49312
4930550C14Rik	6	0.072723	0.89615	1778	3	-0.30809	0.18849	0.38284	0.945946	8115	2	-0.30809
Elp6	6	0.072822	0.89615	1779	4	-1.1038	0.75682	0.84449	0.980457	19363	1	-1.1038
Ctu2	6	0.072837	0.89615	1780	3	-0.49459	0.92446	0.92601	0.99938	21008	1	-0.49459
Wdsub1	6	0.072868	0.89615	1781	3	-0.68503	0.48993	0.67395	0.951312	15716	1	-0.68503
Abt1	6	0.07298	0.897038	1782	4	-0.64721	0.59128	0.74006	0.963253	17220	2	-0.64721
Idh1	6	0.073126	0.897052	1783	3	-0.7478	0.17158	0.3629	0.945946	7566	1	-0.7478
Mei4	6	0.073126	0.897052	1784	2	0.56906	0.039747	0.12492	0.945946	2250	3	0.56906
Tubb3	6	0.073126	0.897052	1785	1	0.33276	0.30316	0.51403	0.945946	11623	3	0.33276
Mtg2	6	0.073139	0.897052	1786	4	-1.1295	0.89697	0.90581	0.996842	20578	1	-1.1295
Uspl1	6	0.073207	0.897275	1787	4	-1.0654	0.79797	0.85841	0.985034	19643	1	-1.0654
Slbp	6	0.073236	0.897275	1788	4	-0.99291	0.9678	0.96782	1	21792	0	-0.99291
Tomm20	6	0.073286	0.8974	1789	3	-0.22676	0.18631	0.38031	0.945946	8051	2	-0.22676
Lin54	6	0.073365	0.897441	1790	3	-0.84488	0.68338	0.80522	0.971492	18608	2	-0.84488
Olfr1303	6	0.073369	0.897441	1791	4	-1.3863	0.81508	0.86493	0.986641	19782	1	-1.3863
Cerkl	5	0.068613	0.872992	1792	3	-1.169	0.44561	0.6083	0.945994	15007	2	-1.169
Swt1	6	0.073409	0.897449	1793	4	-1.291	0.26051	0.46608	0.945946	10358	2	-1.291
Olfr1153	6	0.073552	0.89871	1794	2	-0.14311	0.94959	0.9497	1	21450	0	-0.14311
Vmn1r135	1	0.022182	0.481373	1795	1	-3.2932	0.97776	0.97778	1	22008	0	-3.2932
Gm10406	2	0.041133	0.675458	1796	2	-2.1891	0.97776	0.97792	1	22007	0	-2.1891
Rnf151	6	0.073706	0.898952	1797	3	-0.4195	0.63264	0.76855	0.966865	17847	2	-0.4195
Cep120	6	0.073753	0.898952	1798	3	-0.74294	0.92048	0.92273	0.998913	20942	1	-0.74294
Olfr137	6	0.073753	0.898952	1799	2	-0.19513	0.49845	0.6793	0.952878	15840	2	-0.19513
Olfr1286	6	0.073753	0.898952	1800	2	-0.21592	0.67935	0.80226	0.970801	18554	2	-0.21592
Dnmt3b	6	0.07377	0.898952	1801	4	-1.1245	0.10697	0.26168	0.945946	5123	2	-1.1245
Ik	6	0.073847	0.89931	1802	4	-0.96738	0.62811	0.76537	0.966535	17772	1	-0.96738
Sash3	6	0.073894	0.89931	1803	3	-0.0092991	0.21516	0.41407	0.945946	8959	3	-0.0092991
F2r	6	0.073958	0.89931	1804	4	-0.85785	0.96461	0.96463	1	21740	0	-0.85785
mmu-mir-5615-2	3	0.057312	0.797868	1805	1	-0.37969	0.77427	0.77427	0.967224	19467	0	-0.37969
Csde1	6	0.074168	0.90138	1806	2	-0.079191	0.82814	0.87025	0.98787	19889	1	-0.079191
Brpf1	6	0.074362	0.901946	1807	2	-0.15983	0.86619	0.88803	0.994113	20215	1	-0.15983
4932411E22Rik	6	0.074362	0.901946	1808	3	-0.23467	0.46403	0.65794	0.950195	15296	2	-0.23467
Gle1	6	0.074567	0.902418	1809	3	-0.93066	0.39484	0.61408	0.945994	14156	2	-0.93066
Ncoa5	6	0.074583	0.902418	1810	3	-0.33329	0.51488	0.68976	0.955298	16098	2	-0.33329
C530008M17Rik	6	0.074651	0.902418	1811	4	-1.0274	0.13079	0.3059	0.945946	6137	2	-1.0274
Ms4a4b	6	0.074687	0.902418	1812	3	-0.91887	0.12805	0.30083	0.945946	6009	2	-0.91887
Gorasp1	6	0.074846	0.902418	1813	2	-0.20665	0.59934	0.74549	0.963896	17336	1	-0.20665
Gm5535	6	0.074846	0.902418	1814	4	-0.61772	0.86803	0.88899	0.994446	20229	1	-0.61772
Olfr1333	6	0.074855	0.902418	1815	4	-1.1696	0.7036	0.82019	0.974509	18900	2	-1.1696
Guk1	6	0.074859	0.902418	1816	4	-1.0468	0.95404	0.95415	1	21535	0	-1.0468
Polr2a	6	0.07489	0.902418	1817	4	-1.1272	0.78211	0.85284	0.98319	19516	1	-1.1272
Ciapin1	6	0.07498	0.903028	1818	3	-0.27096	0.078249	0.20553	0.945946	3934	2	-0.27096
Olfr724	6	0.07511	0.903635	1819	3	-0.39205	0.12101	0.28783	0.945946	5733	3	-0.39205
Tor1b	6	0.075268	0.905056	1820	2	0.37083	0.16269	0.35229	0.945946	7271	3	0.37083
Mfsd11	5	0.070671	0.885469	1821	3	-1.4568	0.30518	0.49864	0.945946	11683	2	-1.4568
B3gnt4	6	0.075582	0.908349	1822	2	0.17335	0.69493	0.81369	0.973202	18771	2	0.17335
Serpina3b	5	0.071138	0.888817	1823	3	-1.0553	0.13367	0.28243	0.945946	6260	2	-1.0553
Ddx21	6	0.075847	0.909878	1824	3	-0.80949	0.92445	0.926	0.99938	21007	1	-0.80949
Defb33	6	0.075918	0.909978	1825	3	-0.5267	0.20322	0.40023	0.945946	8581	2	-0.5267
Fcf1	6	0.076044	0.910324	1826	4	-1.1381	0.99799	0.99799	1	22438	0	-1.1381
Bend5	6	0.076045	0.910324	1827	3	-0.46088	0.27715	0.48484	0.945946	10874	3	-0.46088
Oraov1	6	0.076068	0.910324	1828	4	-1.1027	0.96691	0.96693	1	21780	0	-1.1027
Hist1h3b	3	0.059441	0.81421	1829	1	0.90401	0.12194	0.21575	0.945946	5763	2	0.90401
Gnmt	5	0.07179	0.89309	1830	3	-1.2643	0.163	0.32488	0.945946	7281	2	-1.2643
Atp6v0a4	6	0.076471	0.91409	1831	3	-0.50176	0.24355	0.44659	0.945946	9852	2	-0.50176
Gm13272	3	0.059633	0.814711	1832	3	-0.70954	0.97663	0.97677	1	21984	0	-0.70954
Osbpl10	6	0.076546	0.91409	1833	2	-0.28517	0.1214	0.28854	0.945946	5747	2	-0.28517
Riok2	6	0.076661	0.91409	1834	4	-1.0929	0.90117	0.90854	0.997447	20632	1	-1.0929
Cmpk1	6	0.076836	0.91409	1835	3	-0.76878	0.58728	0.73723	0.962622	17165	2	-0.76878
Aff4	6	0.076894	0.91409	1836	4	-0.73549	0.065928	0.18055	0.945946	3404	2	-0.73549
Cap1	6	0.076894	0.91409	1837	3	-0.14853	0.35845	0.57485	0.945946	13179	2	-0.14853
Ube2d3	6	0.076903	0.91409	1838	3	-0.30054	0.28988	0.49918	0.945946	11252	3	-0.30054
2410015M20Rik	6	0.076906	0.91409	1839	4	-0.89386	0.88364	0.89764	0.996054	20404	1	-0.89386
Mapk8ip2	6	0.077069	0.915541	1840	4	-0.90215	0.040499	0.12659	0.945946	2290	1	-0.90215
9530003J23Rik	5	0.072746	0.89615	1841	3	-0.69323	0.46084	0.62042	0.945994	15243	1	-0.69323
Cenpa	6	0.077272	0.917477	1842	4	-1.1436	0.9918	0.9918	1	22248	0	-1.1436
Orc6	6	0.077317	0.917531	1843	4	-1.0521	0.99005	0.99008	1	22217	0	-1.0521
Gm166	6	0.077419	0.918262	1844	4	-0.94171	0.096301	0.24123	0.945946	4702	2	-0.94171
Gm4201	1	0.023717	0.500453	1845	1	-2.5561	0.97619	0.97622	1	21970	0	-2.5561
Gm609	6	0.077744	0.920087	1846	3	-0.6505	0.85011	0.88003	0.99115	20073	1	-0.6505
Gtf2f2	6	0.077752	0.920087	1847	4	-0.95243	0.96331	0.96333	1	21712	0	-0.95243
Max	6	0.077752	0.920087	1848	3	-0.24696	0.59289	0.74112	0.963496	17242	2	-0.24696
Rpf2	6	0.077817	0.920087	1849	4	-1.0821	0.75149	0.84282	0.979324	19340	1	-1.0821
6430550D23Rik	6	0.078044	0.920542	1850	3	-0.23771	0.053704	0.15503	0.945946	2864	3	-0.23771
Anln	6	0.078058	0.920542	1851	4	-1.0141	0.90815	0.91338	0.998231	20734	1	-1.0141
Art3	6	0.078293	0.922838	1852	4	-0.98813	0.97361	0.97368	1	21919	0	-0.98813
Cycs	5	0.07393	0.89931	1853	3	-0.84033	0.89521	0.8955	0.995529	20554	1	-0.84033
4930415L06Rik	6	0.078458	0.92346	1854	2	0.23968	0.13482	0.31326	0.945946	6305	3	0.23968
Ostc	6	0.078458	0.92346	1855	3	-0.74648	0.10187	0.25188	0.945946	4918	1	-0.74648
Fam210a	6	0.078488	0.92346	1856	3	-0.88447	0.29062	0.50002	0.945946	11271	2	-0.88447
Amn1	6	0.078509	0.92346	1857	4	-0.9729	0.95296	0.9531	1	21512	0	-0.9729
Vrk2	6	0.078552	0.923489	1858	3	-0.52227	0.24082	0.44346	0.945946	9761	2	-0.52227
Arhgef10l	5	0.074466	0.902418	1859	3	-0.64644	0.40468	0.57611	0.945946	14369	1	-0.64644
Igfl3	6	0.078788	0.924823	1860	3	-0.15375	0.81014	0.86297	0.986215	19744	1	-0.15375
4932438A13Rik	6	0.078788	0.924823	1861	2	-0.45387	0.7358	0.8381	0.978354	19246	1	-0.45387
Emc3	6	0.078788	0.924823	1862	3	-0.42092	0.97083	0.97087	1	21865	0	-0.42092
Olfr1179	6	0.079305	0.92844	1863	3	-1.0481	0.36366	0.58051	0.945946	13320	2	-1.0481
Mrps5	6	0.079356	0.92844	1864	3	-0.85172	0.62048	0.76012	0.966145	17662	2	-0.85172
Cenpp	6	0.079425	0.92844	1865	3	-0.88075	0.79727	0.85815	0.985034	19638	1	-0.88075
Trim40	6	0.079454	0.92844	1866	4	-0.86067	0.89913	0.90719	0.996964	20609	1	-0.86067
Stxbp3a	6	0.079608	0.92844	1867	3	-0.72971	0.66297	0.79019	0.96959	18307	2	-0.72971
Psmc2	6	0.079645	0.92844	1868	4	-1.1964	0.4254	0.63455	0.948482	14693	2	-1.1964
Pacs2	6	0.079674	0.92844	1869	4	-0.97655	0.090095	0.22906	0.945946	4441	2	-0.97655
Cfl1	6	0.079783	0.92844	1870	4	-1.0315	0.36887	0.58614	0.945946	13448	1	-1.0315
Cyp2c54	6	0.079822	0.92844	1871	3	-0.65593	0.49565	0.67752	0.952855	15790	2	-0.65593
Eqtn	6	0.079845	0.92844	1872	4	-1.0451	0.94468	0.94482	1	21358	0	-1.0451
Phldb3	6	0.07987	0.92844	1873	4	-1.0027	0.57746	0.73065	0.961415	17026	2	-1.0027
Snrpb2	6	0.079874	0.92844	1874	3	-1.0336	0.98985	0.98989	1	22211	0	-1.0336
Olfr1181	5	0.075638	0.908539	1875	3	-1.2957	0.86601	0.87052	0.98787	20213	1	-1.2957
Gm3706	3	0.062883	0.835905	1876	2	-1.8221	0.69879	0.7024	0.956473	18828	1	-1.8221
Rif1	6	0.079909	0.92844	1877	3	-0.72255	0.69906	0.81681	0.973699	18836	2	-0.72255
Ddx28	6	0.079941	0.92844	1878	4	-1.0331	0.87552	0.89301	0.995171	20319	1	-1.0331
Sh2d1b1	6	0.079956	0.92844	1879	3	-0.18064	0.11922	0.28455	0.945946	5652	3	-0.18064
Gykl1	6	0.080001	0.928481	1880	4	-0.95431	0.24664	0.45008	0.945946	9950	2	-0.95431
Olfr247	5	0.07584	0.909878	1881	2	0.52908	0.26416	0.46325	0.945946	10467	3	0.52908
Gm12789	6	0.080097	0.928701	1882	3	-0.56034	0.80238	0.86001	0.985371	19684	1	-0.56034
Galc	6	0.080157	0.928701	1883	3	-0.54886	0.37389	0.59152	0.945946	13597	3	-0.54886
Acad10	6	0.080261	0.928701	1884	2	0.20894	0.63909	0.77311	0.967224	17944	2	0.20894
Krt33a	6	0.080261	0.928701	1885	2	-0.17488	0.86077	0.88523	0.992807	20170	1	-0.17488
Vmn1r181	6	0.080286	0.928701	1886	3	-1.154	0.1989	0.39509	0.945946	8447	2	-1.154
Slit2	6	0.080306	0.928701	1887	2	0.15319	0.27369	0.48095	0.945946	10777	3	0.15319
Trim50	5	0.076199	0.911411	1888	3	-1.4135	0.66674	0.76719	0.966772	18365	1	-1.4135
Rad51c	6	0.080415	0.929484	1889	4	-1.0058	0.97927	0.97936	1	22041	0	-1.0058
Ticrr	6	0.080476	0.929722	1890	4	-1.2501	0.99308	0.9931	1	22274	0	-1.2501
Taz	6	0.080536	0.929934	1891	2	0.52601	0.2293	0.43038	0.945946	9414	3	0.52601
Hist1h2ac	4	0.066949	0.861187	1892	2	-0.67207	0.23266	0.38296	0.945946	9521	2	-0.67207
1700015G11Rik	6	0.080647	0.930373	1893	3	-0.6293	0.40641	0.62314	0.945994	14407	2	-0.6293
Pygo1	6	0.080663	0.930373	1894	3	-0.50669	0.68424	0.80586	0.971681	18622	2	-0.50669
Olfr273	6	0.080697	0.930373	1895	4	-1.1587	0.20194	0.39875	0.945946	8537	1	-1.1587
Cd2bp2	6	0.080828	0.931083	1896	4	-1.0454	0.97186	0.97191	1	21886	0	-1.0454
Ssxb9	5	0.076742	0.91409	1897	3	-1.3675	0.42747	0.59398	0.945946	14715	2	-1.3675
Dach1	6	0.080841	0.931083	1898	4	-1.1122	0.96791	0.96793	1	21793	0	-1.1122
Msrb2	6	0.081042	0.932459	1899	2	-0.15054	0.34915	0.56481	0.945946	12915	2	-0.15054
Lgi2	6	0.081042	0.932459	1900	2	0.40944	0.0026139	0.012989	0.945946	224	3	0.40944
Ccl6	6	0.081277	0.934208	1901	3	-0.33765	0.07653	0.20208	0.945946	3854	3	-0.33765
Il23r	6	0.08149	0.935297	1902	3	-0.55255	0.58028	0.73255	0.961607	17066	2	-0.55255
Ube2d2a	6	0.081513	0.935297	1903	3	-0.57982	0.047094	0.1409	0.945946	2579	2	-0.57982
Olfr725	5	0.077568	0.919547	1904	3	-1.4709	0.89949	0.89956	0.9962	20614	1	-1.4709
Atp5h	6	0.081594	0.935297	1905	4	-1.0309	0.96178	0.96184	1	21682	0	-1.0309
Atp11b	6	0.081666	0.935297	1906	4	-0.98068	0.64766	0.77921	0.968405	18076	2	-0.98068
Hist1h4h	6	0.081777	0.935297	1907	3	0.14167	0.026345	0.092075	0.945946	1627	3	0.14167
Ino80b	6	0.08184	0.935297	1908	3	-0.63944	0.65904	0.78733	0.969199	18243	1	-0.63944
Vmn1r8	6	0.08186	0.935297	1909	3	-0.63499	0.039847	0.12514	0.945946	2254	2	-0.63499
Hist1h1a	6	0.081884	0.935297	1910	4	-1.2266	0.79706	0.85808	0.985034	19635	1	-1.2266
Rundc1	5	0.077954	0.920269	1911	1	0.38992	0.36595	0.54557	0.945946	13375	2	0.38992
Ginm1	5	0.077954	0.920269	1912	1	0.48134	0.0037781	0.015888	0.945946	296	3	0.48134
9930111J21Rik1	6	0.081908	0.935297	1913	2	0.14632	0.67906	0.80203	0.970801	18549	2	0.14632
Armc5	6	0.081908	0.935297	1914	3	-0.74891	0.54492	0.70924	0.957312	16562	2	-0.74891
Atp2b3	6	0.081908	0.935297	1915	2	0.12662	0.37938	0.59748	0.945946	13744	3	0.12662
Mxra8	6	0.081908	0.935297	1916	1	-0.30772	0.15322	0.3408	0.945946	6954	2	-0.30772
Snrnp70	6	0.081999	0.935767	1917	4	-1.2622	0.29766	0.50783	0.945946	11466	2	-1.2622
Gm14374	1	0.025549	0.514575	1918	1	-2.7973	0.97435	0.97439	1	21934	0	-2.7973
Adam9	6	0.082071	0.935767	1919	4	-1.1089	0.39587	0.61516	0.945994	14180	1	-1.1089
Vmn1r212	6	0.082075	0.935767	1920	3	-0.55061	0.95996	0.95997	1	21644	0	-0.55061
Sub1	6	0.082198	0.935767	1921	4	-1.1496	0.97047	0.97049	1	21852	0	-1.1496
Olfr1336	6	0.082241	0.935767	1922	4	-0.95771	0.89892	0.90706	0.996867	20608	1	-0.95771
Rbm42	6	0.082401	0.935767	1923	4	-1.0158	0.030111	0.10326	0.945946	1796	1	-1.0158
Aebp1	6	0.082454	0.935767	1924	3	-0.4777	0.33299	0.54723	0.945946	12497	3	-0.4777
St3gal1	6	0.082471	0.935767	1925	3	0.22691	0.041638	0.12906	0.945946	2331	3	0.22691
Gla	6	0.082471	0.935767	1926	2	0.24801	0.13795	0.31895	0.945946	6445	3	0.24801
Olfr889	6	0.082471	0.935767	1927	2	0.53357	0.25736	0.46247	0.945946	10258	3	0.53357
4931406B18Rik	6	0.082471	0.935767	1928	2	0.33162	0.42471	0.63413	0.948349	14684	2	0.33162
Atp6v1a	6	0.082508	0.935767	1929	3	-1.0649	0.63237	0.76835	0.966831	17841	2	-1.0649
Supt16	6	0.082555	0.935767	1930	4	-1.2828	0.63979	0.77361	0.967224	17957	2	-1.2828
Nufip2	6	0.082568	0.935767	1931	4	-0.98223	0.92777	0.92882	0.999705	21065	1	-0.98223
Tpgs2	6	0.082705	0.936858	1932	3	-1.009	0.88023	0.89566	0.995529	20370	1	-1.009
Phkb	6	0.082798	0.937443	1933	3	-0.85595	0.39468	0.61392	0.945994	14151	2	-0.85595
Olfr378	6	0.0829	0.937749	1934	4	-1.2759	0.99568	0.99572	1	22350	0	-1.2759
Vps4b	6	0.082916	0.937749	1935	4	-0.87327	0.83014	0.87107	0.98787	19905	1	-0.87327
Hpcal1	6	0.082982	0.937749	1936	3	-0.74446	0.20074	0.39729	0.945946	8502	2	-0.74446
Fam134c	6	0.083054	0.937749	1937	4	-0.96749	0.78157	0.85266	0.98319	19514	1	-0.96749
Fam170a	6	0.083061	0.937749	1938	3	-0.66784	0.78864	0.8551	0.983895	19574	1	-0.66784
Cpsf6	6	0.083091	0.937749	1939	2	0.27491	0.6318	0.76793	0.966831	17830	1	0.27491
Twistnb	6	0.083115	0.937749	1940	3	-0.54459	0.85269	0.88127	0.991442	20102	1	-0.54459
Idh3a	6	0.083196	0.938204	1941	3	-0.70396	0.1263	0.29764	0.945946	5936	2	-0.70396
Fscn1	6	0.083322	0.938836	1942	2	0.11648	0.039288	0.12389	0.945946	2234	2	0.11648
Syap1	6	0.083335	0.938836	1943	4	-0.98759	0.82116	0.86736	0.987351	19828	1	-0.98759
Vmn2r39	3	0.066268	0.854845	1944	1	-0.18999	0.13028	0.22648	0.945946	6118	1	-0.18999
Cers5	6	0.083681	0.941323	1945	3	-0.35865	0.2799	0.48796	0.945946	10945	3	-0.35865
Lce1h	6	0.083681	0.941323	1946	3	-0.62913	0.48186	0.66893	0.951153	15573	2	-0.62913
Klhl35	6	0.083681	0.941323	1947	1	0.11604	0.52391	0.69558	0.955657	16239	2	0.11604
Tubgcp4	6	0.083813	0.941877	1948	4	-1.1066	0.4225	0.63281	0.947688	14656	2	-1.1066
mmu-mir-7042	4	0.069798	0.879381	1949	1	1.0677	0.024605	0.072791	0.945946	1536	3	1.0677
Tubb4a	6	0.083921	0.942622	1950	4	-1.057	0.12101	0.28783	0.945946	5732	2	-1.057
mmu-mir-684-2	3	0.066873	0.860692	1951	1	-0.18701	0.21179	0.32917	0.945946	8849	1	-0.18701
Myo1c	6	0.083996	0.942957	1952	3	-0.13186	0.5997	0.74573	0.963896	17344	1	-0.13186
Vmn1r93	1	0.026364	0.524462	1953	1	-3.1575	0.97353	0.97359	1	21917	0	-3.1575
Aurkb	6	0.084042	0.942957	1954	3	-1.0208	0.068893	0.18666	0.945946	3524	2	-1.0208
1700001F09Rik	2	0.048581	0.734807	1955	1	-1.5963	0.36405	0.39295	0.945946	13332	1	-1.5963
Elf2	6	0.084075	0.942957	1956	3	-0.59962	0.89535	0.90478	0.996766	20557	1	-0.59962
3110009E18Rik	6	0.084254	0.943353	1957	3	-0.50427	0.943	0.94318	1	21331	0	-0.50427
Zpld1	6	0.084254	0.943353	1958	2	0.36274	0.18716	0.3813	0.945946	8072	3	0.36274
Tubgcp6	6	0.08433	0.943483	1959	3	-0.69171	0.68894	0.8093	0.972197	18687	2	-0.69171
BC061212	2	0.048973	0.736973	1960	2	-1.7148	0.97332	0.9735	1	21912	0	-1.7148
Emc7	6	0.084624	0.944714	1961	3	-0.71267	0.60037	0.7462	0.963896	17350	2	-0.71267
Ptpn23	6	0.084648	0.944714	1962	4	-0.97052	0.66151	0.78913	0.969218	18285	2	-0.97052
Junb	6	0.084719	0.945038	1963	2	-0.72664	0.83865	0.87476	0.989351	19972	1	-0.72664
Lphn2	6	0.084797	0.945445	1964	3	-1.0027	0.93581	0.9361	1	21202	1	-1.0027
Clhc1	6	0.084884	0.945944	1965	3	-0.47718	0.33242	0.54661	0.945946	12481	3	-0.47718
Terf2ip	6	0.085086	0.947265	1966	3	-0.96297	0.13109	0.30644	0.945946	6152	2	-0.96297
Tnik	6	0.085337	0.947831	1967	3	-0.8621	0.099559	0.24753	0.945946	4831	2	-0.8621
Caap1	6	0.085346	0.947831	1968	3	-0.32417	0.72133	0.83359	0.976559	19175	2	-0.32417
Tmem206	6	0.085346	0.947831	1969	2	0.70635	0.059226	0.16668	0.945946	3089	3	0.70635
Mocs1	6	0.085346	0.947831	1970	1	0.35699	0.38803	0.6068	0.945994	13965	3	0.35699
Timm10	6	0.08543	0.948302	1971	4	-1.1844	0.7477	0.84166	0.979113	19318	1	-1.1844
Ncl	6	0.085495	0.948565	1972	3	-0.81536	0.97596	0.97605	1	21965	0	-0.81536
Ing4	6	0.085555	0.948736	1973	4	-0.9231	0.54321	0.70815	0.957312	16537	2	-0.9231
Lsm10	6	0.085595	0.948736	1974	4	-1.0207	0.20198	0.39879	0.945946	8540	1	-1.0207
Bcl2l10	6	0.08565	0.948892	1975	2	-0.24528	0.18554	0.37937	0.945946	8027	2	-0.24528
Ly96	6	0.085844	0.949382	1976	3	-0.94306	0.85268	0.88127	0.991442	20101	1	-0.94306
Mrps2	6	0.085858	0.949382	1977	3	-0.25614	0.43841	0.64233	0.949199	14871	2	-0.25614
Robo3	6	0.085858	0.949382	1978	2	-0.36596	0.71381	0.82789	0.975781	19057	1	-0.36596
Stard3	6	0.085862	0.949382	1979	4	-1.0222	0.66684	0.79305	0.969943	18368	2	-1.0222
V1rd18	4	0.071603	0.891712	1980	2	-0.64885	0.15848	0.30939	0.945946	7128	2	-0.64885
Ppp2r3c	6	0.085925	0.949591	1981	3	-0.95029	0.53504	0.70277	0.956511	16413	2	-0.95029
A630007B06Rik	6	0.085965	0.949591	1982	3	-0.75996	0.28968	0.49896	0.945946	11245	2	-0.75996
mmu-mir-466b-6	1	0.027185	0.53358	1983	1	-3.0874	0.97271	0.97272	1	21905	0	-3.0874
Kcnip4	6	0.086193	0.951186	1984	4	-0.92442	0.059349	0.16695	0.945946	3094	1	-0.92442
Ipo7	6	0.086266	0.951343	1985	4	-1.193	0.96209	0.96213	1	21688	0	-1.193
Adnp	6	0.086311	0.951343	1986	4	-1.0567	0.3465	0.56187	0.945946	12854	2	-1.0567
Col19a1	6	0.086494	0.951343	1987	2	-0.3801	0.019061	0.069283	0.945946	1269	1	-0.3801
Psme1	6	0.086494	0.951343	1988	3	-0.095462	0.24957	0.45342	0.945946	10041	3	-0.095462
Smarce1	6	0.086494	0.951343	1989	2	0.43318	0.198	0.39404	0.945946	8415	3	0.43318
Pgam5	6	0.086494	0.951343	1990	2	0.2415	0.11958	0.28521	0.945946	5672	3	0.2415
Ccl27b	4	0.0725	0.89615	1991	3	-1.3043	0.7119	0.7415	0.963656	19024	1	-1.3043
Clec12a	6	0.087089	0.954068	1992	3	-0.48783	0.14324	0.32852	0.945946	6648	1	-0.48783
Vmn1r229	6	0.087089	0.954068	1993	3	-0.35785	0.63025	0.76684	0.966772	17811	2	-0.35785
Plrg1	6	0.087089	0.954068	1994	2	0.055255	0.36285	0.57962	0.945946	13296	3	0.055255
C1galt1c1	6	0.087089	0.954068	1995	2	0.15807	0.36486	0.58184	0.945946	13347	3	0.15807
Gbe1	6	0.087089	0.954068	1996	2	-0.4378	0.68384	0.80556	0.971492	18617	2	-0.4378
Gm9047	6	0.087089	0.954068	1997	2	0.07111	0.64519	0.77747	0.968405	18034	2	0.07111
Pdik1l	6	0.087254	0.954068	1998	1	-0.037193	0.81828	0.86621	0.986837	19807	1	-0.037193
St3gal4	6	0.087254	0.954068	1999	3	-0.89477	0.90574	0.91166	0.99819	20694	1	-0.89477
[truncated: 20,679 more rows]
