# Supplementary material for: A Commander-independent function of COMMD3 in endosomal trafficking
Source: eLife. 2025 Aug 21;14:RP105264. doi: 10.7554/eLife.105264 (PMC12370252; doi:10.7554/eLife.105264)
Supplement: Figure 2—source data 3. [file elife-105264-fig2-data3.xlsx]

## Sheet: Fig2_c adipocyte GLUT-SPR
Vector Control	Commd3 KO	VC + insulin	KO + insulin
0.87132	0.716608	6.71089	5.97735
1.14115	0.747918	7.54639	5.3915
0.987532	0.840304	7.85321	4.69646

## Sheet: VC vs. KO t tests
	Commd3 KO	KO + insulin
	vs.	vs.
	Vector Control	VC + insulin
Unpaired t test
P value	0.0553	0.0161
P value summary	ns	*
Significantly different (P < 0.05)?	No	Yes
One- or two-tailed P value?	Two-tailed	Two-tailed
t, df	t=2.678, df=4	t=4.002, df=4
How big is the difference?
Mean of column A	1	7.37
Mean of column B	0.7683	5.355
Difference between means (B - A) ± SEM	-0.2317 ± 0.08651	-2.015 ± 0.5035
95% confidence interval	-0.4719 to 0.008480	-3.413 to -0.6170
R squared (eta squared)	0.642	0.8001
F test to compare variances
F, DFn, Dfd	4.429, 2, 2	1.176, 2, 2
P value	0.3684	0.919
P value summary	ns	ns
Significantly different (P < 0.05)?	No	No
Data analyzed
Sample size, column A	3	3
Sample size, column B	3	3
