# Supplementary material for: A Commander-independent function of COMMD3 in endosomal trafficking
Source: eLife. 2025 Aug 21;14:RP105264. doi: 10.7554/eLife.105264 (PMC12370252; doi:10.7554/eLife.105264)
Supplement: Figure 2—source data 4. [file elife-105264-fig2-data4.xlsx]

## Sheet: Fig2_b
Vector Control	VC + insulin	VC + ins +wrt	Commd3 KO	KO + insulin	KO + ins + wrt
0.869731	2.04819	0.794677	0.50602	0.770661	0.322529
1.00738	2.58788	0.642605	0.468821	0.880669	0.327325
1.12288	1.67859	0.453925	0.492186	0.380383	0.320097

## Sheet: KO vs. VC t-test
Column D	Commd3 KO	KO + insulin	KO + ins + wrt
vs.	vs.	vs.	vs.
Column A	Vector Control	VC + insulin	VC + ins +wrt
Unpaired t test
P value	0.0023	0.0094	0.0357
P value summary	**	**	*
Significantly different (P < 0.05)?	Yes	Yes	Yes
One- or two-tailed P value?	Two-tailed	Two-tailed	Two-tailed
t, df	t=6.908, df=4	t=4.688, df=4	t=3.115, df=4
How big is the difference?
Mean of column	1	2.105	0.6304
Mean of column	0.489	0.6772	0.3233
Difference between means (D - A) ± SEM	-0.5110 ± 0.07397	-1.428 ± 0.3045	-0.3071 ± 0.09858
95% confidence interval	-0.7164 to -0.3056	-2.273 to -0.5821	-0.5808 to -0.03339
R squared (eta squared)	0.9227	0.846	0.7081
Data analyzed
Sample size	3	3	3
Sample size	3	3	3
