# Supplementary material for: A Commander-independent function of COMMD3 in endosomal trafficking
Source: eLife. 2025 Aug 21;14:RP105264. doi: 10.7554/eLife.105264 (PMC12370252; doi:10.7554/eLife.105264)
Supplement: Figure 3—source data 1. [file elife-105264-fig3-data1.xlsx]

## Sheet: Fig. 3b Normalized MFI
Vector Control	Vector Control + insulin	Commd3 KO	Commd3 KO + insulin
1.30431	0.943872	0.775869	1.82665
0.818633	0.953036	0.898053	1.96411
1.12715	1.05078	1.04162	1.87858
1.07216	1.15769	1.13937	1.82971
0.836961	1.18213	1.18824	1.77472
0.907216	1.11798		1.6617
0.928599	1.1302		1.7564
1.00496	1.04467		1.75945
	1.05689		1.63421
			1.05689
			1.28599
			1.43261
			1.48148
			1.46315
			1.55785
			1.32264
			1.20657
			1.15158
			1.14853

## Sheet: t test
Table Analyzed	Copy of EEA1 Average size
Column D	Commd3 KO + insulin
vs.	vs.
Column B	Vector Control + insulin
Unpaired t test
P value	<0.0001
P value summary	****
Significantly different (P < 0.05)?	Yes
One- or two-tailed P value?	Two-tailed
t, df	t=4.835, df=26
How big is the difference?
Mean of column B	1.071
Mean of column D	1.536
Difference between means (D - B) ± SEM	0.4657 ± 0.09631
95% confidence interval	0.2677 to 0.6636
R squared (eta squared)	0.4735
F test to compare variances
F, DFn, Dfd	11.05, 18, 8
P value	0.0017
P value summary	**
Significantly different (P < 0.05)?	Yes
Data analyzed
Sample size, column B	9
Sample size, column D	19
