# Supplementary material for: A Commander-independent function of COMMD3 in endosomal trafficking
Source: eLife. 2025 Aug 21;14:RP105264. doi: 10.7554/eLife.105264 (PMC12370252; doi:10.7554/eLife.105264)
Supplement: Figure 3—source data 2. [file elife-105264-fig3-data2.xlsx]

## Sheet: Fig. 3c Normalized GLUT-SPR MFI
WT + insulin	Commd3 KO + insulin
1	29.833
1	59.12
1	19.035
1	43.909
1.25	77.429
0.944	14.61
1	37.105
1	19.5
1	57.583
1	39.9
1	37.677
0.919	18.5
1	20.722
1	15
1	71.532
1	61.62
1	54.875
1	53.634
1.045	9.143
1.065	8
1.265	39.257
1	47.717
1	12.667
1	60.365
1	49.768
1	17.88
1	17.383
1	82.333
1	46.022
1	7.875
1	6
1	50.038
1	31.5
1	22.625
1	9.375
1	47.833
1	20.556
1	22.5
1	29.657
1	21.857
1	32.654
1	27.157
1	25.667
15.818	21.455
28.759	16.288
86.074	37.778
4.341	12.442
46.533	36
22.424	17.69
49.423	46.618
5.849	61.445
39.829	40
1	14.5
37.889	19.763
1	19.4
25.181	41
3.916	18.995
1	27.411
47.312	40.571
1	27.6
1	3.5
6.444	16.714
1	14.308
1	27
61.053	53
1	24.693
26.138	38.706
1	20
1	49.55
1	37
1.368	53.978
1	14
1	15.908
1.043	34.875
1	5
22.856	43.468
26.8	40.841
1.222	42
1.014	31.918
0.987	45.556
20.917	36.333
26.085	19.128
1	38.19
5.267	22.259
19.352	30.323
3.583	40.31
1.323	32.5
16.167	62.667
1	39.65
1	18.25
1	39.2
22.989	56.186
1	43.234
5.446	49.684
1.944	7
21.05	29.2
19.667	19
1.241	55.25
33.705	24.575
1.312	23.5
27.5	81.333
68.821	25.014
1.432	41.375
1.958	16
1	48.556
2.71	11.88
2.263	43.761
29.405	36.333
2.269	70.375
1	33.412
1.25	17.857
1.455	42
44.145	50.667
1	49.907
1.647	44.492
3.591	14.357
12.759	19
6.14	35.75
3.536	3
1	48.778
16.603	25.275
18.343	45.309
4.053	33.525
1	46.636
1.755	18.562
30.278	27.231
27.167	36.607
43.178	6.75
34.625	10.2
3.674	40.75
37.413	29.929
3.538	39.507
1	78.6
22.333	18.481
15.578	35.083
1.227	38.552
46.432	13
12.017	19.508
3.18	14.5
3.222	32.411
1	36.339
1.625	51.517
1.843	36.083
1	21.846
1.026	60
1.667	18.708
1	64.162
45.59	32.779
16.133	40.833
1.037	24.039
6.688	41.667
1	18.416
2.183	18.889
13.25	49.815
1	23.5
1	17.679
1.102	42.15
1	53.828
1	11.077
1	25.25
1.208	13.5
1	48.233
1.312	22.5
6.348	24.594
2.03	65.5
14.623	18.625
1	3.25
1	22
3.343	26.833
1	46.944
3.2	21.286
1	43.814
1	5.133
1.621	16.987
3.179	24.2
20.895	56.52
3.682	77.158
4.577	38.181
25.452	9.889
1	33.333
10.138	3.333
1	23.333
1	27.913
1.212	30.667
5.887	13.429
38.63	8.714
1.218	13.455
6.635	47.969
1	32.448
2	85
1.133	31.621
2.2	33.708
3.983	25.949
29.472	34.881
38.778	55.056
1.117	39.476
1	48.421
5.333	34.6
30.154	32.667
1	30.171
3.663	52.167
54.971	29.179
1.442	3
11.583	38.841
55.75	24.324
34.667	25.75
1	6.5
16.235	25.409
1	21.162
8.682	22.667
1.643	40.389
1	41.933
1.905	11.7
44.278	12.76
7.52	7.125
1	27.207
14.864	9.8
45.333	6.167
48.259	43.275
2.652	12.333
2.812	27.509
51.981	47.286
1	10
18.036	18.173
15.576	13.016
20.565	40.56
5.417	40.784
15.276	26.259
1	29.733
46.926	40
1	17.25
0.911	18.393
37.143	29
1	18.867
74.684	55.167
6.519	52.133
50.889	26.2
50.222	83.25
1	23.903
1	69.892
1	12.444
57.909	14.375
51.492	11.8
1	15.222
1	25.62
6.6	32.841
1	30.481
59.844	20.592
40.636	24
33.812	34.26
1	49.886
1	29.767
39.556	26.5
33.257	37.375
1	10.2
1	9.444
1	12.769
1	55.167
0.971	51.811
36.704	35.184
1	37.833
39.786	47.25
4.158	53.498
1	17.5
1	35.718
1	16.571
63.75	8.8
1	17.286
1	58.163
1	27.909
1	57.091
1	35.833
1	19.588
1	46.042
1	45.497
0.875	17.75
1	22.635
1	31.118
1	18.333
1	28.391
1	51.719
0.944	14.333
1	10.158
1	40.446
1.25	31.327
1	23.154
1	20
1.133	7.5
1	29.5
1.333	18.167
1	37.889
1	39.8
1	33
1.1	48.521
1	5
1.031	27.32
1.227	54
1	13.5
1.044	33.933
1	37.339
1	21.438
1	22.75
1	32.385
1	19.8
1	37.179
1	17.75
1.217	30.819
1	20.033
1	25
1.083	22
0.886	33
1	36.125
1	20
1	33.5
1.833	41.949
	45.5
	12.25
	24.356
	28.027
	35
	8
	28.314
	44.727
	43.366
	31.961
	38.417
	35.887
	8.857
	34.625
	15.609
	52.022
	31.842
	60.761
	42.143
	57.833
	15.929
	69.372
	19.64
	53.25
	34.975
	28.886
	52.16
	22.831
	13.333
	17.682
	20.5
	45.247
	35.8
	45
	30.5
	59.352
	58.84
	57.522
	44.625
	51.314
	48.419
	24.667
	61.048
	26
	20.545
	23.3
	37.095
	50.287
	55.571
	19.923
	15
	35.667
	22.217
	59
	35
	50.036
	42.066
	43.125
	40.34
	25.125
	20.733
	54.528
	31.174
	16.222
	14.625
	28.154
	8.636
	26
	29.435
	25.688
	18.385
	38.464
	23.559
	14
	32.7
	34.031
	31.182
	23.429
	10.5
	21.231
	24.167
	11.316
	32.333
	53.056
	47.737
	37.269
	36.289
	93
	18
	12.444
	15.125
	38.364
	42
	66.457
	44.833
	48.2
	46.045
	49.381
	67.773
	40.611
	37.083
	58.455
	19.633
	21.818
	18.6
	53.517
	5
	44.816
	9.28
	18.542
	26.5
	15.875
	18.229
	26.5
	24.4
	37.5
	33.214
	9
	54.571
	23.867
	11.5
	48
	19.36
	31.641
	61
	4
	30.8
	22.589
	33.286
	15
	27
	37.892
	29.483
	32.2
	20.947
	3
	47
	19
	32.125
	38.238
	29.75
	29.5
	13.361
	20.091
	15.152
	10.227
	42.458
	54.265
	24.815
	23.732

## Sheet: t test
Column B	Commd3 insulin
vs.	vs.
Column A	WT insulin
Unpaired t test
P value	<0.0001
P value summary	****
Significantly different (P < 0.05)?	Yes
One- or two-tailed P value?	Two-tailed
t, df	t=18.54, df=778
How big is the difference?
Mean of column A	9.656
Mean of column B	31.83
Difference between means (B - A) ± SEM	22.18 ± 1.196
95% confidence interval	19.83 to 24.53
R squared (eta squared)	0.3064
F test to compare variances
F, DFn, Dfd	1.035, 464, 314
P value	0.7425
P value summary	ns
Significantly different (P < 0.05)?	No
Data analyzed
Sample size, column A	315
Sample size, column B	465
