# Supplementary material for: A Commander-independent function of COMMD3 in endosomal trafficking
Source: eLife. 2025 Aug 21;14:RP105264. doi: 10.7554/eLife.105264 (PMC12370252; doi:10.7554/eLife.105264)
Supplement: Figure 3—source data 3. [file elife-105264-fig3-data3.xlsx]

## Sheet: Fig. 3E Rab5-GLUT-SPR Coloc.
WT	Commd3 KO
0.305	0.347
0.247	0.343
0.22	0.333
0.196	0.348
0.196	0.337
0.215	0.354
0.238	0.293
0.237	0.389
0.216	0.291
0.205	0.266
0.155	0.238
0.108	0.242
0.137	0.282
0.176	0.282
0.243	0.291

## Sheet: t test
Column B	Commd3 KO
vs.	vs.
Column A	WT
Unpaired t test
P value	<0.0001
P value summary	****
Significantly different (P < 0.05)?	Yes
One- or two-tailed P value?	Two-tailed
t, df	t=6.035, df=28
How big is the difference?
Mean of column A	0.2063
Mean of column B	0.3091
Difference between means (B - A) ± SEM	0.1028 ± 0.01703
95% confidence interval	0.06791 to 0.1377
R squared (eta squared)	0.5654
F test to compare variances
F, DFn, Dfd	1.204, 14, 14
P value	0.7335
P value summary	ns
Significantly different (P < 0.05)?	No
Data analyzed
Sample size, column A	15
Sample size, column B	15
