# Supplementary material for: A Commander-independent function of COMMD3 in endosomal trafficking
Source: eLife. 2025 Aug 21;14:RP105264. doi: 10.7554/eLife.105264 (PMC12370252; doi:10.7554/eLife.105264)
Supplement: Figure 4—figure supplement 1—source data 1. [file elife-105264-fig4-figsupp1-data1.xlsx]

## Sheet: Fig. S1A Norm. Total TfR
Vector Control	Commd3 KO	Commd3 KO + Rescue	Ccdc93 KO	Vps35l KO	Commd3 O.E.
1.07751	0.65007	0.914868	0.831126	1.33609	0.781004
0.91701	0.645468	0.757346	1.56613	1.98086	1.30835
1.00549	0.568386	0.511708	0.651264	0.92812	0.628159

## Sheet: t test
Unpaired t test	Vector Control vs. Commd3 KO	Vector Control vs. Commd3 KO + Rescue	Vector Control vs. Ccdc93 KO	Vector Control vs. Vps35l KO	Vector Control vs. Commd3 O.E.
P value	0.0021	0.0973	0.9573	0.2516	0.6788
P value summary	**	ns	ns	ns	ns
Significantly different (P < 0.05)?	Yes	No	No	No	No
One- or two-tailed P value?	Two-tailed	Two-tailed	Two-tailed	Two-tailed	Two-tailed
t, df	t=7.086, df=4	t=2.156, df=4	t=0.05701, df=4	t=1.339, df=4	t=0.4458, df=4
How big is the difference?
Mean of column A	1	1	1	1	1
Mean of column E	0.6213	0.728	1.016	1.415	0.9058
Difference between means (E - A) ± SEM	-0.3787 ± 0.05344	-0.2720 ± 0.1262	0.01617 ± 0.2837	0.4150 ± 0.3099	-0.09416 ± 0.2112
95% confidence interval	-0.5271 to -0.2303	-0.6223 to 0.07823	-0.7714 to 0.8037	-0.4455 to 1.276	-0.6805 to 0.4922
R squared (eta squared)	0.9262	0.5376	0.000812	0.3095	0.04734
F test to compare variances
F, DFn, Dfd	3.069, 2, 2	6.388, 2, 2	36.35, 2, 2	43.60, 2, 2	19.71, 2, 2
P value	0.4916	0.2707	0.0535	0.0448	0.0966
P value summary	ns	ns	ns	*	ns
Significantly different (P < 0.05)?	No	No	No	Yes	No
Data analyzed
Sample size, column A	3	3	3	3	3
Sample size, column E	3	3	3	3	3
