# Supplementary material for: A Commander-independent function of COMMD3 in endosomal trafficking
Source: eLife. 2025 Aug 21;14:RP105264. doi: 10.7554/eLife.105264 (PMC12370252; doi:10.7554/eLife.105264)
Supplement: Figure 4—figure supplement 1—source data 2. [file elife-105264-fig4-figsupp1-data2.xlsx]

## Sheet: Fig. S1B Surface to Total Ratio
Vector Control	Commd3 KO	Commd3 KO + Rescue	Ccdc93 KO	Vps35l KO	Commd3 O.E.
1.19	1.14332	1.25	2.01772	1.16429	2.04444
0.94	1.0306	1.37363	2.15551	1.31429	1.94444
0.87	0.950081	1.16758	2.06693	1.26429	1.96667

## Sheet: ANOVA
ANOVA summary
F	65.52
P value	<0.0001
P value summary	****
Significant diff. among means (P < 0.05)?	Yes
R squared	0.9647
Brown-Forsythe test
F (DFn, DFd)	0.3916 (5, 12)
P value	0.8453
P value summary	ns
Are SDs significantly different (P < 0.05)?	No
Bartlett's test
Bartlett's statistic (corrected)
P value
P value summary
Are SDs significantly different (P < 0.05)?
ANOVA table	SS	DF	MS	F (DFn, DFd)	P value
Treatment (between columns)	3.382	5	0.6765	F (5, 12) = 65.52	P<0.0001
Residual (within columns)	0.1239	12	0.01032
Total	3.506	17
Data summary
Number of treatments (columns)	6
Number of values (total)	18

## Sheet: Dunnetts
Number of families	1
Number of comparisons per family	5
Alpha	0.05
Dunnett's multiple comparisons test	Mean Diff.	95.00% CI of diff.	Below threshold?	Summary	Adjusted P Value	A-?
Vector Control vs. Commd3 KO	-0.04133	-0.2820 to 0.1994	No	ns	0.9806	B	Commd3 KO
Vector Control vs. Commd3 KO + Rescue	-0.2637	-0.5044 to -0.02304	Yes	*	0.0306	C	Commd3 KO + Rescue
Vector Control vs. Ccdc93 KO	-1.08	-1.321 to -0.8394	Yes	****	<0.0001	D	Ccdc93 KO
Vector Control vs. Vps35l KO	-0.2476	-0.4883 to -0.006922	Yes	*	0.0432	E	Vps35l KO
Vector Control vs. Commd3 KO	-0.9852	-1.226 to -0.7445	Yes	****	<0.0001	F	Commd3 O.E.
Test details	Mean 1	Mean 2	Mean Diff.	SE of diff.	n1	n2	q	DF
Vector Control vs. Commd3 KO	1	1.041	-0.04133	0.08296	3	3	0.4982	12
Vector Control vs. Commd3 KO + Rescue	1	1.264	-0.2637	0.08296	3	3	3.179	12
Vector Control vs. Ccdc93 KO	1	2.08	-1.08	0.08296	3	3	13.02	12
Vector Control vs. Vps35l KO	1	1.248	-0.2476	0.08296	3	3	2.985	12
Vector Control vs. Overexpression	1	1.985	-0.9852	0.08296	3	3	11.88	12
