# Supplementary material for: A Commander-independent function of COMMD3 in endosomal trafficking
Source: eLife. 2025 Aug 21;14:RP105264. doi: 10.7554/eLife.105264 (PMC12370252; doi:10.7554/eLife.105264)
Supplement: Figure 4—source data 1. [file elife-105264-fig4-data1.xlsx]

## Sheet: Fig. 4A ITGA6
Vector Control	Commd3 KO	Commd1 KO	Commd5 KO
0.986301	0.821918	0.79726	0.803836
1.01096	0.789041	0.76274	0.752055
1.00274	0.788219	0.767671	0.788219

## Sheet: ANOVA
ANOVA summary
F	87.95
P value	<0.0001
P value summary	****
Significant diff. among means (P < 0.05)?	Yes
R squared	0.9706
Brown-Forsythe test
F (DFn, DFd)	0.1712 (3, 8)
P value	0.9128
P value summary	ns
Are SDs significantly different (P < 0.05)?	No
Bartlett's test
Bartlett's statistic (corrected)
P value
P value summary
Are SDs significantly different (P < 0.05)?
ANOVA table	SS	DF	MS	F (DFn, DFd)	P value
Treatment (between columns)	0.1043	3	0.03477	F (3, 8) = 87.95	P<0.0001
Residual (within columns)	0.003162	8	0.0003953
Total	0.1075	11
Data summary
Number of treatments (columns)	4
Number of values (total)	12

## Sheet: Dunnetts
Number of families	1
Number of comparisons per family	3
Alpha	0.05
Dunnett's multiple comparisons test	Mean Diff.	95.00% CI of diff.	Below threshold?	Summary	Adjusted P Value	A-?
Vector Control vs. Commd3 KO	0.2003	0.1535 to 0.2470	Yes	****	<0.0001	B	Commd3 KO
Vector Control vs. Commd1 KO	0.2241	0.1774 to 0.2709	Yes	****	<0.0001	C	Commd1 KO
Vector Control vs. Commd5 KO	0.2186	0.1719 to 0.2654	Yes	****	<0.0001	D	Commd5 KO
Test details	Mean 1	Mean 2	Mean Diff.	SE of diff.	n1	n2	q	DF
Vector Control vs. Commd3 KO	1	0.7997	0.2003	0.01623	3	3	12.34	8
Vector Control vs. Commd1 KO	1	0.7759	0.2241	0.01623	3	3	13.81	8
Vector Control vs. Commd5 KO	1	0.7814	0.2186	0.01623	3	3	13.47	8
