# Supplementary material for: A Commander-independent function of COMMD3 in endosomal trafficking
Source: eLife. 2025 Aug 21;14:RP105264. doi: 10.7554/eLife.105264 (PMC12370252; doi:10.7554/eLife.105264)
Supplement: Figure 4—source data 2. [file elife-105264-fig4-data2.xlsx]

## Sheet: Fig. 4B GLUT-SPR
Vector Control	Commd3 KO	Commd1 KO	Commd5 KO
0.987803	0.466998	1.13933	0.89522
1.02801	0.457014	1.13862	0.92269
0.984184	0.467287	1.21526	0.97147
1.02298	0.545078	1.1484	0.794711
0.971901	0.570763	1.17547	0.776654
1.00512	0.645863	1.10022	0.794826

## Sheet: ANOVA
ANOVA summary
F	120.1
P value	<0.0001
P value summary	****
Significant diff. among means (P < 0.05)?	Yes
R squared	0.9474
Brown-Forsythe test
F (DFn, DFd)	4.743 (3, 20)
P value	0.0117
P value summary	*
Are SDs significantly different (P < 0.05)?	Yes
Bartlett's test
Bartlett's statistic (corrected)	8.031
P value	0.0454
P value summary	*
Are SDs significantly different (P < 0.05)?	Yes
ANOVA table	SS	DF	MS	F (DFn, DFd)	P value
Treatment (between columns)	1.289	3	0.4298	F (3, 20) = 120.1	P<0.0001
Residual (within columns)	0.07158	20	0.003579
Total	1.361	23
Data summary
Number of treatments (columns)	4
Number of values (total)	24

## Sheet: Dunnetts
Number of families	1
Number of comparisons per family	3
Alpha	0.05
Dunnett's multiple comparisons test	Mean Diff.	95.00% CI of diff.	Below threshold?	Summary	Adjusted P Value	A-?
Vector Control vs. Commd3 KO	0.4745	0.3867 to 0.5623	Yes	****	<0.0001	B	Commd3 KO
Vector Control vs. Commd1 KO	-0.1529	-0.2406 to -0.06513	Yes	***	0.0007	C	Commd1 KO
Vector Control vs. Commd5 KO	0.1407	0.05299 to 0.2285	Yes	**	0.0016	D	Commd5 KO
Test details	Mean 1	Mean 2	Mean Diff.	SE of diff.	n1	n2	q	DF
Vector Control vs. Commd3 KO	1	0.5255	0.4745	0.03454	6	6	13.74	20
Vector Control vs. Commd1 KO	1	1.153	-0.1529	0.03454	6	6	4.426	20
Vector Control vs. Commd5 KO	1	0.8593	0.1407	0.03454	6	6	4.075	20
