# Supplementary material for: A Commander-independent function of COMMD3 in endosomal trafficking
Source: eLife. 2025 Aug 21;14:RP105264. doi: 10.7554/eLife.105264 (PMC12370252; doi:10.7554/eLife.105264)
Supplement: Figure 4—source data 3. [file elife-105264-fig4-data3.xlsx]

## Sheet: Fig. 4C TfR
Vector Control	Commd3 KO	Commd1 KO	Commd5 KO
1.00071	0.737809	0.718728	1.10247
0.994346	0.667845	0.678445	1.00495
1.00495	0.682686	0.678445	1.07279
0.964454	0.384213	0.684527	0.487716
1.02561	0.418714	0.741767	0.478306
1.00993	0.411657	0.657867	0.480659
0.947526	0.327836	1.65317	1.4033
0.991504	0.333833	1.73313	1.51324
1.04148	0.323838	1.73513	1.46727
1.01949	0.331834	1.5912	1.3993

## Sheet: ANOVA
ANOVA summary
F	7.319
P value	0.0006
P value summary	***
Significant diff. among means (P < 0.05)?	Yes
R squared	0.3789
Brown-Forsythe test
F (DFn, DFd)	4.405 (3, 36)
P value	0.0097
P value summary	**
Are SDs significantly different (P < 0.05)?	Yes
Bartlett's test
Bartlett's statistic (corrected)	45.01
P value	<0.0001
P value summary	****
Are SDs significantly different (P < 0.05)?	Yes
ANOVA table	SS	DF	MS	F (DFn, DFd)	P value
Treatment (between columns)	2.567	3	0.8558	F (3, 36) = 7.319	P=0.0006
Residual (within columns)	4.209	36	0.1169
Total	6.777	39
Data summary
Number of treatments (columns)	4
Number of values (total)	40

## Sheet: Dunnetts
Number of families	1
Number of comparisons per family	3
Alpha	0.05
Dunnett's multiple comparisons test	Mean Diff.	95.00% CI of diff.	Below threshold?	Summary	Adjusted P Value	A-?
VC vs. Commd3 KO	0.538	0.1630 to 0.9130	Yes	**	0.0034	B	Commd3 KO
VC vs. Commd1 KO	-0.08724	-0.4623 to 0.2878	No	ns	0.8938	C	Commd1 KO
VC vs. Commd5 KO	-0.041	-0.4160 to 0.3340	No	ns	0.9867	D	Commd5 KO
Test details	Mean 1	Mean 2	Mean Diff.	SE of diff.	n1	n2	q	DF
VC vs. Commd3 KO	1	0.462	0.538	0.1529	10	10	3.518	36
VC vs. Commd1 KO	1	1.087	-0.08724	0.1529	10	10	0.5705	36
VC vs. Commd5 KO	1	1.041	-0.041	0.1529	10	10	0.2681	36
