# Supplementary material for: A Commander-independent function of COMMD3 in endosomal trafficking
Source: eLife. 2025 Aug 21;14:RP105264. doi: 10.7554/eLife.105264 (PMC12370252; doi:10.7554/eLife.105264)
Supplement: Figure 4—source data 4. [file elife-105264-fig4-data4.xlsx]

## Sheet: Fig. 4D LAMP1
Vector Control	Commd3 KO	Commd1 KO	Commd5 KO
1.03357	0.45265	0.826855	0.742049
0.996466	0.405477	0.821555	0.768551
0.969965	0.390106	0.810954	0.742049

## Sheet: ANOVA
ANOVA summary
F	300.2
P value	<0.0001
P value summary	****
Significant diff. among means (P < 0.05)?	Yes
R squared	0.9912
Brown-Forsythe test
F (DFn, DFd)	0.6669 (3, 8)
P value	0.5956
P value summary	ns
Are SDs significantly different (P < 0.05)?	No
Bartlett's test
Bartlett's statistic (corrected)
P value
P value summary
Are SDs significantly different (P < 0.05)?
ANOVA table	SS	DF	MS	F (DFn, DFd)	P value
Treatment (between columns)	0.5365	3	0.1788	F (3, 8) = 300.2	P<0.0001
Residual (within columns)	0.004765	8	0.0005957
Total	0.5413	11
Data summary
Number of treatments (columns)	4
Number of values (total)	12

## Sheet: Dunnetts
Number of families	1
Number of comparisons per family	3
Alpha	0.05
Dunnett's multiple comparisons test	Mean Diff.	95.00% CI of diff.	Below threshold?	Summary	Adjusted P Value	A-?
Vector Control vs. Commd3 KO	0.5839	0.5265 to 0.6413	Yes	****	<0.0001	B	Commd3 KO
Vector Control vs. Commd1 KO	0.1802	0.1228 to 0.2376	Yes	****	<0.0001	C	Commd1 KO
Vector Control vs. Commd5 KO	0.2491	0.1917 to 0.3065	Yes	****	<0.0001	D	Commd5 KO
Test details	Mean 1	Mean 2	Mean Diff.	SE of diff.	n1	n2	q	DF
Vector Control vs. Commd3 KO	1	0.4161	0.5839	0.01993	3	3	29.3	8
Vector Control vs. Commd1 KO	1	0.8198	0.1802	0.01993	3	3	9.043	8
Vector Control vs. Commd5 KO	1	0.7509	0.2491	0.01993	3	3	12.5	8
