# Supplementary material for: A Commander-independent function of COMMD3 in endosomal trafficking
Source: eLife. 2025 Aug 21;14:RP105264. doi: 10.7554/eLife.105264 (PMC12370252; doi:10.7554/eLife.105264)
Supplement: Figure 5—figure supplement 1—source data 1. [file elife-105264-fig5-figsupp1-data1.xlsx]

## Sheet: Fig. S2A Norm. Total Commd3
Vector Control	Commd3 KO	Commd3 KO + Rescue	Ccdc93 KO	Vps35l KO
1.01384	0.340713	1.69337	1.85374	1.68393
0.993	0.403	2.056	1.369	2.0765
1	0.234	1.891	1.64	2.527

## Sheet: t test
Unpaired t test	Vector Control vs. Commd3 KO	Vector Control vs. Commd3 KO + Rescue	Vector Control vs. Ccdc93 KO	Vector Control vs. Vps35l KO
P value	0.0002	0.0011	0.0116	0.0109
P value summary	***	*	*	*
Significantly different (P < 0.05)?	Yes	Yes	Yes	Yes
One- or two-tailed P value?	Two-tailed	Two-tailed	Two-tailed	Two-tailed
t, df	t=13.60, df=4	t=8.360, df=4	t=4.406, df=4	t=4.488, df=4
How big is the difference?
Mean of column A	1.002	1.002	1.002	1.002
Mean of column E	0.3259	1.88	1.621	2.096
Difference between means (E - A) ± SEM	-0.6764 ± 0.04972	0.8778 ± 0.1050	0.6186 ± 0.1404	1.094 ± 0.2436
95% confidence interval	-0.8144 to -0.5383	0.5863 to 1.169	0.2288 to 1.008	0.4171 to 1.770
R squared (eta squared)	0.9788	0.9459	0.8292	0.8343
F test to compare variances
F, DFn, Dfd	64.93, 2, 2	293.0, 2, 2	524.6, 2, 2	1582, 2, 2
P value	0.0303	0.0068	0.0038	0.0013
P value summary	*	**	**	**
Significantly different (P < 0.05)?	Yes	Yes	Yes	Yes
Data analyzed
Sample size, column A	3	3	3	3
Sample size, column E	3	3	3	3
