# Supplementary material for: A Commander-independent function of COMMD3 in endosomal trafficking
Source: eLife. 2025 Aug 21;14:RP105264. doi: 10.7554/eLife.105264 (PMC12370252; doi:10.7554/eLife.105264)
Supplement: Figure 5—source data 3. [file elife-105264-fig5-data3.xlsx]

## Sheet: Fig. 5B TfR
Vector Control	Commd3 KO	Ccdc93 KO	Commd3 KO + Rescue	Vps35l KO
1.19	0.71	2.05	0.91	1.63
0.94	0.64	2.19	1	1.84
0.87	0.59	2.1	0.85	1.77

## Sheet: ANOVA
ANOVA summary
F	105.4
P value	<0.0001
P value summary	****
Significant diff. among means (P < 0.05)?	Yes
R squared	0.9768
Brown-Forsythe test
F (DFn, DFd)	0.4061 (4, 10)
P value	0.8004
P value summary	ns
Are SDs significantly different (P < 0.05)?	No
Bartlett's test
Bartlett's statistic (corrected)
P value
P value summary
Are SDs significantly different (P < 0.05)?
ANOVA table	SS	DF	MS	F (DFn, DFd)	P value
Treatment (between columns)	4.564	4	1.141	F (4, 10) = 105.4	P<0.0001
Residual (within columns)	0.1082	10	0.01082
Total	4.672	14
Data summary
Number of treatments (columns)	5
Number of values (total)	15

## Sheet: Dunnetts
Number of families	1
Number of comparisons per family	4
Alpha	0.05
Dunnett's multiple comparisons test	Mean Diff.	95.00% CI of diff.	Below threshold?	Summary	Adjusted P Value	A-?
Vector Control vs. Commd3 KO	0.3533	0.1078 to 0.5988	Yes	**	0.0065	B	Commd3 KO
Vector Control vs. Ccdc93 KO	-1.113	-1.359 to -0.8678	Yes	****	<0.0001	C	Ccdc93 KO
Vector Control vs. Commd3 KO + Rescue	0.08	-0.1655 to 0.3255	No	ns	0.755	D	Commd3 KO + Rescue
Vector Control vs. Vps35l KO	-0.7467	-0.9922 to -0.5012	Yes	****	<0.0001	E	Vps35l KO
Test details	Mean 1	Mean 2	Mean Diff.	SE of diff.	n1	n2	q	DF
Vector Control vs. Commd3 KO	1	0.6467	0.3533	0.08493	3	3	4.16	10
Vector Control vs. Ccdc93 KO	1	2.113	-1.113	0.08493	3	3	13.11	10
Vector Control vs. Commd3 KO + Rescue	1	0.92	0.08	0.08493	3	3	0.9419	10
Vector Control vs. Vps35l KO	1	1.747	-0.7467	0.08493	3	3	8.791	10
