# Supplementary material for: A Commander-independent function of COMMD3 in endosomal trafficking
Source: eLife. 2025 Aug 21;14:RP105264. doi: 10.7554/eLife.105264 (PMC12370252; doi:10.7554/eLife.105264)
Supplement: Figure 5—source data 4. [file elife-105264-fig5-data4.xlsx]

## Sheet: Fig. 5C TfR
Vector Control	Commd3 KO	Ccdc93 KO	Commd3 KO + Ccdc93 KO
0.98	0.77	1.38	0.8
1	0.78	1.42	0.82
1.05	0.77	1.5	0.84
0.97	0.77	1.27	0.79

## Sheet: ANOVA
ANOVA summary
F	117.4
P value	<0.0001
P value summary	****
Significant diff. among means (P < 0.05)?	Yes
R squared	0.967
Brown-Forsythe test
F (DFn, DFd)	3.234 (3, 12)
P value	0.0607
P value summary	ns
Are SDs significantly different (P < 0.05)?	No
Bartlett's test
Bartlett's statistic (corrected)	15.73
P value	0.0013
P value summary	**
Are SDs significantly different (P < 0.05)?	Yes
ANOVA table	SS	DF	MS	F (DFn, DFd)	P value
Treatment (between columns)	0.9634	3	0.3211	F (3, 12) = 117.4	P<0.0001
Residual (within columns)	0.03283	12	0.002735
Total	0.9962	15
Data summary
Number of treatments (columns)	4
Number of values (total)	16

## Sheet: Šídáks
Number of families	1
Number of comparisons per family	4
Alpha	0.05
Šídák's multiple comparisons test	Mean Diff.	95.00% CI of diff.	Below threshold?	Summary	Adjusted P Value
Vector Control vs. Commd3KO	0.2275	0.1194 to 0.3356	Yes	***	0.0002	A-B
Vector Control vs. Ccdc93KO	-0.3925	-0.5006 to -0.2844	Yes	****	<0.0001	A-C
Vector Control vs. Commd3KO + Ccdc93 KO	0.1875	0.07936 to 0.2956	Yes	**	0.0011	A-D
Commd3KO vs. Commd3KO + Ccdc93 KO	-0.04	-0.1481 to 0.06814	No	ns	0.7608	B-D
Test details	Mean 1	Mean 2	Mean Diff.	SE of diff.	n1	n2	t	DF
Vector Control vs. Commd3KO	1	0.7725	0.2275	0.03698	4	4	6.152	12
Vector Control vs. Ccdc93KO	1	1.393	-0.3925	0.03698	4	4	10.61	12
Vector Control vs. Commd3KO + Ccdc93 KO	1	0.8125	0.1875	0.03698	4	4	5.07	12
Commd3KO vs. Commd3KO + Ccdc93 KO	0.7725	0.8125	-0.04	0.03698	4	4	1.082	12
