# Supplementary material for: A Commander-independent function of COMMD3 in endosomal trafficking
Source: eLife. 2025 Aug 21;14:RP105264. doi: 10.7554/eLife.105264 (PMC12370252; doi:10.7554/eLife.105264)
Supplement: Figure 5—source data 5. [file elife-105264-fig5-data5.xlsx]

## Sheet: Fig. 5D TfR
Vector Control	Commd3 KO	KO + Rescue	Ccdc93 KO	Vps35l KO	VC + Rescue
1.19	0.71	0.91	2.05	1.63	1.84
0.94	0.64	1	2.19	1.84	1.75
0.87	0.59	0.85	2.1	1.77	1.77

## Sheet: ANOVA
ANOVA summary
F	110.6
P value	<0.0001
P value summary	****
Significant diff. among means (P < 0.05)?	Yes
R squared	0.9788
Brown-Forsythe test
F (DFn, DFd)	0.4851 (5, 12)
P value	0.7811
P value summary	ns
Are SDs significantly different (P < 0.05)?	No
Bartlett's test
Bartlett's statistic (corrected)
P value
P value summary
Are SDs significantly different (P < 0.05)?
ANOVA table	SS	DF	MS	F (DFn, DFd)	P value
Treatment (between columns)	5.192	5	1.038	F (5, 12) = 110.6	P<0.0001
Residual (within columns)	0.1127	12	0.009389
Total	5.305	17
Data summary
Number of treatments (columns)	6
Number of values (total)	18

## Sheet: Dunnetts
Number of families	1
Number of comparisons per family	5
Alpha	0.05
Dunnett's multiple comparisons test	Mean Diff.	95.00% CI of diff.	Below threshold?	Summary	Adjusted P Value	A-?
Vector Control vs. Commd3 KO	0.3533	0.1238 to 0.5829	Yes	**	0.0032	B	Commd3 KO
Vector Control vs. KO + Rescue	0.08	-0.1495 to 0.3095	No	ns	0.7678	C	KO + Rescue
Vector Control vs. mCcdc93 KO	-1.113	-1.343 to -0.8838	Yes	****	<0.0001	D	mCcdc93 KO
Vector Control vs. mVps35l KO	-0.7467	-0.9762 to -0.5171	Yes	****	<0.0001	E	mVps35l KO
Vector Control vs. VC + Rescue	-0.7867	-1.016 to -0.5571	Yes	****	<0.0001	F	VC + Rescue
Test details	Mean 1	Mean 2	Mean Diff.	SE of diff.	n1	n2	q	DF
Vector Control vs. Commd3 KO	1	0.6467	0.3533	0.07912	3	3	4.466	12
Vector Control vs. KO + Rescue	1	0.92	0.08	0.07912	3	3	1.011	12
Vector Control vs. mCcdc93 KO	1	2.113	-1.113	0.07912	3	3	14.07	12
Vector Control vs. mVps35l KO	1	1.747	-0.7467	0.07912	3	3	9.438	12
Vector Control vs. VC + Rescue	1	1.787	-0.7867	0.07912	3	3	9.943	12
