# Supplementary material for: A Commander-independent function of COMMD3 in endosomal trafficking
Source: eLife. 2025 Aug 21;14:RP105264. doi: 10.7554/eLife.105264 (PMC12370252; doi:10.7554/eLife.105264)
Supplement: Figure 6—figure supplement 1—source data 1. [file elife-105264-fig6-figsupp1-data1.xlsx]

## Sheet: Fig. S3A TfR
Vector Control	Commd3 KO	KO + NTD mCherry	KO + mCherry CTD
1.0008	0.71463	0.95801	0.856914
1.02594	0.716769	0.971918	0.829634
1.01043	0.687884	0.949987	0.826959
0.962824	0.669698	0.872961	0.765445

## Sheet: ANOVA
ANOVA summary
F	61.02
P value	<0.0001
P value summary	****
Significant diff. among means (P < 0.05)?	Yes
R squared	0.9385
Brown-Forsythe test
F (DFn, DFd)	0.1058 (3, 12)
P value	0.9551
P value summary	ns
Are SDs significantly different (P < 0.05)?	No
Bartlett's test
Bartlett's statistic (corrected)	1.483
P value	0.6861
P value summary	ns
Are SDs significantly different (P < 0.05)?	No
ANOVA table	SS	DF	MS	F (DFn, DFd)	P value
Treatment (between columns)	0.2151	3	0.07169	F (3, 12) = 61.02	P<0.0001
Residual (within columns)	0.0141	12	0.001175
Total	0.2292	15
Data summary
Number of treatments (columns)	4
Number of values (total)	16

## Sheet: Dunnetts
Number of families	1
Number of comparisons per family	3
Alpha	0.05
Dunnett's multiple comparisons test	Mean Diff.	95.00% CI of diff.	Below threshold?	Summary	Adjusted P Value	A-?
Vector Control vs. Commd3 KO	0.3028	0.2377 to 0.3678	Yes	****	<0.0001	B	Commd3 KO
Vector Control vs. KO + NTD mCherry	0.06178	-0.003246 to 0.1268	No	ns	0.0633	C	KO + NTD mCherry
Vector Control vs. KO + mCherry CTD	0.1803	0.1152 to 0.2453	Yes	****	<0.0001	D	KO + mCherry CTD
Test details	Mean 1	Mean 2	Mean Diff.	SE of diff.	n1	n2	q	DF
Vector Control vs. Commd3 KO	1	0.6972	0.3028	0.02424	4	4	12.49	12
Vector Control vs. KO + NTD mCherry	1	0.9382	0.06178	0.02424	4	4	2.549	12
Vector Control vs. KO + mCherry CTD	1	0.8197	0.1803	0.02424	4	4	7.437	12
