# Supplementary material for: A Commander-independent function of COMMD3 in endosomal trafficking
Source: eLife. 2025 Aug 21;14:RP105264. doi: 10.7554/eLife.105264 (PMC12370252; doi:10.7554/eLife.105264)
Supplement: Figure 6—source data 1. [file elife-105264-fig6-data1.xlsx]

## Sheet: Fig. 6B TfR
Vector Control	Commd3 KO	NTD Rescue
0.952301	0.671169	1.08147
0.976361	0.629379	1.16125
1.07134	0.677501	1.14479

## Sheet: ANOVA
ANOVA summary
F	82.59
P value	<0.0001
P value summary	****
Significant diff. among means (P < 0.05)?	Yes
R squared	0.9649
Brown-Forsythe test
F (DFn, DFd)	0.3136 (2, 6)
P value	0.7421
P value summary	ns
Are SDs significantly different (P < 0.05)?	No
Bartlett's test
Bartlett's statistic (corrected)
P value
P value summary
Are SDs significantly different (P < 0.05)?
ANOVA table	SS	DF	MS	F (DFn, DFd)	P value
Treatment (between columns)	0.3535	2	0.1767	F (2, 6) = 82.59	P<0.0001
Residual (within columns)	0.01284	6	0.00214
Total	0.3663	8
Data summary
Number of treatments (columns)	3
Number of values (total)	9

## Sheet: Dunnetts
Number of families	1
Number of comparisons per family	2
Alpha	0.05
Dunnett's multiple comparisons test	Mean Diff.	95.00% CI of diff.	Below threshold?	Summary	Adjusted P Value	A-?
Vector Control vs. Commd3 KO	0.3407	0.2325 to 0.4488	Yes	***	0.0002	B	Commd3 KO
Vector Control vs. NTD Rescue	-0.1292	-0.2373 to -0.02103	Yes	*	0.025	C	NTD Rescue
Test details	Mean 1	Mean 2	Mean Diff.	SE of diff.	n1	n2	q	DF
Vector Control vs. Commd3 KO	1	0.6593	0.3407	0.03777	3	3	9.019	6
Vector Control vs. NTD Rescue	1	1.129	-0.1292	0.03777	3	3	3.42	6
