# Supplementary material for: A Commander-independent function of COMMD3 in endosomal trafficking
Source: eLife. 2025 Aug 21;14:RP105264. doi: 10.7554/eLife.105264 (PMC12370252; doi:10.7554/eLife.105264)
Supplement: Figure 7—source data 1. [file elife-105264-fig7-data1.xlsx]

## Sheet: Fig. 7B Pearson Coloc.
NTD-ARF1 Coloc.	90º Rotation
0.25	-0.06
0.27	0.01
0.27	0.04
0.16	0.04
0.47	0.02
0.356	0.023
0.274	0.006

## Sheet: t test
Unpaired t test
P value	<0.0001
P value summary	****
Significantly different (P < 0.05)?	Yes
One- or two-tailed P value?	Two-tailed
t, df	t=7.257, df=12
How big is the difference?
Mean of column A	0.2929
Mean of column B	0.01129
Difference between means (B - A) ± SEM	-0.2816 ± 0.03880
95% confidence interval	-0.3661 to -0.1970
R squared (eta squared)	0.8144
F test to compare variances
F, DFn, Dfd	8.067, 6, 6
P value	0.0226
P value summary	*
Significantly different (P < 0.05)?	Yes
Data analyzed
Sample size, column A	7
Sample size, column B	7
