# Supplementary material for: A Commander-independent function of COMMD3 in endosomal trafficking
Source: eLife. 2025 Aug 21;14:RP105264. doi: 10.7554/eLife.105264 (PMC12370252; doi:10.7554/eLife.105264)
Supplement: Figure 7—source data 4. [file elife-105264-fig7-data4.xlsx]

## Sheet: Fig. 7E TfR
Vector Control	Commd3 KO	KO + Rescue	KO + Arf1
0.992413	0.551973	0.979894	0.883156
0.944613	0.499621	0.986722	0.983308
1.06297	0.654401	1.00493	0.920713

## Sheet: ANOVA
ANOVA summary
F	40.32
P value	<0.0001
P value summary	****
Significant diff. among means (P < 0.05)?	Yes
R squared	0.938
Brown-Forsythe test
F (DFn, DFd)	0.7965 (3, 8)
P value	0.5295
P value summary	ns
Are SDs significantly different (P < 0.05)?	No
Bartlett's test
Bartlett's statistic (corrected)
P value
P value summary
Are SDs significantly different (P < 0.05)?
ANOVA table	SS	DF	MS	F (DFn, DFd)	P value
Treatment (between columns)	0.3771	3	0.1257	F (3, 8) = 40.32	P<0.0001
Residual (within columns)	0.02494	8	0.003118
Total	0.402	11
Data summary
Number of treatments (columns)	4
Number of values (total)	12

## Sheet: Dunnetts
Number of families	1
Number of comparisons per family	3
Alpha	0.05
Dunnett's multiple comparisons test	Mean Diff.	95.00% CI of diff.	Below threshold?	Summary	Adjusted P Value	A-?
Vector Control vs. Commd3 KO	0.4313	0.3000 to 0.5626	Yes	****	<0.0001	B	Commd3 KO
Vector Control vs. KO + Rescue	0.009484	-0.1218 to 0.1408	No	ns	0.9933	C	KO + Rescue
Vector Control vs. KO + Arf1	0.07094	-0.06035 to 0.2022	No	ns	0.3374	D	KO + Arf1
Test details	Mean 1	Mean 2	Mean Diff.	SE of diff.	n1	n2	q	DF
Vector Control vs. Commd3 KO	1	0.5687	0.4313	0.04559	3	3	9.461	8
Vector Control vs. KO + Rescue	1	0.9905	0.009484	0.04559	3	3	0.208	8
Vector Control vs. KO + Arf1	1	0.9291	0.07094	0.04559	3	3	1.556	8
