# Supplementary material for: A Commander-independent function of COMMD3 in endosomal trafficking
Source: eLife. 2025 Aug 21;14:RP105264. doi: 10.7554/eLife.105264 (PMC12370252; doi:10.7554/eLife.105264)
Supplement: Figure 8—source data 1. [file elife-105264-fig8-data1.xlsx]

## Sheet: Fig. 8D Normalized MFI
NTD	Mut 1	Mut 2	Mut 3 (NTD*)	Mut4
0.904118	1.46097	0.869857	1.44952	0.976702
1.02782	1.15339	0.943071	1.48502	1.01575
1.27581	2.04606	0.97741	1.26652	1.05918
1.09888	0.637135	1.81324	1.16158	1.17855
0.854256	0.75557	1.45258	1.20676	1.04425
0.819864	0.656569	1.74381	0.947547	1.07278
0.8587	1.05747		1.17717	0.677165
0.995407	1.3421		1.31837	0.83244
1.16515	1.52022		1.37196	0.774262
	1.26826		1.14676
	1.31852		1.08842
	1.29173		0.883542
	1.28492
	0.683708
	0.847214

## Sheet: ANOVA
ANOVA summary
F	2.018
P value	0.1076
P value summary	ns
Significant diff. among means (P < 0.05)?	No
R squared	0.1493
Brown-Forsythe test
F (DFn, DFd)	3.753 (4, 46)
P value	0.01
P value summary	*
Are SDs significantly different (P < 0.05)?	Yes
Bartlett's test
Bartlett's statistic (corrected)	15.57
P value	0.0037
P value summary	**
Are SDs significantly different (P < 0.05)?	Yes
ANOVA table	SS	DF	MS	F (DFn, DFd)	P value
Treatment (between columns)	0.6694	4	0.1673	F (4, 46) = 2.018	P=0.1076
Residual (within columns)	3.814	46	0.08291
Total	4.483	50
Data summary
Number of treatments (columns)	5
Number of values (total)	51

## Sheet: Dunnetts
Number of families	1
Number of comparisons per family	4
Alpha	0.05
Dunnett's multiple comparisons test	Mean Diff.	95.00% CI of diff.	Below threshold?	Summary	Adjusted P Value	A-?
NTD vs. Mut 1	-0.1549	-0.4612 to 0.1514	No	ns	0.5136	B	Mut 1
NTD vs. Mut 2	-0.3	-0.6829 to 0.08289	No	ns	0.162	C	Mut 2
NTD vs. Mut 3 (NTD*)	-0.2086	-0.5289 to 0.1117	No	ns	0.2967	D	Mut 3 (NTD*)
NTD vs. Mut4	0.04099	-0.3015 to 0.3835	No	ns	0.994	E	Mut4
Test details	Mean 1	Mean 2	Mean Diff.	SE of diff.	n1	n2	q	DF
NTD vs. Mut 1	1	1.155	-0.1549	0.1214	9	15	1.276	46
NTD vs. Mut 2	1	1.3	-0.3	0.1518	9	6	1.977	46
NTD vs. Mut 3 (NTD*)	1	1.209	-0.2086	0.127	9	12	1.643	46
NTD vs. Mut4	1	0.959	0.04099	0.1357	9	9	0.302	46
