# Supplementary material for: A Commander-independent function of COMMD3 in endosomal trafficking
Source: eLife. 2025 Aug 21;14:RP105264. doi: 10.7554/eLife.105264 (PMC12370252; doi:10.7554/eLife.105264)
Supplement: Figure 8—source data 2. [file elife-105264-fig8-data2.xlsx]

## Sheet: Fig. 8E TfR
Vector Control	Commd3 KO	NTD	NTD*
0.941227	0.63656	0.811582	0.470614
1.06828	0.570441	1.04883	0.57433
0.990493	0.805099	1.17848	0.55618
1.03342	0.464267	0.584576	0.592288
0.994859	0.412596	0.519794	0.594602
0.971722	0.409512	0.609254	0.582262

## Sheet: ANOVA
ANOVA summary
F	10.86
P value	0.0002
P value summary	***
Significant diff. among means (P < 0.05)?	Yes
R squared	0.6197
Brown-Forsythe test
F (DFn, DFd)	6.089 (3, 20)
P value	0.0041
P value summary	**
Are SDs significantly different (P < 0.05)?	Yes
Bartlett's test
Bartlett's statistic (corrected)	18.33
P value	0.0004
P value summary	***
Are SDs significantly different (P < 0.05)?	Yes
ANOVA table	SS	DF	MS	F (DFn, DFd)	P value
Treatment (between columns)	0.825	3	0.275	F (3, 20) = 10.86	P=0.0002
Residual (within columns)	0.5063	20	0.02531
Total	1.331	23
Data summary
Number of treatments (columns)	4
Number of values (total)	24

## Sheet: Dunnetts
Number of families	1
Number of comparisons per family	3
Alpha	0.05
Dunnett's multiple comparisons test	Mean Diff.	95.00% CI of diff.	Below threshold?	Summary	Adjusted P Value	A-?
Vector Control vs. Commd3 KO	0.4503	0.2169 to 0.6836	Yes	***	0.0002	B	Commd3 KO
Vector Control vs. NTD	0.2079	-0.02545 to 0.4413	No	ns	0.0871	C	NTD
Vector Control vs. NTD*	0.4383	0.2049 to 0.6717	Yes	***	0.0003	D	NTD*
Test details	Mean 1	Mean 2	Mean Diff.	SE of diff.	n1	n2	q	DF
Vector Control vs. Commd3 KO	1	0.5497	0.4503	0.09186	6	6	4.902	20
Vector Control vs. NTD	1	0.7921	0.2079	0.09186	6	6	2.263	20
Vector Control vs. NTD*	1	0.5617	0.4383	0.09186	6	6	4.771	20
