# Supplementary material for: A Commander-independent function of COMMD3 in endosomal trafficking
Source: eLife. 2025 Aug 21;14:RP105264. doi: 10.7554/eLife.105264 (PMC12370252; doi:10.7554/eLife.105264)
Supplement: Figure 8—source data 3. [file elife-105264-fig8-data3.xlsx]

## Sheet: Fig. 8F Normalized Total ARF1
Vector Control	KO	NTD	NTD*
1.02847	0.823925	0.788291	0.225095
0.992857	0.35207	0.917824	0.600587
0.978673	0.34526	0.75146	0.437904

## Sheet: ANOVA
ANOVA summary
F	7.34
P value	0.011
P value summary	*
Significant diff. among means (P < 0.05)?	Yes
R squared	0.7335
Brown-Forsythe test
F (DFn, DFd)	0.5604 (3, 8)
P value	0.656
P value summary	ns
Are SDs significantly different (P < 0.05)?	No
Bartlett's test
Bartlett's statistic (corrected)
P value
P value summary
Are SDs significantly different (P < 0.05)?
ANOVA table	SS	DF	MS	F (DFn, DFd)	P value
Treatment (between columns)	0.6554	3	0.2185	F (3, 8) = 7.340	P=0.0110
Residual (within columns)	0.2381	8	0.02976
Total	0.8935	11
Data summary
Number of treatments (columns)	4
Number of values (total)	12

## Sheet: Dunnetts
Number of families	1
Number of comparisons per family	3
Alpha	0.05
Dunnett's multiple comparisons test	Mean Diff.	95.00% CI of diff.	Below threshold?	Summary	Adjusted P Value	A-?
Vector Control vs. KO	0.4929	0.08727 to 0.8986	Yes	*	0.0202	B	KO
Vector Control vs. NTD	0.1808	-0.2248 to 0.5865	No	ns	0.4738	C	NTD
Vector Control vs. NTD*	0.5788	0.1732 to 0.9845	Yes	**	0.0086	D	NTD*
Test details	Mean 1	Mean 2	Mean Diff.	SE of diff.	n1	n2	q	DF
Vector Control vs. KO	1	0.5071	0.4929	0.1409	3	3	3.499	8
Vector Control vs. NTD	1	0.8192	0.1808	0.1409	3	3	1.284	8
Vector Control vs. NTD*	1	0.4212	0.5788	0.1409	3	3	4.109	8
