# Supplementary material for: A Commander-independent function of COMMD3 in endosomal trafficking
Source: eLife. 2025 Aug 21;14:RP105264. doi: 10.7554/eLife.105264 (PMC12370252; doi:10.7554/eLife.105264)
Supplement: Supplementary file 1. [file elife-105264-supp1.xlsx]

## Sheet: Table S1. Interactome (FC)
Supplementary File 1. The interactomes of COMMD3
Protein names	Gene names	Log10(Fold-change) FL	Log10(Fold-change) NTD	Log10(Fold-change) CTD
Keratin, type II cytoskeletal 2 oral	Krt76	7.97912	7.55878	8.46048
Histone H1.1	Hist1h1a	8.43876	7.05869	6.70098
Commd3 (Bait)	Control	6.25076	6.64189	5.98816
Histone H1.5	Hist1h1b	8.06755	6.48635	0
Heterogeneous nuclear ribonucleoprotein A1;Heterogeneous nuclear ribonucleoprotein A1, N-terminally processed	Hnrnpa1	7.25013	6.41579	5.27644
40S ribosomal protein SA	Rpsa	7.00195	6.38037	6.49339
ADP-ribosylation factor 2;ADP-ribosylation factor 1;ADP-ribosylation factor 3;ADP-ribosylation factor 5	Arf2;Arf1;Arf3;Arf5	6.23646	6.36964	0
High mobility group protein B2	Hmgb2	0	6.35058	0
Histone H2A.V;Histone H2A.Z;Histone H2A	H2afv;H2afz	7.12107	6.33151	0
60S ribosomal protein L12	Rpl12	7.0834	6.26076	5.8852
Cytochrome c oxidase subunit 6C	Cox6c	7.4387	6.25897	0
Bone marrow stromal antigen 2	Bst2	7.04922	6.25674	0
Histone H1.4	Hist1h1e	7.92727	6.19742	0
Heterogeneous nuclear ribonucleoprotein U	Hnrnpu	7.61032	6.14179	0
Elongation factor 1-delta	Eef1d	6.13037	6.11873	0
40S ribosomal protein S19	Rps19	7.13644	6.10721	0
NHP2-like protein 1;NHP2-like protein 1, N-terminally processed	Nhp2l1	7.36056	6.1024	0
40S ribosomal protein S20	Rps20	7.48282	6.09426	0
Thymosin beta-10	Tmsb10	0	6.07642	0
Heterogeneous nuclear ribonucleoproteins C1/C2	Hnrnpc	7.5475	6.05138	0
Heterogeneous nuclear ribonucleoprotein A/B	Hnrnpab	7.29653	6.04906	0
40S ribosomal protein S30	Fau	7.61602	6.04419	0
Myosin regulatory light chain 12B;Myosin regulatory light polypeptide 9	Myl12a;Myl12b;Myl9	6.4997	6.02735	0
40S ribosomal protein S15a	Rps15a	6.88562	6.00954	6.48369
Proteolipid protein 2	Plp2	6.63012	5.99674	0
Nucleolin	Ncl	7.54781	5.99242	0
Small nuclear ribonucleoprotein Sm D3	Snrpd3	7.18144	5.98826	0
Cytochrome c oxidase subunit 5B, mitochondrial	Cox5b	6.79548	5.97264	0
Cytochrome c oxidase subunit 7A2, mitochondrial	Cox7a2	6.90818	5.96759	0
Voltage-dependent anion-selective channel protein 3	Vdac3	7.35428	5.94961	0
Nucleoside diphosphate kinase;Nucleoside diphosphate kinase A	Nme1	5.06085	5.93936	5.97088
Cytoskeleton-associated protein 4	Ckap4	7.06874	5.91385	0
Lamina-associated polypeptide 2, isoforms beta/delta/epsilon/gamma;Lamina-associated polypeptide 2, isoforms alpha/zeta	Tmpo	7.04941	5.90174	0
Thy-1 membrane glycoprotein	Thy1	6.42493	5.85539	0
Rho GDP-dissociation inhibitor 1	Arhgdia	0	5.7951	0
Eukaryotic translation initiation factor 5A;Eukaryotic translation initiation factor 5A-1;Eukaryotic translation initiation factor 5A-2	Eif5a;Eif5a2	5.99653	5.78214	0
Hsc70-interacting protein	St13	6.40707	5.77875	0
Cytochrome c oxidase subunit 7C, mitochondrial	Cox7c	6.94969	5.77827	0
Moesin;Radixin;Ezrin	Msn;Rdx;Ezr	6.19187	5.7652	0
Eukaryotic initiation factor 4A-I;Eukaryotic initiation factor 4A-II;Eukaryotic initiation factor 4A-II, N-terminally processed	Eif4a1;Eif4a2	6.3381	5.75188	5.99666
14-3-3 protein epsilon	Ywhae	6.16991	5.74532	5.41644
Cytochrome c oxidase subunit 5A, mitochondrial	Cox5a	6.89188	5.74218	0
60 kDa heat shock protein, mitochondrial	Hspd1	6.29354	5.72314	0
40S ribosomal protein S25	Rps25	7.59733	5.71844	0
Cytochrome c oxidase subunit 4 isoform 1, mitochondrial	Cox4i1	6.99319	5.71707	0
Caprin-1	Caprin1	6.49303	5.65841	0
60S ribosomal protein L23a	Rpl23a	7.51496	5.6512	0
Interferon-induced transmembrane protein 3	Ifitm3	7.34319	5.62902	0
Polypyrimidine tract-binding protein 1	Ptbp1	6.95512	5.60261	0
60S ribosomal protein L30	Rpl30	6.6154	5.59892	0
60S ribosomal protein L7a	Rpl7a	6.73674	5.57429	0
Nucleoside diphosphate kinase B;Nucleoside diphosphate kinase	Nme2;Gm20390	0	5.54664	0
RNA-binding protein 8A	Rbm8a	6.89679	5.53372	0
Plasminogen activator inhibitor 1 RNA-binding protein	Serbp1	6.12898	5.51638	0
D-3-phosphoglycerate dehydrogenase	Phgdh	6.16017	5.5069	5.72151
Collagen alpha-1(I) chain	Col1a1	6.68638	5.49224	0
40S ribosomal protein S5;40S ribosomal protein S5, N-terminally processed	Rps5	6.61991	5.48432	0
Probable ATP-dependent RNA helicase DDX5	Ddx5	6.71281	5.47608	0
Prohibitin	Phb	7.31433	5.47137	0
TAR DNA-binding protein 43	Tardbp	6.98066	5.46785	0
ELAV-like protein 1	Elavl1	7.06599	5.46708	0
Heterogeneous nuclear ribonucleoprotein L	Hnrnpl	6.90563	5.46054	0
4F2 cell-surface antigen heavy chain	Slc3a2	6.31222	5.45643	0
Heterogeneous nuclear ribonucleoprotein F;Heterogeneous nuclear ribonucleoprotein F, N-terminally processed	Hnrnpf	6.61527	5.45396	0
Galectin;Galectin-3	Lgals3	6.21651	5.44038	0
Ran-specific GTPase-activating protein	Ranbp1	5.58651	5.43908	0
40S ribosomal protein S4, X isoform	Rps4x	6.871	5.4374	0
Heterogeneous nuclear ribonucleoprotein M	Hnrnpm	6.95838	5.43347	0
Histone-binding protein RBBP4	Rbbp4	6.36611	5.40525	0
40S ribosomal protein S6	Rps6	6.45367	5.40497	0
Peptidyl-prolyl cis-trans isomerase B	Ppib	5.8395	5.385	0
Vesicle-associated membrane protein-associated protein A;Vesicle-associated membrane protein-associated protein B	Vapa;Vapb	6.03846	5.38007	0
Nuclease-sensitive element-binding protein 1	Ybx1	7.19148	5.36044	0
14-3-3 protein sigma	Sfn	5.39876	5.34177	6.99561
Small nuclear ribonucleoprotein Sm D1	Snrpd1	5.27015	5.3351	5.52989
ATP-dependent RNA helicase DDX39A;Spliceosome RNA helicase Ddx39b	Ddx39a;Ddx39b;Ddx39	6.64721	5.32916	0
Alpha-actinin-1	Actn1	6.23792	5.3281	5.62586
Prohibitin-2	Phb2	7.19184	5.32781	0
Poly(rC)-binding protein 2;Poly(rC)-binding protein 3	Pcbp2;Pcbp3	6.62705	5.30578	0
Sodium/potassium-transporting ATPase subunit alpha-1	Atp1a1	6.74191	5.30168	0
Ribosomal protein;60S ribosomal protein L10a	Rpl10a	7.29451	5.28357	0
Elongation factor 1-gamma	Eef1g	6.3095	5.26774	5.75066
RNA binding motif protein, X-linked-like-1;RNA-binding motif protein, X chromosome;RNA-binding motif protein, X chromosome, N-terminally processed	Rbmxl1;Rbmx	6.90851	5.25101	7.6471
40S ribosomal protein S10	Rps10	6.64358	5.23742	0
THO complex subunit 4;Aly/REF export factor 2	Alyref;Alyref2	6.80209	5.21355	0
Protein disulfide-isomerase A3	Pdia3	6.04568	5.18056	0
Transferrin receptor protein 1	Tfrc	6.71389	5.1747	0
Nascent polypeptide-associated complex subunit alpha;Nascent polypeptide-associated complex subunit alpha, muscle-specific form	Naca	0	5.17243	6.2911
Dolichyl-diphosphooligosaccharide--protein glycosyltransferase subunit 1	Rpn1	6.52776	5.15631	0
Lysosome-associated membrane glycoprotein 1	Lamp1	6.06157	5.12571	5.95823
Heterogeneous nuclear ribonucleoprotein K	Hnrnpk	6.52701	5.02326	0
Desmoplakin	Dsp	6.2481	4.97259	7.76266
Proliferation-associated protein 2G4	Pa2g4	5.62176	4.91516	0
Prolyl 4-hydroxylase subunit alpha-1	P4ha1	6.47741	4.91003	0
AHNAK protein	Ahnak	6.09555	4.86574	5.01974
Transitional endoplasmic reticulum ATPase	Vcp	5.44899	4.75658	0
Lamin-B1	Lmnb1	6.78165	4.72642	0
Desmoglein-1-beta;Desmoglein-1-alpha;Desmoglein-1-gamma	Dsg1b;Dsg1a;Dsg1c	5.80217	4.67919	6.98756
Dolichyl-diphosphooligosaccharide--protein glycosyltransferase 48 kDa subunit	Ddost	6.34764	4.66635	0
Vinculin	Vcl	0	4.64416	0
ATP-dependent RNA helicase A	Dhx9	6.64961	4.47028	0
Stress-induced-phosphoprotein 1	Stip1	5.44557	4.45066	0
Junction plakoglobin	Jup	6.70848	4.41041	7.99715
Clathrin heavy chain;Clathrin heavy chain 1	Cltc	5.01166	4.28726	0
60S ribosomal protein L27	Rpl27	7.80863	0	0
40S ribosomal protein S14	Rps14	7.69676	0	0
Histone H1.0;Histone H1.0, N-terminally processed	H1f0	7.68133	0	0
60S ribosomal protein L22	Rpl22	7.49077	0	0
Non-histone chromosomal protein HMG-14	Hmgn1	7.47425	0	0
40S ribosomal protein S11	Rps11	7.40434	0	0
Histone H1.3	Hist1h1d	7.3807	0	0
Treacle protein	Tcof1	7.21107	0	0
40S ribosomal protein S23	Rps23	7.16673	0	0
Nucleolar RNA helicase 2	Ddx21	7.14928	0	0
Cytochrome c oxidase subunit NDUFA4	Ndufa4	7.14829	0	0
60S ribosomal protein L14	Rpl14	7.11727	0	0
40S ribosomal protein S29	Rps29	7.0774	0	0
60S ribosomal protein L13a	Rpl13a	7.07328	0	0
40S ribosomal protein S7	Rps7	7.06318	0	0
Polymerase I and transcript release factor	Ptrf	7.03989	0	0
ATP synthase subunit gamma;ATP synthase subunit gamma, mitochondrial	Atp5c1	7.03499	0	0
40S ribosomal protein S9	Rps9	7.03387	0	0
RNA-binding protein Raly	Raly	7.02784	0	0
60S ribosomal protein L26	Rpl26	7.02666	0	0
Caveolin-1;Caveolin	Cav1	6.98571	0	5.36448
60S ribosomal protein L4	Rpl4	6.9842	0	0
40S ribosomal protein S18	Gm10260;Rps18	6.98266	0	0
40S ribosomal protein S13	Rps13	6.95476	0	0
Myb-binding protein 1A	Mybbp1a	6.95308	0	0
ATP synthase subunit e, mitochondrial	Atp5i	6.95113	0	0
60S ribosomal protein L23	Rpl23	6.91487	0	0
60S ribosomal protein L6	Rpl6	6.90965	0	0
ATP synthase subunit delta, mitochondrial	Atp5d	6.90869	0	0
40S ribosomal protein S3a	Rps3a	6.90844	0	0
Serine/arginine-rich splicing factor 7	Srsf7	6.874	0	0
60S ribosomal protein L9	Rpl9	6.86691	0	0
Cytochrome c oxidase subunit 6A, mitochondrial;Cytochrome c oxidase subunit 6A1, mitochondrial	Cox6a1	6.86568	0	0
60S ribosomal protein L29	Gm3550;Rpl29	6.85325	0	0
High mobility group protein HMG-I/HMG-Y	Hmga1	6.83474	0	0
60S ribosomal protein L7	Rpl7	6.8302	0	0
Eukaryotic translation initiation factor 6	Eif6	6.82712	0	0
60S ribosomal protein L35	Rpl35	6.82309	0	0
60S ribosomal protein L17	Rpl17	6.80142	0	0
40S ribosomal protein S12	Rps12	6.79938	0	0
Small ubiquitin-related modifier;Small ubiquitin-related modifier 2;Small ubiquitin-related modifier 3	Sumo3;Sumo2	6.79331	0	0
ATP synthase subunit f, mitochondrial	Atp5j2	6.79032	0	0
CD44 antigen	Cd44	6.78663	0	0
MICOS complex subunit Mic19	Chchd3	6.78518	0	0
Cytochrome c oxidase subunit 2	Mtco2	6.7828	0	0
Barrier-to-autointegration factor;Barrier-to-autointegration factor, N-terminally processed	Banf1	6.77237	0	0
Cytochrome b-c1 complex subunit 2, mitochondrial	Uqcrc2	6.76907	0	0
Eukaryotic initiation factor 4A-III;Eukaryotic initiation factor 4A-III, N-terminally processed	Gm8994;Eif4a3	6.76477	0	0
Protein transport protein Sec61 subunit beta	Gm10320;Sec61b	6.7616	0	0
Nucleolar and coiled-body phosphoprotein 1	Nolc1	6.75448	0	0
ATP synthase subunit O, mitochondrial	Atp5o	6.75236	0	0
40S ribosomal protein S8	Rps8	6.73868	0	0
Hexokinase;Hexokinase-1	Hk1	6.72817	0	0
Up-regulated during skeletal muscle growth protein 5	Usmg5	6.7242	0	0
Ribosomal L1 domain-containing protein 1	Rsl1d1	6.72104	0	0
ATP synthase F(0) complex subunit B1, mitochondrial	Atp5f1	6.72084	0	0
Nucleolar protein 56	Nop56	6.70986	0	0
60S ribosomal protein L18	Rpl18	6.70825	0	0
Matrin-3	Matr3	6.69389	0	0
Cytochrome b5 type B	Cyb5b	6.68192	0	0
60S ribosomal protein L5	Rpl5	6.67185	0	0
High mobility group protein HMGI-C	Hmga2	6.66234	0	0
MICOS complex subunit Mic60	Immt	6.65891	0	0
Interleukin enhancer-binding factor 2	Ilf2	6.6379	0	0
Serine/arginine-rich splicing factor 1	Srsf1	6.63027	0	0
Golgi-associated plant pathogenesis-related protein 1	Glipr2	6.60523	0	0
Heterogeneous nuclear ribonucleoprotein D0	Hnrnpd	6.59205	0	0
Cytochrome b-c1 complex subunit 9	Uqcr10	6.59175	0	0
Heterogeneous nuclear ribonucleoprotein A0	Hnrnpa0	6.58658	0	0
Guanine nucleotide-binding protein subunit beta-2-like 1;Guanine nucleotide-binding protein subunit beta-2-like 1, N-terminally processed	Gnb2l1	6.57082	0	0
Small nuclear ribonucleoprotein-associated protein N;Small nuclear ribonucleoprotein-associated protein B	Snrpn;Snrpb	6.56366	0	0
RNA-binding protein 3	Rbm3	6.5603	0	0
60S ribosomal protein L24	Rpl24	6.5545	0	0
Guanine nucleotide-binding protein G(I)/G(S)/G(T) subunit beta-2;Guanine nucleotide-binding protein G(I)/G(S)/G(T) subunit beta-1;Guanine nucleotide-binding protein G(I)/G(S)/G(T) subunit beta-3;Guanine nucleotide-binding protein subunit beta-4	Gnb1;Gnb2;Gnb3;Gnb4	6.54971	0	0
Probable rRNA-processing protein EBP2	Ebna1bp2	6.54808	0	0
ATP synthase subunit g, mitochondrial	Atp5l	6.54529	0	0
rRNA 2-O-methyltransferase fibrillarin	Fbl	6.53774	0	0
COMM domain-containing protein 2	Commd2	6.53021	0	6.06435
Fatty acid-binding protein, epidermal	Fabp5	6.52149	0	8.21237
Protein transport protein Sec61 subunit gamma	Sec61g	6.51946	0	0
FUN14 domain-containing protein 2	Fundc2	6.51909	0	0
Nucleolar protein 58	Nop58	6.51438	0	0
Chromobox protein homolog 3	Cbx3	6.51362	0	0
Protein mago nashi homolog 2;Protein mago nashi homolog	Magohb;Magoh	6.51232	0	0
ATP synthase-coupling factor 6, mitochondrial	Atp5j	6.49952	0	0
Probable 28S rRNA (cytosine-C(5))-methyltransferase	Nop2	6.49817	0	0
Histone H2B type 1-C/E/G;Histone H2B type 2-B;Histone H2B type 1-H;Histone H2B type 1-M	Hist1h2bc;Hist2h2bb;Hist1h2bh;Hist1h2bm	6.48909	0	0
60S ribosomal protein L31	Rpl31	6.48031	0	0
60S ribosomal protein L3	Rpl3	6.47606	0	0
Pinin	Pnn	6.46997	0	0
Equilibrative nucleoside transporter 1	Slc29a1	6.46925	0	0
U2 small nuclear ribonucleoprotein A	Snrpa1	6.4585	0	0
60S ribosomal protein L36a	Rpl36a	6.45609	0	0
Solute carrier family 2, facilitated glucose transporter member 1	Slc2a1	6.45275	0	0
60S ribosomal protein L8	Rpl8	6.4524	0	0
Protein transport protein Sec61 subunit alpha isoform 1	Sec61a1	6.44173	0	0
40S ribosomal protein S27-like;40S ribosomal protein S27	Rps27l	6.44166	0	0
Cytochrome b-c1 complex subunit 1, mitochondrial	Uqcrc1	6.43191	0	0
Splicing factor U2AF 65 kDa subunit	U2af2	6.42925	0	0
H/ACA ribonucleoprotein complex subunit 1	Gar1	6.42261	0	0
CD63 antigen	Cd63	6.41732	0	0
Heterogeneous nuclear ribonucleoprotein Q	Syncrip	6.41457	0	0
Guanine nucleotide-binding protein G(i) subunit alpha-2;Guanine nucleotide-binding protein G(o) subunit alpha;Guanine nucleotide-binding protein G(i) subunit alpha-1;Guanine nucleotide-binding protein G(k) subunit alpha	Gnai2;Gnao1;Gnai1;Gnai3	6.4127	0	0
Non-POU domain-containing octamer-binding protein	Nono	6.4008	0	0
SAP domain-containing ribonucleoprotein	Sarnp	6.39629	0	0
Sequestosome-1	Sqstm1	6.39435	0	0
Basigin	Bsg	6.39401	0	0
40S ribosomal protein S21	Rps21	6.39138	0	0
Protein S100-A10	S100a10	6.38153	0	6.69763
NADH dehydrogenase [ubiquinone] 1 beta subcomplex subunit 5, mitochondrial	Ndufb5	6.38072	0	0
DNA topoisomerase 2-alpha	Top2a	6.37502	0	0
Emerin	Emd	6.37079	0	0
ATPase family AAA domain-containing protein 1	Atad1	6.3534	0	0
60S ribosomal protein L28	Rpl28	6.3512	0	0
Dolichyl-diphosphooligosaccharide--protein glycosyltransferase subunit 2	Rpn2	6.34052	0	0
Cytochrome c, somatic	Cycs	6.34011	0	0
Ribosome production factor 2 homolog	Rpf2	6.32738	0	0
Small nuclear ribonucleoprotein Sm D2	Snrpd2	6.32529	0	0
60S ribosomal protein L27a	Rpl27a	6.31633	0	0
Calcium-binding mitochondrial carrier protein SCaMC-1	Slc25a24	6.31463	0	0
Monocarboxylate transporter 1	Slc16a1	6.30685	0	0
Mitochondrial import receptor subunit TOM70	Tomm70a	6.30198	0	0
Splicing factor, proline- and glutamine-rich	Sfpq	6.2973	0	0
Mitochondrial carrier homolog 2	Mtch2	6.29697	0	0
H/ACA ribonucleoprotein complex subunit 3	Nop10	6.29489	0	0
Lupus La protein homolog	Ssb	6.29451	0	0
Metaxin-2	Mtx2	6.29414	0	0
High mobility group protein B1	Hmgb1	6.28881	0	0
Transmembrane protein 14C	Tmem14c	6.27999	0	0
Ribosome biogenesis regulatory protein homolog	Rrs1	6.27105	0	0
60S acidic ribosomal protein P1	Rplp1	6.25952	0	0
NADH dehydrogenase [ubiquinone] 1 beta subcomplex subunit 10	Ndufb10	6.25662	0	0
ATP synthase subunit d, mitochondrial	Atp5h	6.25607	0	0
Cell growth-regulating nucleolar protein	Lyar	6.25426	0	0
L-lactate dehydrogenase;L-lactate dehydrogenase A chain;L-lactate dehydrogenase C chain	Ldha;Ldhc	6.2441	0	6.58355
60S ribosomal protein L13	Rpl13	6.23124	0	0
Splicing factor 3B subunit 3	Sf3b3	6.22961	0	0
Pre-mRNA-processing factor 19	Prpf19	6.22778	0	0
Chromobox protein homolog 5	Cbx5	6.22399	0	0
Bcl-2-associated transcription factor 1	Bclaf1	6.20876	0	0
Phosphoglycerate kinase 1;Phosphoglycerate kinase	Pgk1	6.20539	0	0
RNA-binding protein with serine-rich domain 1	Rnps1	6.19112	0	0
Actin-related protein 2/3 complex subunit 4	Arpc4	6.18823	0	0
Protein S100-A16	S100a16	6.18797	0	7.18004
Serine/arginine-rich splicing factor 6	Srsf6	6.18534	0	0
Pyridine nucleotide-disulfide oxidoreductase domain-containing protein 2	Pyroxd2	6.18444	0	6.83097
Bcl-2 homologous antagonist/killer	Bak1	6.17418	0	0
Mitochondrial import receptor subunit TOM40 homolog	Tomm40	6.17292	0	0
Core histone macro-H2A.1	H2afy	6.16723	0	0
Ras GTPase-activating protein-binding protein 1	G3bp1	6.16107	0	0
Gelsolin	Gsn	6.1577	0	6.11836
SWI/SNF-related matrix-associated actin-dependent regulator of chromatin subfamily A member 5	Smarca5	6.15345	0	0
Apolipoprotein O	Apoo	6.14697	0	0
Heterochromatin protein 1-binding protein 3	Hp1bp3	6.14261	0	0
Heterogeneous nuclear ribonucleoprotein D-like	Hnrnpdl	6.14201	0	0
U2 small nuclear ribonucleoprotein B	Snrpb2	6.13255	0	0
SUN domain-containing protein 2	Sun2	6.12146	0	0
Transformer-2 protein homolog alpha	Tra2a	6.11418	0	0
Myelin expression factor 2	Myef2	6.10789	0	0
Sodium-coupled neutral amino acid transporter 2	Slc38a2	6.10109	0	0
Ribosome-binding protein 1	Rrbp1	6.0944	0	0
H/ACA ribonucleoprotein complex subunit 2	Nhp2	6.08994	0	0
Ribosome biogenesis protein WDR12	Wdr12	6.07247	0	0
H/ACA ribonucleoprotein complex subunit 4	Dkc1	6.07085	0	0
40S ribosomal protein S17	Rps17	6.05748	0	0
Pre-mRNA-splicing factor ATP-dependent RNA helicase DHX15	Dhx15	6.05626	0	0
MKI67 FHA domain-interacting nucleolar phosphoprotein	Nifk	6.05515	0	0
116 kDa U5 small nuclear ribonucleoprotein component	Eftud2	6.052	0	5.01879
Unconventional myosin-Ic	Myo1c	6.05154	0	0
Vesicle-associated membrane protein 3;Vesicle-associated membrane protein 2	Vamp2;Vamp3	6.04747	0	0
Ran GTPase-activating protein 1	Rangap1	6.03957	0	0
RNA-binding protein 28	Rbm28	6.03599	0	0
Membrane-associated progesterone receptor component 1	Pgrmc1	6.03125	0	0
NADH dehydrogenase [ubiquinone] 1 alpha subcomplex subunit 8	Ndufa8	6.03044	0	0
Protein kinase C delta-binding protein	Prkcdbp	6.02358	0	0
Cytochrome c1, heme protein, mitochondrial	Cyc1	6.02288	0	0
40S ribosomal protein S24	Rps24	6.02053	0	0
Sorting and assembly machinery component 50 homolog	Samm50	6.01878	0	0
Cellular tumor antigen p53	Trp53;Tp53	6.01816	0	0
Proliferating cell nuclear antigen	Pcna	6.01816	0	0
Y-box-binding protein 3	Ybx3	6.01808	0	0
F-actin-capping protein subunit alpha-1;F-actin-capping protein subunit alpha-2	Capza1;Capza2	6.00975	0	6.38943
NADH dehydrogenase [ubiquinone] 1 alpha subcomplex subunit 6	Ndufa6	5.99992	0	0
Heterogeneous nuclear ribonucleoprotein U-like protein 2	Hnrnpul2	5.99812	0	0
Calcium-binding mitochondrial carrier protein Aralar1;Calcium-binding mitochondrial carrier protein Aralar2	Slc25a12;Slc25a13	5.98333	0	0
Protein LYRIC	Mtdh	5.97825	0	0
Regulator of chromosome condensation	Rcc1	5.97717	0	0
Arginase-1	Arg1	5.97303	0	6.92756
Interleukin enhancer-binding factor 3	Ilf3	5.95775	0	0
Apoptosis regulator BAX	Bax	5.95746	0	0
Mitochondrial import receptor subunit TOM22 homolog	Tomm22	5.94771	0	0
RuvB-like 1	Ruvbl1	5.9381	0	0
Ribosomal protein L15;60S ribosomal protein L15	Rpl15	5.93415	0	0
Large neutral amino acids transporter small subunit 1	Slc7a5	5.92306	0	0
Cytochrome b-c1 complex subunit 7	Uqcrb	5.91584	0	0
Translocon-associated protein subunit delta	Ssr4	5.90541	0	0
Collagen alpha-2(I) chain	Col1a2	5.90317	0	0
mRNA turnover protein 4 homolog	Mrto4	5.89926	0	0
RNA-binding protein 14	Rbm14	5.89919	0	0
Serine/arginine repetitive matrix protein 2	Srrm2	5.88092	0	0
Splicing factor 3A subunit 1	Sf3a1	5.87937	0	0
Cytochrome b-c1 complex subunit Rieske, mitochondrial;Cytochrome b-c1 complex subunit 11	Uqcrfs1	5.87252	0	0
Ribosomal protein L19;60S ribosomal protein L19	Rpl19	5.86987	0	0
Calcium uniporter protein, mitochondrial	Mcu	5.85478	0	0
60S ribosomal protein L10;60S ribosomal protein L10-like	Rpl10;Rpl10l	5.82995	0	0
Plakophilin-1	Pkp1	5.82889	0	7.30328
Pre-mRNA-processing-splicing factor 8	Prpf8	5.82617	0	0
Histone-binding protein RBBP7	Rbbp7	5.82106	0	0
RuvB-like 2	Ruvbl2	5.8194	0	0
U5 small nuclear ribonucleoprotein 200 kDa helicase	Snrnp200	5.81806	0	0
Condensin-2 complex subunit H2	Ncaph2	5.81632	0	6.67382
RNA-binding protein 39	Rbm39	5.80566	0	0
Splicing factor 3B subunit 1	Sf3b1	5.7984	0	0
NADH dehydrogenase [ubiquinone] 1 alpha subcomplex subunit 13	Ndufa13	5.79703	0	0
Cysteine and glycine-rich protein 1	Csrp1	5.79647	0	0
Anoctamin-6	Ano6	5.79411	0	0
T-complex protein 1 subunit theta	Cct8	5.79169	0	6.16307
60S ribosome subunit biogenesis protein NIP7 homolog	Nip7	5.79126	0	0
Transmembrane emp24 domain-containing protein 10	Tmed10	5.77054	0	0
Caveolin-2	Cav2	5.7664	0	0
Dolichyl-diphosphooligosaccharide--protein glycosyltransferase subunit STT3A	Stt3a	5.7658	0	0
Macrophage-capping protein	Capg	5.76296	0	0
KH domain-containing, RNA-binding, signal transduction-associated protein 1;KH domain-containing, RNA-binding, signal transduction-associated protein 3;KH domain-containing, RNA-binding, signal transduction-associated protein 2	Khdrbs1;Khdrbs2;Khdrbs3	5.76241	0	0
Myoferlin	Myof	5.74317	0	0
RRP15-like protein	Rrp15	5.74065	0	0
NADH dehydrogenase [ubiquinone] iron-sulfur protein 3, mitochondrial	Ndufs3	5.74035	0	0
Integrin alpha-5;Integrin alpha-5 heavy chain;Integrin alpha-5 light chain	Itga5	5.7326	0	0
Eukaryotic translation initiation factor 2 subunit 1	Eif2s1	5.7294	0	0
Transformer-2 protein homolog beta	Tra2b	5.71777	0	0
Lysosome-associated membrane glycoprotein 2	Lamp2	5.70703	0	0
Importin subunit beta-1	Kpnb1	5.69533	0	0
Ras-related protein Rab-2A;Ras-related protein Rab-2B	Rab2b;Rab2a;Rab4b	5.68615	0	5.28149
Torsin-1A-interacting protein 1	Tor1aip1	5.68199	0	0
Annexin A5	Anxa5	5.67111	0	0
Procollagen C-endopeptidase enhancer 1	Pcolce	5.66959	0	0
Splicing factor 3A subunit 3	Sf3a3	5.66359	0	0
WD40 repeat-containing protein SMU1;WD40 repeat-containing protein SMU1, N-terminally processed	Smu1	5.65983	0	0
T-complex protein 1 subunit epsilon	Cct5	5.64937	0	0
Sterol O-acyltransferase 1	Soat1	5.64895	0	0
ATP-dependent RNA helicase DDX18	Ddx18	5.6463	0	0
Pre-mRNA 3-end-processing factor FIP1	Fip1l1	5.64378	0	0
Probable ATP-dependent RNA helicase DDX17	Ddx17	5.6374	0	0
Charged multivesicular body protein 4b	Chmp4b	5.63415	0	0
Heterogeneous nuclear ribonucleoprotein R	Hnrnpr	5.63159	0	0
DNA topoisomerase 1	Top1	5.62854	0	0
Procollagen-lysine,2-oxoglutarate 5-dioxygenase 3	Plod3	5.62409	0	0
Serine/arginine-rich splicing factor 10	Srsf10	5.62019	0	0
Polymerase delta-interacting protein 3	Poldip3	5.61097	0	0
NAD(P) transhydrogenase, mitochondrial	Nnt	5.60955	0	0
Pumilio domain-containing protein KIAA0020	Kiaa0020	5.59665	0	0
U3 small nucleolar RNA-associated protein 15 homolog	Utp15	5.59182	0	0
WD repeat-containing protein 43	Wdr43	5.59176	0	0
Lysozyme C-1	Lyz1	5.58736	0	6.50087
Transcription intermediary factor 1-beta	Trim28	5.58259	0	0
Phosphoglycerate mutase 2;Phosphoglycerate mutase 1	Pgam2;Pgam1	5.56553	0	0
Apoptosis-inducing factor 1, mitochondrial	Aifm1	5.56406	0	0
Secretory carrier-associated membrane protein 3	Scamp3	5.56273	0	0
Tropomyosin alpha-3 chain	Tpm3;Tpm3-rs7	5.5625	0	0
Protein Red	Ik	5.55504	0	0
Apoptotic chromatin condensation inducer in the nucleus	Acin1	5.54803	0	0
Serum deprivation-response protein	Sdpr	5.54392	0	0
NADH-ubiquinone oxidoreductase 75 kDa subunit, mitochondrial	Ndufs1	5.53884	0	0
Lamin-B2	Lmnb2	5.53321	0	0
Procollagen galactosyltransferase 1	Colgalt1	5.52612	0	0
Apolipoprotein L 9a	Apol9a;Apol9b	5.52241	0	0
Thyroid hormone receptor-associated protein 3	Thrap3	5.522	0	0
Lysine-specific demethylase 2A	Kdm2a	5.49621	0	6.9642
Protein disulfide-isomerase A6	Pdia6	5.48412	0	0
Serine/threonine-protein phosphatase PP1-alpha catalytic subunit	Ppp1ca	5.4817	0	0
Eukaryotic translation initiation factor 3 subunit I	Eif3i	5.46483	0	0
WD repeat-containing protein 36	Wdr36	5.45685	0	0
Ras GTPase-activating-like protein IQGAP1	Iqgap1	5.45556	0	0
Integrin beta-1	Itgb1	5.44151	0	0
Ribosome biogenesis protein BOP1	Bop1	5.37933	0	0
NADH dehydrogenase [ubiquinone] flavoprotein 1, mitochondrial	Ndufv1	5.36657	0	0
Reticulon-4	Rtn4	5.34029	0	0
Myristoylated alanine-rich C-kinase substrate	Marcks	5.32695	0	5.29986
Cell division cycle 5-like protein	Cdc5l	5.32154	0	0
U5 small nuclear ribonucleoprotein 40 kDa protein	Snrnp40	5.29596	0	0
DnaJ homolog subfamily C member 9	Dnajc9	5.27621	0	0
Pleiotropic regulator 1	Plrg1	5.26456	0	0
THO complex subunit 5 homolog	Thoc5	5.2538	0	0
Receptor expression-enhancing protein;Receptor expression-enhancing protein 5	Reep5	5.25064	0	0
T-complex protein 1 subunit alpha	Tcp1	5.24606	0	0
Eukaryotic translation initiation factor 3 subunit C	Eif3c	5.21583	0	0
Epiplakin	Eppk1	5.21535	0	5.41973
Actin-like protein 6A	Actl6a	5.2017	0	0
MLV-related proviral Env polyprotein;Surface protein;Transmembrane protein;Retrovirus-related Env polyprotein from Fv-4 locus	Fv4	5.20066	0	0
Eukaryotic translation initiation factor 3 subunit D	Eif3d	5.17953	0	0
Ribonucleases P/MRP protein subunit POP1	Pop1	5.15467	0	0
Hexokinase-2;Hexokinase	Hk2	5.15315	0	0
DNA (cytosine-5)-methyltransferase;DNA (cytosine-5)-methyltransferase 1	Dnmt1	5.12853	0	0
Structural maintenance of chromosomes protein 1A	Smc1a	5.12513	0	0
ATP-dependent RNA helicase DDX24	Ddx24	5.12415	0	0
Regulator of nonsense transcripts 1	Upf1	5.12173	0	0
Integrin alpha-3;Integrin alpha-3 heavy chain;Integrin alpha-3 light chain	Itga3	5.11969	0	0
UDP-N-acetylglucosamine--peptide N-acetylglucosaminyltransferase 110 kDa subunit	Ogt	5.11684	0	6.16885
Transducin beta-like protein 3	Tbl3	5.1117	0	0
Alpha-actinin-4	Actn4	5.10408	0	0
Scaffold attachment factor B1;Scaffold attachment factor B2	Safb;Safb2	5.08297	0	0
Nuclear mitotic apparatus protein 1	Numa1	5.07273	0	0
Protein SON	Son	5.07063	0	0
Heterogeneous nuclear ribonucleoprotein H;Heterogeneous nuclear ribonucleoprotein H, N-terminally processed;Heterogeneous nuclear ribonucleoprotein H2	Hnrnph1;Hnrnph2	5.02082	0	0
THO complex subunit 6 homolog	Thoc6	5.01263	0	0
ATPase family AAA domain-containing protein 2	Atad2	5.0004	0	0
Aladin	Aaas	4.9871	0	0
Vigilin	Hdlbp	4.98138	0	0
Filamin-B	Flnb	4.90655	0	0
E3 ubiquitin-protein ligase UHRF1	Uhrf1	4.87772	0	0
F-box only protein 50	Nccrp1	4.85399	0	5.74954
DNA replication licensing factor MCM4	Mcm4	4.84675	0	0
Aspartate--tRNA ligase, cytoplasmic	Dars	4.82502	0	0
Nesprin-3	Syne3	4.80622	0	0
Nucleolar protein 10	Nol10	4.78308	0	0
SAFB-like transcription modulator	Sltm	4.78103	0	0
Protein RRP5 homolog	Pdcd11	4.76809	0	0
Guanine nucleotide-binding protein-like 3	Gnl3	4.71559	0	0
26S protease regulatory subunit 7	Psmc2	4.71064	0	0
DmX-like protein 1	Dmxl1	4.68788	0	5.51061
Ras GTPase-activating protein-binding protein 2	G3bp2	4.64254	0	0
Fructose-bisphosphate aldolase;Fructose-bisphosphate aldolase A	Aldoa;Aldoart1	4.57319	0	6.27635
Nucleoprotein TPR	Tpr	4.56733	0	4.81409
Filamin-C	Flnc	4.20175	0	0
E3 SUMO-protein ligase RanBP2	Ranbp2	4.16631	0	0
E3 ubiquitin-protein ligase RNF213	Rnf213	3.94752	0	0
Tubulin alpha-4A chain	Tuba4a	0	0	5.63494
Histone-lysine N-methyltransferase EHMT1	Ehmt1	0	0	5.58634
Histone deacetylase complex subunit SAP130	Sap130	0	0	6.00277
Protein-glutamine gamma-glutamyltransferase K	Tgm1	0	0	6.38034
Plastin-3	Pls3	0	0	5.36925
Calmodulin-like protein 3	Calml3	0	0	6.86301
Keratin, type II cytoskeletal 75	Krt75	0	0	5.70391
Keratin, type I cytoskeletal 23	Krt23	0	0	0
Heat shock protein beta-1	Hspb1	0	0	6.9852
Peroxiredoxin-6	Prdx6	0	0	6.20812
Triosephosphate isomerase	Tpi1	0	0	6.43856
Potassium channel subfamily K member 3	Kcnk3	0	0	6.5965
Heat shock 70 kDa protein 1A;Heat shock 70 kDa protein 1B	Hspa1a;Hspa1b	0	0	6.08052
Catalase	Cat	0	0	5.76127
Fibulin-2	Fbln2	0	0	0
Protein S100-A11	S100a11	0	0	6.70683
Tubulin beta-4B chain;Tubulin beta-4A chain	Tubb4b;Tubb4a	0	0	0
Serpin B5	Serpinb5	0	0	6.90277
Protein-glutamine gamma-glutamyltransferase E;Protein-glutamine gamma-glutamyltransferase E 50 kDa catalytic chain;Protein-glutamine gamma-glutamyltransferase E 27 kDa non-catalytic chain	Tgm3	0	0	5.24704
Gasdermin-A2;Gasdermin-A;Gasdermin-A3	Gsdma3;Gsdma2;Gsdma	0	0	5.75961
Oxysterol-binding protein	Osbpl1a	0	0	5.88379
Ubiquitin thioesterase OTU1	Yod1	0	0	5.98301
Protein POF1B	Pof1b	0	0	5.81215
Tripartite motif-containing protein 29	Trim29	0	0	5.74963
NADH dehydrogenase [ubiquinone] 1 alpha subcomplex subunit 2	Ndufa2	0	0	0
Protein S100-A14	S100a14	0	0	6.48833
Plakophilin-3	Pkp3	0	0	5.41078
Destrin	Dstn	0	0	5.87319
Tyrosine-protein kinase BAZ1B	Baz1b	0	0	5.27184
Proteasome subunit alpha type-5	Psma5	0	0	6.01414
