# Supplementary figures and images for: A Commander-independent function of COMMD3 in endosomal trafficking
Source: eLife journal article supplement (doi:10.7554/elife.105264), 2025-02-17

# Fig. 2a

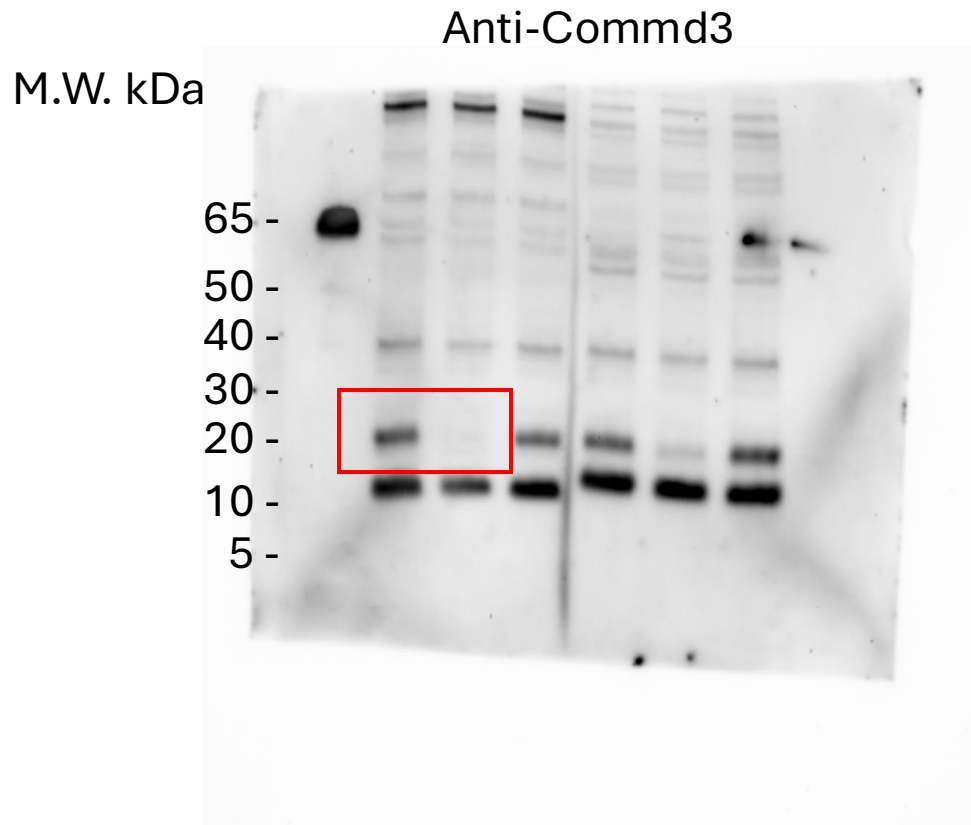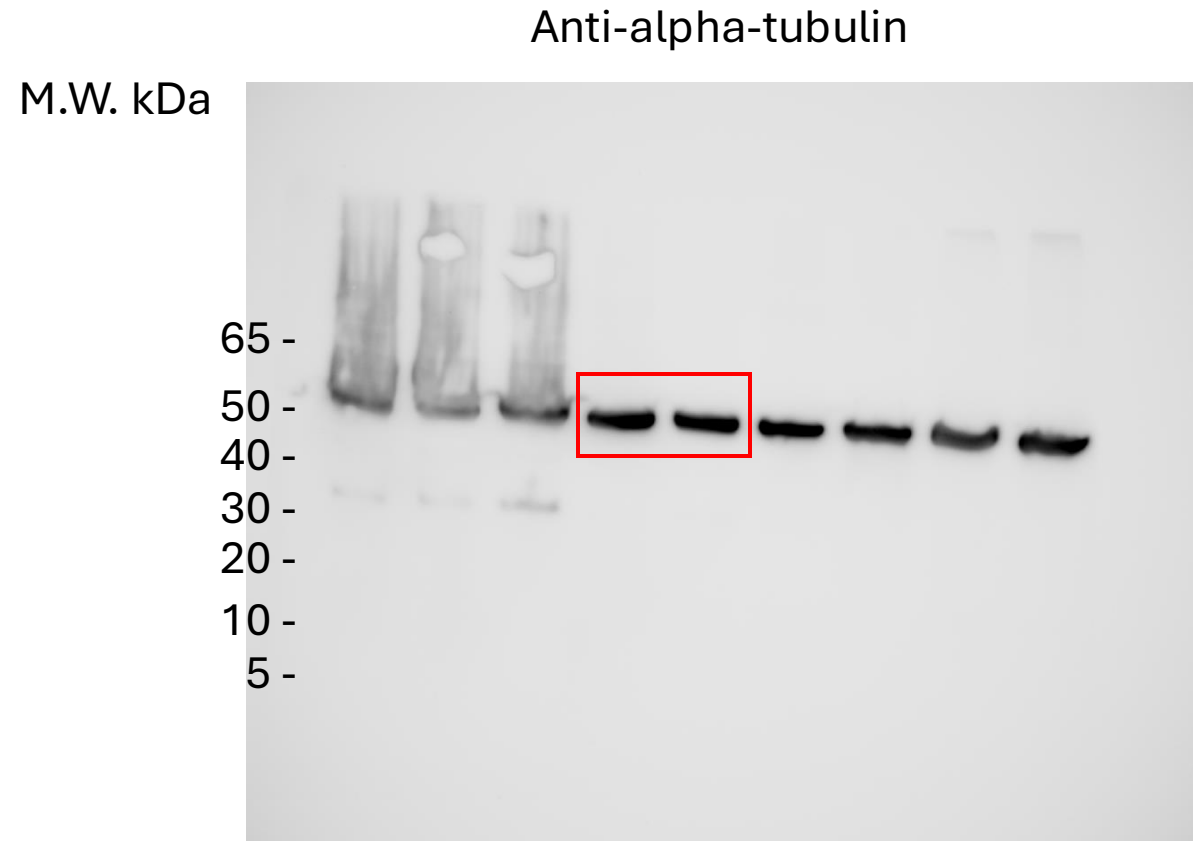

Supplement: fig2-data1 [file elife-105264-fig2-data1-v1.zip]

# Fig. 5a

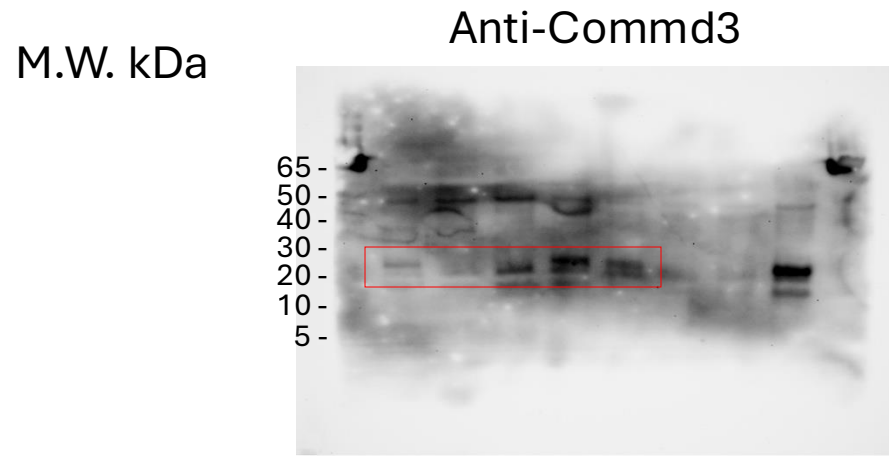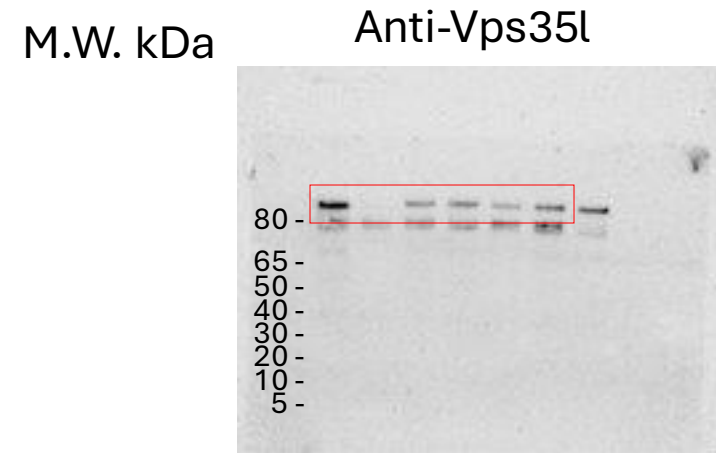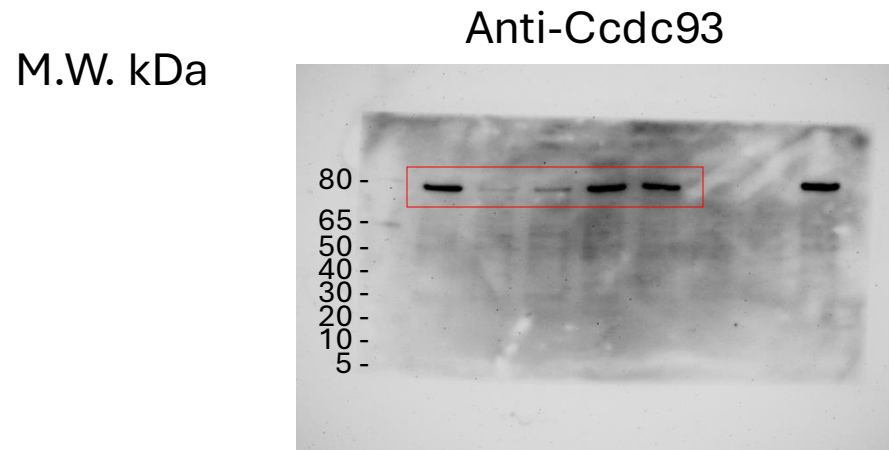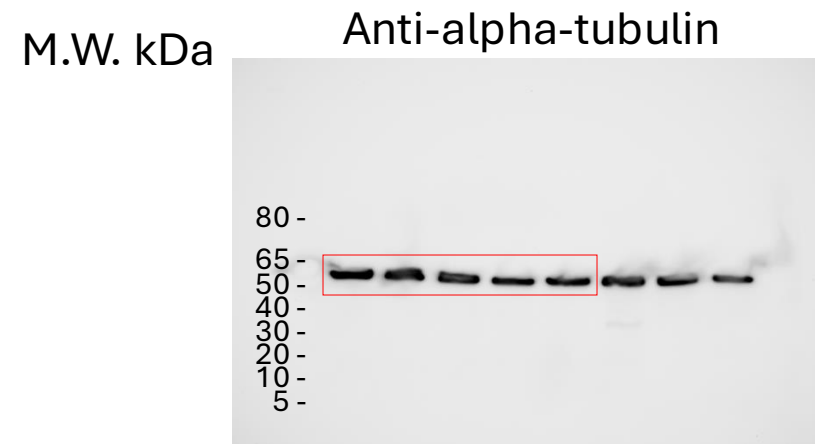

Supplement: fig5-data1 [file elife-105264-fig5-data1-v1.zip]

# Fig. 6g

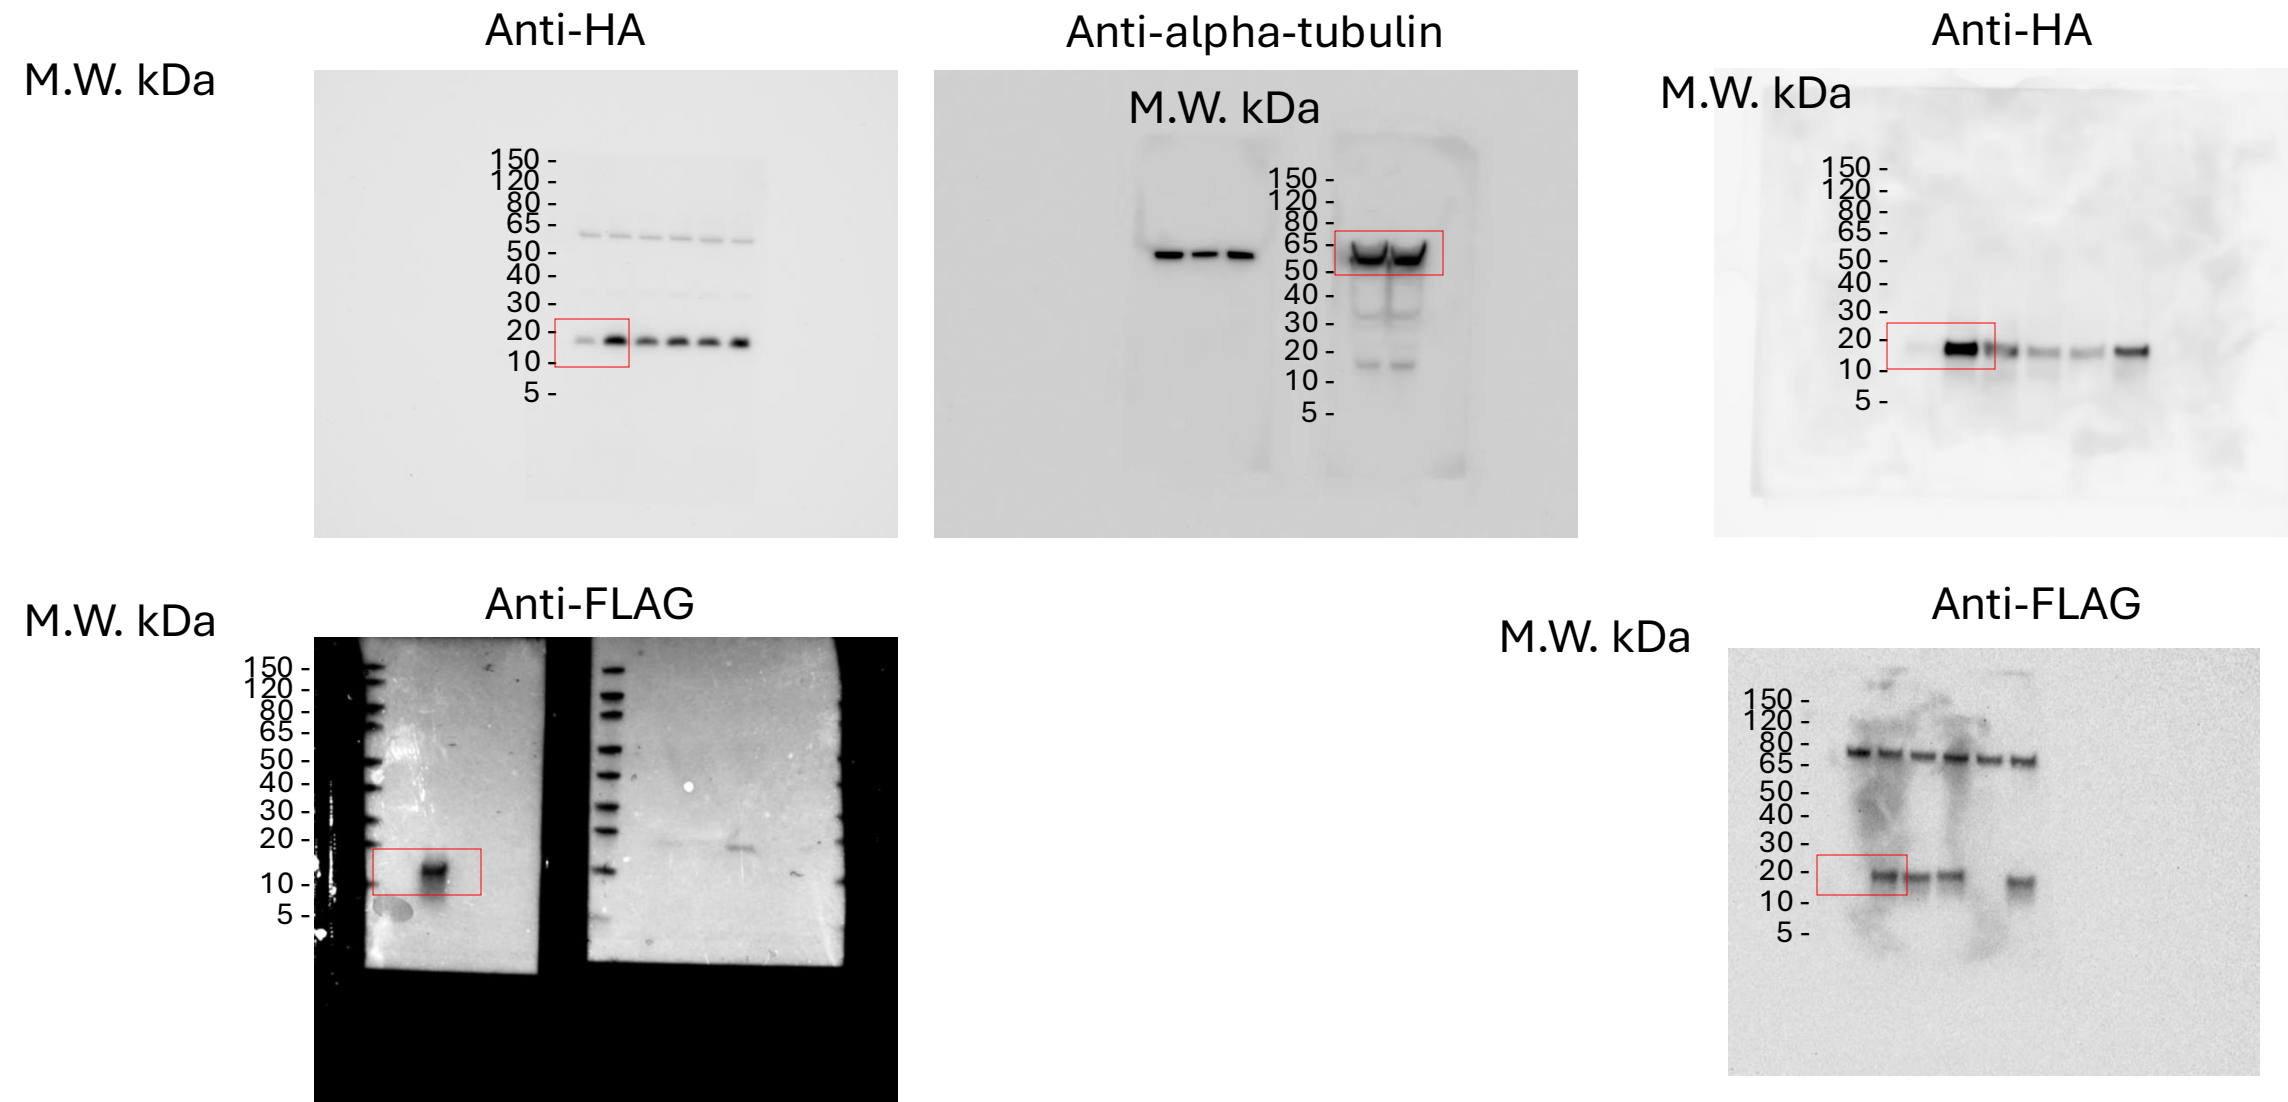

Supplement: fig6-data3 [file elife-105264-fig6-data3-v1.zip]
